# Supplementary material
Source: PubMed Central journal article supplement (PMC4983742)

## Supporting Information

### Small Molecule Antagonists of the Nuclear Androgen Receptor for the Treatment of Castration-Resistant Prostate Cancer

James K. Johnson,<sup>†</sup> Erin M. Skoda,<sup>†</sup> Jianhua Zhou,<sup>§</sup> Erica Parrinello,<sup>§</sup> Dan Wang,<sup>§</sup> Katherine O'Malley,<sup>§</sup> Benjamin R. Eyer,<sup>†</sup> Mustafa Kazancioglu,<sup>†</sup> Kurtis Eisermann,<sup>§</sup> Paul A. Johnston,<sup>#</sup> Joel B. Nelson,<sup>§</sup> Zhou Wang,<sup>\*,§</sup> and Peter Wipf<sup>\*,†,#</sup>

<sup>†</sup>Department of Chemistry, University of Pittsburgh, Pittsburgh, Pennsylvania 15260, USA

<sup>§</sup>Department of Urology, University of Pittsburgh School of Medicine, Pittsburgh, Pennsylvania 15232, USA

<sup>#</sup>Department of Pharmaceutical Sciences, University of Pittsburgh, Pittsburgh, Pennsylvania 15261, USA

#### Contents:

|                                                             |         |
|-------------------------------------------------------------|---------|
| 1. Biological Assays and SAR Overview                       | Page 2  |
| 2. Chemical Synthesis                                       | Page 7  |
| 2.1 General                                                 | Page 7  |
| 2.2 Experimental Part                                       | Page 8  |
| 2.3 References                                              | Page 45 |
| 3. Copies of <sup>1</sup> H and <sup>13</sup> C NMR Spectra | Page 46 |

## 1. Biological Materials and Methods

### *Materials*

Phosphate buffered saline (PBS) solution was purchased from Fisher Scientific (MA, USA). Trypsin-EDTA solution, dimethyl sulfoxide (DMSO), Roswell Park Memorial Institute (RPMI) 1640 medium, ethanol (200 proof), puromycin powder, and G418 powder were purchased from Sigma-Aldrich (MO, USA). Fetal bovine Serum (FBS), penicillin-streptomycin solution were purchased from Invitrogen (NY, USA). Dual-Luciferase® Reporter Assay System was purchased from Promega (WI, USA). PSA6.1--luc plasmid was a gift from Dr. Marianne Sadar at the University of British Columbia (BC, CA) and pRL-TK Renilla luciferase reporter plasmid was purchased from Promega (WI, USA). The C4-2 castration-resistant prostate cancer cell line was kindly provided by Dr. Leland W. K. Chung (Cedars-Sinai Medical Center).

### *Luciferase Assay*

The C4-2-PSA-rl stable cell line was generated by transfection with PSA6.1--luc and pRL-TK followed by stable selection using G418 and puromycin. C4-2-PSA-rl stable cells were cultured in RPMI 1640 medium with 10% FBS, 1% penicillin-streptomycin, 1% L-glutamine, 10 mg/mL puromycin, and 50 mg/mL G418. C4-2-PSA-rl cells were seeded in 24-well plates such that they reached 75-80% cell monolayer density after 24 h. C4-2-PSA-rl cells were then treated for 24 h with 0, 0.2, 0.8, 3.2, 12.8, or 25  $\mu$ M of each compound dissolved in DMSO (0.8% DMSO/well) in the presence of 1 nM synthetic androgen R1881, with each experimental condition in triplicate. The cells were also treated in parallel with 12.8  $\mu$ M compound **1** and 12.8  $\mu$ M MDV3100 as positive controls. Each compound was tested in at least two independent experiments. Luciferase activity was assayed using the Dual-Luciferase® Reporter Assay System (Promega) using LMax II Microplate Reader (Molecular Devices). The luciferase assay results were acquired using SoftMax Pro5.45 software (Molecular Devices) and analyzed using GraphPad Prism. PSA6.1-luc activity was normalized to the Renilla luciferase activity.

**Table S1.** Overview of analog structures and biochemical activities.

| Entry | Analog | Structure | EC <sub>50</sub> [ $\mu$ M] |
|-------|--------|-----------|-----------------------------|
| 1     | 1      |           | 7.3±2.5 <sup>c</sup>        |
| 2     | 5a     |           | >25 <sup>a</sup>            |
| 3     | 5b     |           | 14.5±3.2 <sup>b</sup>       |
| 4     | 5c     |           | >25 <sup>a</sup>            |
| 5     | 5d     |           | >25 <sup>a</sup>            |
| 6     | 5e     |           | 12.0±1.6 <sup>b</sup>       |
| 7     | 5f     |           | 12.6±7.7 <sup>b</sup>       |
| 8     | 5g     |           | 11.1±5.3 <sup>b</sup>       |
| 9     | 5h     |           | >25 <sup>a</sup>            |
| 10    | 5i     |           | 18.4±9.2 <sup>b</sup>       |
| 11    | 5j     |           | 11.1±3.3 <sup>a</sup>       |

|    |    |  |                   |
|----|----|--|-------------------|
| 12 | 5k |  | $3.1 \pm 1.1^a$   |
| 13 | 5l |  | $14.7 \pm 4.4^a$  |
| 14 | 5m |  | $16.6 \pm 4.8^b$  |
| 15 | 6  |  | $10.8 \pm 5.7^b$  |
| 16 | 7  |  | $13.7 \pm 0.8^b$  |
| 17 | 8  |  | $14.4 \pm 3.7^b$  |
| 18 | 9  |  | $>25^a$           |
| 19 | 10 |  | $20.3 \pm 11.6^a$ |
| 20 | 11 |  | $>25^a$           |
| 21 | 12 |  | $>25^b$           |
| 22 | 13 |  | $16.1 \pm 3.3^b$  |
| 23 | 14 |  | $12.7 \pm 0.8^a$  |

|    |              |                                                                                      |                 |
|----|--------------|--------------------------------------------------------------------------------------|-----------------|
| 24 | 15           | 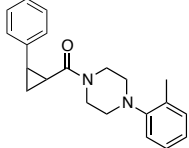    | $2.9 \pm 1.0^b$ |
| 25 | 16           |    | $>25^b$         |
| 26 | 18a          |    | $>25^b$         |
| 27 | 18b          |    | $>25^b$         |
| 28 | 18c          |    | $7.2 \pm 2.7^c$ |
| 29 | 20a          |   | $>25^a$         |
| 30 | 20b          |  | $>25^c$         |
| 31 | 26a          |  | $7.7 \pm 1.6^b$ |
| 32 | 26b          |  | $7.9 \pm 2.8^a$ |
| 33 | Enzalutamide |  | $1.1 \pm 0.5^e$ |
| 34 | 27           |   | $2.7 \pm 1.1^d$ |

|    |                    |                                                                                    |                       |
|----|--------------------|------------------------------------------------------------------------------------|-----------------------|
| 35 | <i>(1S,2R)</i> -27 | 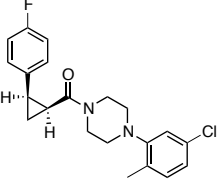 | 1.7±0.2 <sup>a</sup>  |
| 36 | <i>(1R,2S)</i> -27 |  | 15.2±3.3 <sup>a</sup> |

Assay repeats: <sup>a</sup>n=2; <sup>b</sup>n=3; <sup>c</sup>n=4; <sup>d</sup>n=5; <sup>e</sup>n=6;

## 2. Chemistry

### 2.1 General

Moisture and air-sensitive reactions were performed under N<sub>2</sub> or Ar atmosphere and glassware used for these reactions was flamed dried and cooled under N<sub>2</sub> or Ar prior to use. THF and Et<sub>2</sub>O were distilled from sodium/benzophenone ketyl. DMF and CH<sub>2</sub>Cl<sub>2</sub> were distilled from CaH<sub>2</sub>. 1,4-Dioxane was purchased from Acros (Sure/Seal bottle) and used as received. Et<sub>3</sub>N was distilled from CaH<sub>2</sub> and stored over KOH. Toluene was purified by passage through an activated alumina filtration system. Melting points were determined using a Mel-Temp II instrument and are not corrected. Infrared spectra were determined using a Smiths Detection IdentifyIR FT-IR spectrometer. High-resolution mass spectra were obtained on a Micromass UK Limited, Q-TOF Ultima API, Thermo Scientific Exactive Orbitrap LC-MS. Automated column chromatography was done using an Isco Combiflash Rf. <sup>1</sup>H and <sup>13</sup>C NMR spectra were obtained on Bruker Advance 300 MHz, 400 MHz, or 500 MHz instruments. Chemical shifts (δ) were reported in parts per million with the residual solvent peak used as an internal standard, δ <sup>1</sup>H/<sup>13</sup>C (Solvent): 7.26/77.00 (CDCl<sub>3</sub>); 2.05/29.84 (acetone-d<sub>6</sub>); 2.50/39.52 (DMSO-d<sub>6</sub>), 3.31/49.00 (CD<sub>3</sub>OD); and are tabulated as follows: chemical shift, multiplicity (s = singlet, brs = broad singlet, d = doublet, brd = broad doublet, t = triplet, app t = apparent triplet, q = quartet, m = multiplet), number of protons, and coupling constant(s). <sup>13</sup>C NMR spectra were obtained at 75 MHz, 100 MHz, or 125 MHz using a proton-decoupled pulse sequence and are tabulated by observed peak. CDCl<sub>3</sub> was filtered through dried basic alumina prior to use. Thin-layer chromatography was performed using pre-coated silica gel 60 F<sub>254</sub> plates (EMD, 250 μm thickness) and visualization was accomplished with a 254 nm UV light and by staining with a PMA solution (5 g of phosphomolybdic acid in 100 mL of 95% EtOH), Vaughn's reagent (4.8 g of (NH<sub>4</sub>)<sub>6</sub>Mo<sub>7</sub>O<sub>24</sub>•4H<sub>2</sub>O and 0.2 g of Ce(SO<sub>4</sub>)<sub>2</sub> in 100 mL of a 3.5 N H<sub>2</sub>SO<sub>4</sub> solution) or a KMnO<sub>4</sub> solution (1.5 g of KMnO<sub>4</sub> and 1.5 g of K<sub>2</sub>CO<sub>3</sub> in 100 mL of a 0.1% NaOH solution). Chromatography on SiO<sub>2</sub> (Silicycle, Silia-P Flash Silica Gel or SiliaFlash® P60, 40-63 μm) was used to purify crude reaction mixtures. Final products were of >95% purity as analyzed by RP HPLC (Alltech Prevail C-18, 100 × 4.6 mm, 1 mL/min, CH<sub>3</sub>CN, H<sub>2</sub>O and 0.1% TFA) with UV (210, 220 and 254 nm), ELS (nebulizer 45 °C, evaporator 45 °C, N<sub>2</sub> flow 1.25 SLM), and

MS detection using a Thermo Scientific Exactive Orbitrap LC-MS (ESI positive). All other materials were obtained from commercial sources and used as received.

## 2.2 Experimental Part:

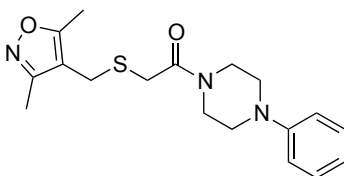

### 2-(((3,5-Dimethylisoxazol-4-yl)methyl)thio)-1-(4-phenylpiperazin-1-yl)ethanone (**5a**).

To a solution of 2-(((3,5-dimethylisoxazol-4-yl)methyl)thio)acetic acid **3a** (0.0200 g, 0.0994 mmol) in CH<sub>2</sub>Cl<sub>2</sub> (1.25 mL) was added 1-phenylpiperazine **4a** (0.0190 g, 0.119 mmol) and Et<sub>3</sub>N (41 μL, 0.298 mmol). The reaction mixture was cooled to 0 °C, treated with T3P (50 wt. % solution in EtOAc, 105 μL, 0.149 mmol), allowed to warm to room temperature, stirred for 2 d, diluted with CH<sub>2</sub>Cl<sub>2</sub> and washed with satd. aqueous NH<sub>4</sub>Cl, satd. aqueous NaHCO<sub>3</sub>, brine, dried (Na<sub>2</sub>SO<sub>4</sub>), filtered, and concentrated *in vacuo*. The crude residue was purified by chromatography on SiO<sub>2</sub> (ISCO, 12 g column, liquid load in CH<sub>2</sub>Cl<sub>2</sub>, EtOAc/hexanes gradient (10-100%), product eluted at 60%) to give product **5a** (0.0330 g, 0.0955 mmol, 96%, 100% pure by ELSD) as a colorless solid: Mp 74-75 °C; IR (ATR) 2856, 2802, 1627, 1599, 1496, 1440, 1416, 1229, 1141, 1034, 909, 765, 698 cm<sup>-1</sup>; <sup>1</sup>H NMR (300 MHz, CDCl<sub>3</sub>) δ 7.26-7.21 (m, 1 H), 6.89-6.83 (m, 3 H), 3.72 (app t, 2 H, *J* = 5.2 Hz), 3.56 (s, 2 H), 3.56-3.54 (m, 2 H), 3.18 (s, 2 H), 3.15-3.10 (m, 2 H), 2.34 (s, 3 H), 2.23 (s, 3 H); <sup>13</sup>C NMR (75 MHz, CDCl<sub>3</sub>) δ 166.5, 165.8, 158.6, 149.8, 128.2, 119.6, 115.6, 108.7, 48.5, 48.3, 45.3, 40.7, 31.0, 22.7, 10.0, 9.1; HRMS (ESI) *m/z* calcd for C<sub>18</sub>H<sub>24</sub>N<sub>3</sub>O<sub>2</sub>S ([M+H]<sup>+</sup>) 346.1584, found: 346.1571.

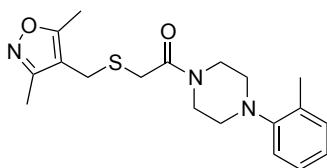

### 2-(((3,5-Dimethylisoxazol-4-yl)methyl)thio)-1-(4-(*o*-tolyl)piperazin-1-yl)ethanone

(**5b**). To a solution of 2-(((3,5-dimethylisoxazol-4-yl)methyl)thio)acetic acid (**3a**, 0.0200



g, 0.0994 mmol) in CH<sub>2</sub>Cl<sub>2</sub> (1.25 mL) was added 1-(*o*-tolyl)piperazine **4b** (0.0210 g, 0.119 mmol) and Et<sub>3</sub>N (41 μL, 0.298 mmol). The reaction mixture was cooled to 0 °C, treated with T3P (50 wt.% solution in EtOAc, 105 μL, 0.149 mmol), allowed to warm to room temperature, stirred for 2 d, diluted with CH<sub>2</sub>Cl<sub>2</sub> and washed with satd. aqueous NH<sub>4</sub>Cl, satd. aqueous NaHCO<sub>3</sub>, brine, dried (Na<sub>2</sub>SO<sub>4</sub>), filtered, and concentrated *in vacuo*. The crude material was purified by chromatography on SiO<sub>2</sub> (ISCO, 12 g column, liquid load in CH<sub>2</sub>Cl<sub>2</sub>, EtOAc/hexanes gradient (10-100%), product eluted at 40%) to give **5b** (0.0348 g, 0.0968 mmol, 97%, 100% pure by ELSD) as a colorless solid: Mp 89-91 °C; IR (ATR) 2959, 2828, 1631, 1492, 1430, 1261, 1226, 1138, 1036, 979, 959, 776, 726 cm<sup>-1</sup>; <sup>1</sup>H NMR (300 MHz, CDCl<sub>3</sub>) δ 7.18 (dd, 2 H, *J* = 9.0, 7.5 Hz), 7.01 (dd, 2 H, *J* = 14.1, 9.0 Hz), 3.76 (app t, 2 H, *J* = 4.9 Hz), 3.63 (s, 2 H), 3.59 (app t, 2 H, *J* = 4.9 Hz), 3.24 (s, 2 H), 2.93 (app t, 2 H, *J* = 4.9 Hz), 2.88 (app t, 2 H, *J* = 4.9 Hz), 2.43 (s, 3 H), 2.32 (s, 3 H), 2.30 (s, 3 H); <sup>13</sup>C NMR (75 MHz, CDCl<sub>3</sub>) δ 166.5, 165.8, 158.7, 149.6, 131.7, 130.2, 125.7, 122.8, 118.1, 108.7, 50.8, 50.6, 46.0, 41.3, 31.1, 22.7, 16.7, 10.0, 9.1; HRMS (ESI) *m/z* calcd for C<sub>19</sub>H<sub>26</sub>N<sub>3</sub>O<sub>2</sub>S ([M+H]<sup>+</sup>) 360.1740, found 360.1725.

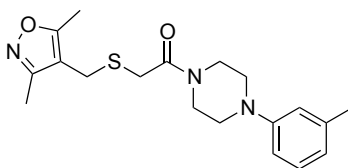

**2-(((3,5-Dimethylisoxazol-4-yl)methyl)thio)-1-(4-(*m*-tolyl)piperazin-1-yl)ethanone**

**(5c).** A solution of 2-(((3,5-dimethylisoxazol-4-yl)methyl)thio)acetic acid (**3a**, 0.0200 g, 0.0994 mmol) in CH<sub>2</sub>Cl<sub>2</sub> (1.25 mL) was added 1-(*m*-tolyl)piperazine (**4c**, 21 μL, 0.119 mmol), Et<sub>3</sub>N (41 μL, 0.298 mmol). The reaction mixture was cooled to 0 °C, treated with T3P (50 wt.% solution in EtOAc, 105 μL, 0.149 mmol), allowed to warm to room temperature, stirred for 2 d, diluted with CH<sub>2</sub>Cl<sub>2</sub> and washed with satd. aqueous NH<sub>4</sub>Cl, satd. aqueous NaHCO<sub>3</sub>, brine, dried (Na<sub>2</sub>SO<sub>4</sub>), filtered, and concentrated *in vacuo*. The crude residue was purified by chromatography on SiO<sub>2</sub> (ISCO, 12 g column, liquid load in CH<sub>2</sub>Cl<sub>2</sub>, EtOAc/hexanes gradient (10-100%), eluted at 60%) to give **5c** (0.0343 g, 0.954 mmol, 96%, 99.5% pure by ELSD) as a yellow oil: IR (ATR) 2918, 2819, 1635, 1600, 1493, 1424, 1244, 1192, 1145, 995, 957, 775, 729, 694 cm<sup>-1</sup>; <sup>1</sup>H NMR (300 MHz, CDCl<sub>3</sub>) δ 7.17 (app t, 1 H, *J* = 7.8 Hz), 6.75-6.72 (m, 3 H), 3.76 (app t, 2 H, *J* = 5.2 Hz),

3.61 (s, 2 H), 3.60-3.58 (m, 2 H), 3.23 (s, 2 H), 3.17 (ddd, 4 H,  $J = 5.5, 5.2, 5.0$  Hz), 2.41 (s, 3 H), 2.32 (s, 3 H), 2.28 (s, 3 H);  $^{13}\text{C}$  NMR (75 MHz,  $\text{CDCl}_3$ )  $\delta$  166.5, 165.8, 158.6, 149.8, 138.0, 128.1, 120.5, 116.5, 112.8, 108.7, 48.6, 48.5, 45.3, 40.8, 31.0, 22.7, 20.7, 10.0, 9.1; HRMS (ESI)  $m/z$  calcd for  $\text{C}_{19}\text{H}_{26}\text{N}_3\text{O}_2\text{S}$  ( $[\text{M}+\text{H}]^+$ ) 360.1740, found: 360.1725.

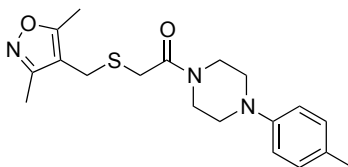

**2-(((3,5-Dimethylisoxazol-4-yl)methyl)thio)-1-(4-(*p*-tolyl)piperazin-1-yl)ethanone**

**(5d)**. A solution of 2-(((3,5-dimethylisoxazol-4-yl)methyl)thio)acetic acid (**3a**, 0.0200 g, 0.0994 mmol) in  $\text{CH}_2\text{Cl}_2$  (1.25 mL) was added 1-(*p*-tolyl)piperazine (**4d**, 21  $\mu\text{L}$ , 0.119 mmol),  $\text{Et}_3\text{N}$  (41  $\mu\text{L}$ , 0.298 mmol). The reaction mixture was cooled to 0  $^\circ\text{C}$ , treated with T3P (50 wt.% solution in EtOAc, 105  $\mu\text{L}$ , 0.149 mmol), allowed to warm to room temperature, stirred for 2 d, diluted with  $\text{CH}_2\text{Cl}_2$ , washed with satd. aqueous  $\text{NH}_4\text{Cl}$ , satd. aqueous  $\text{NaHCO}_3$ , and brine, dried ( $\text{Na}_2\text{SO}_4$ ), filtered, and concentrated *in vacuo*. The crude residue was purified by chromatography on  $\text{SiO}_2$  (ISCO, 12 g column, liquid load in  $\text{CH}_2\text{Cl}_2$ , EtOAc/hexanes gradient ((10-100%)), eluted at 60%) to give **5d** (0.0266 g, 0.0740 mmol, 74%, 100% pure by ELSD) as a red solid: Mp 83-85  $^\circ\text{C}$ ; IR (ATR) 2855, 2801, 1627, 1514, 1440, 1416, 1261, 1230, 1142, 1043, 960, 815, 724  $\text{cm}^{-1}$ ;  $^1\text{H}$  NMR (300 MHz,  $\text{CDCl}_3$ )  $\delta$  7.10 (d, 2 H,  $J = 8.1$  Hz), 6.85 (d, 2 H,  $J = 8.1$  Hz), 3.77 (app t, 2 H,  $J = 4.7$  Hz), 3.61-3.58 (m, 4 H), 3.23 (s, 2 H), 3.13 (ddd, 4 H,  $J = 5.6, 5.5, 4.7$  Hz), 2.41 (s, 3 H), 2.28, (s, 6 H);  $^{13}\text{C}$  NMR (75 MHz,  $\text{CDCl}_3$ )  $\delta$  167.5, 166.8, 159.7, 148.7, 130.3, 129.8, 117.0, 109.7, 50.1, 49.9, 46.4, 41.8, 32.1, 23.7, 20.4, 11.0, 10.1; HRMS (ESI)  $m/z$  calcd for  $\text{C}_{19}\text{H}_{26}\text{N}_3\text{O}_2\text{S}$  ( $[\text{M}+\text{H}]^+$ ) 360.1740, found 360.1725.

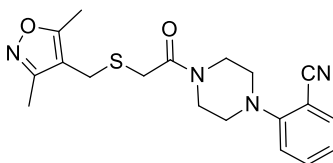

**2-(4-(2-(((3,5-Dimethylisoxazol-4-yl)methyl)thio)acetyl)piperazin-1-yl)benzonitrile**

**(5e)**. To a solution of ((3,5-dimethylisoxazol-4-yl)methyl]thio)acetic acid (**3a**, 0.0280 g,

0.132 mmol) in CH<sub>2</sub>Cl<sub>2</sub> (1.3 mL) was added 2-(piperazin-1-yl)benzotrile (**4e**, 0.0253 g, 0.132 mmol) and Et<sub>3</sub>N (56 μL, 0.400 mmol). The reaction mixture was cooled to 0 °C, treated with T3P (50 wt.% solution in EtOAc, 140 μL, 0.200 mmol), allowed to warm to room temperature, stirred for 20 h, diluted with CH<sub>2</sub>Cl<sub>2</sub> and washed with satd. aqueous NH<sub>4</sub>Cl, satd. aqueous NaHCO<sub>3</sub>, and brine, dried (Na<sub>2</sub>SO<sub>4</sub>), filtered, and concentrated *in vacuo*. The crude residue was purified by chromatography on SiO<sub>2</sub> (95:5, CH<sub>2</sub>Cl<sub>2</sub>/MeOH) to give **5e** (0.0390 g, 0.105 mmol, 80%, 99.9% pure by ELSD) as a yellow solid: Mp 142-143 °C; IR (neat) 2919, 2216, 1637, 1593, 1420, 1232 cm<sup>-1</sup>; <sup>1</sup>H NMR (400 MHz, CDCl<sub>3</sub>) δ 7.61 (dd, 1 H, *J* = 7.6, 1.6 Hz), 7.51 (ddd, 1 H, *J* = 8.4, 7.6, 1.6 Hz), 7.09 (dt, 1 H, *J* = 7.6, 0.9 Hz), 7.02 (d, 1 H, *J* = 8.4 Hz), 3.82 (app t, 2 H, *J* = 4.8 Hz), 3.67 (app t, 2 H, *J* = 4.8 Hz), 3.62 (s, 2 H), 3.24 (s, 2 H), 3.24-3.21 (m, 2 H) 3.15 (app t, 2 H, *J* = 5.4 Hz), 2.41 (s, 3 H), 2.28 (s, 3 H); <sup>13</sup>C NMR (100 MHz, CDCl<sub>3</sub>) δ 167.6, 166.7, 159.6, 154.9, 134.3, 133.9, 122.7, 118.9, 118.0, 109.7, 106.7, 51.9, 51.1, 46.6, 41.8, 32.1, 23.7, 11.0, 10.1; HRMS (ESI) *m/z* calcd for C<sub>19</sub>H<sub>23</sub>N<sub>4</sub>O<sub>2</sub>S ([M+H]<sup>+</sup>) 371.1542, found 371.1536.

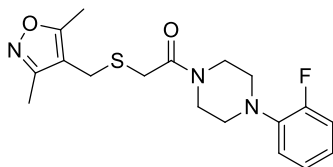

**2-(((3,5-Dimethylisoxazol-4-yl)methyl)thio)-1-(4-(2-fluorophenyl)piperazin-1-yl)ethan-1-one (5f)**. To a solution of 2-(((3,5-dimethylisoxazol-4-yl)methyl)thio)acetic acid (**3a**, 0.0758 g, 0.377 mmol) in CH<sub>2</sub>Cl<sub>2</sub> (3.8 mL) was added 1-(2-fluorophenyl)-piperazine (**4f**, 0.0814 g, 0.452 mmol) and Et<sub>3</sub>N (262 μL, 1.88 mmol). The reaction mixture was cooled to 0 °C, treated with T3P (50 wt. % solution in EtOAc, 399 μL, 0.565 mmol), allowed to warm to room temperature, stirred for 20 h, diluted with CH<sub>2</sub>Cl<sub>2</sub>, and washed with satd. aqueous NH<sub>4</sub>Cl solution, satd. aqueous NaHCO<sub>3</sub> solution, and brine, dried (Na<sub>2</sub>SO<sub>4</sub>), filtered, and concentrated *in vacuo*. The crude residue was purified by chromatography on SiO<sub>2</sub> (3:2, EtOAc/hexanes, base washed with 0.1% Et<sub>3</sub>N prior to use) to give **5f** (0.134 g, 0.369 mmol, 98%, 100% pure by ELSD) as a light yellow oil: IR (ATR) 2918, 2827, 1636, 1613, 1500, 1439, 1237, 1195, 1147, 1031, 909, 811, 753, 725 cm<sup>-1</sup>; <sup>1</sup>H NMR (400 MHz, CDCl<sub>3</sub>) δ 7.10-6.90 (m, 4 H), 3.79 (app t, 2 H, *J* = 5.2 Hz),

3.63-3.59 (m, 4 H), 3.23 (s, 2 H), 3.10 (app t, 2 H,  $J = 4.8$  Hz), 3.05 (app t, 2 H,  $J = 5.2$  Hz), 2.28 (s, 3 H), 2.42 (s, 3 H);  $^{13}\text{C}$  NMR (125 MHz,  $\text{CDCl}_3$ )  $\delta$  167.5, 166.8, 159.7, 155.7 (d,  $J_{\text{C-F}} = 245.0$  Hz), 139.4 (d,  $J_{\text{C-F}} = 8.8$  Hz), 124.5 (d,  $J_{\text{C-F}} = 3.8$  Hz), 123.3 (d,  $J_{\text{C-F}} = 8.8$  Hz), 119.2 (d,  $J_{\text{C-F}} = 2.5$  Hz), 116.3 (d,  $J_{\text{C-F}} = 20.0$  Hz), 109.7, 50.7 (d,  $J_{\text{C-F}} = 2.5$  Hz), 50.3 (d,  $J_{\text{C-F}} = 2.5$  Hz), 46.6, 41.9, 32.1, 23.7, 11.1, 10.2; HRMS (ESI)  $m/z$  calcd for  $\text{C}_{18}\text{H}_{23}\text{N}_3\text{O}_2\text{FS}$  ( $[\text{M}+\text{H}]^+$ ) 364.1490, found 364.1474.

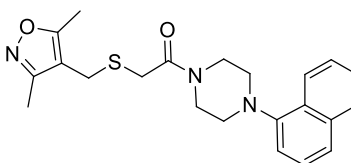

**2-(((3,5-Dimethylisoxazol-4-yl)methyl)thio)-1-(4-(naphthalen-1-yl)piperazin-1-**

**yl)ethanone (5g).** A Schlenk flask was charged under  $\text{N}_2$  with piperazine (0.0500 g, 0.580 mmol),  $\text{NaO-}t\text{-Bu}$  (0.100 g, 1.06 mmol), (*rac*)-BINAP (0.0051 g, 0.0079 mmol),  $\text{Pd}_2(\text{dba})_3$  (0.0050 g, 0.0053 mmol), and degassed toluene (5 mL). After addition of 1-bromonaphthalene (75  $\mu\text{L}$ , 0.530 mmol), the reaction mixture was heated at 110  $^\circ\text{C}$  for 24 h, cooled to room temperature, diluted with  $\text{CH}_2\text{Cl}_2$ , filtered through Celite, and concentrated *in vacuo*. The resulting 1-(naphthalen-1-yl)piperazine (**4g**) was used without further purification for the next reaction.

To a solution of (((3,5-dimethylisoxazol-4-yl)methyl)thio)acetic acid (**3a**, 0.0580 g, 0.272 mmol) in  $\text{CH}_2\text{Cl}_2$  (4 mL) was added 1-(naphthalen-1-yl)piperazine **4g** (0.0750 g, 0.353 mmol) and  $\text{Et}_3\text{N}$  (114  $\mu\text{L}$ , 0.815 mmol). The reaction mixture was cooled to 0  $^\circ\text{C}$ , treated with T3P (50 wt.% solution in  $\text{EtOAc}$ , 288  $\mu\text{L}$ , 0.408 mmol), allowed to warm to room temperature, stirred for 20 h, diluted with  $\text{CH}_2\text{Cl}_2$ , and washed with satd. aqueous  $\text{NH}_4\text{Cl}$ , satd. aqueous  $\text{NaHCO}_3$ , and brine, dried ( $\text{Na}_2\text{SO}_4$ ), filtered, and concentrated *in vacuo*. The crude residue was purified by chromatography on  $\text{SiO}_2$  (95:5  $\text{CH}_2\text{Cl}_2/\text{MeOH}$ ) to give **5g** (0.0700 g, 0.177 mmol, 65% 2 steps, 99.9% pure by ELSD) as a yellow oil: IR (neat) 2919, 1637, 1435, 1398, 1215, 1192  $\text{cm}^{-1}$ ;  $^1\text{H}$  NMR (500 MHz,  $\text{CDCl}_3$ )  $\delta$  8.21 (d, 1 H,  $J = 7.5$  Hz), 7.85 (d, 1 H,  $J = 7.5$  Hz), 7.61 (d, 1 H,  $J = 8.0$  Hz), 7.54-7.49 (m, 2 H), 7.42 (d, 1 H,  $J = 8.0$  Hz), 7.08 (d, 1 H,  $J = 7.5$  Hz), 3.73-3.66 (m, 4 H), 3.64 (s, 2 H), 3.28 (s, 2 H), 3.27-2.85 (m, 4 H), 2.45 (s, 3 H), 2.32 (s, 3 H);  $^{13}\text{C}$  NMR (125 MHz,  $\text{CDCl}_3$ )  $\delta$  167.6, 166.8, 159.7, 148.7, 134.7, 128.7, 128.5, 126.0, 125.7 (2 C), 124.2, 123.0, 115.0, 109.7,

52.9, 52.7, 47.0, 42.4, 32.1, 23.7, 11.1, 10.2; HRMS (ESI)  $m/z$  calcd for  $C_{22}H_{26}N_3O_2S$  ( $[M+H]^+$ ) 396.1746, found 396.1740.

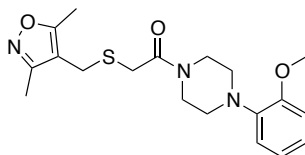

**2-(((3,5-Dimethylisoxazol-4-yl)methyl)thio)-1-(4-(2-methoxyphenyl)piperazin-1-yl)ethanone (5h).** To a solution of 2-(((3,5-dimethylisoxazol-4-yl)methyl)thio)acetic acid (**3a**, 0.0200 g, 0.0994 mmol) in  $CH_2Cl_2$  (1.25 mL) was added 1-(*o*-methoxyphenyl)piperazine (**4h**, 0.0230 g, 0.119 mmol) and  $Et_3N$  (41  $\mu$ L, 0.298 mmol). The reaction mixture was cooled to 0  $^{\circ}C$ , treated with T3P (50 wt.% solution in EtOAc, 105  $\mu$ L, 0.149 mmol), warmed to room temperature, stirred for 2 d, diluted with  $CH_2Cl_2$  and washed with satd. aqueous  $NH_4Cl$ , satd. aqueous  $NaHCO_3$ , and brine, dried ( $Na_2SO_4$ ), filtered, and concentrated *in vacuo*. The crude residue was purified by chromatography on  $SiO_2$  (ISCO, 12 g column, liquid load in  $CH_2Cl_2$ , EtOAc/hexanes gradient (10-100%, eluted at 50-70%) to give **5h** (0.0195 g, 0.0519 mmol, 52%, 100% pure by ELSD) as a colorless solid: Mp 91-93  $^{\circ}C$ ; IR (ATR) 2997, 2926, 2812, 1626, 1500, 1447, 1243, 1223, 1143, 1023, 979, 751, 741, 726  $cm^{-1}$ ;  $^1H$  NMR (300 MHz,  $CDCl_3$ )  $\delta$  7.06-7.01 (m, 1 H), 6.95-6.87 (m, 3 H), 3.87 (s, 3 H), 3.80 (app t, 2 H,  $J = 5.0$  Hz), 3.64-3.62 (m, 4 H), 3.23 (s, 2 H), 3.07 (app t, 2 H,  $J = 5.0$  Hz), 3.03 (app t, 2 H,  $J = 5.0$  Hz), 2.41 (s, 3 H), 2.28 (s, 3 H);  $^{13}C$  NMR (75 MHz,  $CDCl_3$ )  $\delta$  167.4, 166.7, 159.8, 152.2, 140.4, 123.6, 121.0, 118.4, 111.3, 109.7, 55.4, 50.7, 50.5, 46.7, 42.0, 32.1, 23.7, 11.0, 10.1; HRMS (ESI)  $m/z$  calcd for  $C_{19}H_{26}N_3O_2S$  ( $[M+H]^+$ ) 376.1689, found 376.1673.

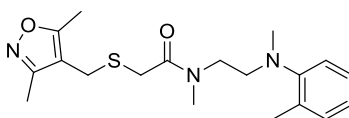

**2-(((3,5-Dimethylisoxazol-4-yl)methyl)thio)-N-methyl-N-(2-(methyl(*o*-tolyl)amino)ethyl) acetamide (5i).** To a solution of 2-(((3,5-dimethylisoxazol-4-yl)methyl)thio)acetic acid (**3a**, 0.0608 g, 0.302 mmol) in  $CH_2Cl_2$  (3.0 mL) was added

*N,N'*-dimethyl-*N*-(*o*-tolyl)ethane-1,2-diamine (**4i**, 0.0500 g, 0.275 mmol) and Et<sub>3</sub>N (115 μL, 0.825 mmol). The reaction mixture was cooled to 0 °C, treated with T3P (50 wt.% solution in EtOAc, 292 μL, 0.412 mmol), warmed to room temperature, stirred for 20 h, diluted with CH<sub>2</sub>Cl<sub>2</sub>, and washed with satd. aqueous NH<sub>4</sub>Cl solution, satd. aqueous NaHCO<sub>3</sub> solution, and brine, dried (Na<sub>2</sub>SO<sub>4</sub>), filtered, and concentrated *in vacuo*. The crude residue was purified by chromatography on SiO<sub>2</sub> (3:2, EtOAc/hexanes, base washed with 0.1% Et<sub>3</sub>N prior to use) to give **5i** (0.0752 g, 0.207 mmol, 75%, 99.6% pure by ELSD) as a light yellow oil: IR (ATR) 2932, 2795, 1640, 1598, 1493, 1451, 1421, 1393, 1196, 1108, 1047, 766, 738 cm<sup>-1</sup>; <sup>1</sup>H NMR (400 MHz, CDCl<sub>3</sub>, room temperature, mixture of rotamers coalescing in DMSO-d<sub>6</sub> at 357 K) δ 7.20-7.12 (m, 2 H), 7.07-6.95 (m, 2 H), 3.59, 3.58 (2s, 2 H), 3.54 (t, 1 H, *J* = 6.6 Hz), 3.39 (t, 1 H, *J* = 6.6 Hz), 3.16-3.08 (m, 3 H), 2.97, 2.95 (2s, 4 H), 2.71, 2.67 (2s, 3 H), 2.38 (s, 3 H), 2.30 (s, 2 H), 2.27, 2.26 (3s, 4 H); <sup>13</sup>C NMR (125 MHz, CDCl<sub>3</sub>, room temperature, mixture of rotamers coalescing in DMSO-d<sub>6</sub> at 357 K) δ 169.2, 168.8, 166.7 (2 C), 159.7, 151.7, 150.8, 133.8, 132.9, 131.4, 131.2, 126.7, 126.5, 124.0, 123.2, 120.2, 119.9, 109.8, 53.9, 53.2, 48.4, 46.4, 43.3, 42.3, 36.7, 33.8, 32.4, 31.6, 23.7, 23.4, 18.2, 18.0, 11.0 (2 C), 10.1; HRMS (ESI) *m/z* calcd for C<sub>19</sub>H<sub>28</sub>N<sub>3</sub>O<sub>2</sub>S ([M+H]<sup>+</sup>) 362.1897, found 362.1890.

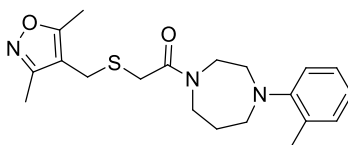

**2-(((3,5-Dimethylisoxazol-4-yl)methyl)thio)-1-(4-(*o*-tolyl)-1,4-diazepan-1-yl)ethan-1-one (**5j**)**. A solution of *tert*-butyl 4-(*o*-tolyl)-1,4-diazepane-1-carboxylate (**30a**, 0.0750 g, 0.258 mmol) in THF (0.3 mL) was cooled to 0 °C, treated with 4 M HCl in dioxane (1.6 mL) and stirred at 0 °C for 2 h. The reaction mixture was concentrated *in vacuo* and the yellow solid **4j** was precipitated in Et<sub>2</sub>O, filtered off from the solution, washed with Et<sub>2</sub>O, dried under high vacuum, and used without further purification for the next step.

To a solution of 2-(((3,5-dimethylisoxazol-4-yl)methyl)thio)acetic acid (**3a**, 0.0460 g, 0.229 mmol) in CH<sub>2</sub>Cl<sub>2</sub> (2.3 mL) was added 4-(*o*-tolyl)-1,4-diazepane hydrochloride (**4j**, 0.258 mmol) and Et<sub>3</sub>N (159 μL, 1.14 mmol). The reaction mixture was cooled to 0 °C, treated with T3P (50 wt.% solution in EtOAc, 242 μL, 0.343 mmol), warmed to room

temperature, stirred for 20 h, diluted with CH<sub>2</sub>Cl<sub>2</sub>, and washed with satd. aqueous NH<sub>4</sub>Cl solution, satd. aqueous NaHCO<sub>3</sub> solution, and brine, dried (Na<sub>2</sub>SO<sub>4</sub>), filtered, and concentrated *in vacuo*. The crude residue was purified by chromatography on SiO<sub>2</sub> (3:2, EtOAc/hexanes, base washed with 0.1% Et<sub>3</sub>N) to give **5j** (0.0854 g, 0.229 mmol, quant. 100% pure by ELSD) as a clear colorless oil: IR (ATR) 2945, 2825, 1634, 1598, 1491, 1447, 1423, 1215, 1194, 1136, 915, 762, 726 cm<sup>-1</sup>; <sup>1</sup>H NMR (400 MHz, CDCl<sub>3</sub>, room temperature, mixture of rotamers) δ 7.20 (app d, 1 H, *J* = 7.6 Hz), 7.17 (app t, 1 H, *J* = 7.6 Hz), 7.05 (app d, 1 H, *J* = 7.6 Hz), 7.01 (app dt, 1 H, *J* = 7.2, 2.0 Hz), 3.82-3.78 (m, 2 H), 3.71-3.65 (m, 4 H), 3.24-3.20 (m, 3 H), 3.15 (t, 1 H, *J* = 5.2 Hz), 3.12-3.07 (m, 2 H), 2.46 (app s, 3 H), 2.32 (2s, 6 H), 2.04 (sept, 2 H, *J* = 6.0 Hz); <sup>13</sup>C NMR (125 MHz, CDCl<sub>3</sub>, room temperature, mixture of rotamers) δ 168.9, 168.8, 166.9, 166.8, 159.8 (2 C), 153.4, 153.3, 132.9 (2 C), 131.1 (2 C), 126.7, 126.6, 123.6, 123.4, 120.8, 120.7, 109.9, 56.4, 55.8, 55.5, 54.9, 50.1, 47.6, 47.2, 44.9, 32.2, 32.0, 29.5, 28.2, 23.7, 18.5 (2 C), 11.1, 10.2 (2 C); HRMS (ESI) *m/z* calcd for C<sub>20</sub>H<sub>28</sub>N<sub>3</sub>O<sub>2</sub>S ([M+H]<sup>+</sup>) 374.1897, found 374.1883.

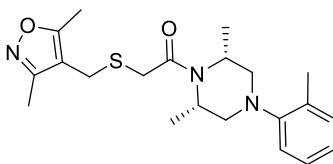

**1-(2,6-Dimethyl-4-(*o*-tolyl)piperazin-1-yl)-2-(((3,5-dimethylisoxazol-4-yl)methyl)thio)ethanone (5k).** A solution of (((3,5-dimethylisoxazol-4-yl)methyl)thio)acetic acid (**3a**, 0.0300 g, 0.142 mmol) in CH<sub>2</sub>Cl<sub>2</sub> (2 mL) was treated with 3,5-dimethyl-1-(*o*-tolyl)piperazine (**4k**, 0.0350 g, 0.170 mmol) and Et<sub>3</sub>N (59 μL, 0.425 mmol). The reaction mixture was cooled to 0 °C, treated with T3P (50 wt.% solution in EtOAc, 150 μL, 0.212 mmol), warmed to room temperature, stirred for 20 h, diluted with CH<sub>2</sub>Cl<sub>2</sub>, and washed with satd. aqueous NH<sub>4</sub>Cl, satd. aqueous NaHCO<sub>3</sub>, and brine, dried (Na<sub>2</sub>SO<sub>4</sub>), filtered, and concentrated *in vacuo*. The crude residue was purified by chromatography on SiO<sub>2</sub> (95:5 CH<sub>2</sub>Cl<sub>2</sub>/MeOH) to give **5k** (0.0450 g, 0.116 mmol, 82%, 99.8% pure by ELSD) as a light yellow oil: IR (neat) 2975, 1629, 1491, 1422, 1327, 1127 cm<sup>-1</sup>; <sup>1</sup>H NMR (500 MHz, CDCl<sub>3</sub>) δ 7.22-7.19 (m, 2 H), 7.06-7.02 (m, 2 H), 4.68 (brs, 1 H), 4.05 (brs, 1 H), 3.73-3.70 (m, 1 H), 3.66-3.61 (m, 1 H), 3.30-3.19 (m, 2 H), 2.98-2.96

(m, 2 H), 2.94-2.89 (m, 1 H), 2.81-2.78 (m, 1 H), 2.44 (s, 3 H), 2.41 (s, 3 H), 2.31 (s, 3 H), 1.55 (d, 3 H,  $J = 6.0$  Hz), 1.48 (d, 3 H,  $J = 6.0$  Hz);  $^{13}\text{C}$  NMR (125 MHz,  $\text{CDCl}_3$ )  $\delta$  168.2, 166.7, 151.2, 133.3, 131.2, 126.8, 124.1, 119.6, 109.8, 57.0, 56.8, 49.8, 45.8, 32.0, 23.6, 21.6, 20.3, 18.2, 11.0, 10.1; HRMS (ESI)  $m/z$  calcd for  $\text{C}_{21}\text{H}_{30}\text{N}_3\text{O}_2\text{S}$  ( $[\text{M}+\text{H}]^+$ ) 388.2059, found 388.2053.

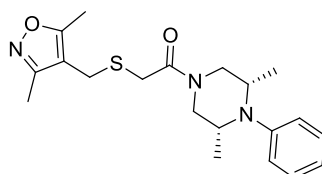

**1-(3,5-Dimethyl-4-phenylpiperazin-1-yl)-2-(((3,5-dimethylisoxazol-4-yl)methyl)thio)ethan-1-one (5I).** A solution of *tert*-butyl 3,5-dimethyl-4-phenylpiperazine-1-carboxylate (**30b**, 0.0330 g, 0.114 mmol) in THF (0.1 mL) at 0 °C was treated with 4 M HCl in dioxane (0.70 mL) and stirred at 0 °C for 1.5 h and at room temperature for 1.5 h. The yellow solid was filtered off, washed with  $\text{Et}_2\text{O}$ , dried under high vacuum and the resulting crude **4I** was directly used for the next step.

To a solution of 2-(((3,5-dimethylisoxazol-4-yl)methyl)thio)acetic acid **3a** (0.0229 g, 0.114 mmol) in  $\text{CH}_2\text{Cl}_2$  (1.1 mL) was added 2,6-dimethyl-1-phenylpiperazine hydrochloride (**4I**, 0.0258 g, 0.114 mmol) and  $\text{Et}_3\text{N}$  (79  $\mu\text{L}$ , 0.569 mmol). The reaction mixture was cooled to 0 °C, treated with T3P (50 wt.% solution in  $\text{EtOAc}$ , 121  $\mu\text{L}$ , 0.171 mmol), warmed to room temperature, stirred for 20 h, diluted with  $\text{CH}_2\text{Cl}_2$ , and washed with satd. aqueous  $\text{NH}_4\text{Cl}$  solution, satd. aqueous  $\text{NaHCO}_3$  solution, and brine, dried ( $\text{Na}_2\text{SO}_4$ ), filtered, and concentrated *in vacuo*. The crude residue was purified by chromatography on  $\text{SiO}_2$  (1:1, acetone/hexanes, base washed with 0.1%  $\text{Et}_3\text{N}$  prior to use) to give **5I** (0.0322 g, 0.0862 mmol, 76%, 100% pure by ELSD) as a colorless oil: IR (ATR) 2967, 2931, 1639, 1597, 1493, 1449, 1377, 1319, 1272, 1238, 1151, 1091, 886, 771, 731, 703  $\text{cm}^{-1}$ ;  $^1\text{H}$  NMR (400 MHz,  $\text{CDCl}_3$ )  $\delta$  7.31 (t, 2 H,  $J = 7.6$  Hz), 7.18 (t, 1 H,  $J = 7.2$  Hz), 7.10 (d, 2 H,  $J = 7.6$  Hz), 4.42 (ddd, 1 H,  $J = 12.8, 4.0, 2.4$  Hz), 3.70-3.60 (m, 3 H), 3.29-3.18 (m, 2 H), 3.10-2.93 (m, 3 H), 2.67 (dd, 1 H,  $J = 13.2, 10.4$  Hz), 2.43 (s, 3 H), 2.30 (s, 3 H), 0.77 (d, 3 H,  $J = 6.4$  Hz), 0.76 (d, 3 H,  $J = 5.6$  Hz);  $^{13}\text{C}$  NMR (100 MHz,  $\text{CDCl}_3$ )  $\delta$  167.1, 166.8, 159.7, 148.5, 128.9, 126.4, 125.6, 109.8, 56.0, 55.6, 53.4,



48.7, 31.9, 23.7, 18.2, 18.2, 11.1, 10.2; HRMS (ESI)  $m/z$  calcd for  $C_{20}H_{28}N_3O_2S$  ( $[M+H]^+$ ) 374.1897, found 374.1887.

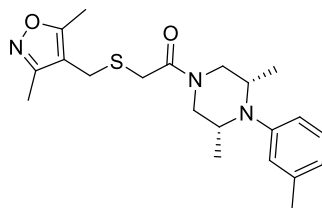

**1-(3,5-Dimethyl-4-(*m*-tolyl)piperazin-1-yl)-2-(((3,5-dimethylisoxazol-4-yl)methyl)thio)ethan-1-one (5m).** A solution of *tert*-butyl 3,5-dimethyl-4-(*m*-tolyl)piperazine-1-carboxylate (**30c**, 0.0400 g, 0.131 mmol) in THF (0.1 mL) at 0 °C was treated with 4 M HCl in dioxane (0.80 mL), and stirred at 0 °C for 1.5 h and at room temperature for 1.5 h. A yellow precipitate formed and the solid was filtered off, washed with Et<sub>2</sub>O, and dried under high vacuum and the resulting crude **4m** was used directly for the next step.

To a solution of 2-(((3,5-dimethylisoxazol-4-yl)methyl)thio)acetic acid (**3a**, 0.0264 g, 0.131 mmol) in CH<sub>2</sub>Cl<sub>2</sub> (1.3 mL) was added 2,6-dimethyl-1-(*m*-tolyl)piperazine hydrochloride (**4m**, 0.0316 g, 0.131 mmol) and Et<sub>3</sub>N (91 μL, 0.656 mmol). The reaction mixture was cooled to 0 °C, treated with T3P (50 wt. % solution in EtOAc, 139 μL, 0.197 mmol), warmed to room temperature, stirred for 20 h, diluted with CH<sub>2</sub>Cl<sub>2</sub>, washed with satd. aqueous NH<sub>4</sub>Cl solution, satd. aqueous NaHCO<sub>3</sub> solution, and brine, dried (Na<sub>2</sub>SO<sub>4</sub>), filtered, and concentrated *in vacuo*. The crude residue was purified by chromatography on SiO<sub>2</sub> (3:2, EtOAc/hexanes, base washed with 0.1% Et<sub>3</sub>N prior to use) to give **5m** (0.0400 g, 0.103 mmol, 79%, 100% pure by ELSD) as a clear colorless oil: IR (ATR) 2966, 2929, 1637, 1602, 1451, 1376, 1319, 1271, 1194, 1149, 1108, 1088, 911, 889, 788, 730, 709 cm<sup>-1</sup>; <sup>1</sup>H NMR (400 MHz, CDCl<sub>3</sub>) δ 7.18 (t, 1 H, *J* = 7.6 Hz), 6.97 (d, 1 H, *J* = 7.6 Hz), 6.90-6.88 (m, 2 H), 4.41 (app d, 1 H, *J* = 12.8 Hz), 3.64 (brs, 3 H), 3.27-3.19 (m, 2 H), 3.15-2.91 (m, 3 H), 2.67 (t, 1 H, *J* = 9.2 Hz), 2.43 (s, 3 H), 2.32 (s, 3 H), 2.30 (s, 3 H), 0.77 (br app s, 6 H); <sup>13</sup>C NMR (100 MHz, CDCl<sub>3</sub>) δ 167.1, 166.8, 159.7, 148.4, 138.7, 128.7, 127.1, 126.4, 123.4, 109.8, 56.0, 55.6, 53.4, 48.7, 32.0, 23.7, 21.4, 18.3, 18.2, 11.1, 10.2; HRMS (ESI)  $m/z$  calcd for  $C_{21}H_{30}N_3O_2S$  ( $[M+H]^+$ ) 388.2053, found 388.2046.

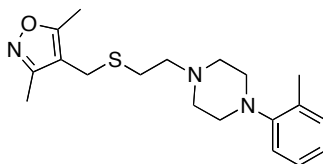

**3,5-Dimethyl-4-(((2-(4-(*o*-tolyl)piperazin-1-yl)ethyl)thio)methyl)isoxazole (6).** A solution of 2-(((3,5-dimethylisoxazol-4-yl)methyl)thio)-1-(4-(*o*-tolyl)piperazin-1-yl)ethanone (**5b**, 0.0387 g, 0.108 mmol) in THF (1 mL) at 0 °C was treated with LiAlH<sub>4</sub> (1 M solution in Et<sub>2</sub>O, 120 μL, 0.118 mmol), stirred at 0 °C for 1 h, and then quenched with Rochelle's salt (NaKC<sub>4</sub>H<sub>4</sub>O<sub>6</sub>, satd. aqueous solution, 1 mL). The mixture was stirred for an additional 1 h at 0 °C, diluted with EtOAc, extracted with EtOAc (2 x 15 mL), dried (Na<sub>2</sub>SO<sub>4</sub>), filtered, and concentrated *in vacuo*. The crude material was purified by chromatography on SiO<sub>2</sub> (ISCO, 4 g column, liquid load in CH<sub>2</sub>Cl<sub>2</sub>, 0-20% MeOH/CH<sub>2</sub>Cl<sub>2</sub>, product eluted at 5% MeOH) to give a colorless oil. This oil was further purified by chromatography on SiO<sub>2</sub> (CH<sub>2</sub>Cl<sub>2</sub> to 5:95, MeOH/CH<sub>2</sub>Cl<sub>2</sub>) on a pipette column to give **6** (0.0155 g, 0.0449 mmol, 42%, 100% pure by ELSD) as a colorless oil: IR (neat) 3393, 2925, 2814, 1637, 1599, 1493, 1448, 1424, 1372, 1227, 1195, 1130, 1041, 1006, 931, 763, 723 cm<sup>-1</sup>; <sup>1</sup>H NMR (300 MHz, CDCl<sub>3</sub>) δ 7.16 (app t, 2 H, *J* = 7.4 Hz), 7.03-6.95 (m, 2 H), 3.75 (t, 1 H, *J* = 5.7 Hz), 3.50 (s, 2 H), 2.93 (app t, 4 H, *J* = 4.5 Hz), 2.63 (brs, 8 H), 2.38 (s, 3 H), 2.30 (s, 3 H), 2.29 (s, 3 H); <sup>13</sup>C NMR (75 MHz, CDCl<sub>3</sub>) δ 165.9, 159.6, 151.4, 132.6, 131.0, 126.6, 123.2, 119.0, 110.5, 77.2, 58.1, 53.6, 51.6, 29.1, 24.0, 23.5, 17.8, 11.1, 10.2; HRMS (ESI) *m/z* calcd for C<sub>19</sub>H<sub>28</sub>ON<sub>3</sub>S ([M+H]<sup>+</sup>) 346.1948, found 346.1946.

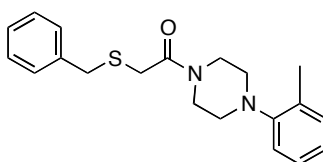

**2-(Benzylthio)-1-(4-(*o*-tolyl)piperazin-1-yl)ethanone (7).** A solution of 2-(benzylthio)acetic acid **3b** (0.0440 g, 0.241 mmol) in CH<sub>2</sub>Cl<sub>2</sub> (3.05 mL) was treated with 1-(*o*-tolyl)piperazine **4b** (0.0521 g, 0.290 mmol) and Et<sub>3</sub>N (101 μL, 0.724 mmol). The reaction mixture was cooled to 0 °C, treated with T3P (50 wt.% solution in EtOAc, 256

$\mu\text{L}$ , 0.362 mmol), warmed to room temperature and stirred for 2 d. The solution was diluted with  $\text{CH}_2\text{Cl}_2$  and washed with satd. aqueous  $\text{NH}_4\text{Cl}$ , satd. aqueous  $\text{NaHCO}_3$ , and brine, dried ( $\text{Na}_2\text{SO}_4$ ), filtered, and concentrated *in vacuo*. The crude residue was purified by chromatography on  $\text{SiO}_2$  (ISCO, 12 g column, liquid load in  $\text{CH}_2\text{Cl}_2$ , EtOAc/hexanes gradient (10-100%)) to give **7** (0.0635 g, 0.187 mmol, 77%, 100% pure by ELSD) as a yellow oil: IR (ATR) 2917, 1815, 1634, 1598, 1492, 1437, 1223, 1150, 1031, 975, 761,  $700\text{ cm}^{-1}$ ;  $^1\text{H}$  NMR (300 MHz,  $\text{CDCl}_3$ )  $\delta$  7.45-7.23 (m, 7 H), 7.06-7.01 (m, 2 H), 3.89 (s, 2 H), 3.79 (app t, 2 H,  $J = 4.9\text{ Hz}$ ), 3.59 (app t, 2 H,  $J = 4.9\text{ Hz}$ ), 3.30 (s, 2 H), 2.95-2.90 (m, 4 H), 2.37 (s, 3 H);  $^{13}\text{C}$  NMR (75 MHz,  $\text{CDCl}_3$ )  $\delta$  167.7, 150.9, 137.7, 132.8, 131.2, 129.3, 128.5, 127.2, 126.7, 123.8, 119.3, 51.9, 51.7, 46.9, 42.4, 36.3, 32.4, 17.8; HRMS (ESI)  $m/z$  calcd for  $\text{C}_{20}\text{H}_{25}\text{N}_2\text{OS}$  ( $[\text{M}+\text{H}]^+$ ) 341.1682, found: 341.1674.

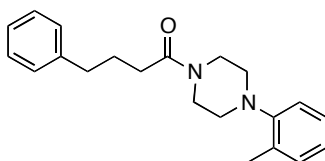

**4-Phenyl-1-(4-(*o*-tolyl)piperazin-1-yl)butan-1-one (8)**. To a solution of phenyl butanoic acid (**3c**, 0.0500 g, 0.305 mmol) in  $\text{CH}_2\text{Cl}_2$  (3.05 mL) was added 1-(*o*-tolyl)piperazine (**4b**, 0.0657 g, 0.365 mmol) and  $\text{Et}_3\text{N}$  (85  $\mu\text{L}$ , 0.609 mmol). The reaction mixture was cooled to  $0\text{ }^\circ\text{C}$ , treated with T3P (50 wt. % solution in EtOAc, 322  $\mu\text{L}$ , 0.457 mmol), warmed to room temperature, stirred overnight, diluted with  $\text{CH}_2\text{Cl}_2$  and washed with satd. aqueous  $\text{NH}_4\text{Cl}$ , satd. aqueous  $\text{NaHCO}_3$ , and brine, dried ( $\text{Na}_2\text{SO}_4$ ), filtered, and concentrated *in vacuo*. The crude residue was purified by chromatography on  $\text{SiO}_2$  (ISCO, 12 g column, liquid load in  $\text{CH}_2\text{Cl}_2$ , EtOAc/hexanes gradient (10-100%), eluted at 30%) to give **8** (0.0863 g, 0.268 mmol, 88%, 100% pure by ELSD) as a colorless oil: IR (ATR) 3024, 2917, 2813, 1641, 1492, 1432, 1223, 1150, 1025, 761,  $722\text{ cm}^{-1}$ ;  $^1\text{H}$  NMR (300 MHz,  $\text{CDCl}_3$ )  $\delta$  7.36-7.31 (m, 2 H), 7.27-7.18 (m, 5 H), 7.07-6.99 (m, 2 H), 3.80 (app t, 2 H,  $J = 4.8\text{ Hz}$ ), 3.55 (app t, 2 H,  $J = 4.8\text{ Hz}$ ), 2.88 (app t, 4 H,  $J = 4.8\text{ Hz}$ ), 2.75 (t, 2 H,  $J = 7.5\text{ Hz}$ ), 2.41 (t, 2 H,  $J = 7.5\text{ Hz}$ ), 2.36 (s, 3 H), 2.06 (ddd, 2 H,  $J = 7.9, 7.7, 7.3\text{ Hz}$ );  $^{13}\text{C}$  NMR (75 MHz,  $\text{CDCl}_3$ )  $\delta$  171.2, 150.8, 141.6, 132.6, 131.0, 128.4, 128.3, 126.6, 125.8, 123.6, 119.0, 51.9, 51.6, 45.9, 41.9, 35.2, 32.3, 26.6, 17.7; HRMS (ESI)  $m/z$  calcd for  $\text{C}_{21}\text{H}_{27}\text{N}_2\text{O}$  ( $[\text{M}+\text{H}]^+$ ) 323.2118, found: 323.2110.

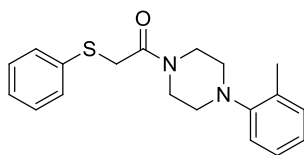

**2-(Phenylthio)-1-(4-(*o*-tolyl)piperazin-1-yl)ethan-1-one (9).** To a solution of 2-(phenylthio)acetic acid (**3d**, 0.0500 g, 0.297 mmol) in CH<sub>2</sub>Cl<sub>2</sub> (3.0 mL) was added 1-(*o*-tolyl)piperazine (**4b**, 0.0642 g, 0.357 mmol) and Et<sub>3</sub>N (83 μL, 0.594 mmol). The mixture was cooled to 0 °C, treated with T3P (50 wt.% solution in EtOAc, 315 μL, 0.446 mmol), warmed to room temperature, stirred for 3 d, diluted with CH<sub>2</sub>Cl<sub>2</sub> and washed with satd. aqueous NH<sub>4</sub>Cl, satd. aqueous NaHCO<sub>3</sub>, and brine. The organic layer was dried (Na<sub>2</sub>SO<sub>4</sub>), filtered, and concentrated *in vacuo*. The crude residue was purified by chromatography on SiO<sub>2</sub> (ISCO, 4 g column, liquid load in CH<sub>2</sub>Cl<sub>2</sub>, EtOAc/hexanes gradient (0-30%), eluted at 20-30%) to give **9** (0.0746 g, 0.229 mmol, 77%, 100% pure by ELSD) as a clear colorless oil: IR (ATR) 3057, 2947, 2911, 2856, 2815, 1639, 1598, 1492, 1482, 1382, 1275, 1223, 1203, 1149, 1115, 1032, 974, 950, 909, 762, 738, 723, 690 cm<sup>-1</sup>; <sup>1</sup>H NMR (400 MHz, CDCl<sub>3</sub>) δ 7.48 (dd, 2 H, *J* = 7.6, 1.2 Hz), 7.34 (app t, 2 H, *J* = 7.6 Hz), 7.26-7.17 (m, 3 H), 7.02 (app t, 1 H, *J* = 7.6 Hz), 6.98 (app d, 1 H, *J* = 7.6 Hz), 3.81 (s, 2 H), 3.76 (app t, 2 H, *J* = 4.8 Hz), 3.63 (app t, 2 H, *J* = 4.8 Hz), 2.91 (app t, 2 H, *J* = 4.8 Hz), 2.86 (t, 2 H, *J* = 4.8 Hz), 2.33 (s, 3 H); <sup>13</sup>C NMR (100 MHz, CDCl<sub>3</sub>) δ 167.1, 150.7, 134.9, 132.7, 131.2, 130.3, 129.1, 127.0, 126.7, 123.8, 119.2, 51.9, 51.6, 47.0, 42.5, 36.7, 17.8; HRMS (ESI) *m/z* calcd for C<sub>19</sub>H<sub>23</sub>N<sub>2</sub>OS ([M+H]<sup>+</sup>) 327.1526, found 327.1514.

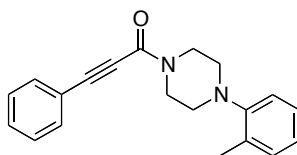

**3-Phenyl-1-(4-(*o*-tolyl)piperazin-1-yl)prop-2-yn-1-one (10).** To a solution of phenyl propiolic acid (**3e**, 0.200 g, 1.37 mmol) in CH<sub>2</sub>Cl<sub>2</sub> (12 mL) was added 1-(*o*-tolyl)piperazine (**4b**, 0.290 g, 1.6 mmol) and Et<sub>3</sub>N (570 μL, 4.1 mmol). The reaction mixture was cooled to 0 °C, treated with T3P (50 wt. % solution in EtOAc, 1.4 mL, 2.0 mmol), warmed to room temperature, stirred for 3 d, diluted with CH<sub>2</sub>Cl<sub>2</sub> (30 mL), and

washed with satd. aqueous  $\text{NH}_4\text{Cl}$  (5 mL), satd. aqueous  $\text{NaHCO}_3$  (5 mL), and brine (5 mL), dried ( $\text{Na}_2\text{SO}_4$ ), filtered, and concentrated *in vacuo*. The crude residue was purified by chromatography on  $\text{SiO}_2$  (ISCO, 24 g column, liquid load in  $\text{CH}_2\text{Cl}_2$ , EtOAc/hexanes gradient (10-100%), product eluted at 40% EtOAc/hexanes) to give **10** (0.401 g, 96%, >99.9% pure by ELSD) as a colorless solid: Mp 127-129 °C; IR (neat) 3037, 2907, 2857, 2206, 1616, 1491, 1424, 1279, 1226, 1207, 1035, 923, 758, 726, 686  $\text{cm}^{-1}$ ;  $^1\text{H}$  NMR (300 MHz,  $\text{CDCl}_3$ )  $\delta$  7.59-7.56 (m, 2 H), 7.43-7.34 (m, 3 H), 7.22-7.16 (m, 2 H), 7.05-6.99 (m, 2 H), 3.99 (app t, 2 H,  $J = 5.0$  Hz), 3.85 (app t, 2 H,  $J = 5.0$  Hz), 2.99 (app t, 2 H,  $J = 5.0$  Hz), 2.92 (app t, 2 H,  $J = 5.0$  Hz), 2.35 (s, 3 H);  $^{13}\text{C}$  NMR (75 MHz,  $\text{CDCl}_3$ )  $\delta$  153.2, 150.8, 132.8, 132.4, 131.2, 130.1, 128.6, 126.8, 123.9, 120.5, 119.3, 90.9, 81.2, 52.2, 51.5, 47.7, 42.1, 17.8; HRMS (ESI)  $m/z$  calcd for  $\text{C}_{20}\text{H}_{21}\text{ON}_2$  ( $[\text{M}+\text{H}]^+$ ) 305.1648, found 305.1643.

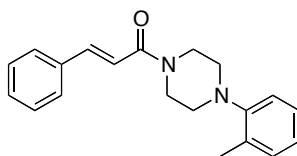

**(E)-3-Phenyl-1-(4-(o-tolyl)piperazin-1-yl)prop-2-en-1-one (11)**. A solution of *trans*-cinnamic acid (**3f**, 0.0400 g, 0.270 mmol) in  $\text{CH}_2\text{Cl}_2$  (2.5 mL) was treated with 1-(*o*-tolyl)piperazine (**4b**, 0.0570 g, 0.320 mmol),  $\text{Et}_3\text{N}$  (113  $\mu\text{L}$ , 0.810 mmol). The reaction mixture was cooled to 0 °C, treated with T3P (50 wt.% solution in EtOAc, 290  $\mu\text{L}$ , 0.405 mmol), warmed to room temperature, stirred for 3 d, diluted with  $\text{CH}_2\text{Cl}_2$  (10 mL), and washed with satd. aqueous  $\text{NH}_4\text{Cl}$  (2 mL), satd. aqueous  $\text{NaHCO}_3$  (2 mL), and brine (2 mL), dried ( $\text{Na}_2\text{SO}_4$ ), filtered, and concentrated *in vacuo*. The crude residue was purified by chromatography on  $\text{SiO}_2$  (ISCO, 12 g column, liquid load in  $\text{CH}_2\text{Cl}_2$ , EtOAc/hexanes gradient (10-100%), product eluted at 35%) to give **11** (0.0520 g, 0.168 mmol, 62%, >99% purity by ELSD) as a yellow solid: Mp 110-111 °C; IR (neat) 3045, 2920, 2840, 1643, 1595, 1423, 1327, 1225, 1152, 986, 765, 710, 682  $\text{cm}^{-1}$ ;  $^1\text{H}$  NMR (400 MHz,  $\text{CDCl}_3$ )  $\delta$  7.72 (d, 1 H,  $J = 11.4$  Hz), 7.55 (dd, 2 H,  $J = 6.8, 1.4$  Hz), 7.41-7.36 (m, 3 H), 7.20 (dd, 2 H,  $J = 14.6, 7.4$  Hz), 7.02 (ddd, 2 H,  $J = 14.6, 7.4, 0.6$  Hz), 6.95 (d, 1 H,  $J = 15.6$  Hz), 3.90 (brs, 2 H), 3.81 (brs, 2 H), 2.96 (brs, 4 H), 2.36 (s, 3 H);  $^{13}\text{C}$  NMR (75 MHz,  $\text{CDCl}_3$ )  $\delta$  165.5, 150.8, 142.8, 135.2, 132.7, 131.1, 129.6, 128.8, 127.7, 126.6,

123.7, 119.2, 117.1, 52.1, 51.6, 46.4, 42.6, 17.8; HRMS (ESI)  $m/z$  calcd for  $C_{20}H_{23}ON_2$  ( $[M+H]^+$ ) 307.1805, found 307.1796.

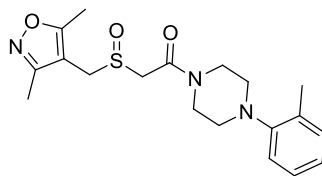

**2-(((3,5-Dimethylisoxazol-4-yl)methyl)sulfinyl)-1-(4-(*o*-tolyl)piperazin-1-yl)ethan-1-one (12).** To a solution of 2-(((3,5-dimethylisoxazol-4-yl)methylthio)-1-(4-(*o*-tolyl)piperazin-1-yl)ethanone (**5b**, 0.0500 g, 0.139 mmol) in MeOH (0.30 mL) at 0 °C was added dropwise a solution of sodium metaperiodate (0.0301 g, 0.139 mmol) in water (0.14 mL). The resulting heterogeneous mixture was allowed to warm to room temperature and stirred for 15 h. The reaction mixture was filtered through a plug of Celite (MeOH), concentrated, dissolved in  $CH_2Cl_2$ , dried ( $MgSO_4$ ), filtered and concentrated *in vacuo*. The crude residue was purified by chromatography on  $SiO_2$  (100% EtOAc) to give **12** (0.0356 g, 0.0948 mmol, 68%, 100% pure by ELSD) as a colorless foam: IR (ATR) 2917, 2818, 1631, 1599, 1493, 1441, 1384, 1275, 1224, 1195, 1151, 1053, 1028, 911, 764, 727  $cm^{-1}$ ;  $^1H$  NMR (400 MHz,  $CDCl_3$ )  $\delta$  7.21-7.15 (m, 2 H), 7.02 (app t, 1 H,  $J = 7.2$  Hz), 6.97 (app d, 1 H,  $J = 8.0$  Hz), 4.18 (d, 1 H,  $J = 14.0$  Hz), 3.90-3.84 (m, 5 H), 3.64 (app t, 2 H,  $J = 4.4$  Hz), 2.95 (app t, 2 H,  $J = 4.4$  Hz), 2.85 (brs, 2 H), 2.45 (s, 3 H), 2.32 (s, 3 H), 2.31 (s, 3 H);  $^{13}C$  NMR (100 MHz,  $CDCl_3$ )  $\delta$  169.2, 162.9, 159.9, 150.4, 132.7, 131.2, 126.7, 124.0, 119.2, 104.5, 53.7, 52.0, 51.5, 47.0, 46.8, 42.5, 17.7, 11.6, 10.3; HRMS (ESI)  $m/z$  calcd for  $C_{19}H_{26}N_3O_3S$  ( $[M+H]^+$ ) 376.1689, found 376.1684.

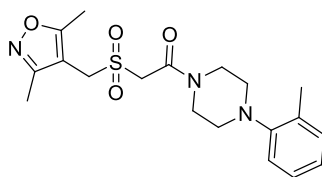

**2-(((3,5-Dimethylisoxazol-4-yl)methyl)sulfonyl)-1-(4-(*o*-tolyl)piperazin-1-yl)ethan-1-one (13).** A solution of 2-(((3,5-dimethylisoxazol-4-yl)methylthio)-1-(4-(*o*-tolyl)piperazin-1-yl)ethanone (**5b**, 0.0429 g, 0.117 mmol) in  $CH_2Cl_2$  (0.65 mL) was

treated with 3-chloroperoxybenzoic acid (70 wt.%, 0.0576 g, 0.234 mmol) in 2 portions. The reaction mixture was stirred at room temperature for 15 h, quenched with 10% aqueous sodium metabisulfite solution (2 mL), diluted with aqueous 1 M NaOH (10 mL) and extracted with CH<sub>2</sub>Cl<sub>2</sub> (2 × 15 mL). The combined organic layers were washed with 1 M NaOH (10 mL), dried (MgSO<sub>4</sub>), filtered, and concentrated *in vacuo*. The crude residue was purified by chromatography on SiO<sub>2</sub> (70-100% EtOAc/hexanes) to give **13** (0.0203 g, 0.0519 mmol, 44%, 100% pure by ELSD) as a colorless foam: IR (ATR) 2919, 2819, 1641, 1599, 1493, 1445, 1318, 1225, 1150, 1126, 1030, 911, 765, 728 cm<sup>-1</sup>; <sup>1</sup>H NMR (400 MHz, CDCl<sub>3</sub>) δ 7.21-7.16 (m, 2 H), 7.05-6.98 (m, 2 H), 4.36 (s, 2 H), 4.09 (s, 2 H), 3.85 (app brs, 2 H), 3.72 (brt, 2 H, *J* = 4.0 Hz), 3.00 (brt, 2 H, *J* = 4.0 Hz), 2.93 (brt, 2 H, *J* = 4.4 Hz), 2.50 (s, 3 H), 2.35 (s, 3 H), 2.33 (s, 3 H); <sup>13</sup>C NMR (100 MHz, CDCl<sub>3</sub>) δ 170.1, 160.7, 160.3, 150.3, 132.7, 131.2, 126.7, 124.0, 119.2, 101.8, 54.9, 51.7, 51.4, 48.3, 47.8, 43.0, 17.8, 11.5, 10.2; HRMS (ESI) *m/z* calcd for C<sub>19</sub>H<sub>26</sub>N<sub>3</sub>O<sub>4</sub>S ([M+H]<sup>+</sup>) 392.1639, found 392.1633.

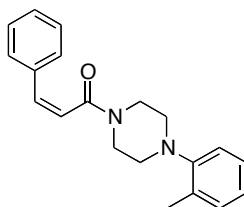

**(Z)-3-Phenyl-1-(4-(*o*-tolyl)piperazin-1-yl)prop-2-en-1-one (14).** To a solution of 3-phenyl-1-(4-(*o*-tolyl)piperazin-1-yl)prop-2-yn-1-one (**10**, 0.103 g, 0.337 mmol) in MeOH (2 mL) and EtOAc (1 mL) was added Lindlar's catalyst (5% Pd on CaCO<sub>3</sub>, lead poisoned, 0.120 g) and quinoline (15 μL, 0.130 mmol). The reaction mixture was purged and backfilled with H<sub>2</sub> (balloon, 2 x), allowed to stir for 45 min, filtered through SiO<sub>2</sub>, and concentrated *in vacuo*. The crude residue was purified by chromatography on SiO<sub>2</sub> (ISCO, modified dry load in CH<sub>2</sub>Cl<sub>2</sub>, 0-90% EtOAc/hexanes gradient, product eluted at 25% EtOAc/hexanes) to give **14** (0.104 g, 0.339 mmol, quant., 99.6% purity by ELSD) as a yellow oil: IR (neat) 3022, 2914, 2815, 1513, 1597, 1493, 1434, 1364, 1223, 1149, 1115, 1034, 973, 913, 855, 762, 722, 698 cm<sup>-1</sup>; <sup>1</sup>H NMR (300 MHz, CDCl<sub>3</sub>) δ 7.41-7.30 (m, 5 H), 7.17-7.11 (m, 2 H), 6.98 (t, 1 H, *J* = 7.1 Hz), 6.81 (d, 1 H, *J* = 7.8 Hz), 6.71 (d, 1 H, *J* = 12.6 Hz), 6.07 (d, 1 H, *J* = 12.6 Hz), 3.81 (app brt, 2 H, *J* = 4.8 Hz), 3.48 (app t,

2 H,  $J = 4.8$  Hz), 2.81 (app t, 2 H,  $J = 4.8$  Hz), 2.44 (app t, 2 H,  $J = 4.8$  Hz), 2.25 (s, 3 H);  $^{13}\text{C}$  NMR (75 MHz,  $\text{CDCl}_3$ )  $\delta$  167.6, 150.9, 135.6, 133.5, 132.7, 131.1, 128.7, 128.6, 128.5, 126.6, 123.7, 123.2, 119.1, 51.5, 51.3, 46.8, 41.7, 17.7; HRMS (ESI)  $m/z$  calcd for  $\text{C}_{20}\text{H}_{23}\text{ON}_2$  ( $[\text{M}+\text{H}]^+$ ) 307.1805, found 307.1800.

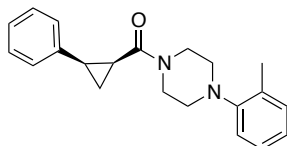

**((1SR,2RS)-2-Phenylcyclopropyl)(4-(*o*-tolyl)piperazin-1-yl)methanone (15).** A solution of anhydrous  $\text{CrCl}_2$  (0.0486 g, 0.392 mmol) in THF (0.6 mL) at room temperature under  $\text{N}_2$  was treated with a solution of (*Z*)-3-phenyl-1-(4-(*o*-tolyl)piperazin-1-yl)prop-2-en-1-one (**14**, 0.0200 g, 0.0653 mmol) in THF (0.5 mL) and  $\text{CH}_2\text{I}_2$  (20  $\mu\text{L}$ , 0.261 mmol). The reaction mixture was stirred for 18 h at reflux, quenched by addition of 1 M aqueous HCl (6 mL) and extracted with EtOAc. The combined organic layers were dried ( $\text{Na}_2\text{SO}_4$ ), filtered, and concentrated *in vacuo*. The crude residue was purified by chromatography on  $\text{SiO}_2$  (4:1, EtOAc/hexanes) to give **15** (0.0120 g, 0.0375 mmol, 57%, 100% pure by ELSD) as a brown oil: IR (neat) 2920, 1638, 1491, 1457, 1340, 1223, 1028  $\text{cm}^{-1}$ ;  $^1\text{H}$  NMR (400 MHz,  $\text{CDCl}_3$ )  $\delta$  7.30-7.27 (m, 2 H), 7.22-7.11 (m, 5 H), 6.98 (dt, 1 H,  $J = 7.2, 1.2$  Hz), 6.72 (dd, 1 H,  $J = 7.9, 0.8$  Hz), 3.93-3.90 (m, 1 H), 3.77-3.73 (m, 1 H), 3.60-3.53 (m, 1 H), 3.30-3.22 (m, 1 H), 2.75-2.72 (m, 2 H), 2.50-2.41 (m, 1 H), 2.26 (s, 3 H), 2.24-2.16 (m, 1 H), 2.10-2.00 (m, 1 H), 1.87 (dd, 1 H,  $J = 12.4, 5.8$  Hz), 1.40-1.33 (m, 1 H), 0.92-0.80 (m, 1 H);  $^{13}\text{C}$  NMR (100 MHz,  $\text{CDCl}_3$ )  $\delta$  167.2, 150.9, 137.6, 132.7, 131.0, 128.2, 127.4, 126.5, 126.4, 123.6, 119.2, 51.9, 51.6, 45.7, 42.3, 24.4, 24.1, 17.7, 10.6; HRMS (ESI)  $m/z$  calcd for  $\text{C}_{21}\text{H}_{25}\text{ON}_2$  ( $[\text{M}+\text{H}]^+$ ) 321.1967, found 321.1961.

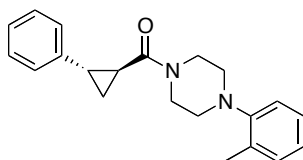

**((1SR,2SR)-2-Phenylcyclopropyl)(4-(*o*-tolyl)piperazin-1-yl)methanone (16).** To a solution of *trans*-2-phenylcyclopropanecarboxylic acid (**3g**, 0.0400 g, 0.247 mmol) in  $\text{CH}_2\text{Cl}_2$  (2.5 mL) was treated with 1-(*o*-tolyl)piperazine (**4b**, 0.0540 g, 0.296 mmol),  $\text{Et}_3\text{N}$



(100  $\mu$ L, 0.740 mmol). The reaction mixture was cooled to 0  $^{\circ}$ C, treated with T3P (50 wt.% solution in EtOAc, 260  $\mu$ L, 0.370 mmol, 1.5 equiv), warmed to room temperature, stirred for 3 d, diluted with EtOAc (10 mL), and washed with satd. aqueous  $\text{NH}_4\text{Cl}$  (2 mL), satd. aqueous  $\text{NaHCO}_3$  (2 mL), and brine (2 mL), dried ( $\text{Na}_2\text{SO}_4$ ), filtered, and concentrated *in vacuo*. The crude residue was purified by chromatography on  $\text{SiO}_2$  (ISCO, 12 g column, liquid load in  $\text{CH}_2\text{Cl}_2$ , EtOAc/hexanes gradient (10-90%), product eluted at 20%) to give **16** (0.0676 g, 0.211 mmol, 86%, >99.9% pure by ELSD) as a yellow oil: IR (neat) 3026, 2912, 2814, 1631, 1600, 1493, 1440, 1381, 1223, 1150, 1033, 919, 910, 760, 723, 696  $\text{cm}^{-1}$ ;  $^1\text{H}$  NMR (300 MHz,  $\text{CDCl}_3$ )  $\delta$  7.32-7.26 (m, 2 H), 7.23-7.12 (m, 5 H), 7.01 (dd, 2 H,  $J = 11.1, 7.5$  Hz), 3.79 (brs, 4 H), 2.90 (brs, 4 H), 2.52 (brpent, 1 H,  $J = 4.6$  Hz), 2.33 (s, 3 H), 2.02 (pent, 1 H,  $J = 4.6$  Hz), 1.71 (pent, 1 H,  $J = 4.6$  Hz), 1.34-1.26 (m, 2 H);  $^{13}\text{C}$  NMR (100 MHz,  $\text{CDCl}_3$ )  $\delta$  170.6, 150.9, 141.0, 132.7, 131.2, 128.6, 126.7, 126.3, 126.1, 123.8, 119.2, 52.2, 51.7, 46.2, 25.6, 23.3, 17.9, 16.2; HRMS (ESI)  $m/z$  calcd for  $\text{C}_{21}\text{H}_{25}\text{ON}_2$  ( $[\text{M}+\text{H}]^+$ ) 321.1961, found 321.1957.

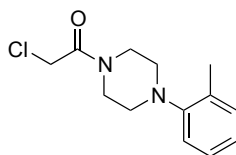

**2-Chloro-1-(4-(*o*-tolyl)piperazin-1-yl)ethanone (17a).**<sup>1,2</sup> To a solution of chloroacetyl chloride (0.698 g, 6.05 mmol) and potassium carbonate (1.14 g, 8.25 mmol) in THF (7.0 mL) was added 1-(*o*-tolyl)piperazine (**4b**, 1.00 g, 5.50 mmol) in THF (12.6 mL) at 0  $^{\circ}$ C. The reaction mixture was gradually warmed to room temperature, stirred for 16 h, diluted with water, and extracted with EtOAc (3 x 20 mL). The combined organic extracts were washed sequentially with satd. aqueous  $\text{NaHCO}_3$ , 0.1 M aqueous  $\text{HCl}$ , and brine, dried ( $\text{Na}_2\text{SO}_4$ ), filtered and concentrated *in vacuo*. The crude solid was filtered through a plug of  $\text{SiO}_2$  (3:7, EtOAc/hexanes v/v 1%  $\text{Et}_3\text{N}$ ) and washed thoroughly with EtOAc/hexanes (3:7) to give **17a** (1.37 g, 5.42 mmol, 99%) as an off white solid:  $^1\text{H}$  NMR (400 MHz,  $\text{CDCl}_3$ )  $\delta$  7.22-7.16 (m, 2 H), 7.05-6.99 (m, 2 H), 4.12 (s, 2 H), 3.78 (app t, 2 H,  $J = 4.8$  Hz), 3.67 (app t, 2 H,  $J = 4.8$  Hz), 2.97 (app t, 2 H,  $J = 4.8$  Hz), 2.91 (app t, 2 H,  $J = 4.8$  Hz), 2.33 (s, 3 H).

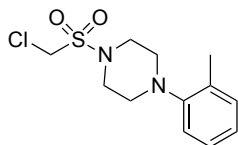

**1-((Chloromethyl)sulfonyl)-4-(*o*-tolyl)piperazine (17b).**<sup>3</sup> To a solution of 1-(*o*-tolyl)piperazine (**4b**, 0.500 g, 2.75 mmol) in CH<sub>2</sub>Cl<sub>2</sub> (9.8 mL) and Et<sub>3</sub>N (0.390 mL, 2.75 mmol) at 0 °C was added chloromethanesulfonyl chloride (0.460 g, 3.03 mmol). The reaction mixture was stirred at 0 °C, gradually warmed to room temperature quenched after 14 h with satd. aqueous NH<sub>4</sub>Cl solution (3 mL), and extracted with EtOAc (3 x 20 mL). The combined organic extracts were washed water (2 x 10 mL) and brine (10 mL), dried (Na<sub>2</sub>SO<sub>4</sub>), filtered and concentrated *in vacuo*. The crude solid was filtered through a plug of SiO<sub>2</sub> (3:7, EtOAc/hexanes containing 1% Et<sub>3</sub>N) and washed thoroughly with EtOAc/hexanes (3:7). The combined filtrates were concentrated *in vacuo* to give **17b** (0.676 g, 2.34 mmol, 85%) as an orange solid: <sup>1</sup>H NMR (300 MHz, CDCl<sub>3</sub>) δ 7.19 (t, 2 H, *J* = 8.1 Hz), 7.03 (t, 2 H, *J* = 8.1 Hz), 4.56 (s, 2 H), 3.63 (app t, 4 H, *J* = 5.0 Hz), 2.99 (app t, 4 H, *J* = 5.0 Hz), 2.32 (s, 3 H); <sup>13</sup>C NMR (75 MHz, CDCl<sub>3</sub>) δ 150.6, 132.7, 131.2, 126.8, 124.1, 119.4, 54.5, 51.9, 47.1, 17.7.

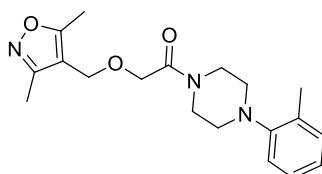

**2-((3,5-Dimethylisoxazol-4-yl)methoxy)-1-(4-(*o*-tolyl)piperazin-1-yl)ethan-1-one (18a).** A solution of (3,5-dimethylisoxazol-4-yl)methanol (**28**, 0.0302 g, 0.237 mmol) in THF (0.48 mL) was cooled to 0 °C and NaH (60% dispersion in mineral oil, 0.0190 g, 0.475 mmol) was added. The reaction mixture was stirred at 0 °C for 30 min, treated with 2-chloro-1-(4-(*o*-tolyl)piperazin-1-yl)ethanone (**17a**, 0.0600 g, 0.237 mmol), warmed to room temperature, stirred for 20 h, quenched with brine (1 mL), diluted with EtOAc (15 mL) and brine (5 mL), and extracted with EtOAc (2 × 15 mL). The combined organic layers were dried (Na<sub>2</sub>SO<sub>4</sub>) and concentrated *in vacuo*. The crude residue was purified by chromatography on SiO<sub>2</sub> (3:2, EtOAc/hexanes) to give **18a** (0.0735 g, 0.214 mmol, 90%, 100% pure by ELSD) as a light yellow oil: IR (ATR) 2918, 2817, 1645, 1599, 1493, 1443, 1369, 1273, 1225, 1116, 1030, 977, 764, 725 cm<sup>-1</sup>; <sup>1</sup>H NMR (400 MHz, CDCl<sub>3</sub>) δ

7.21-7.16 (m, 2 H), 7.02 (dt, 1 H,  $J = 7.6, 1.2$  Hz), 6.97 (app d, 1 H,  $J = 8.0$  Hz), 4.41 (s, 2 H), 4.17 (s, 2 H), 3.77 (brs, 2 H), 3.59 (app t, 2 H,  $J = 4.8$  Hz), 2.89 (app t, 4 H,  $J = 3.6$  Hz), 2.41 (s, 3 H), 2.32 (s, 3 H), 2.30 (s, 3 H);  $^{13}\text{C}$  NMR (125 MHz,  $\text{CDCl}_3$ )  $\delta$  167.8, 167.5, 159.8, 150.7, 132.7, 131.2, 126.7, 123.9, 119.2, 110.5, 68.7, 61.7, 52.1, 51.7, 45.6, 42.3, 17.8, 11.1, 10.1; HRMS (ESI)  $m/z$  calcd for  $\text{C}_{19}\text{H}_{26}\text{N}_3\text{O}_3$  ( $[\text{M}+\text{H}]^+$ ) 344.1969, found 344.1960.

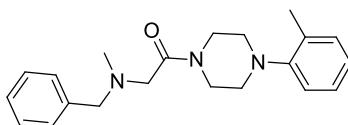

**2-(Benzyl(methyl)amino)-1-(4-(*o*-tolyl)piperazin-1-yl)ethanone (18b).** To a solution of 2-chloro-1-(4-(*o*-tolyl)piperazin-1-yl)ethanone (**17a**, 0.0534 g, 0.211 mmol), in  $\text{CH}_3\text{CN}$  (4 mL) was added *N*-methylbenzylamine (23  $\mu\text{L}$ , 0.176 mmol) and  $\text{K}_2\text{CO}_3$  (0.730 g, 0.528 mmol). The reaction mixture was heated at reflux for 5 h, cooled to room temperature, filtered, and concentrated *in vacuo*. The crude residue was purified by chromatography on  $\text{SiO}_2$  (2:3, EtOAc/hexanes) to give **18b** (0.0590 g, 0.175 mmol, 99%, >95% pure by LCMS) as a light yellow oil: IR (neat) 2933, 2816, 1640, 1450, 1491, 1222  $\text{cm}^{-1}$ ;  $^1\text{H}$  NMR (500 MHz,  $\text{CDCl}_3$ )  $\delta$  7.39-7.33 (m, 4 H), 7.31-7.27 (m, 1 H), 7.23-7.19 (m, 2 H), 7.04 (t, 1 H,  $J = 7.5$  Hz), 7.01 (d, 1 H,  $J = 8.0$  Hz), 3.77 (brs, 2 H), 3.71-3.69 (m, 2 H), 3.61 (s, 2 H), 3.27 (s, 2 H), 2.91-2.87 (m, 4 H), 2.35 (s, 3 H) 2.34 (s, 3 H);  $^{13}\text{C}$  NMR (125 MHz,  $\text{CDCl}_3$ )  $\delta$  150.9, 138.1, 132.6, 131.1, 129.1, 128.2, 127.2, 126.6, 123.6, 119.1, 62.0, 60.3, 52.1, 51.7, 46.1, 42.4, 42.2, 17.8; HRMS (ESI)  $m/z$  calcd for  $\text{C}_{21}\text{H}_{28}\text{N}_3\text{O}$  ( $[\text{M}+\text{H}]^+$ ) 338.2238, found 338.2211.

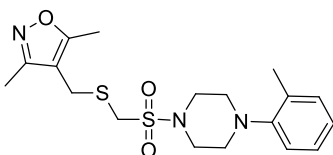

**3,5-Dimethyl-4-((((4-(*o*-tolyl)piperazin-1-yl)sulfonyl)methyl)thio)methyl)isoxazole (18c).** A suspension of NaH (60% dispersion in mineral oil, 0.0200 g, 0.499 mmol) in THF (0.6 mL) was treated under an atmosphere of  $\text{N}_2$  at 0  $^\circ\text{C}$  with a solution of (3,5-dimethylisoxazol-4-yl)methanethiol (**25**, 0.0536 g, 0.374 mmol) in THF (0.4 mL). The

reaction mixture was stirred for 10 min, treated with 1-((chloromethyl)sulfonyl)-4-(*o*-tolyl)piperazine (**17b**, 0.0360 g, 0.125 mmol), stirred for 2 d at room temperature, quenched (water) and extracted (EtOAc). The combined organic layers were dried (Na<sub>2</sub>SO<sub>4</sub>), filtered, and concentrated *in vacuo*. The residue was purified by chromatography on SiO<sub>2</sub> (1:4, EtOAc/hexanes) to give crude **18c** that was further purified by preparative TLC (2:3, Et<sub>2</sub>O/hexanes) to give **18c** (2.0 mg, 0.00506 mmol, 4%, 100% pure by ELSD) as a colorless oil: IR (neat) 2924, 1636, 1450, 1420, 1320, 1152 cm<sup>-1</sup>; <sup>1</sup>H NMR (400 MHz, CDCl<sub>3</sub>) δ 7.20 (t, 2 H, *J* = 7.7 Hz), 7.06-7.00 (m, 2 H), 3.87 (s, 2 H), 3.76 (s, 2 H), 3.58 (app t, 4 H, *J* = 4.8 Hz), 2.99 (app t, 4 H, *J* = 4.8 Hz), 2.44 (s, 3 H), 2.32 (s, 3 H), 2.31 (s, 3 H); <sup>13</sup>C NMR (100 MHz, CDCl<sub>3</sub>) δ 167.5, 159.7, 150.6, 132.7, 131.2, 126.8, 124.0, 119.4, 108.7, 51.8, 48.6, 47.0, 24.1, 17.8, 11.1, 10.2; HRMS (ESI) *m/z* calcd for C<sub>18</sub>H<sub>26</sub>O<sub>3</sub>N<sub>3</sub>S<sub>2</sub> ([M+H]<sup>+</sup>) 396.1416, found 396.1410.

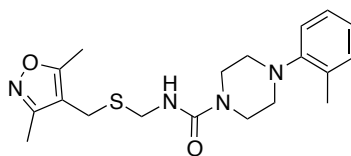

**N-(((3,5-Dimethylisoxazol-4-yl)methyl)thio)methyl-4-(*o*-tolyl)piperazine-1-carboxamide (20a).** To a solution of 2-(((3,5-dimethylisoxazol-4-yl)methyl)thio)acetic acid (**3a**, 0.0500 g, 0.248 mmol) in toluene (4.0 mL) was added DPPA (57 μL, 0.261 mmol) and Et<sub>3</sub>N (37 μL, 0.261 mmol). The reaction mixture was heated at 110 °C for 60 min, cooled and washed with satd. aqueous NaHCO<sub>3</sub>, dried (MgSO<sub>4</sub>), filtered and concentrated to give the isocyanate **19** as a pink oil that was used without further purification.

A solution of 1-(*o*-tolyl)piperazine (**4b**, 0.460 g, 0.261 mmol) and Et<sub>3</sub>N (37 μL, 0.261 mmol) in CH<sub>2</sub>Cl<sub>2</sub> (0.5 mL) was cooled to 0 °C and treated with a solution of the isocyanate **19** in CH<sub>2</sub>Cl<sub>2</sub> (0.5 mL). The reaction mixture was stirred overnight at room temperature, then diluted with EtOAc and satd. aqueous NH<sub>4</sub>Cl. The organic layer was washed with satd. aqueous NaHCO<sub>3</sub> and brine, dried (Na<sub>2</sub>SO<sub>4</sub>), filtered, and concentrated *in vacuo*. The residue was purified by chromatography on SiO<sub>2</sub> (ISCO, 4 g column, gradient hexanes to 1:1, EtOAc/hexanes, with an initial base wash of the column using hexanes containing 1% Et<sub>3</sub>N) to give **20a** (0.0606 g, 0.162 mmol, 65%, 98% pure by

ELSD) as a clear oil that turns to a red oil upon standing: IR (CH<sub>2</sub>Cl<sub>2</sub>) 3336, 2941, 2891, 2850, 1629, 1523, 1491, 1495, 1420, 1254, 1223, 1193, 997, 907, 761, 731 cm<sup>-1</sup>; <sup>1</sup>H NMR (300 MHz, CDCl<sub>3</sub>) δ 7.18 (dd, 2 H, *J* = 8.7, 7.5 Hz), 7.04-6.98 (m, 2 H), 4.88 (brt, 1 H, *J* = 6.0 Hz), 4.44 (d, 2 H, *J* = 6.0 Hz), 3.67 (s, 2 H), 3.50 (app t, 4 H, *J* = 5.0 Hz), 2.89 (app t, 4 H, *J* = 5.0 Hz), 2.39 (s, 3 H), 2.32 (s, 3 H), 2.29 (s, 3 H); <sup>13</sup>C NMR (75 MHz, CDCl<sub>3</sub>) δ 166.0, 159.5, 156.9, 150.9, 132.7, 131.2, 126.7, 123.7, 119.1, 110.8, 51.6, 44.4, 43.9, 23.6, 17.8, 11.0, 10.2; HRMS (ESI) *m/z* calcd for C<sub>19</sub>H<sub>27</sub>N<sub>4</sub>O<sub>2</sub>S ([M+H]<sup>+</sup>) 375.1849, found 375.1845.

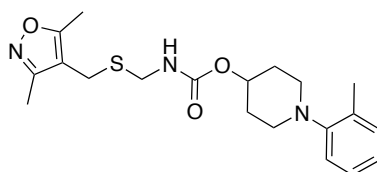

**1-(*o*-Tolyl)piperidin-4-yl(((3,5-dimethylisoxazol-4-yl)methyl)thio)methyl)carbamate (20b).** To a solution of 2-(((3,5-dimethylisoxazol-4-yl)methyl)thio)acetic acid (**3a**, 0.0500 g, 0.248 mmol) in toluene (4.0 mL) was added DPPA (0.06 mL, 0.261 mmol) and Et<sub>3</sub>N (37 μL, 0.261 mmol). The reaction mixture was heated at 110 °C for 60 min, cooled to room temperature and treated with a solution of 1-(*o*-tolyl)piperidin-4-ol (**4n**, 0.0427 g, 0.224 mmol) in CH<sub>2</sub>Cl<sub>2</sub> (0.5 mL). The reaction mixture was stirred overnight at 80 °C, and diluted with EtOAc and satd. aqueous NH<sub>4</sub>Cl. The organic layer was washed with satd. aqueous NaHCO<sub>3</sub> and brine, dried (Na<sub>2</sub>SO<sub>4</sub>), filtered, and concentrated *in vacuo*. The residue was purified by chromatography on SiO<sub>2</sub> (ISCO, 4 g column, gradient hexanes to 3:7, EtOAc/hexanes, with an initial base wash of the column with hexanes w/ 1% Et<sub>3</sub>N) to give **20b** (0.0168 g, 0.0431 mmol, 17%, 100% pure by ELSD) as a clear oil that eventually turned to a light yellow oil upon standing: IR (CH<sub>2</sub>Cl<sub>2</sub>) 3323, 2947, 2924, 2848, 2811, 1711, 1491, 1450, 1422, 1228, 1195, 1027, 762, 723 cm<sup>-1</sup>; <sup>1</sup>H NMR (400 MHz, DMSO-d<sub>6</sub>) δ 7.98 (t, 1 H, *J* = 6.4 Hz), 7.16-7.11 (m, 2 H), 7.02 (d, 1 H, *J* = 7.2 Hz), 6.94 (dt, 1 H, *J* = 7.2, 1.2 Hz), 4.72-4.69 (m, 1 H), 4.15 (d, 2 H, *J* = 6.4 Hz), 3.66 (s, 2 H), 3.01-2.98 (m, 2 H), 2.78-2.72 (m, 2 H), 2.36 (s, 3 H), 2.24 (s, 3 H), 2.18 (s, 3 H), 2.04-1.94 (m, 2 H), 1.77-1.67 (m, 2 H); <sup>13</sup>C NMR (100 MHz, DMSO-d<sub>6</sub>) δ 165.7, 159.2, 155.5, 151.5, 131.8, 130.7, 126.5, 122.8, 118.9, 110.9, 69.9, 49.2, 42.9, 31.6, 21.9, 17.4, 10.5, 9.7; HRMS (ESI) *m/z* calcd for C<sub>20</sub>H<sub>28</sub>N<sub>3</sub>O<sub>3</sub>S ([M+H]<sup>+</sup>) 390.1846, found 390.1846.

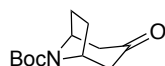

**(tert-Butyl 3-oxo-8-azabicyclo[3.2.1]octane-8-carboxylate (21a)).**<sup>4</sup> A solution of nortropinone•HCl (**21**, 2.00 g, 12.4 mmol) in a minimum amount of water (6.0 mL) was cooled to 0 °C, treated dropwise with 1 M NaOH (14.8 mL, 14.8 mmol, 1.2 equiv), warmed to room temperature over 20 min, extracted with CH<sub>2</sub>Cl<sub>2</sub> (3 x 40 mL), dried (MgSO<sub>4</sub>), filtered, and concentrated *in vacuo* (water bath at 23 °C) to give nortropinone **21** as the free base (1.54 g, quant.). The colorless oil was used without further purification

To a solution of nortropinone **21** (1.54 g, 12.3 mmol) in CH<sub>2</sub>Cl<sub>2</sub> (50 mL) cooled to 0 °C was added Boc anhydride (4.26 mL, 18.6 mmol), DMAP (0.302 g, 2.47 mmol), and Et<sub>3</sub>N (7.0 mL, 50.2 mmol). The reaction mixture was allowed to warm to room temperature and stirred overnight. After 19 h, the solvent was removed under reduced pressure, and the residue was diluted with water, extracted with EtOAc (3x), washed with brine, dried (MgSO<sub>4</sub>), filtered, and concentrated *in vacuo* to give a red sticky solid which was purified by chromatography on SiO<sub>2</sub> (CH<sub>2</sub>Cl<sub>2</sub>) to give **21a** (2.18 g, 9.68 mmol, 78% over two steps) as a pale yellow oil that solidified to an off-white solid upon standing at room temperature: <sup>1</sup>H NMR (300 MHz, DMSO-d<sub>6</sub>) δ 4.34-4.30 (m, 2 H), 2.55 (dt, 2 H, *J* = 15.6, 4.2 Hz), 2.23 (d, 2 H, *J* = 15.6 Hz), 2.20 (app s, 1 H), 2.03-1.94 (m, 2 H), 1.60-1.52 (m, 2 H), 1.44 (s, 9 H); <sup>13</sup>C NMR (75 MHz, DMSO-d<sub>6</sub>) δ 207.4, 152.6, 79.2, 52.7, 48.1, 28.0 (2 C).

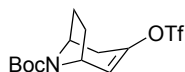

**tert-Butyl 3-(((trifluoromethyl)sulfonyl)oxy)-8-azabicyclo[3.2.1]oct-2-ene-8-carboxylate (22).**<sup>4</sup> A solution of NaHMDS (0.895 g, 4.88 mmol) in THF (12 mL) was added dropwise (over 10 min) at -78 °C to a solution of *tert*-butyl 3-oxo-8-azabicyclo[3.2.1]octane-8-carboxylate (**21a**, 1.00 g, 4.44 mmol) in THF (12 mL). The reaction mixture was stirred at -78 °C for 2 h, treated dropwise (over 20 min) with a solution of PhN(Tf)<sub>2</sub> (1.90 g, 5.33 mmol) in THF (12 mL), stirred for an additional 30 min at -78 °C and then allowed to warm to room temperature and stirred for 2 h. After

addition of 10% w/v Na<sub>2</sub>CO<sub>3</sub> (50 mL), the solution was extracted with Et<sub>2</sub>O (2 x 75 mL). The combined organic layers were washed with 10% Na<sub>2</sub>CO<sub>3</sub> solution, dried (MgSO<sub>4</sub>), and concentrated *in vacuo* to give the crude residue as a yellow oil that was purified by chromatography on SiO<sub>2</sub> (1:19, EtOAc/hexanes w/ 1% Et<sub>3</sub>N) to give **22** (1.24 g, 3.47 mmol, 78%) as a clear oil that solidified to a wax upon storage at -20 °C: <sup>1</sup>H NMR (400 MHz, CDCl<sub>3</sub>) δ 6.09 (brs, 1 H), 4.54-4.38 (m, 2 H), 3.07-3.02 (m, 1 H), 2.30-2.20 (m, 1 H), 2.11-1.99 (m, 3 H), 2.00-1.97 (m, 2 H), 1.79-1.70 (m, 1 H), 1.45 (s, 9 H).

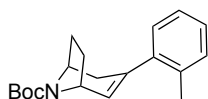

**tert-Butyl 3-(o-tolyl)-8-azabicyclo[3.2.1]oct-2-ene-8-carboxylate (23a)**. A solution of Na<sub>2</sub>CO<sub>3</sub> (0.330 g, 3.11 mmol), lithium chloride (0.0600 g, 1.41 mmol), *tert*-butyl 3-(((trifluoromethyl)sulfonyl)oxy)-8-azabicyclo[3.2.1]oct-2-ene-8-carboxylate (**22**, 0.460 g, 1.41 mmol) and *o*-tolylboronic acid (0.235 g, 1.70 mmol) in DME (11 mL) and H<sub>2</sub>O (3 mL) was sparged with N<sub>2</sub> for 1 h, and treated with Pd(PPh<sub>3</sub>)<sub>4</sub> (0.0376 g, 0.0325 mmol). The flask was evacuated and backfilled with nitrogen (3x) and the mixture was heated at 60 °C for 3 h. The mixture was allowed to cool to room temperature, diluted with brine, extracted with EtOAc (3x), dried (Na<sub>2</sub>SO<sub>4</sub>), and concentrated *in vacuo* to give a brown oil which was dry loaded onto SiO<sub>2</sub> and purified by chromatography on SiO<sub>2</sub> (hexanes to 15:1, hexanes/EtOAc) to give **23a** (0.330 g, 1.10 mmol, 78%) as a colorless solid: Mp 67.5-68.4 °C; IR (neat) 2975, 2934, 1685, 1420, 1364, 1329, 1169, 1094 cm<sup>-1</sup>; <sup>1</sup>H NMR (400 MHz, CDCl<sub>3</sub>, mixture of rotamers) δ 7.20-7.12 (m, 3 H), 7.02-7.00 (m, 1 H), 5.94-5.86 (m, 1 H), 4.50-4.30 (m, 2 H), 3.11-2.91 (m, 1 H), 2.27 (app s, 4 H), 2.10-1.90 (m, 3 H), 1.90-1.80 (m, 1 H), 1.50 (s, 9 H); <sup>13</sup>C NMR (100 MHz, CDCl<sub>3</sub>, 1:1 mixture of rotamers) δ 154.4, 141.6, 136.2, 135.5, 134.9, 131.3, 130.8, 130.7, 130.1, 129.3, 128.1, 126.9, 126.8, 125.6, 123.5, 120.0, 114.8, 79.3, 53.6, 52.9, 52.7, 52.0, 39.2, 38.4, 34.9, 34.3, 30.4, 29.6, 28.4, 19.5, 15.8; HRMS (ESI) *m/z* calcd for C<sub>14</sub>H<sub>17</sub>N ([M+H-C<sub>5</sub>H<sub>9</sub>O<sub>2</sub>]<sup>+</sup>) 200.1439, found 200.1435.

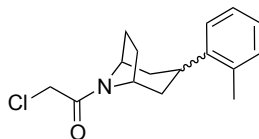

**2-Chloro-1-(3-(*o*-tolyl)-8-azabicyclo[3.2.1]octan-8-yl)ethan-1-one (24).** A solution of *tert*-butyl 3-(*o*-tolyl)-8-azabicyclo[3.2.1]oct-2-ene-8-carboxylate (**23a**, 0.196 g, 0.655 mmol) in EtOH (5.0 mL) was treated with Pd/C (5%, 0.0480 g). The flask was evacuated and flushed with H<sub>2</sub> (balloon, 3x). The reaction mixture was stirred under H<sub>2</sub> (1 atm, balloon) overnight, filtered through Celite, rinsed with EtOH and concentrated *in vacuo* to give (**23**, 0.160 g, 0.531 mmol, 81%) as a yellow liquid that was used without further purification.

A solution of **23** (0.200 g, 0.664 mmol) in CH<sub>2</sub>Cl<sub>2</sub> (5 mL) was treated at room temperature with TFA (0.30 mL, 3.98 mmol). After 16 h, the solution was concentrated *in vacuo*. The oily residue was extracted with CH<sub>2</sub>Cl<sub>2</sub>, washed with satd. aqueous NaHCO<sub>3</sub> and brine, dried (Na<sub>2</sub>SO<sub>4</sub>), filtered, and concentrated *in vacuo* to give 3-(*o*-tolyl)-8-azabicyclo[3.2.1]octane (**23b**, 0.133 g, 0.661 quant) as a light yellow oil that was used without further purification.

A solution of **23b** (0.130 g, 0.646 mmol) and Et<sub>3</sub>N (0.10 mL, 0.710 mmol) in THF (3 mL) was cooled to 0 °C and treated with chloroacetyl chloride (60 μL, 0.710 mmol) dropwise over 1 min. The reaction mixture was stirred at 0 °C for 1 h and then at room temperature for 20 h. The solution was filtered, concentrated *in vacuo* and the residue was dissolved in EtOAc, washed with water, dried (Na<sub>2</sub>SO<sub>4</sub>), filtered, and concentrated *in vacuo*. The crude residue was purified by chromatography on SiO<sub>2</sub> (1:1, hexanes/EtOAc) to give **24** (0.141 g, 0.508 mmol, 79%) as a brown oil. <sup>1</sup>H NMR analysis indicated an approximately 4:3 ratio of *endo/exo* isomers: <sup>1</sup>H NMR (400 MHz, CDCl<sub>3</sub>) δ 7.22-7.09 (m, 6.8 H), 4.85-4.80 (m, 1 H), 4.80-4.74 (m, 0.7 H), 4.38-4.30 (m, 1.7 H), 4.14-4.04 (m, 3.6 H), 3.49-3.39 (m, 1 H), 2.99-2.88 (m, 0.7 H), 2.58-2.49 (m, 1 H), 2.38 (s, 3 H), 2.32 (s, 2 H), 2.22-1.70 (m, 11 H), 1.55-1.48 (m, 1 H); <sup>13</sup>C NMR (100 MHz, CDCl<sub>3</sub>) δ 163.4, 162.1, 141.8, 141.7, 135.9, 135.0, 130.4 (2 C), 126.5, 126.4, 126.2, 126.1 (2 C), 126.0, 55.7, 55.4, 52.6, 49.6, 41.5, 41.4, 39.5, 39.1, 37.9, 37.5, 32.8, 30.9, 30.3, 29.7, 28.9, 27.1, 19.4, 19.3; HRMS (ESI) *m/z* calcd for C<sub>16</sub>H<sub>21</sub>ClNO ([M+H]<sup>+</sup>), 298.1312, found 298.1301



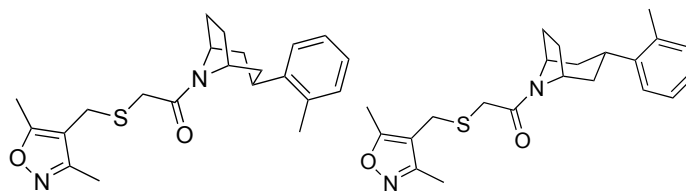**26a****26b**

**2-(((3,5-Dimethylisoxazol-4-yl)methyl)thio)-1-(3-(*o*-tolyl)-8-azabicyclo[3.2.1]octan-8-yl)ethanone (26a)** and **2-(((3,5-dimethylisoxazol-4-yl)methyl)thio)-1-(3-(*o*-tolyl)-8-azabicyclo[3.2.1]octan-8-yl)ethanone (26b)**. A solution of (3,5-dimethylisoxazol-4-yl)methanethiol (**25**, 0.0247 g, 0.172 mmol) in THF (0.4 mL) was added to a suspension of NaH (60% dispersion in mineral oil, 0.0115 g, 0. mmol) in THF (1.0 mL) at 0 °C. The resultant slurry was stirred at 0 °C for 30 min and a solution of 2-chloro-1-(3-(*o*-tolyl)-8-azabicyclo[3.2.1]octan-8-yl)ethanone (**24**, 0.0400 g, 0.144 mmol) in THF (0.4 mL) was added. The reaction mixture was allowed to warm to room temperature, stirred for 24 h, quenched with brine (1 mL), diluted with EtOAc (15 mL) and brine (5 mL), and extracted with EtOAc (2 x 15 mL). The combined organic layers were dried (Na<sub>2</sub>SO<sub>4</sub>) and concentrated *in vacuo*. The crude residue was purified by chromatography on SiO<sub>2</sub> (3:7, EtOAc/hexanes) to give **26a** (16.2 mg, 0.0421 mmol, 29%, 99.8% pure by ELSD) and **26b** (16.6 mg, 0.0432 mmol, 30%, 100% pure by ELSD) as light yellow oils.

**26a** (*dr* 82:18 by <sup>1</sup>H NMR): IR (neat) 2952, 2933, 1629, 1446, 1424, 1195 cm<sup>-1</sup>; <sup>1</sup>H NMR (400 MHz, CDCl<sub>3</sub>) δ 7.17-7.11 (m, 4 H), 4.81-4.80 (m, 1 H), 4.25-4.24 (m, 1 H), 3.72 (s, 2 H), 3.46-3.40 (m, 1 H), 3.19 (s, 2 H), 2.44 (brs, 4 H), 2.37 (s, 3 H), 2.31 (s, 3 H), 2.19-2.09 (m, 1 H), 2.08-1.84 (m, 5 H), 1.80-1.66 (m, 2 H); <sup>13</sup>C NMR (100 MHz, CDCl<sub>3</sub>) δ 166.8, 164.8, 159.8, 141.9, 135.1, 130.5, 126.5, 126.2, 126.0, 109.9, 55.8, 52.2, 39.2, 37.6, 32.5, 30.4, 28.9, 27.3, 23.8, 19.3, 11.0, 10.1; HRMS (ESI) *m/z* calcd for C<sub>22</sub>H<sub>29</sub>O<sub>2</sub>N<sub>2</sub>S ([M+H]<sup>+</sup>) 385.1950, found 385.1946.

**26b** (*dr* 92:8 by <sup>1</sup>H NMR): IR (neat) 2952, 2934, 1629, 1489, 1446, 1193, 1163 cm<sup>-1</sup>; <sup>1</sup>H NMR (400 MHz, CDCl<sub>3</sub>) δ 7.20-7.12 (m, 4 H), 4.76 (t, 1 H, *J* = 7.6 Hz), 4.20 (t, 1 H, *J* = 7.6 Hz), 3.80 (d, 1 H, *J* = 14.0 Hz), 3.62 (d, 1 H, *J* = 14.0 Hz), 3.20 (d, 1 H, *J* = 12.8 Hz), 3.10 (d, 1 H, *J* = 13.6 Hz), 3.01-2.90 (m, 1 H), 2.60-2.45 (m, 5 H), 2.40 (s, 6 H), 2.22-2.11 (m, 1 H), 2.10-2.00 (m, 1 H), 1.85-1.69 (m, 2 H), 1.55-1.40 (m, 2 H); <sup>13</sup>C NMR (100 MHz, CDCl<sub>3</sub>) δ 166.9, 166.3, 159.8, 142.0, 135.7, 130.4, 126.5, 126.2, 126.0, 109.9,

53.3, 49.3, 39.0, 38.0, 32.8, 31.9, 31.1, 29.9, 23.9, 19.5, 11.1, 10.2; HRMS (ESI)  $m/z$  calcd for  $C_{22}H_{29}O_2N_2S$  ( $[M+H]^+$ ) 385.1950, found 385.1944.

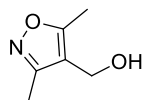

**(3,5-Dimethylisoxazol-4-yl)methanol (28).**<sup>5</sup> To a solution of 3,5-dimethylisoxazole-4-carboxylic acid (1.60 g, 11.3 mmol) in THF (69 mL) at 0 °C was added dropwise a 2 M solution of  $LiAlH_4$  in THF (5.6 mL, 11.2 mmol). The reaction mixture was allowed to warm to room temperature, stirred overnight, transferred to a 500-mL Erlenmeyer flask and treated with sodium sulfate decahydrate until the foaming subsided. Celite (2.3 g) was added and the slurry was filtered and washed with  $CH_2Cl_2$  (75 mL). The filtrate was concentrated *in vacuo* to give **28** (1.14 g, 8.97 mmol, 79%) as a clear colorless oil:  $^1H$  NMR (400 MHz,  $CDCl_3$ )  $\delta$  4.46 (s, 2 H), 2.38 (s, 3 H), 2.29 (s, 3 H).

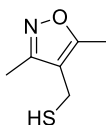

**(3,5-Dimethylisoxazol-4-yl)methanethiol (25).**<sup>6</sup> A solution of (3,5-dimethylisoxazol-4-yl)methanol (**28**, 0.500 g, 3.90 mmol) in toluene (13 mL) was treated with Lawesson's reagent (0.890 g, 2.15 mmol) at room temperature, heated to 80 °C and stirred for 1 d. The crude mixture was loaded directly onto  $SiO_2$  and purified by chromatography on  $SiO_2$  (4:1, hexanes/EtOAc) to give **25** (0.115 g, 0.803 mmol, 21%) as a light yellow oil:  $^1H$  NMR (300 MHz,  $CDCl_3$ )  $\delta$  3.49 (d, 2 H,  $J = 6.6$  Hz), 2.36 (s, 3 H), 2.30 (s, 3 H), 1.64 (t, 1 H,  $J = 6.6$  Hz);  $^{13}C$  NMR (75 MHz,  $CDCl_3$ )  $\delta$  165.2, 159.0, 113.3, 15.9, 10.9, 10.0.

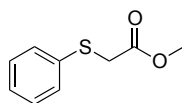

**Methyl 2-(phenylthio)acetate (29).**<sup>7</sup> A solution of thiophenol (0.10 mL, 0.977 mmol), and methyl bromoacetate (0.164 g, 1.07 mmol) in THF (13 mL) was treated with  $Et_3N$  (0.17 mL, 1.17 mmol), stirred at room temperature for 4 h, and diluted with  $Et_2O$  and satd. aqueous  $NaHCO_3$ . The aqueous layer was extracted with  $Et_2O$  (2 x 5 mL). The

combined organic layers were dried ( $\text{MgSO}_4$ ), filtered and concentrated *in vacuo* to give **29** (0.176 g, 0.966 mmol, 99%) as a clear oil:  $^1\text{H}$  NMR (300 MHz,  $\text{CDCl}_3$ )  $\delta$  7.42-7.38 (m, 2 H), 7.33-7.20 (m, 3 H), 3.71 (s, 3 H), 3.65 (s, 2 H);  $^{13}\text{C}$  NMR (75 MHz,  $\text{CDCl}_3$ )  $\delta$  170.1, 134.9, 129.9, 129.0, 127.0, 52.5, 36.5.

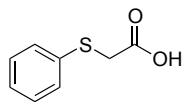

**2-(Phenylthio)acetic acid (3d)**.<sup>7,8</sup> To a solution of methyl 2-(phenylthio)acetate (**29**, 0.176 g, 0.966 mmol) in MeOH (2 mL) was added 2 M LiOH (1 mL). The reaction mixture was stirred at room temperature for 1 h and TLC analysis (4:1, hexanes/EtOAc) indicated that **29** had been consumed. The solution was concentrated *in vacuo*, diluted with water (3 mL) and acidified to pH 2 with 1 M HCl at 0 °C. The aqueous layer was extracted with EtOAc (3 x 10 mL). The combined organic layers were dried ( $\text{MgSO}_4$ ), filtered and concentrated *in vacuo* to give **3d** (0.144 g, 0.857 mmol, 89%) as a colorless solid:  $^1\text{H}$  NMR (300 MHz,  $\text{CDCl}_3$ )  $\delta$  11.27 (brs, 1 H), 7.43 (d, 2 H,  $J = 7.6$  Hz), 7.36-7.24 (m, 3 H), 3.69 (s, 2 H);  $^{13}\text{C}$  NMR (75 MHz,  $\text{CDCl}_3$ )  $\delta$  175.9, 134.4, 130.1, 129.2, 127.2, 36.6.

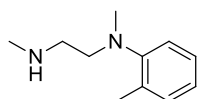

***N,N'*-Dimethyl-*N*-(*o*-tolyl)ethane-1,2-diamine (4i)**.<sup>9</sup> A microwave vial was flushed with argon and charged with the *N,N'*-dimethylethylenediamine (0.180 g, 2.04 mmol), NaO-*t*-Bu (0.202 g, 2.04 mmol), (*rac*)-BINAP (0.0162 g, 0.0260 mmol),  $\text{Pd}_2(\text{dba})_3$  (0.0078 g, 0.0085 mmol), degassed toluene (10.2 mL), and 2-bromotoluene (0.297 g, 1.70 mmol). The reaction mixture was heated in the sealed vial under argon at 110 °C for 24 h, cooled to room temperature, diluted with  $\text{CH}_2\text{Cl}_2$ , filtered through Celite, and concentrated *in vacuo*. The residue was purified by chromatography on basic  $\text{Al}_2\text{O}_3$  (95:5,  $\text{CH}_2\text{Cl}_2/\text{MeOH}$ ) to give **4i** (0.0508 g, 0.285 mmol, 17%) as a brown oil:  $^1\text{H}$  NMR (400 MHz,  $\text{CDCl}_3$ )  $\delta$  7.16 (t, 2 H,  $J = 7.6$  Hz), 7.08 (d, 1 H,  $J = 7.6$  Hz), 6.98 (d, 1 H,  $J = 7.2$  Hz), 3.05 (t, 2 H,  $J = 6.4$  Hz), 2.71 (t, 2 H,  $J = 6.4$  Hz), 2.65 (s, 3 H), 2.43 (s, 3 H), 2.32

(s, 3 H), 1.36 (brs, 1 H); HRMS (ESI)  $m/z$  calcd for  $C_{11}H_{19}N_2$  ( $[M+H]^+$ ) 179.1543, found 179.1541.

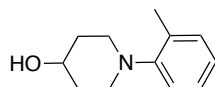

**1-(*o*-Tolyl)piperidin-4-ol (4n).**<sup>10</sup> An oven-dried microwave tube was charged with  $Pd_2(dba)_3$  (0.0606 g, 0.0653 mmol), CyJohnphos (0.0292 g, 0.0816 mmol), and 4-piperidinol (0.330 g, 3.26 mmol). The microwave tube was evacuated and back-filled with argon. A 1 M solution of  $LiN(TMS)_2$  (1.21 g, 7.17 mmol) in degassed THF (7.2 mL) was added via syringe along with 2-bromotoluene (0.600 g, 3.26 mmol). The reaction vessel was sealed and heated at 65 °C with stirring for 22 h. The reaction mixture was cooled to room temperature, quenched with 1 M HCl (10 mL), stirred at room temperature for 5 min, neutralized with a satd. aqueous  $NaHCO_3$  solution, and diluted with EtOAc. The organic layer was dried ( $MgSO_4$ ), filtered through Celite, and concentrated *in vacuo*. The residue was purified by chromatography on  $SiO_2$  (ISCO, 12 g column, gradient hexanes to 3:7, EtOAc/hexanes) to give **4n** (0.372 g, 1.94 mmol, 60%) as a brown oil:  $^1H$  NMR (300 MHz,  $CDCl_3$ )  $\delta$  7.17 (dd, 2 H,  $J = 9.3, 7.2$  Hz), 7.04-6.96 (m, 2 H), 3.87-3.81 (m, 1 H), 3.15-3.08 (m, 2 H), 2.74 (dt, 2 H,  $J = 9.6, 2.7$  Hz), 2.32 (s, 3 H), 2.06-2.00 (m, 2 H), 1.80-1.69 (m, 3 H);  $^{13}C$  NMR (75 MHz,  $CDCl_3$ )  $\delta$  151.9, 132.7, 130.9, 126.4, 123.0, 119.0, 68.0, 49.8, 35.2, 17.7; HRMS (ESI)  $m/z$  calcd for  $C_{12}H_{18}NO$  ( $[M+H]^+$ ) 192.1383, found 192.1307.

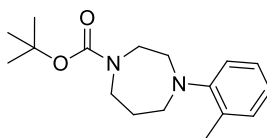

***tert*-Butyl 4-(*o*-tolyl)-1,4-diazepane-1-carboxylate (30a).** A microwave vial was flushed with argon and charged with Boc-homopiperazine (0.223 g, 1.10 mmol),  $NaO-t-Bu$  (0.116 g, 1.20 mmol), (*rac*)-BINAP (0.0478 g, 0.0752 mmol, 7.5 mol%),  $Pd_2(dba)_3$  (0.0233 g, 0.0251 mmol), degassed toluene (2.8 mL), and 2-bromotoluene (0.175 g, 1.00 mmol). The reaction mixture was heated in the sealed vial under argon at 80 °C for 19 h, cooled to room temperature, diluted with  $CH_2Cl_2$ , filtered through Celite, and

concentrated *in vacuo*. The residue was purified by chromatography on SiO<sub>2</sub> (1:9, EtOAc/hexanes) to give **30a** (0.139 g, 0.479 mmol, 48%) as a yellow oil: IR (ATR) 2973, 2828, 1689, 1598, 1491, 1457, 1411, 1364, 1233, 1215, 1156, 1122, 878, 761, 725 cm<sup>-1</sup>; <sup>1</sup>H NMR (500 MHz, CDCl<sub>3</sub>, room temperature, mixture of rotamers) δ 7.16 (d, 1 H, *J* = 6.0 Hz), 7.12 (d, 1 H, *J* = 6.0 Hz), 7.04 (d, 1 H, *J* = 7.5 Hz), 6.95 (t, 1 H, *J* = 7.0 Hz), 3.61-3.56 (m, 4 H), 3.11-3.04 (m, 4 H), 2.31 (s, 3 H), 1.96-1.91 (m, 2 H), 1.49 (s, 9 H); <sup>13</sup>C NMR (100 MHz, CDCl<sub>3</sub>, mixture of rotamers) δ 155.6, 155.5, 153.9, 153.8, 132.9, 130.9, 126.5, 123.1, 120.8 (2 C), 79.3, 56.2, 56.0, 55.5, 55.2, 48.4, 48.0, 46.2, 45.4, 29.0, 28.9, 28.5, 18.5; HRMS (ESI) *m/z* calcd for C<sub>17</sub>H<sub>27</sub>N<sub>2</sub>O<sub>2</sub> ([M+H]<sup>+</sup>) 291.2067, found 291.2062.

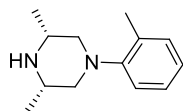

**(3S,5R)-3,5-Dimethyl-1-(*o*-tolyl)piperazine (4k).**<sup>11</sup> A Schlenk flask was flushed with N<sub>2</sub> and charged with *cis*-2,6-dimethylpiperazine (0.110 g, 0.963 mmol), NaO-*t*-Bu (0.170 g, 1.75 mmol), (*rac*)-BINAP (0.0084 g, 0.0130 mmol), Pd<sub>2</sub>(dba)<sub>3</sub> (0.0083 g, 0.0087 mmol), degassed toluene (4 mL), and 2-bromotoluene (0.150 g, 0.880 mmol). The reaction mixture was heated under N<sub>2</sub> at 110 °C for 24 h, cooled to room temperature, diluted with CH<sub>2</sub>Cl<sub>2</sub>, filtered through Celite, and concentrated *in vacuo*. The crude residue was purified by chromatography on SiO<sub>2</sub> (1:19, MeOH/CH<sub>2</sub>Cl<sub>2</sub>) to give **4k** (0.140 g, 0.685 mmol, 78%) as clear, yellow oil: <sup>1</sup>H NMR (500 MHz, CDCl<sub>3</sub>) δ 7.19-7.15 (m, 2 H), 7.02-6.98 (m, 2 H), 3.13-3.10 (m, 2 H), 3.01 (app d, 2 H, *J* = 10.5 Hz), 2.35-2.31 (m, 5 H), 1.12 (d, 6 H, *J* = 6.5 Hz).

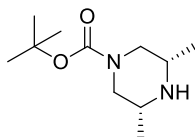

***tert*-Butyl 3,5-dimethylpiperazine-1-carboxylate (31).**<sup>12</sup> To a solution of *cis*-2,6-dimethylpiperazine (0.500 g, 4.38 mmol) in CH<sub>2</sub>Cl<sub>2</sub> (11 mL) at 0 °C was added dropwise a solution of Boc-anhydride (0.946 g, 4.33 mmol) in CH<sub>2</sub>Cl<sub>2</sub> (2.6 mL). The reaction mixture was allowed to warm to room temperature, stirred overnight, diluted with CH<sub>2</sub>Cl<sub>2</sub>

and washed with satd. aqueous Na<sub>2</sub>CO<sub>3</sub> solution. The aqueous layer was extracted with CH<sub>2</sub>Cl<sub>2</sub>. The combined organic layers were washed with brine, dried (MgSO<sub>4</sub>), filtered, and concentrated *in vacuo* to give **31** (0.813 g, 3.79 mmol, 87%) as an off-white solid: <sup>1</sup>H NMR (300 MHz, CDCl<sub>3</sub>) δ 4.10-3.80 (m, 2 H), 2.85-2.70 (m, 2 H), 2.40-2.20 (m, 2 H), 1.46 (s, 9 H), 1.05 (d, 6 H, *J* = 6.3 Hz).

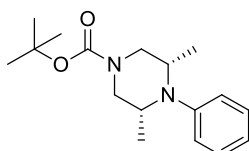

**tert-Butyl 3,5-dimethyl-4-phenylpiperazine-1-carboxylate (30b)**. To a sealed tube under an argon atmosphere was added a solution of KHMDS (0.241 g, 1.15 mmol) in dry 1,4-dioxane (2.0 mL), a solution of *tert*-butyl 3,5-dimethylpiperazine-1-carboxylate (**31**, 0.246 g, 1.15 mmol) in dry 1,4-dioxane (0.9 mL) and bromobenzene (100 μL, 0.955 mmol). The reaction mixture was stirred at 100 °C for 18 h, cooled to room temperature, quenched with water (5 mL), diluted with Et<sub>2</sub>O (15 mL) and the aqueous layer was extracted with Et<sub>2</sub>O (2 × 15 mL). The combined organic layers were washed with brine, dried (Na<sub>2</sub>SO<sub>4</sub>), filtered, and concentrated *in vacuo*. The crude residue was purified by chromatography on SiO<sub>2</sub> (1:9, EtOAc/hexanes) to give **30b** (0.0970 g, 0.334 mmol, 35%) as a colorless oil: <sup>1</sup>H NMR (300 MHz, CDCl<sub>3</sub>) δ 7.33-7.27 (m, 2 H), 7.15-7.09 (m, 3 H), 4.00-3.80 (m, 2 H), 3.07-3.03 (m, 2 H), 2.82 (brt, 2 H, *J* = 11.7 Hz), 1.50 (s, 9 H), 0.77 (d, 6 H, *J* = 6.3 Hz).

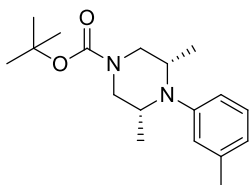

**tert-Butyl 3,5-dimethyl-4-(*m*-tolyl)piperazine-1-carboxylate (30c)**. A sealed tube under an argon atmosphere was treated with KHMDS (0.221 g, 1.05 mmol) in dry 1,4-dioxane (2.0 mL), a solution of *tert*-butyl 3,5-dimethylpiperazine-1-carboxylate (**31**, 0.226 g, 1.05 mmol) in dry 1,4-dioxane (0.7 mL) and bromotoluene (105 μL, 0.877 mmol). The reaction mixture was stirred at 100 °C for 18 h, cooled to room temperature, quenched

with water (5 mL), diluted with Et<sub>2</sub>O (15 mL) and the aqueous layer was extracted with Et<sub>2</sub>O (2 × 15 mL). The combined organic layers were washed with brine, dried (Na<sub>2</sub>SO<sub>4</sub>), filtered, and concentrated *in vacuo*. The residue was purified by chromatography on SiO<sub>2</sub> (1:9, EtOAc/hexanes) to give **30c** (0.0441 g, 0.145 mmol, 17%) as a colorless oil: <sup>1</sup>H NMR (300 MHz, CDCl<sub>3</sub>) δ 7.18 (t, 1 H, *J* = 7.5 Hz), 6.96-6.89 (m, 3 H), 4.00-3.80 (m, 2 H), 3.06-3.00 (m, 2 H), 2.81 (brt, 2 H, *J* = 11.7 Hz), 2.32 (s, 3 H), 1.50 (s, 9 H), 0.77 (d, 6 H, *J* = 6.3 Hz).

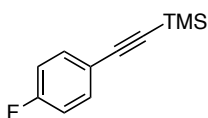

**((4-Fluorophenyl)ethynyl)trimethylsilane (32)**.<sup>13,14</sup> A flame-dried flask under Ar was charged with Pd(PPh)<sub>2</sub>Cl<sub>2</sub> (0.361 g, 0.514 mmol), CuI (0.0979 g, 0.514 mmol), and 4-fluorobromobenzene (5.66 mL, 51.4 mmol). Et<sub>3</sub>N (110 mL) and (trimethylsilyl)acetylene (10.9 mL, 77.1 mmol) were added via syringe and the solution was sparged with Ar for 30 min. The reaction mixture was heated to 80 °C overnight and analysis by TLC (4:1, hexanes/EtOAc) indicated that 4-fluorobromobenzene had been consumed. The solution was cooled to room temperature and filtered through celite. The celite was washed (Et<sub>2</sub>O) until the washes appeared colorless. The combined filtrates were concentrated in vacuo. The crude residue was purified by chromatography on SiO<sub>2</sub> (hexanes) to afford **32** (9.03 g, 47.0 mmol, 91%) as a pale orange oil: <sup>1</sup>H NMR (300 MHz, CDCl<sub>3</sub>) δ 7.47-7.42 (m, 2 H), 6.99 (t, 2 H, *J* = 8.7 Hz), 0.25 (s, 9 H); <sup>13</sup>C NMR (75 MHz, CDCl<sub>3</sub>) δ 162.6 (d, *J*<sub>C-F</sub> = 248 Hz), 133.9 (d, *J*<sub>C-F</sub> = 8 Hz), 119.3 (d, *J*<sub>C-F</sub> = 4 Hz), 115.5 (d, *J*<sub>C-F</sub> = 22 Hz), 104.0, 93.8, -0.07.

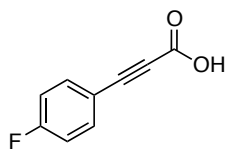

**3-(4-Fluorophenyl)propionic acid (33)**.<sup>14</sup> CsF (4.74 g, 31.2 mmol) was loaded into an oven-dried 250-mL round bottom flask in a glovebox. The flask was removed from the glovebox, attached to a CO<sub>2</sub> balloon, equipped with a magnetic stirrer and a septum, and

filled with anhydrous DMSO (60 mL). Neat **32** (5.00 g, 26.0 mmol) was added dropwise. The reaction mixture was stirred under CO<sub>2</sub> at room temperature overnight, diluted with water (600 mL) and washed with CH<sub>2</sub>Cl<sub>2</sub> (2 × 150 mL). The aqueous layer was acidified at 0 °C to pH 1 with 6 M HCl and then extracted with Et<sub>2</sub>O (3 × 200 mL). The combined organic layers were dried (MgSO<sub>4</sub>), filtered, and concentrated in vacuo to afford **33** (3.02 g, 18.4 mmol, 71%) as an orange solid: <sup>1</sup>H NMR (400 MHz, Acetone-d<sub>6</sub>) δ 11.74 (brs, 1 H), 7.71 (dd, 2 H, *J* = 8.6, 5.6 Hz), 7.26 (t, 2 H, *J* = 8.6 Hz); <sup>13</sup>C NMR (100 MHz, Acetone-d<sub>6</sub>) δ 164.8 (d, *J*<sub>C-F</sub> = 249 Hz), 154.7, 136.1 (d, *J*<sub>C-F</sub> = 9 Hz), 117.1 (d, *J*<sub>C-F</sub> = 23 Hz), 84.6, 81.8.

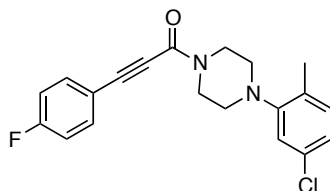

**1-(4-(5-Chloro-2-methylphenyl)piperazin-1-yl)-3-(4-fluorophenyl)prop-2-yn-1-one**

**(34)**. To a solution of **33** (3.00 g, 18.3 mmol) in anhydrous CH<sub>2</sub>Cl<sub>2</sub> (180 mL) at 0 °C was added 1-(5-chloro-2-methylphenyl)piperazine (4.62 g, 21.9 mmol), and Et<sub>3</sub>N (6.35 mL, 45.7 mmol), followed by dropwise addition of T3P (50 wt.% solution in EtOAc, 19.4 mL, 27.4 mmol). The reaction mixture was stirred at 0 °C for 30 min, warmed to room temperature overnight, diluted with CH<sub>2</sub>Cl<sub>2</sub> (200 mL), washed with 1 M HCl (150 mL), dried (MgSO<sub>4</sub>), filtered, and concentrated in vacuo. The residue was purified by chromatography on SiO<sub>2</sub> (2:1, hexanes/EtOAc) to give **34** (5.22 g, 14.6 mmol, 80%) as an off white solid: Mp 138.7-140.4 °C; IR (neat) 2924, 2216, 1625, 1596, 1504, 1443, 1431, 1219, 1038, 837 cm<sup>-1</sup>; <sup>1</sup>H NMR (300 MHz, CDCl<sub>3</sub>) δ 7.55 (dd, 2 H, *J* = 7.5, 5.4 Hz), 7.12-6.94 (m, 5 H), 3.96 (app t, 2 H, *J* = 4.8 Hz), 3.82 (app t, 2 H, *J* = 4.8 Hz), 2.95 (app t, 2 H, *J* = 4.8 Hz), 2.87 (app t, 2 H, *J* = 4.8 Hz), 2.28 (s, 3 H); <sup>13</sup>C NMR (75 MHz, CDCl<sub>3</sub>) δ 163.5 (d, *J*<sub>C-F</sub> = 251 Hz), 153.0, 151.7, 134.5 (d, *J*<sub>C-F</sub> = 9 Hz), 132.1, 131.8, 130.9, 123.7, 119.8, 116.4 (d, *J*<sub>C-F</sub> = 4 Hz), 116.0 (d, *J*<sub>C-F</sub> = 23 Hz), 89.9, 80.9, 51.9, 51.3, 47.4, 41.8, 17.3; HRMS (ESI) *m/z* calcd for C<sub>20</sub>H<sub>19</sub>ClFON<sub>2</sub> ([M+H]<sup>+</sup>) 357.1164, found 357.1165



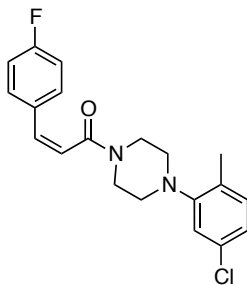

**(Z)-1-(4-(5-Chloro-2-methylphenyl)piperazin-1-yl)-3-(4-fluorophenyl)prop-2-en-1-one (35).** To a solution of **34** (5.00 g, 14.0 mmol) in dry EtOAc (140 mL) was added Lindlar's catalyst (5% Pd on CaCO<sub>3</sub>, lead poisoned, 0.298 g, equivalent to 1 mol% Pd) and quinoline (0.83 mL, 7.01 mmol). The reaction vessel was placed under vacuum, backfilled with H<sub>2</sub> (balloon, 2x) and allowed to stir at room temperature for 6 h. Analysis by TLC (2:1, hexanes/EtOAc) indicated that **34** had been mostly consumed. The reaction mixture was filtered through Celite, washed with EtOAc, and concentrated under vacuum. The combined organic layers were washed with 1 M HCl, dried (MgSO<sub>4</sub>), filtered, and concentrated in vacuo. The crude material was purified by chromatography on SiO<sub>2</sub> (1:1, hexanes/EtOAc) to afford **35** (3.15 g, 8.78 mmol, 63%, 87% brsm) as a colorless solid: IR (neat) 2913, 2239, 1616, 1506, 1437, 1223, 837, 725 cm<sup>-1</sup>; <sup>1</sup>H NMR (400 MHz, CDCl<sub>3</sub>) δ 7.41-7.36 (m, 2 H), 7.08-7.02 (m, 3 H), 6.96 (dd, 1 H, *J* = 8.1, 2.1 Hz), 6.80 (d, 1 H, *J* = 2.1 Hz), 6.66 (d, 1 H, *J* = 12.5 Hz), 6.05 (d, 1 H, *J* = 12.5 Hz), 3.80 (m, 2 H, *J* = 5.0 Hz), 3.49 (t, 2 H, *J* = 5.0 Hz), 2.80 (t, 2 H, *J* = 5.0 Hz), 2.53 (t, 2 H, *J* = 5.0 Hz), 2.21 (s, 3 H); <sup>13</sup>C NMR (100 MHz, CDCl<sub>3</sub>) δ 167.3, 162.7 (d, *J*<sub>C-F</sub> = 248 Hz), 151.7, 132.6, 132.0, 131.8, 131.5 (d, *J*<sub>C-F</sub> = 3 Hz), 132.1, 131.8, 130.9, 130.2 (d, *J*<sub>C-F</sub> = 8 Hz), 123.6, 122.7, 119.6, 115.6 (d, *J*<sub>C-F</sub> = 21 Hz), 51.4, 51.2, 46.5, 41.5, 17.3; HRMS (ESI) *m/z* calcd for C<sub>20</sub>H<sub>21</sub>ClFON<sub>2</sub> ([M+H]<sup>+</sup>) 359.1321, found 359.1329.

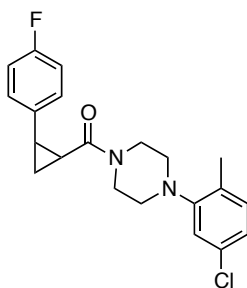

**(4-(5-Chloro-2-methylphenyl)piperazin-1-yl)((1*RS*,2*SR*)-2-(4-fluorophenyl)cyclopropyl)-methanone (27)**. THF (90 mL) was degassed by sparging with Ar for 60 min and treated at room temperature under Ar atmosphere with anhydrous CrCl<sub>2</sub> (6.43 g, 51.8 mmol) followed by **35** (3.10 g, 8.64 mmol) and CH<sub>2</sub>ICl (3.36 mL, 43.2 mmol). The reaction mixture was stirred for 20 h at 80 °C, cooled to room temperature, quenched by the addition of 1.0 M aqueous HCl (300 mL) and extracted with EtOAc (3 x 300 mL). The combined organic layers were filtered through a plug of basic Al<sub>2</sub>O<sub>3</sub>, and concentrated in vacuo. The residue was purified by chromatography on SiO<sub>2</sub> (1:1, hexanes/EtOAc) to afford an oil that was further purified twice by chromatography on basic Al<sub>2</sub>O<sub>3</sub> (1:1, hexanes/EtOAc) to give **27** (2.76 g, 7.41 mmol, 86%) as a clear oil that solidified after storage on high vacuum overnight: Mp 78.2-80.4 °C (hexanes); IR (CH<sub>2</sub>Cl<sub>2</sub>) 2936, 1637, 1592, 1510, 1487, 1435, 1223, 1033, 837, 815 cm<sup>-1</sup>; <sup>1</sup>H NMR (400 MHz, CDCl<sub>3</sub>) δ 7.16-7.11 (m, 2 H), 7.07 (dd, 1 H, *J* = 8.1, 0.5 Hz), 7.00-6.94 (m, 3 H), 6.73 (d, 1 H, *J* = 2.1 Hz), 3.81-3.76 (m, 1 H), 3.71-3.60 (m, 2 H), 3.36 (ddd, 1 H, *J* = 12.4, 8.8, 3.1 Hz), 2.79-2.71 (m, 2 H), 2.45 (td, 1 H, *J* = 8.8, 7.0 Hz), 2.35-2.29 (m, 1 H), 2.26-2.16 (m, 5 H), 1.83 (dt, 1 H, *J* = 7.0, 5.6 Hz), 1.35 (td, 1 H, *J* = 8.8, 5.6 Hz); <sup>13</sup>C NMR (100 MHz, CDCl<sub>3</sub>) δ 167.2, 161.7 (d, *J*<sub>C-F</sub> = 244 Hz), 151.9, 133.1 (d, *J*<sub>C-F</sub> = 3 Hz), 131.9 (d, *J*<sub>C-F</sub> = 14 Hz), 130.9, 129.1 (d, *J*<sub>C-F</sub> = 8 Hz), 123.6, 119.7, 115.0 (d, *J*<sub>C-F</sub> = 21 Hz), 51.8, 51.6, 45.6, 42.2, 23.8, 23.5, 17.3, 10.7; HRMS (ESI) *m/z* calcd for C<sub>21</sub>H<sub>23</sub>ClFON<sub>2</sub> ([M+H]<sup>+</sup>) 373.1477, found 373.1478.

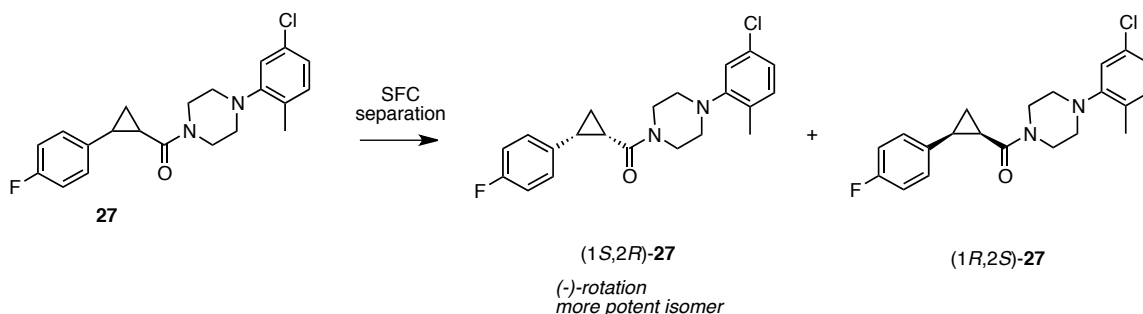

Racemic **27** was separated on a SFC Chiralpak-IC semiprep (250 x 10 mm) column (20% MeOH, 6 mL/min, 220 nM, P=100) to afford (4-(5-chloro-2-methylphenyl)piperazin-1-yl)((1*S*,2*R*)-2-(4-fluorophenyl)cyclopropyl)methanone ((1*S*,2*R*)-**27**, retention time 13.1 min) as a colorless viscous oil (100% purity by ELSD): [ $\alpha$ ]<sub>D</sub><sup>20</sup> -118.7 (*c* 0.39, CHCl<sub>3</sub>); <sup>1</sup>H

NMR (300 MHz, CDCl<sub>3</sub>)  $\delta$  7.17-7.10 (m, 2 H), 7.07 (d, 1 H,  $J = 8.1$  Hz), 7.02-6.94 (m, 3 H), 6.72 (d, 1 H  $J = 2.1$  Hz), 3.83-3.75 (m, 1 H), 3.72-3.58 (m, 2 H), 3.39-3.31 (m, 1 H), 2.81-2.69 (m, 2 H), 2.45 (td, 1 H,  $J = 8.7, 6.9$  Hz), 2.36-2.25 (m, 1 H), 2.25-2.15 (m, 5 H), 1.83 (dt, 1 H,  $J = 6.9, 5.5$  Hz), 1.35 (td, 1 H,  $J = 8.7, 5.5$  Hz); HRMS (ESI)  $m/z$  calcd for C<sub>21</sub>H<sub>23</sub>ClFON<sub>2</sub> ([M+H]<sup>+</sup>) 373.1477, found 373.1476. The enantiomeric excess was 100% ee (SFC Chiralpak-IC (250 x 4.6 mm); 20% MeOH, 220 nM, 2 mL/min; retention time: 9.8 min).

(4-(5-Chloro-2-methylphenyl)piperazin-1-yl)((1*R*,2*S*)-2-(4-fluorophenyl)cyclopropyl)-methanone ((1*R*,2*S*)-**27**, retention time 16.5 min) was obtained as a colorless viscous oil (100% purity by ELSD):  $[\alpha]_D^{20} +117.4$  ( $c$  0.38, CHCl<sub>3</sub>); <sup>1</sup>H NMR (300 MHz, CDCl<sub>3</sub>)  $\delta$  7.17-7.10 (m, 2 H), 7.07 (d, 1 H,  $J = 8.1$  Hz), 7.01-6.94 (m, 3 H), 6.72 (d, 1 H,  $J = 2.1$  Hz), 3.82-3.74 (m, 1 H), 3.71-3.60 (m, 2 H), 3.39-3.30 (m, 1 H), 2.81-2.68 (m, 2 H), 2.45 (td, 1 H,  $J = 8.6, 7.0$  Hz), 2.35-2.26 (m, 1 H), 2.25-2.15 (m, 5 H), 1.83 (dt, 1 H,  $J = 7.0, 5.6$  Hz), 1.35 (td, 1 H,  $J = 8.6, 5.6$  Hz); HRMS (ESI)  $m/z$  calcd for C<sub>21</sub>H<sub>23</sub>ClFON<sub>2</sub> ([M+H]<sup>+</sup>) 373.1477, found 373.1476. The enantiomeric excess was 100% ee (SFC Chiralpak-IC (250 x 4.6 mm); 20% MeOH, 220 nM, 2 mL/min; retention time: 12 min).

Stability testing of **5b**:

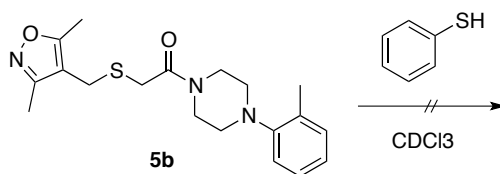

**Stability Testing of 5b monitored by  $^1\text{H}$  NMR.** To a solution of **5b** (5.3 mg, 0.015 mmol) in  $\text{CDCl}_3$  (400  $\mu\text{L}$ ) in an NMR tube was added a solution of thiophenol (140  $\mu\text{L}$  of a solution of thiophenol (100  $\mu\text{L}$ , 10.78 mg) in  $\text{CDCl}_3$  (1 mL). NMR spectra were recorded at 0, 1 h, 4.5 h, 24 h, 48 h, 1 week, and 2 weeks. The spectra remained unchanged over this time period. After 2 weeks, the sample was analyzed by LCMS and showed starting material and another other compound tentatively assigned as thiophenol.

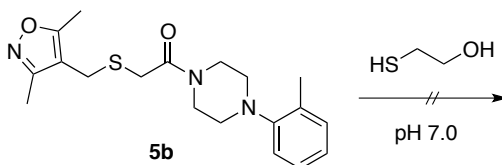

**Stability Testing of 5b monitored by LCMS.** To a solution of **5b** (1.6 mg, 0.0045 mmol) in MeOH (150  $\mu\text{L}$ ) was added pH 7 buffer (1.35 mL) and mercaptoethanol (1 drop). After 1.5 h, 3 h, 24 h, and 1 week, a sample of the cloudy solution was filtered (filter diameter 0.45  $\mu\text{m}$ ) into an LCMS vial and monitored by LCMS. Chromatograms did not change during this time period.

### 3. References

- (1) Glennon, R. A.; Slusher, R. M.; Lyon, R. A.; Titeler, M.; McKenney, J. D. *J. Med. Chem.* **1986**, *29*, 2375-2380.
- (2) Jorand-Lebrun, C.; Pauwels, P. J.; Palmier, C.; Moret, C.; Chopin, P.; Perez, M.; Marien, M.; Halazy, S. *J. Med. Chem.* **1997**, *40*, 3974-3978.
- (3) Zhou, G.; Ting, P.; Aslanian, R.; Piwinski, J. J. *Org. Lett.* **2008**, *10*, 2517-2520.
- (4) Abel, U.; Kubas, H.; Meyer, U.; Zemribo, R. World Patent 152854.
- (5) Natale, N. R.; Quincy, D. A. *Synth. Commun.* **1983**, *13*, 817-822.
- (6) Moreno-Mañas, M.; Arredondo, Y.; Pleixats, R.; Teixidó, M.; Raga, M. M.; Palacín, C.; Castelló, J. M.; Ortiz, J. A. *J. Heterocycl. Chem.* **1992**, *29*, 1557-1560.
- (7) Bahrami, K.; Khodaei, M. M.; Sheikh Arabi, M. *J. Org. Chem.* **2010**, *75*, 6208-6213.
- (8) Miura, K.; Fujisawa, N.; Saito, H.; Wang, D.; Hosomi, A. *Org. Lett.* **2001**, *3*, 2591-2594.
- (9) Gruseck, U.; Heuschmann, M. *Tet. Lett.* **1987**, *28*, 6027-6030.
- (10) Harris, M. C.; Huang, X.; Buchwald, S. L. *Org. Lett.* **2002**, *4*, 2885-2888.
- (11) Wipf, P.; Skoda, E. M.; Wang, Z. World Patent 042297 A1, 2015.
- (12) Jacobsen, E. J.; Stelzer, L. S.; TenBrink, R. E.; Belonga, K. L.; Carter, D. B.; Im, H. K.; Im, W. B.; Sethy, V. H.; Tang, A. H.; VonVoigtlander, P. F.; Petke, J. D.; Zhong, W.-Z.; Mickelson, J. W. *J. Med. Chem.* **1999**, *42*, 1123-1144.
- (13) Everett *et al.*, *Org. Lett.* **2013**, *15*, 2926-2929.
- (14) Yonemoto-Kobayashi *et al.*, *Org. Biomol. Chem.* **2013**, *11*, 3773-3775

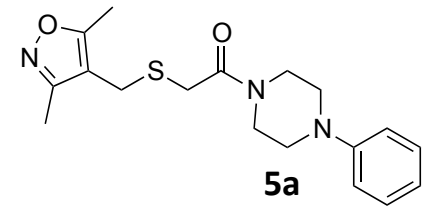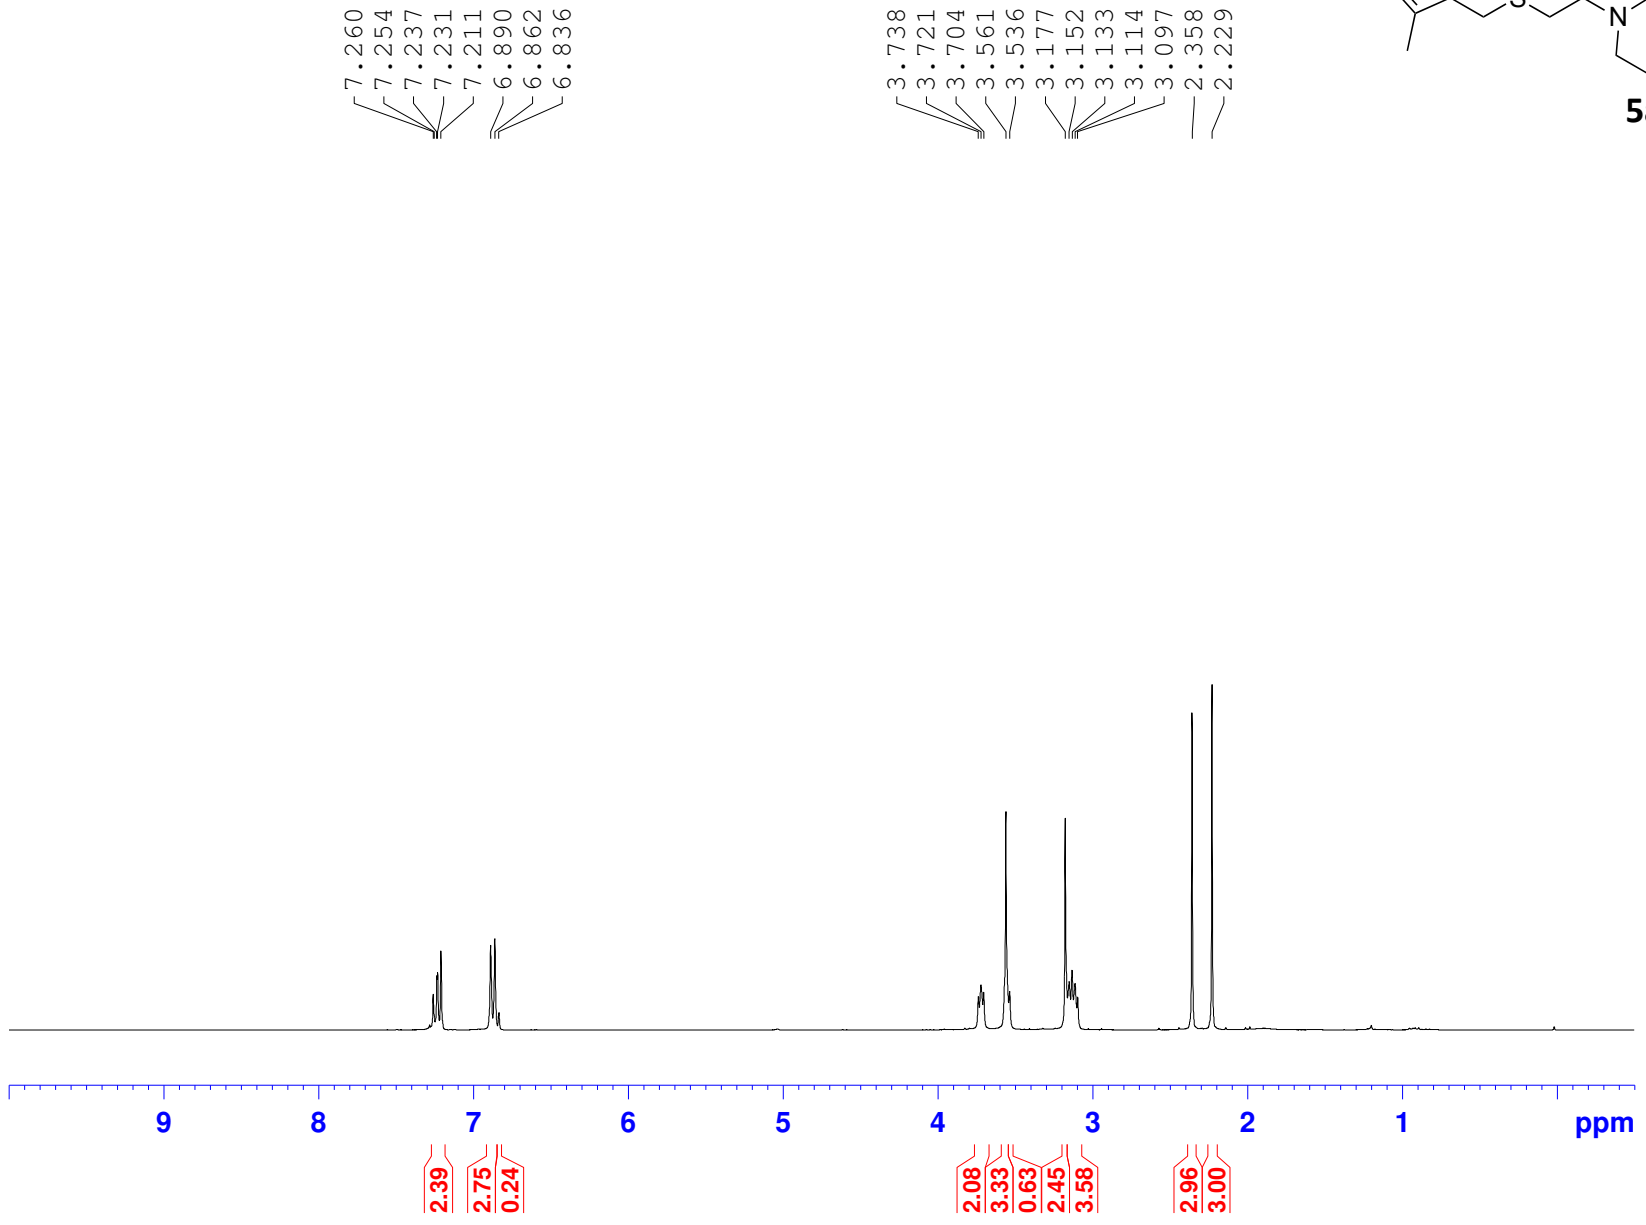

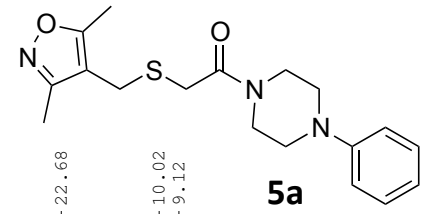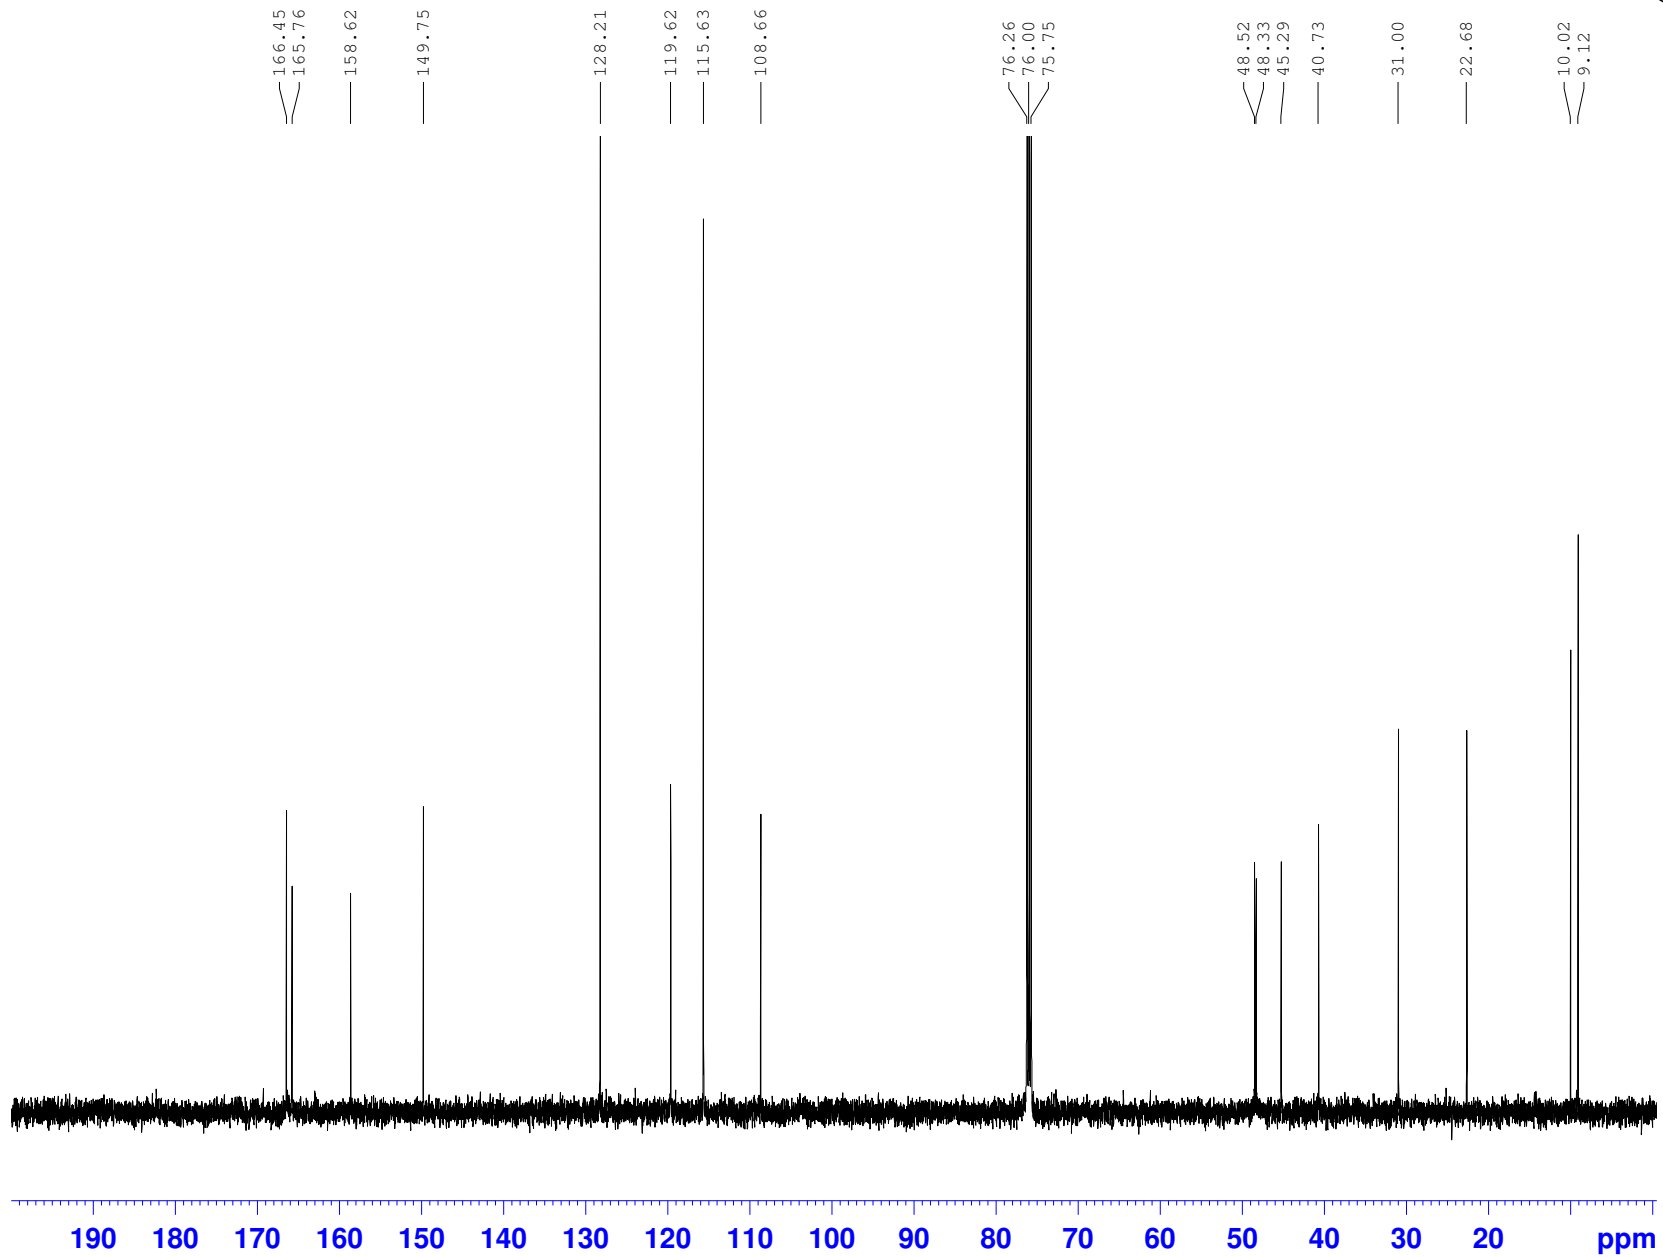

S48

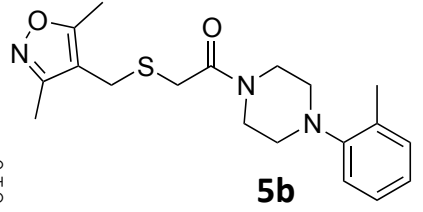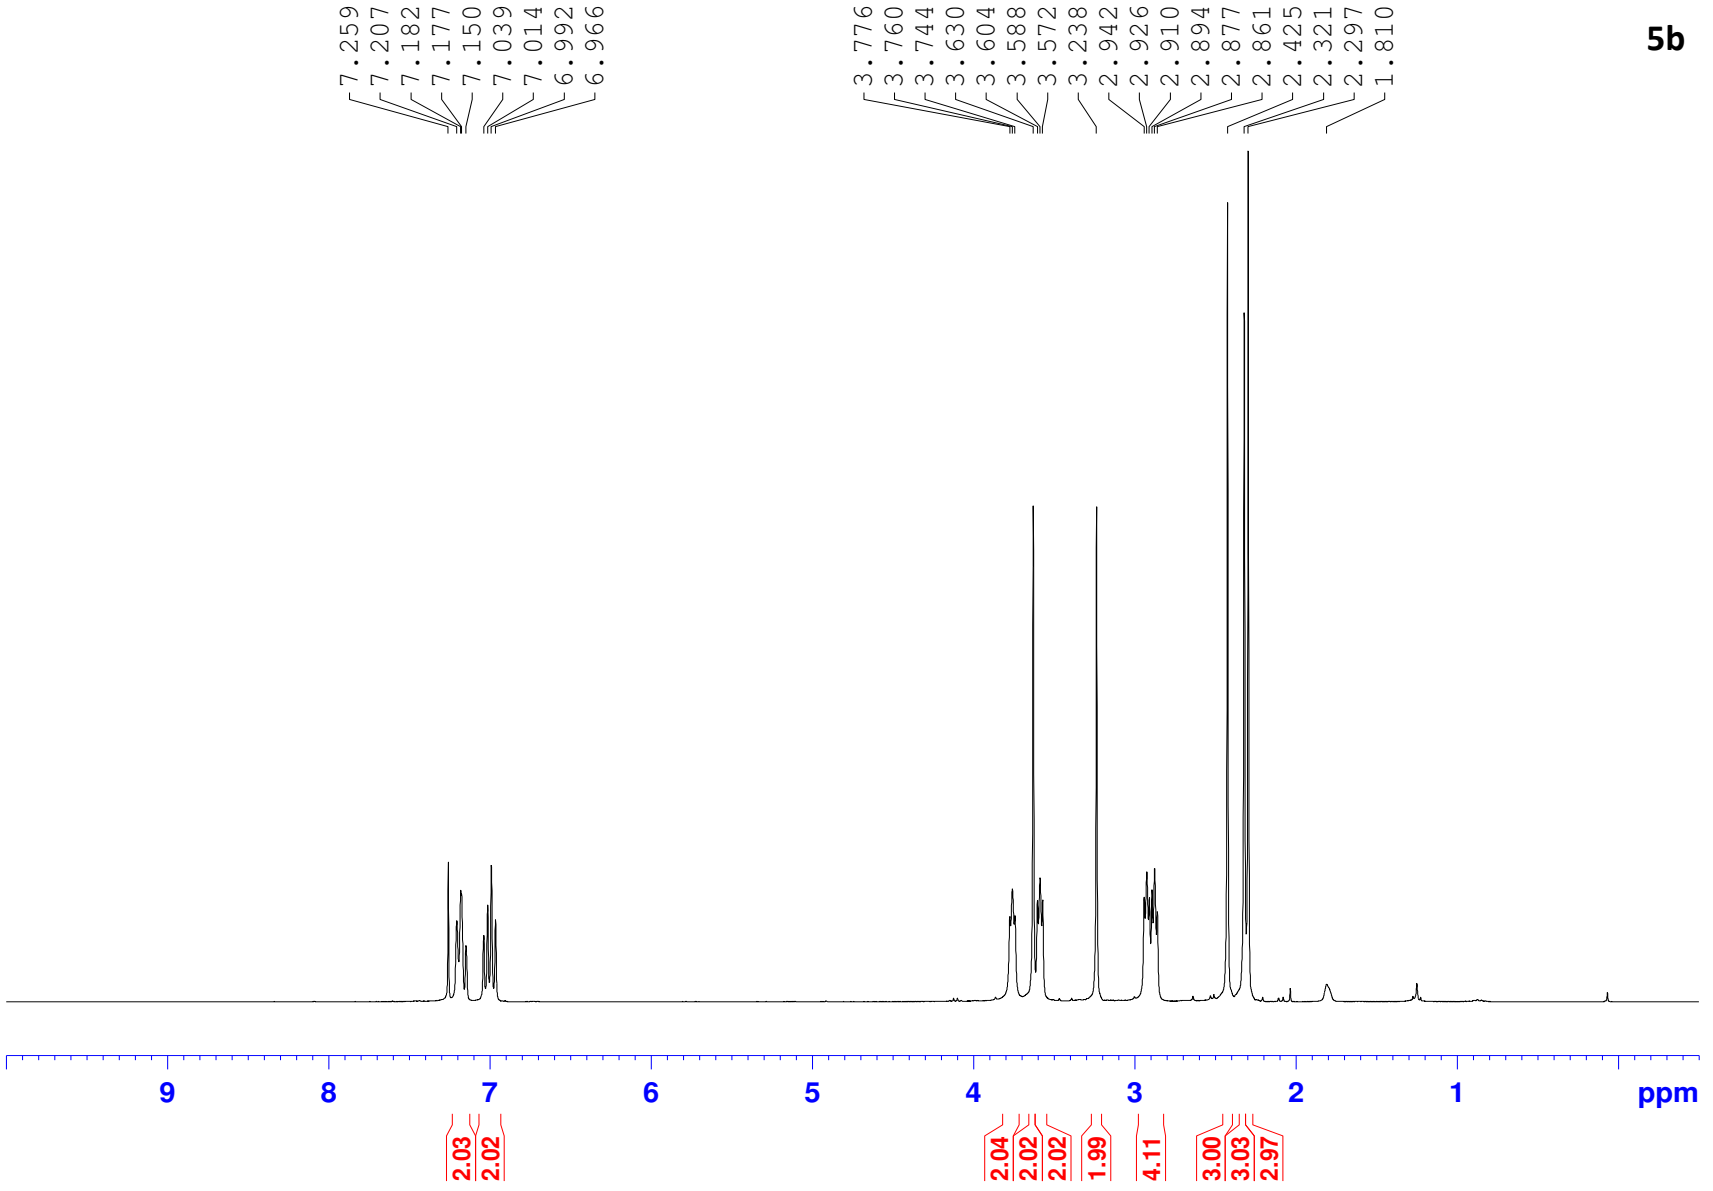



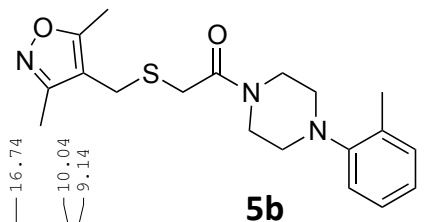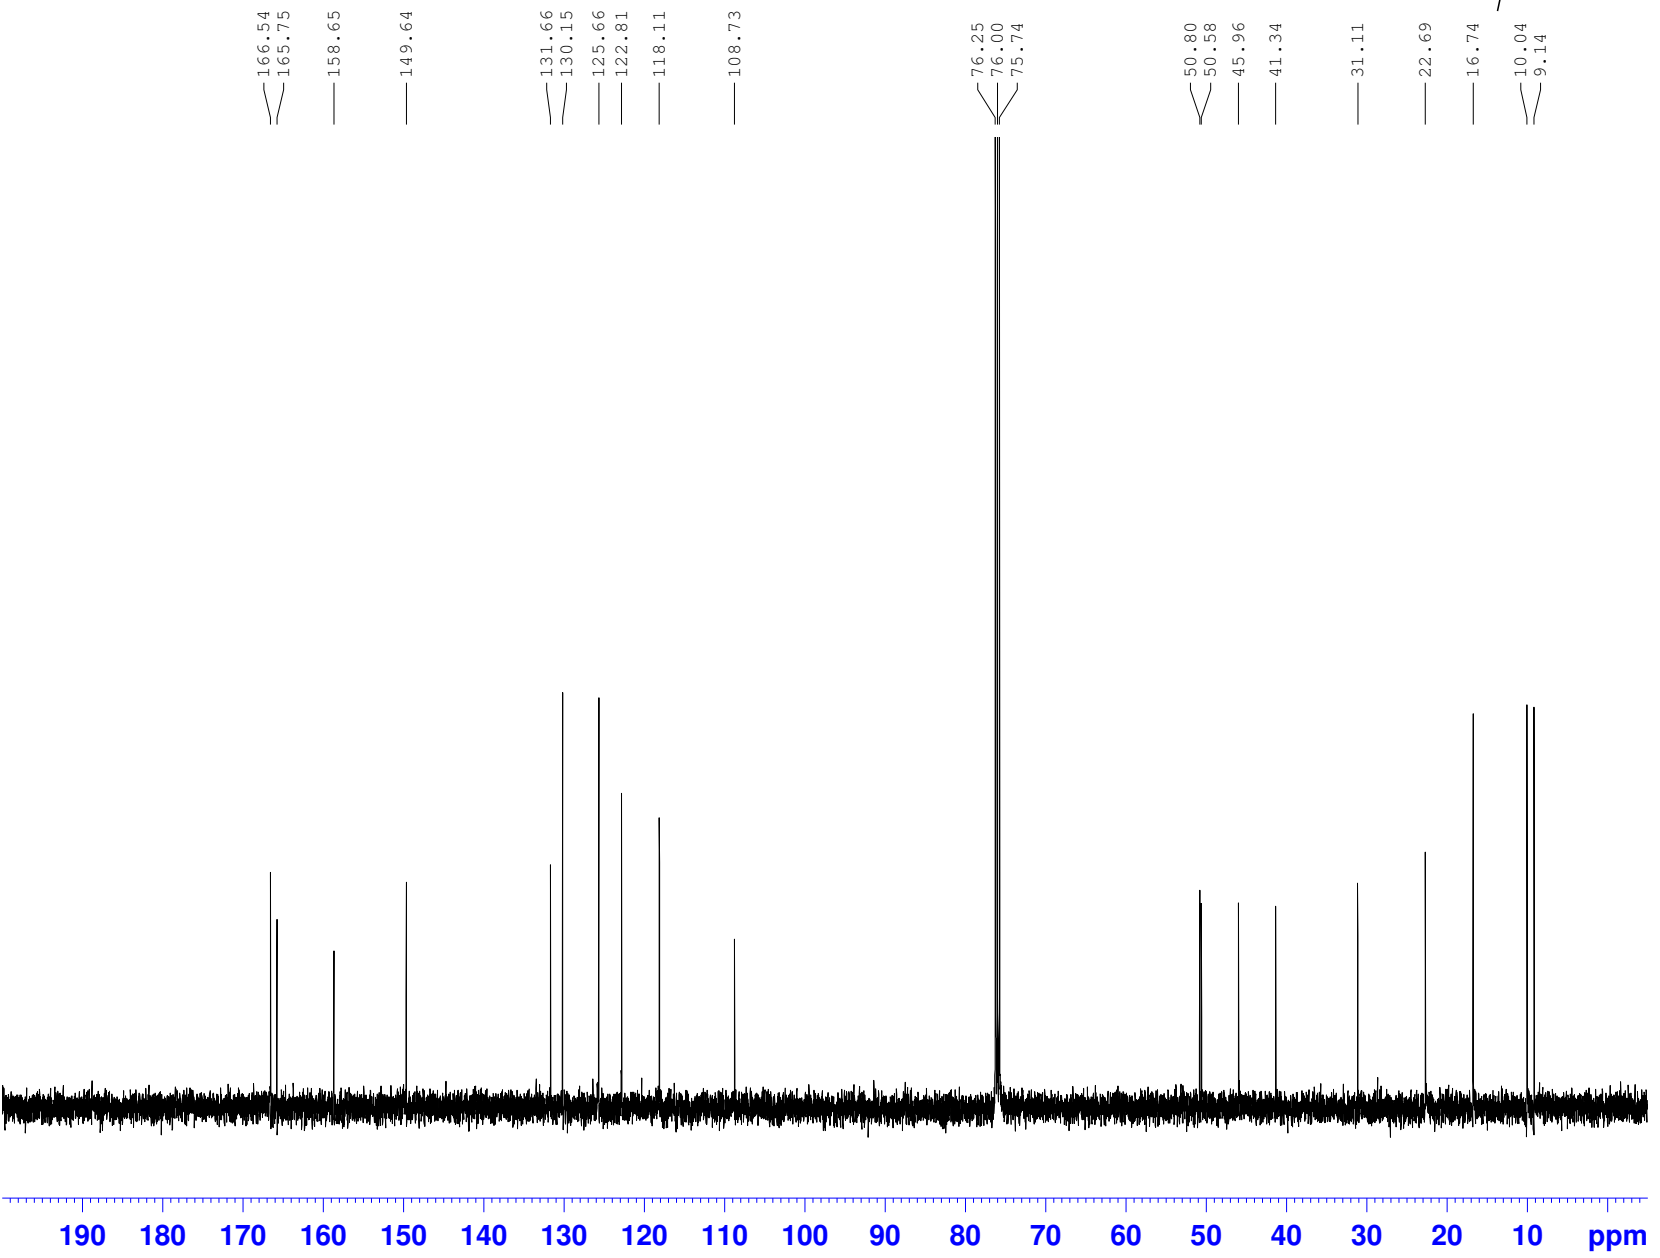

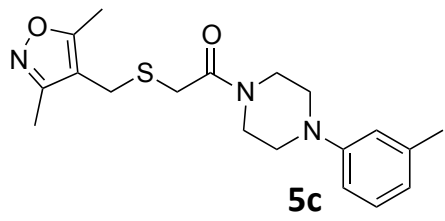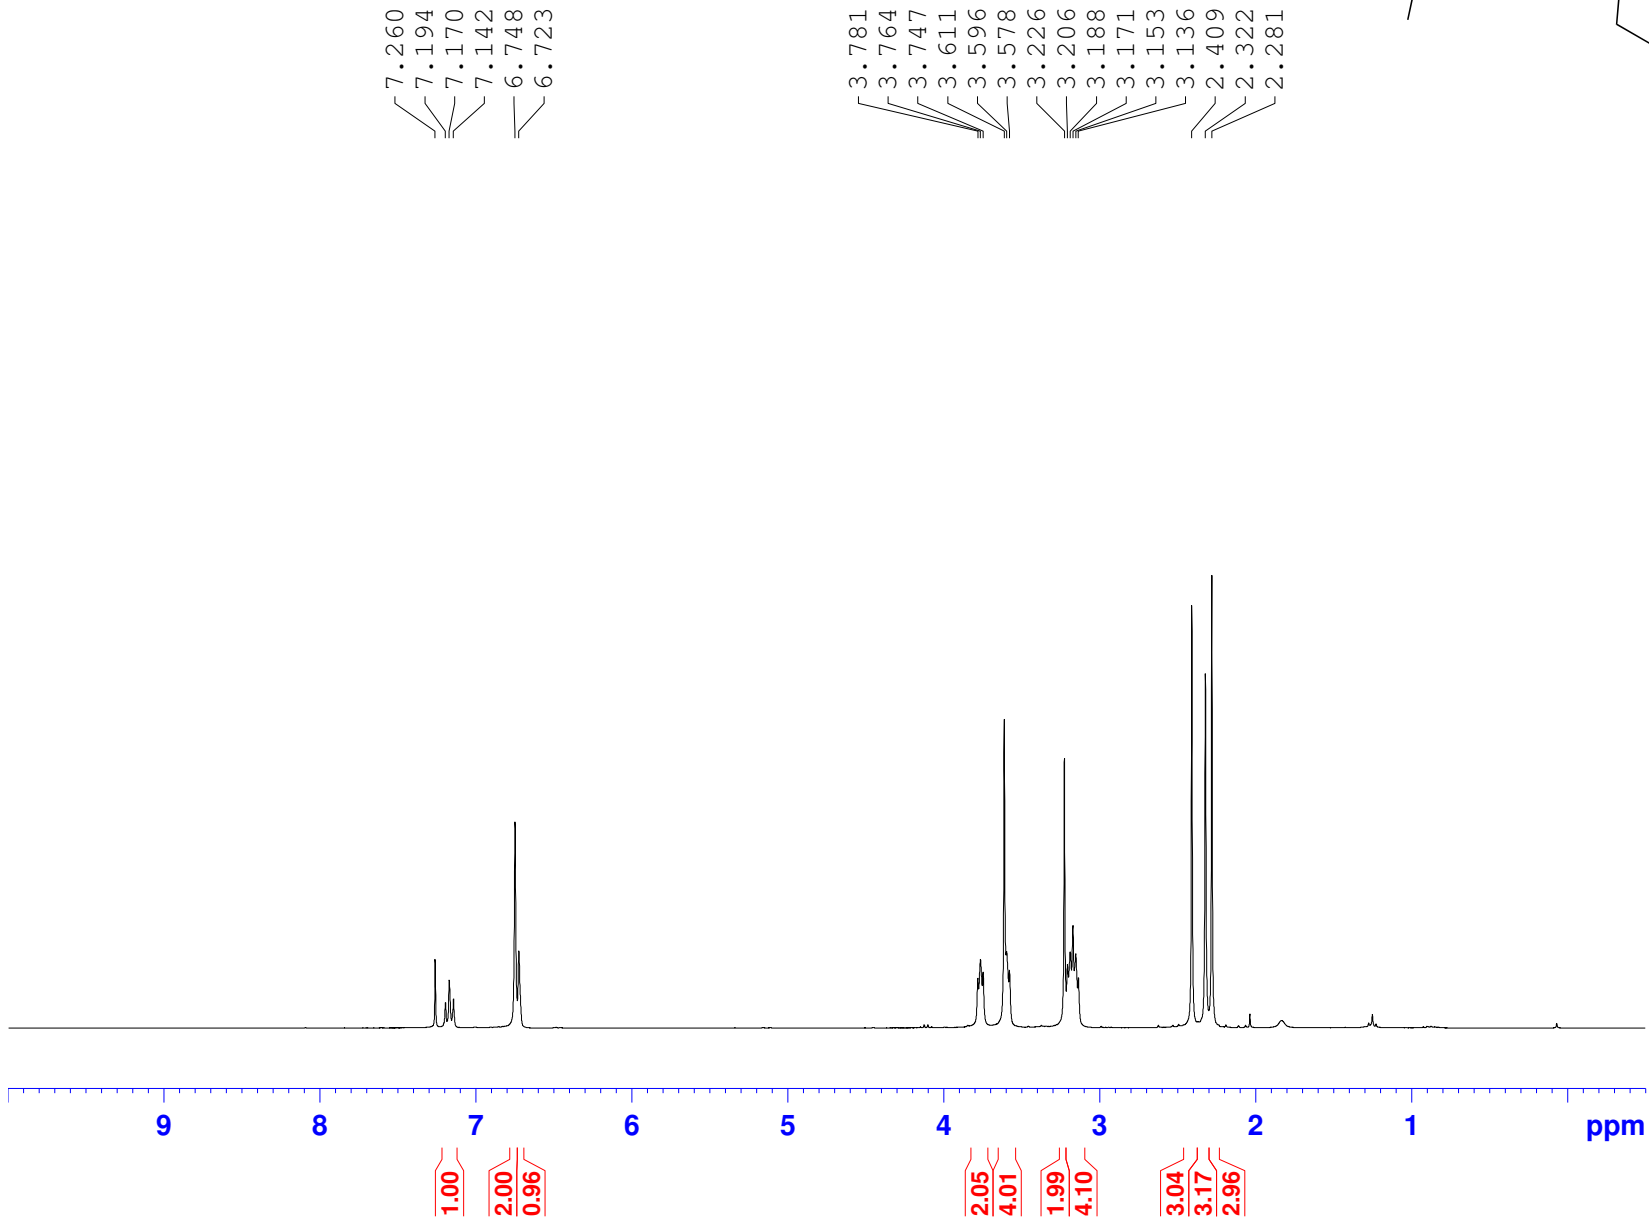

S51

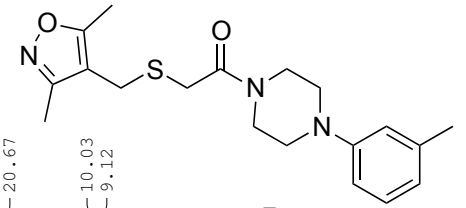

**5c**

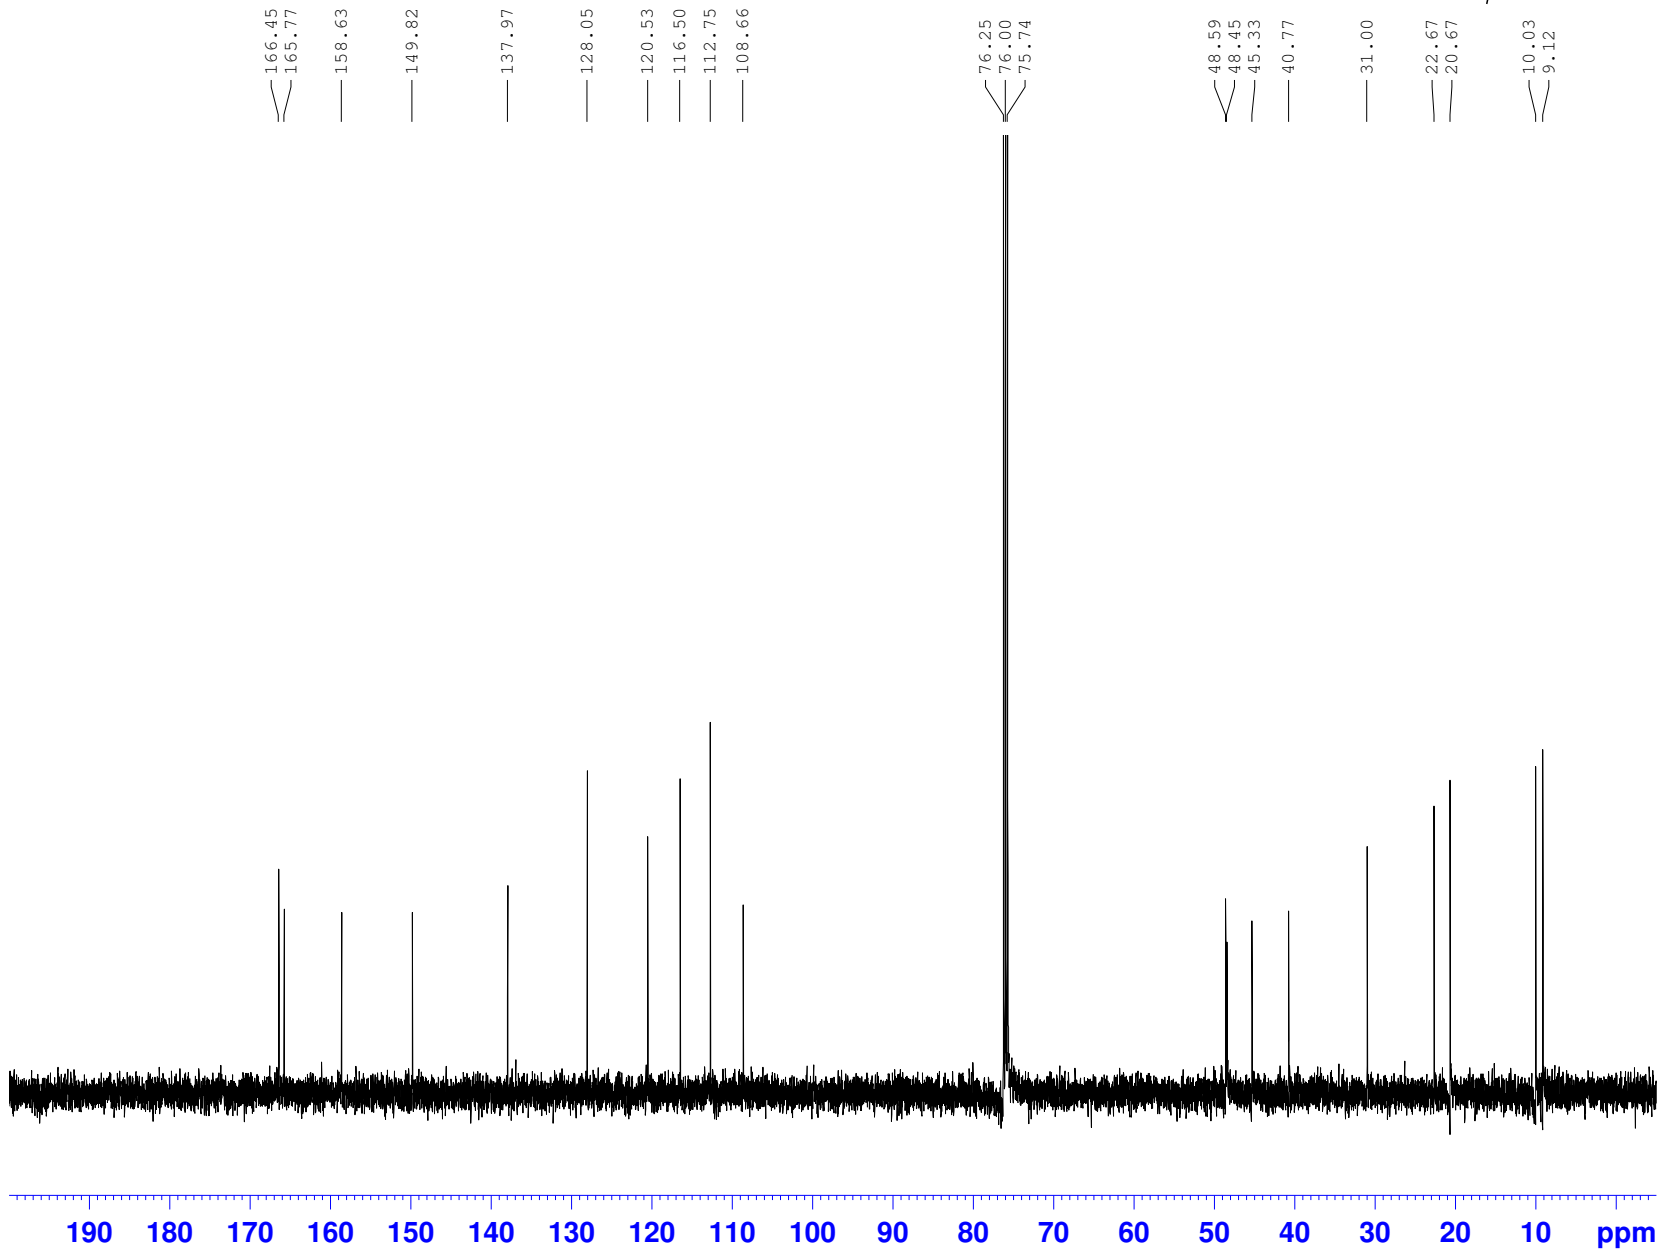

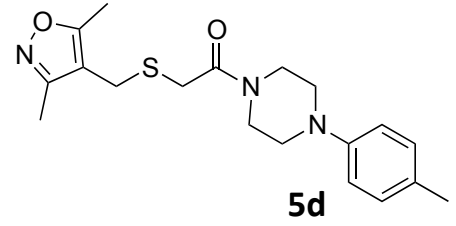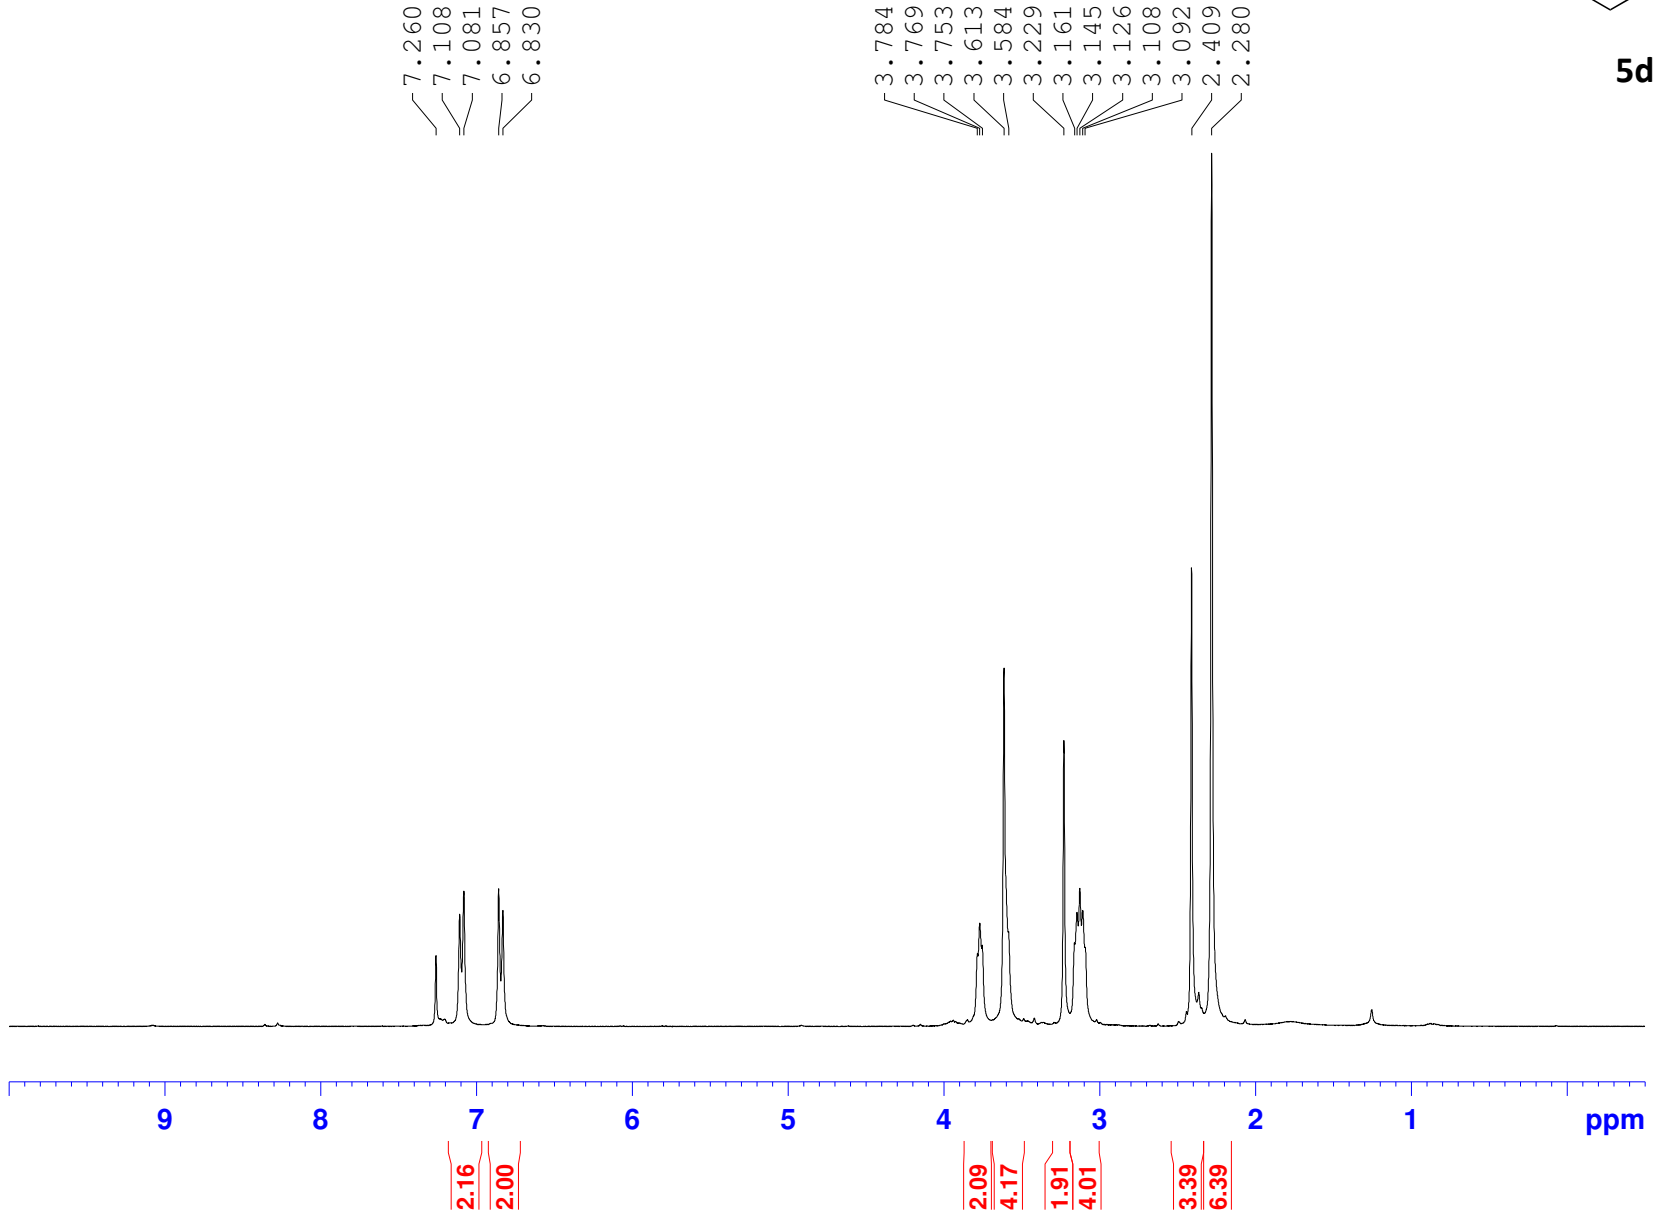

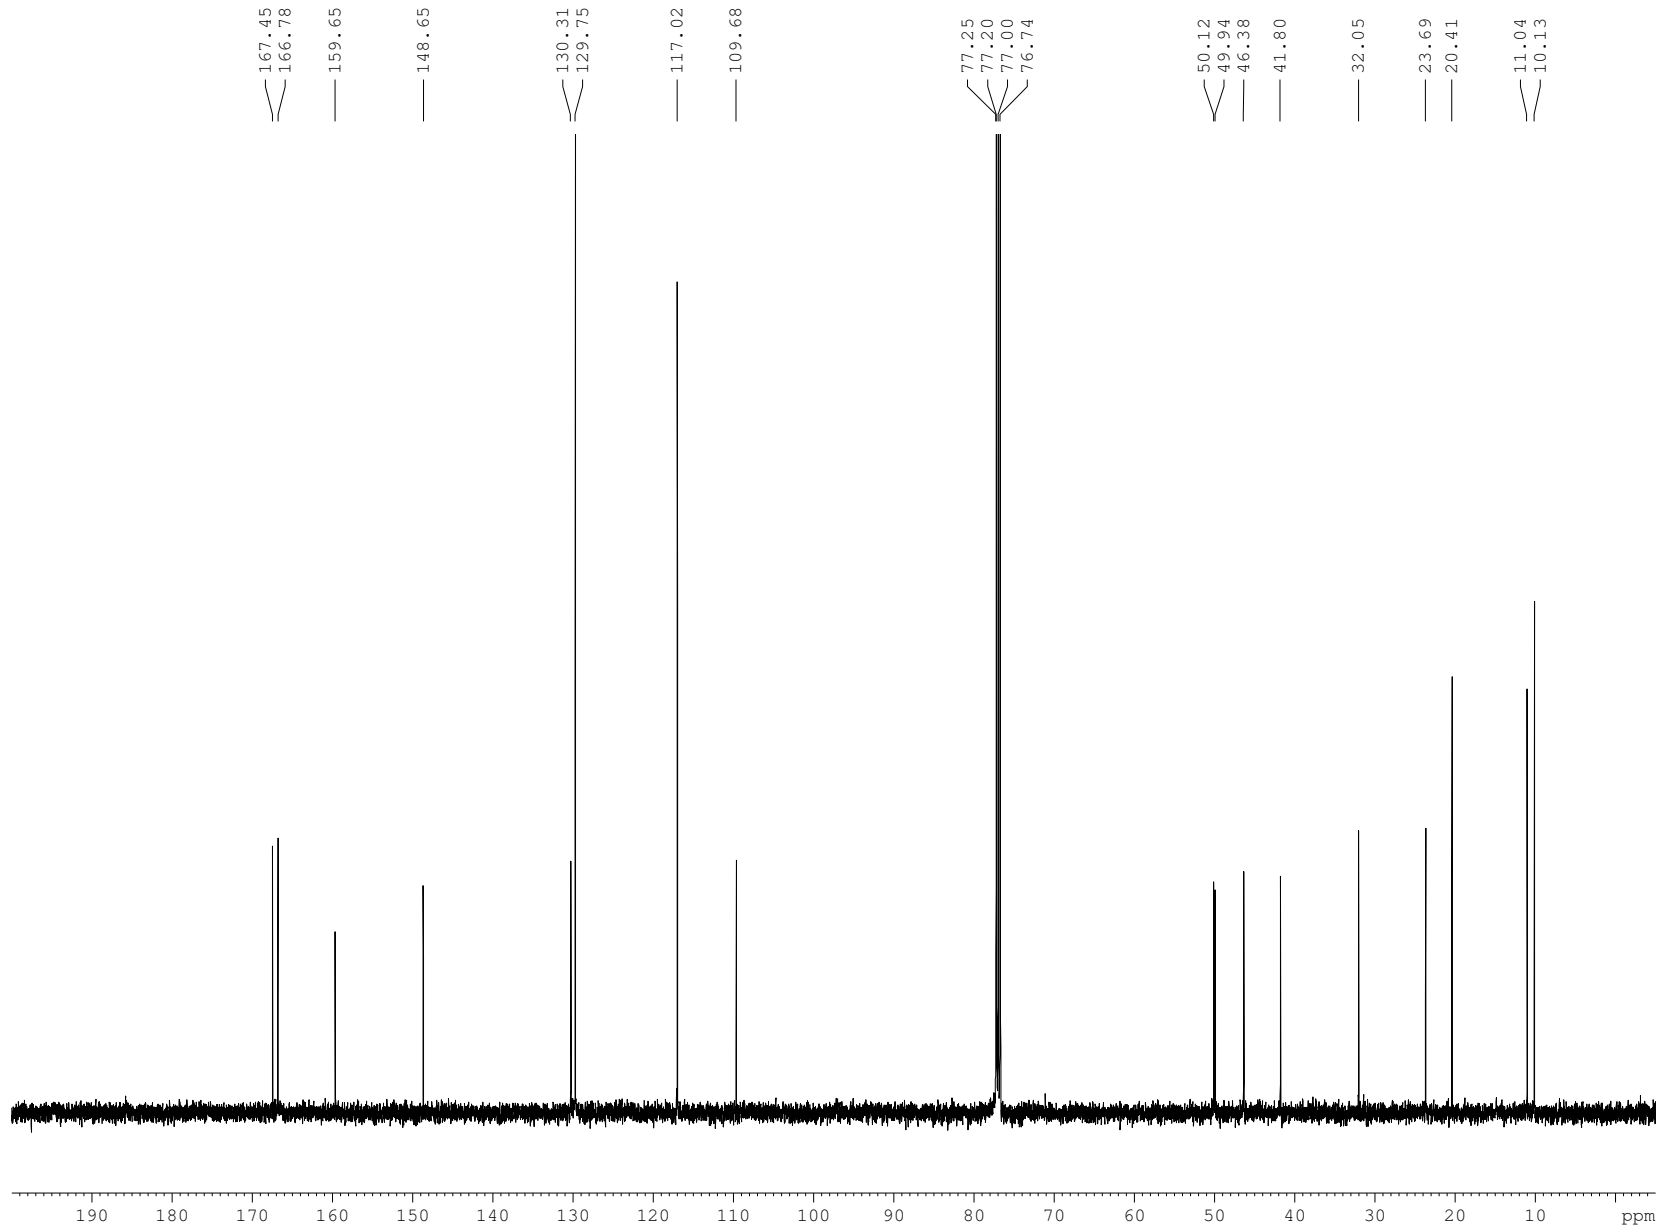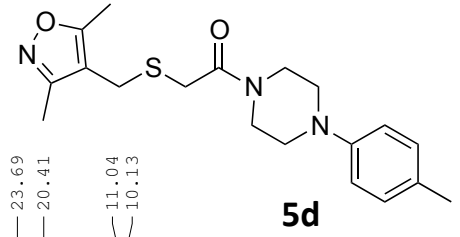

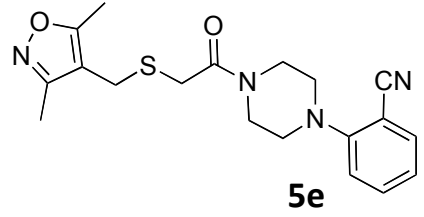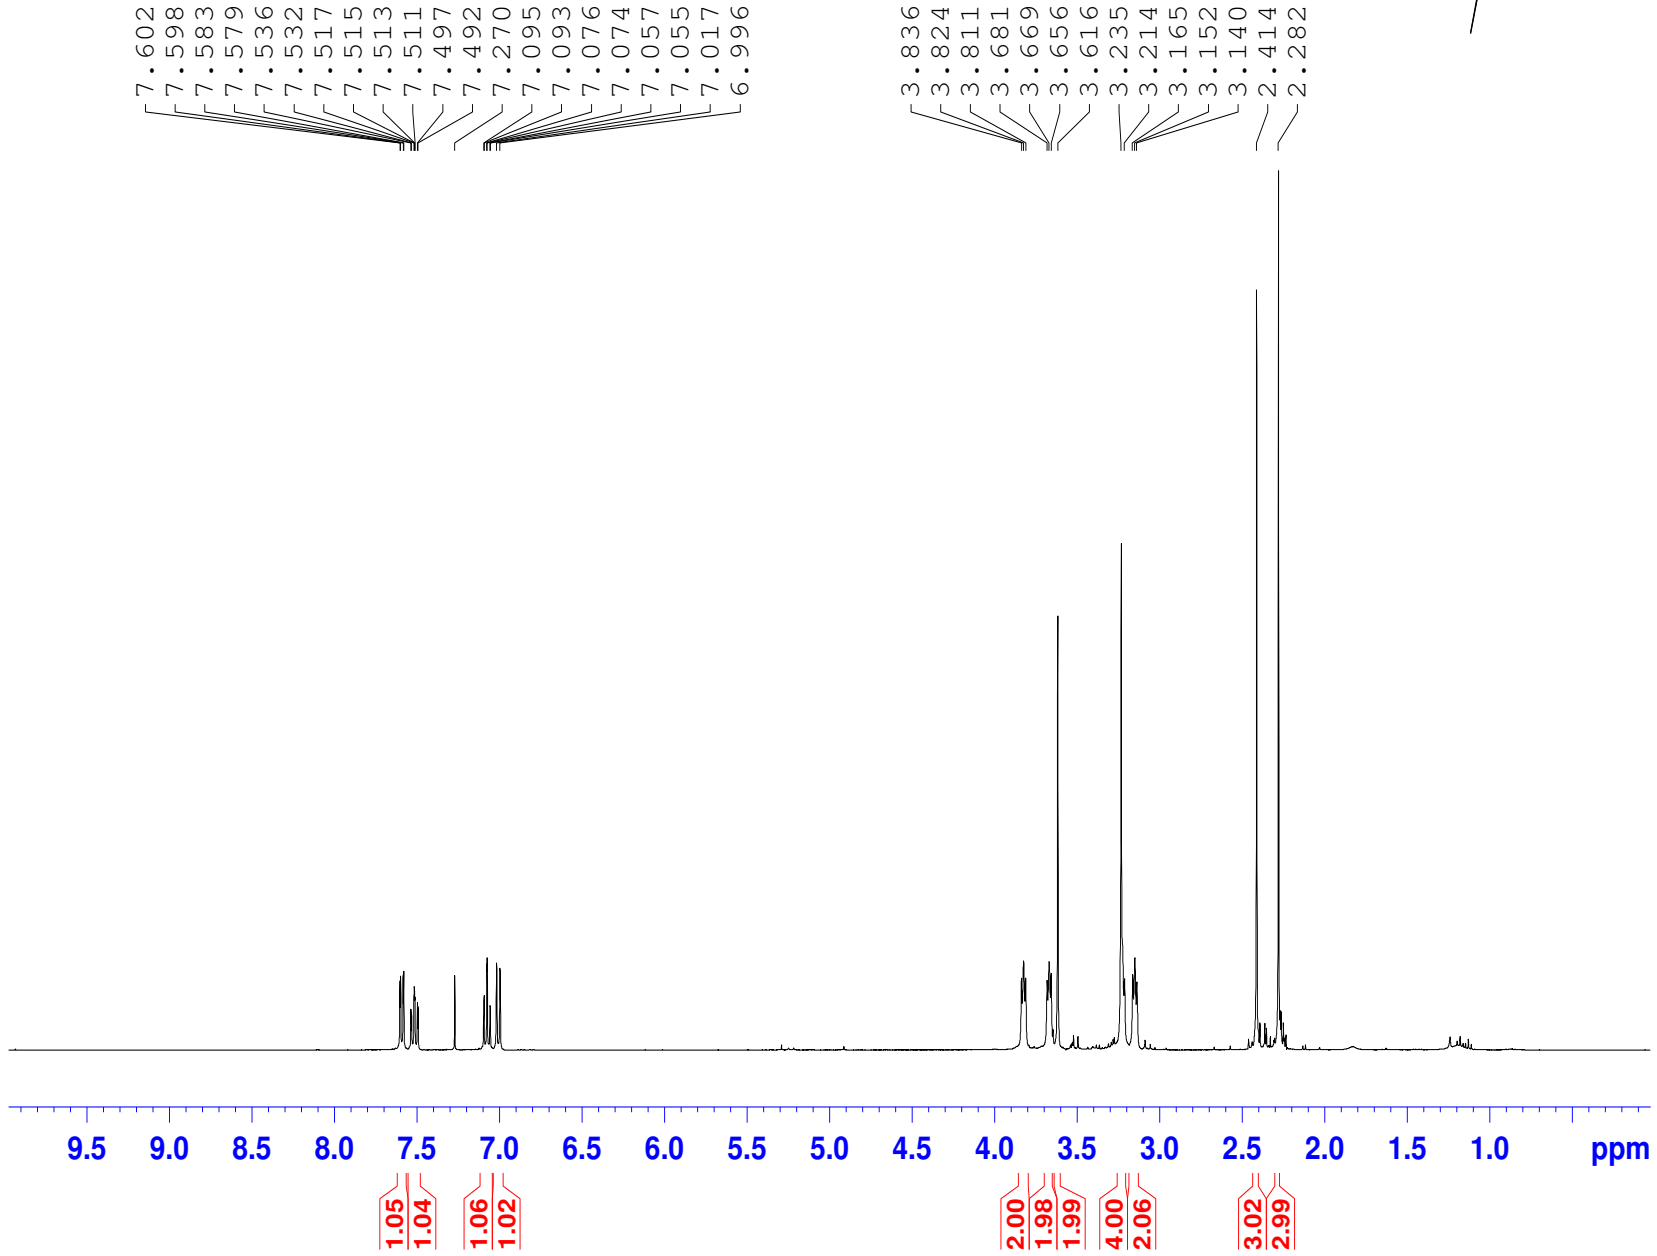

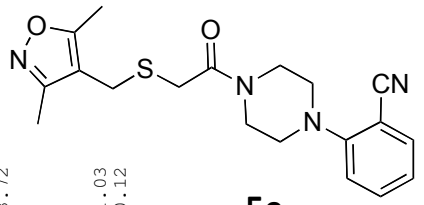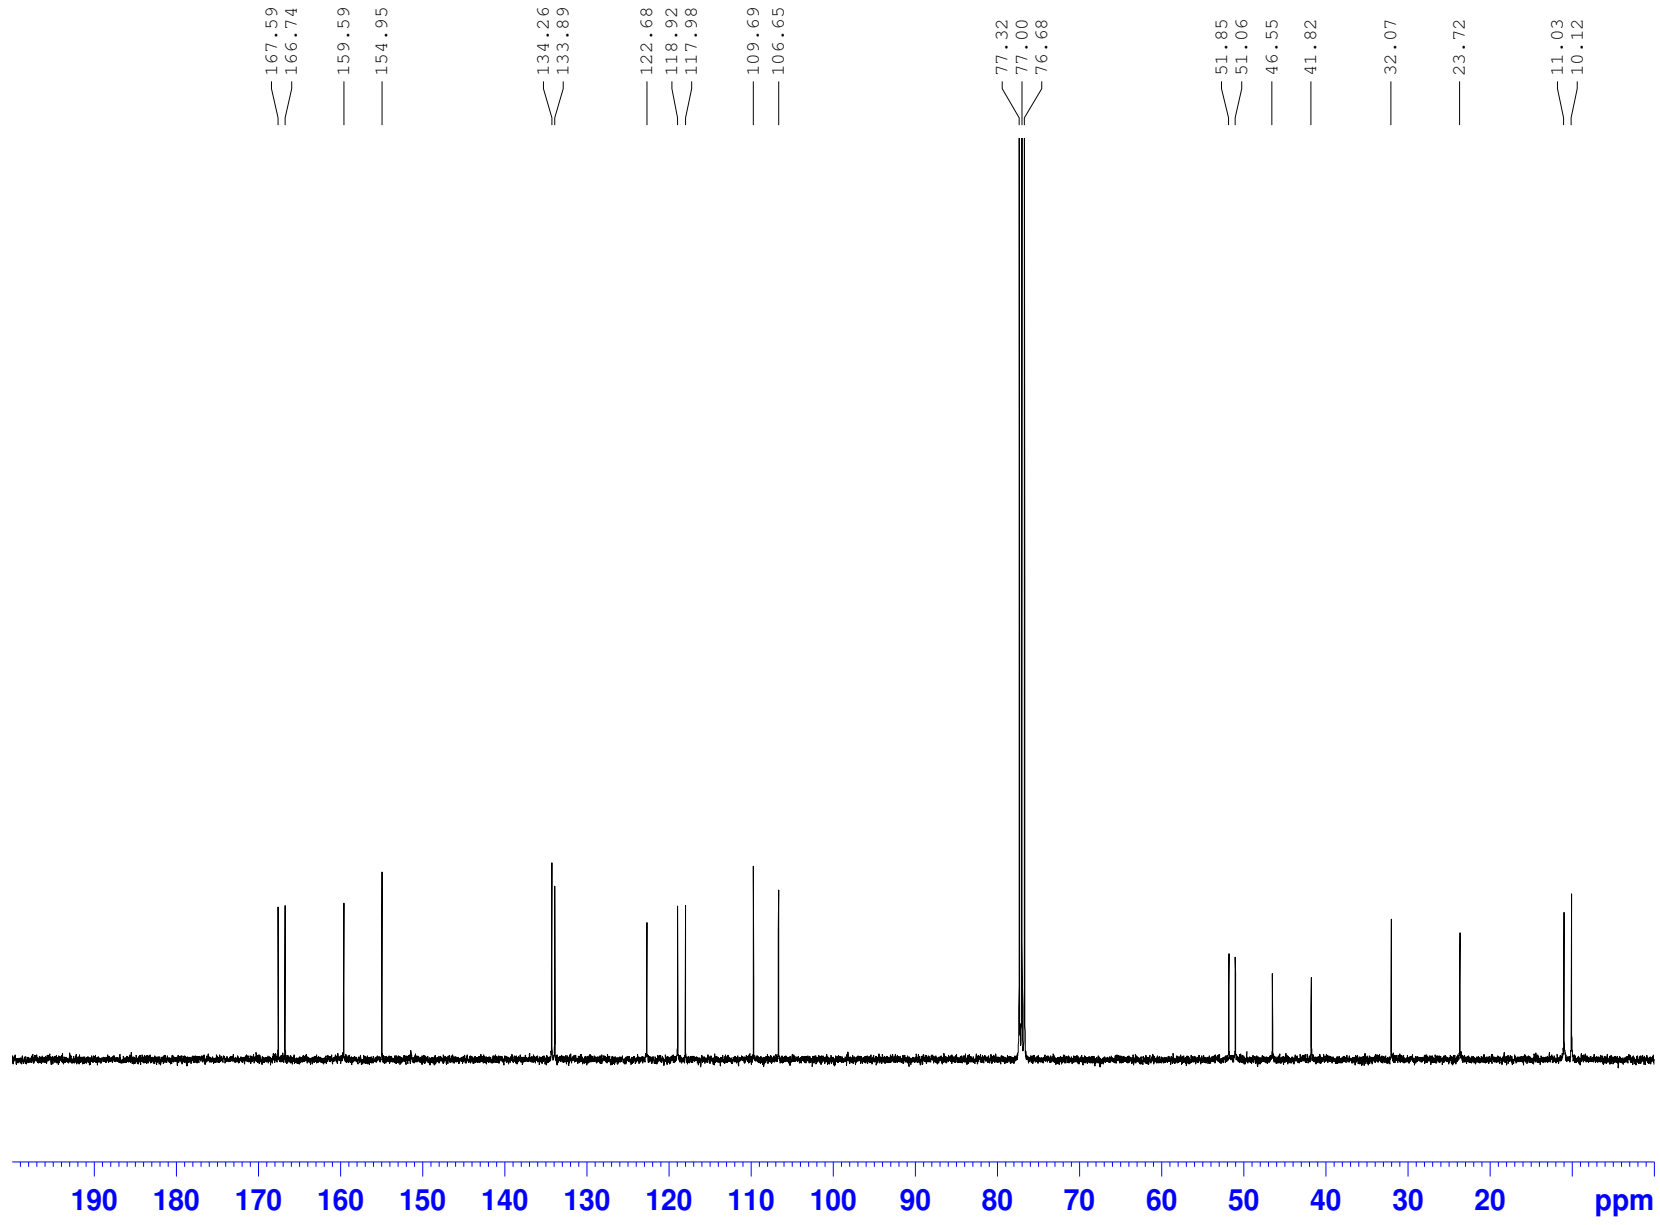





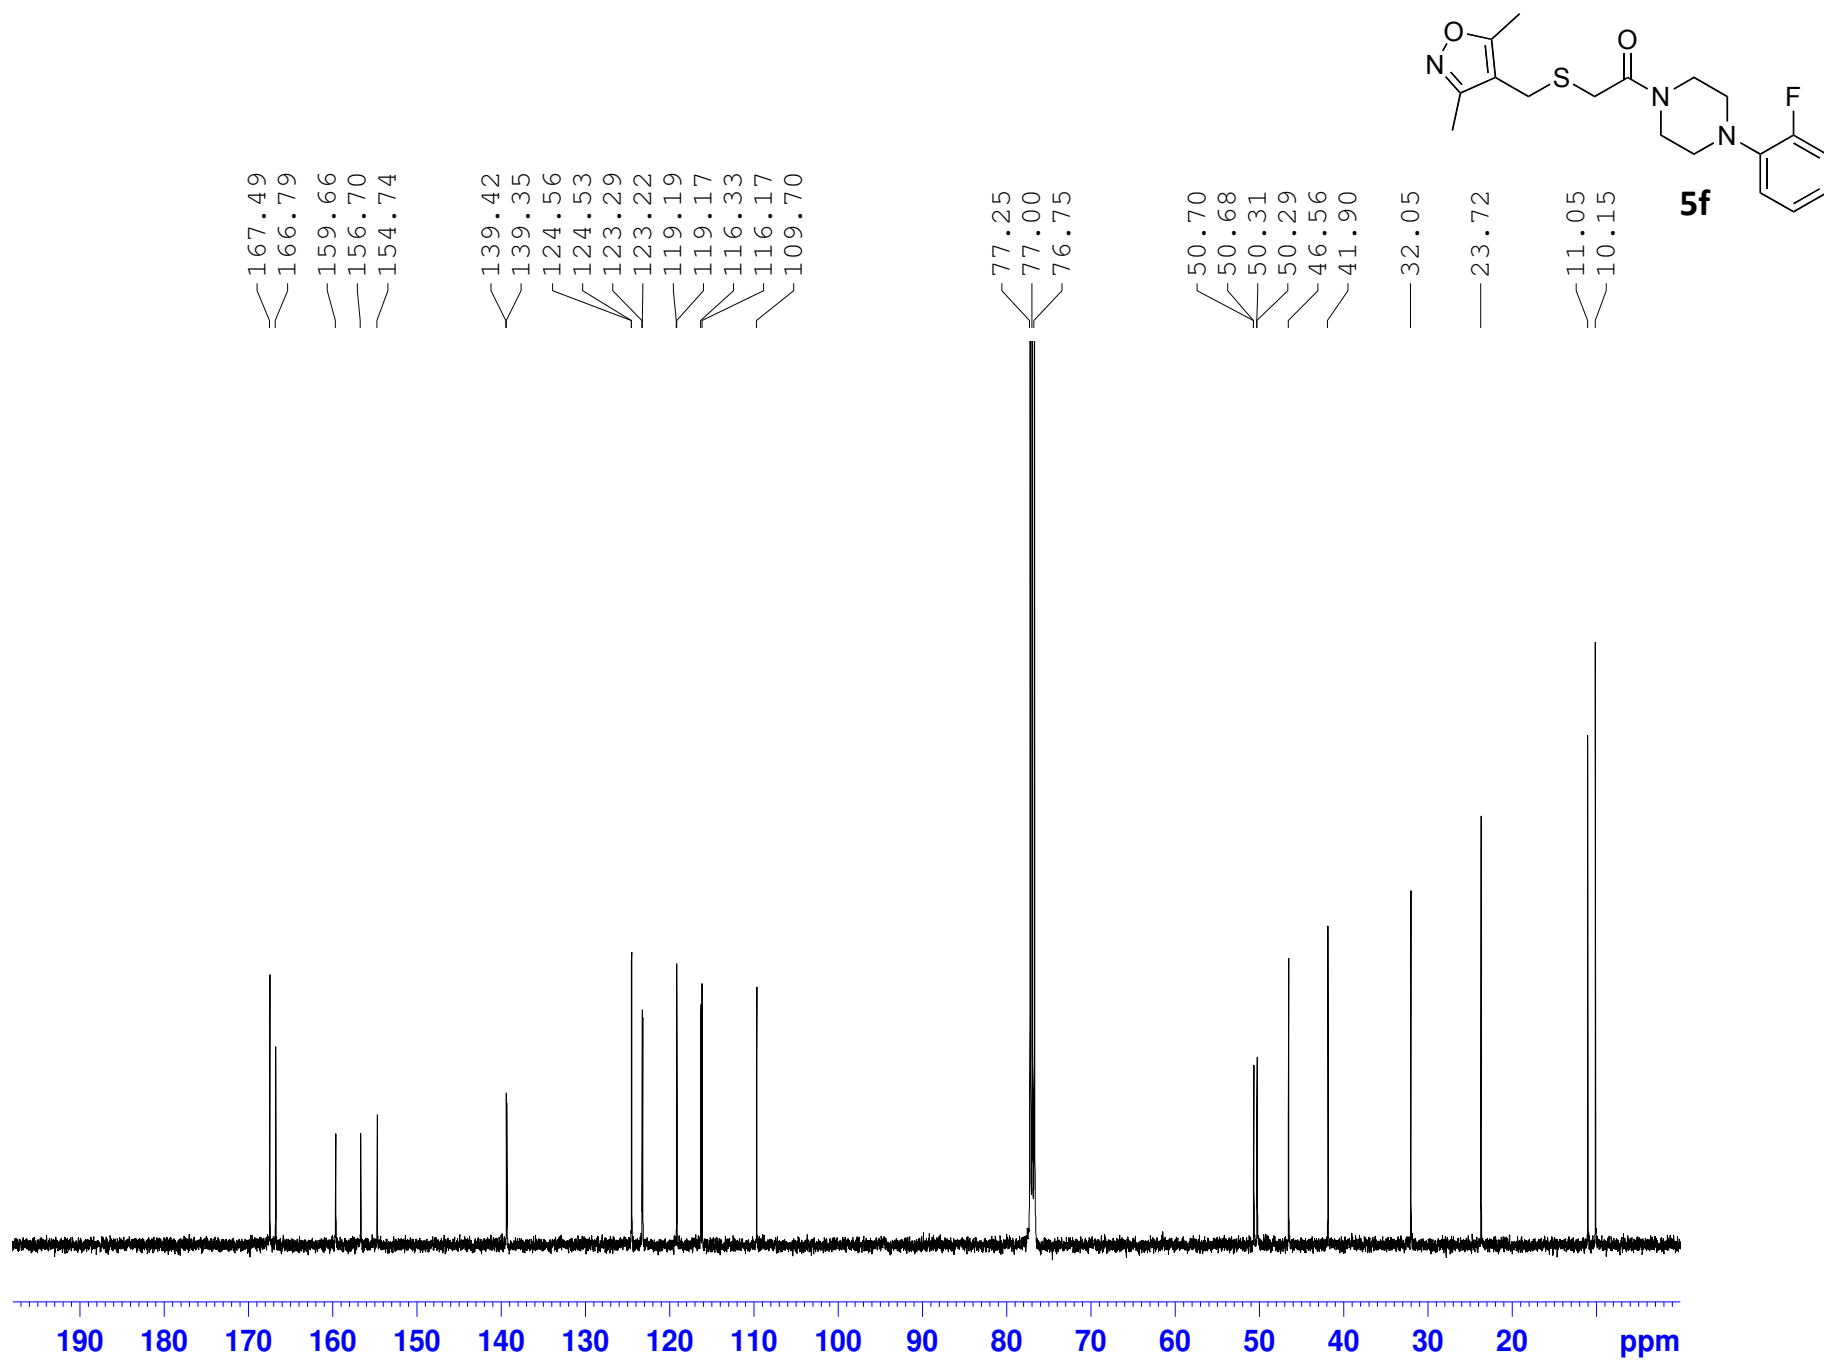

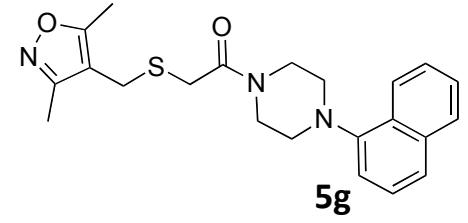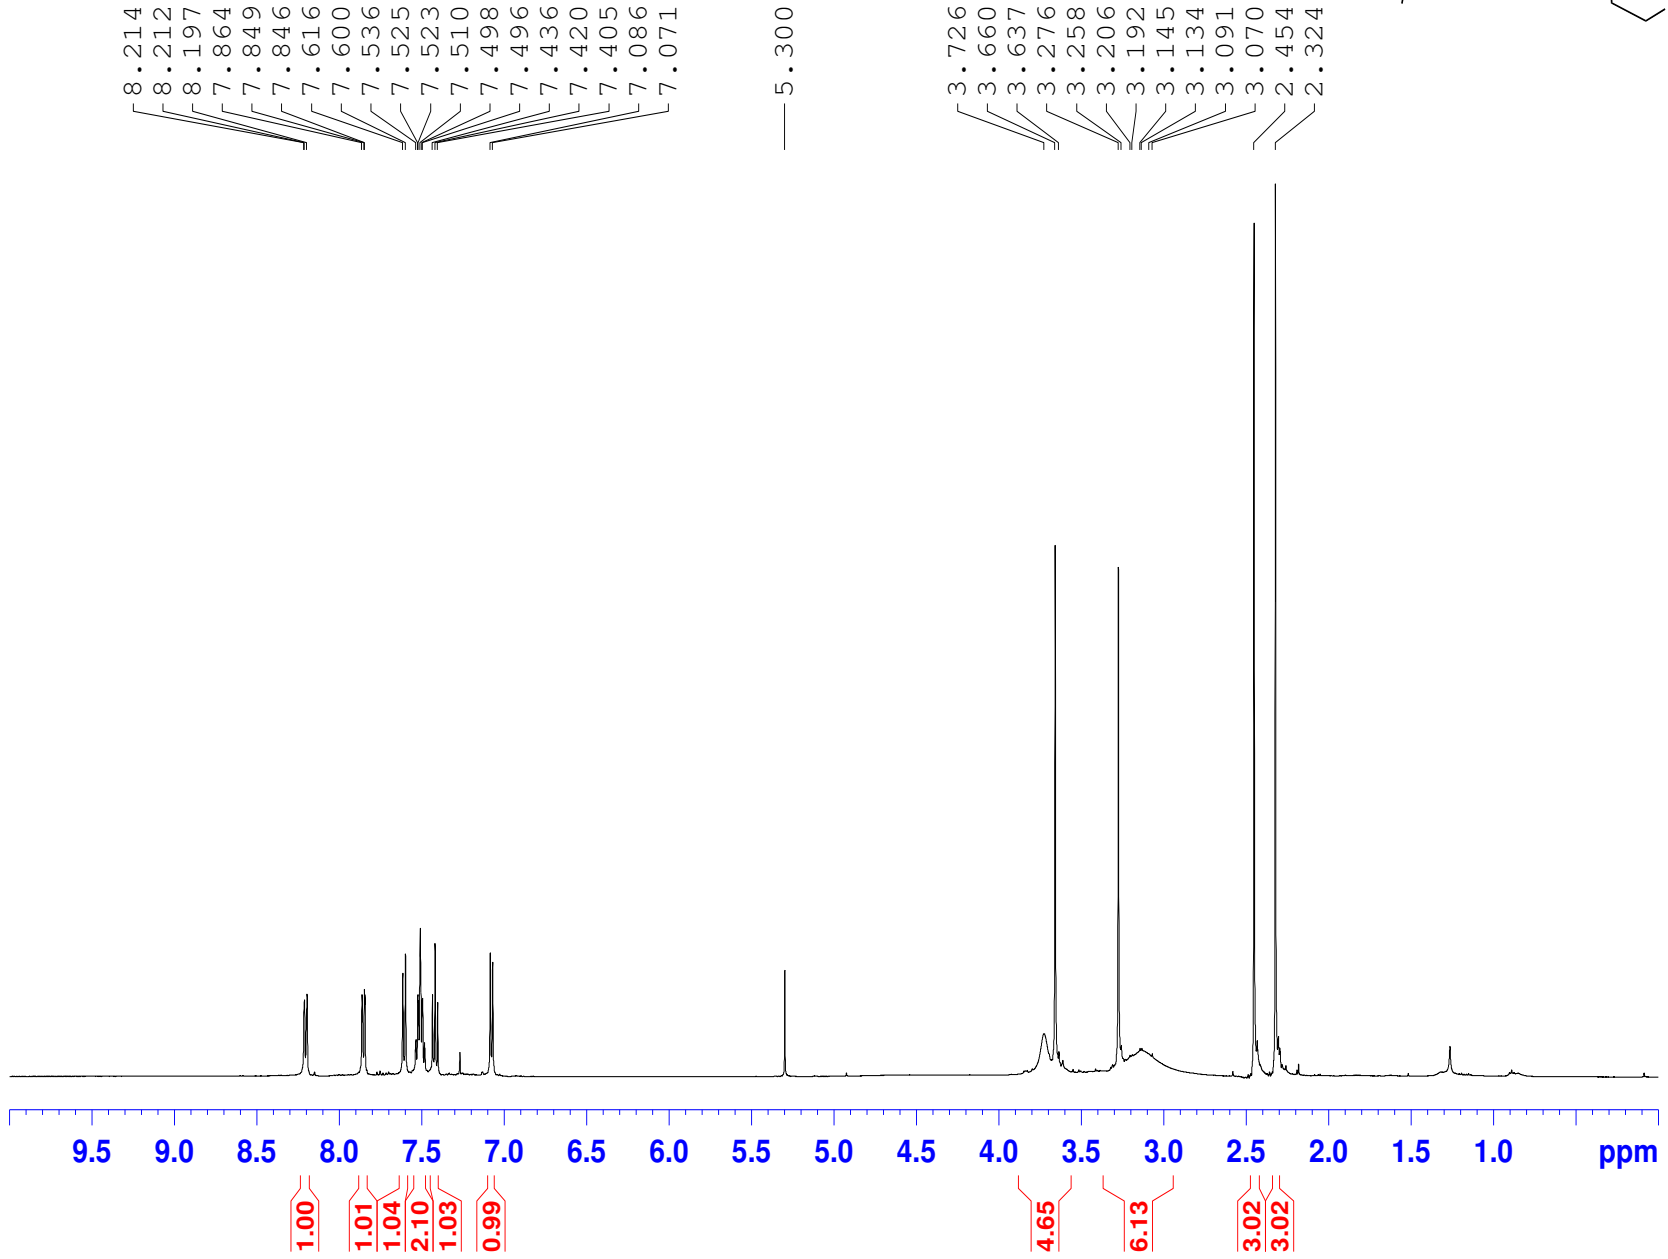

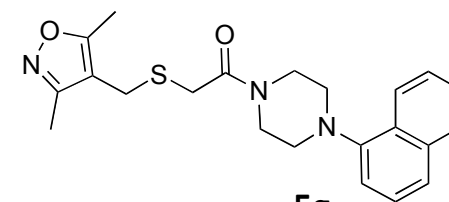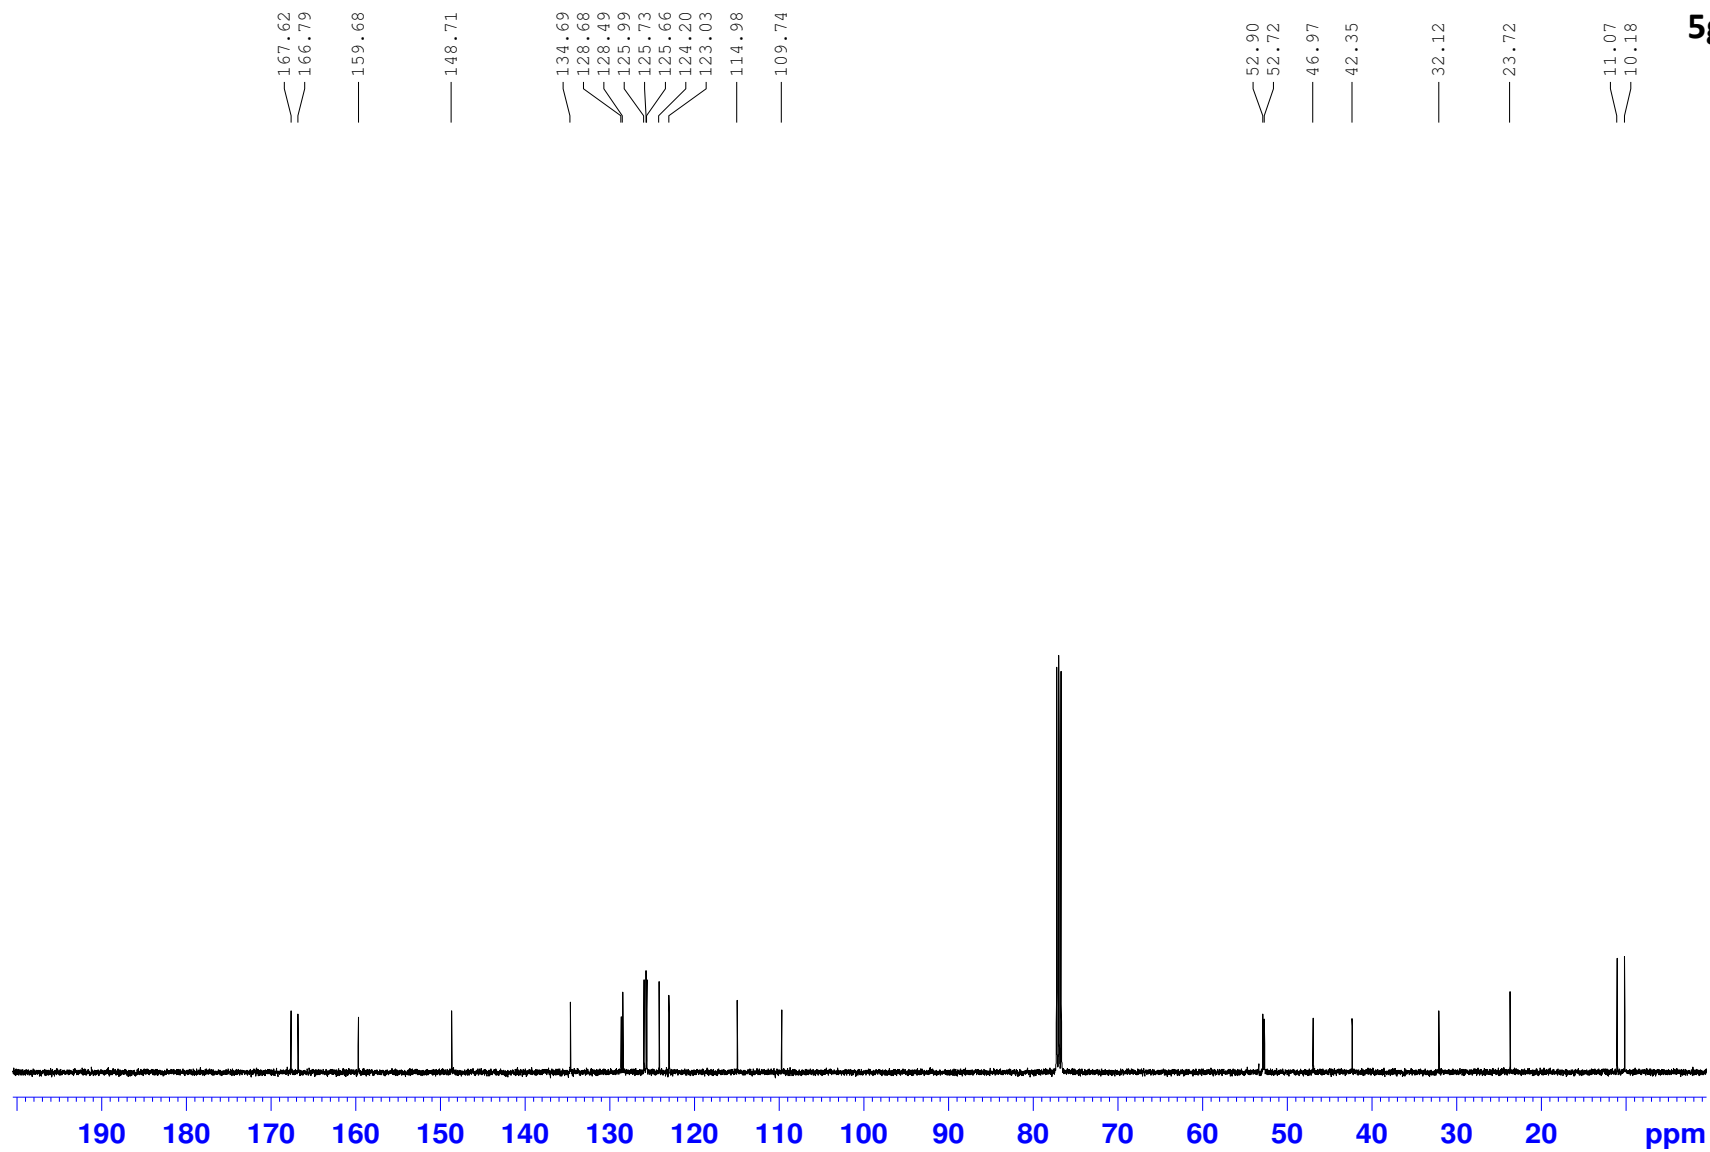

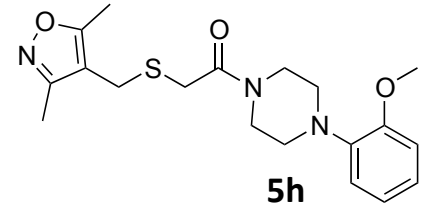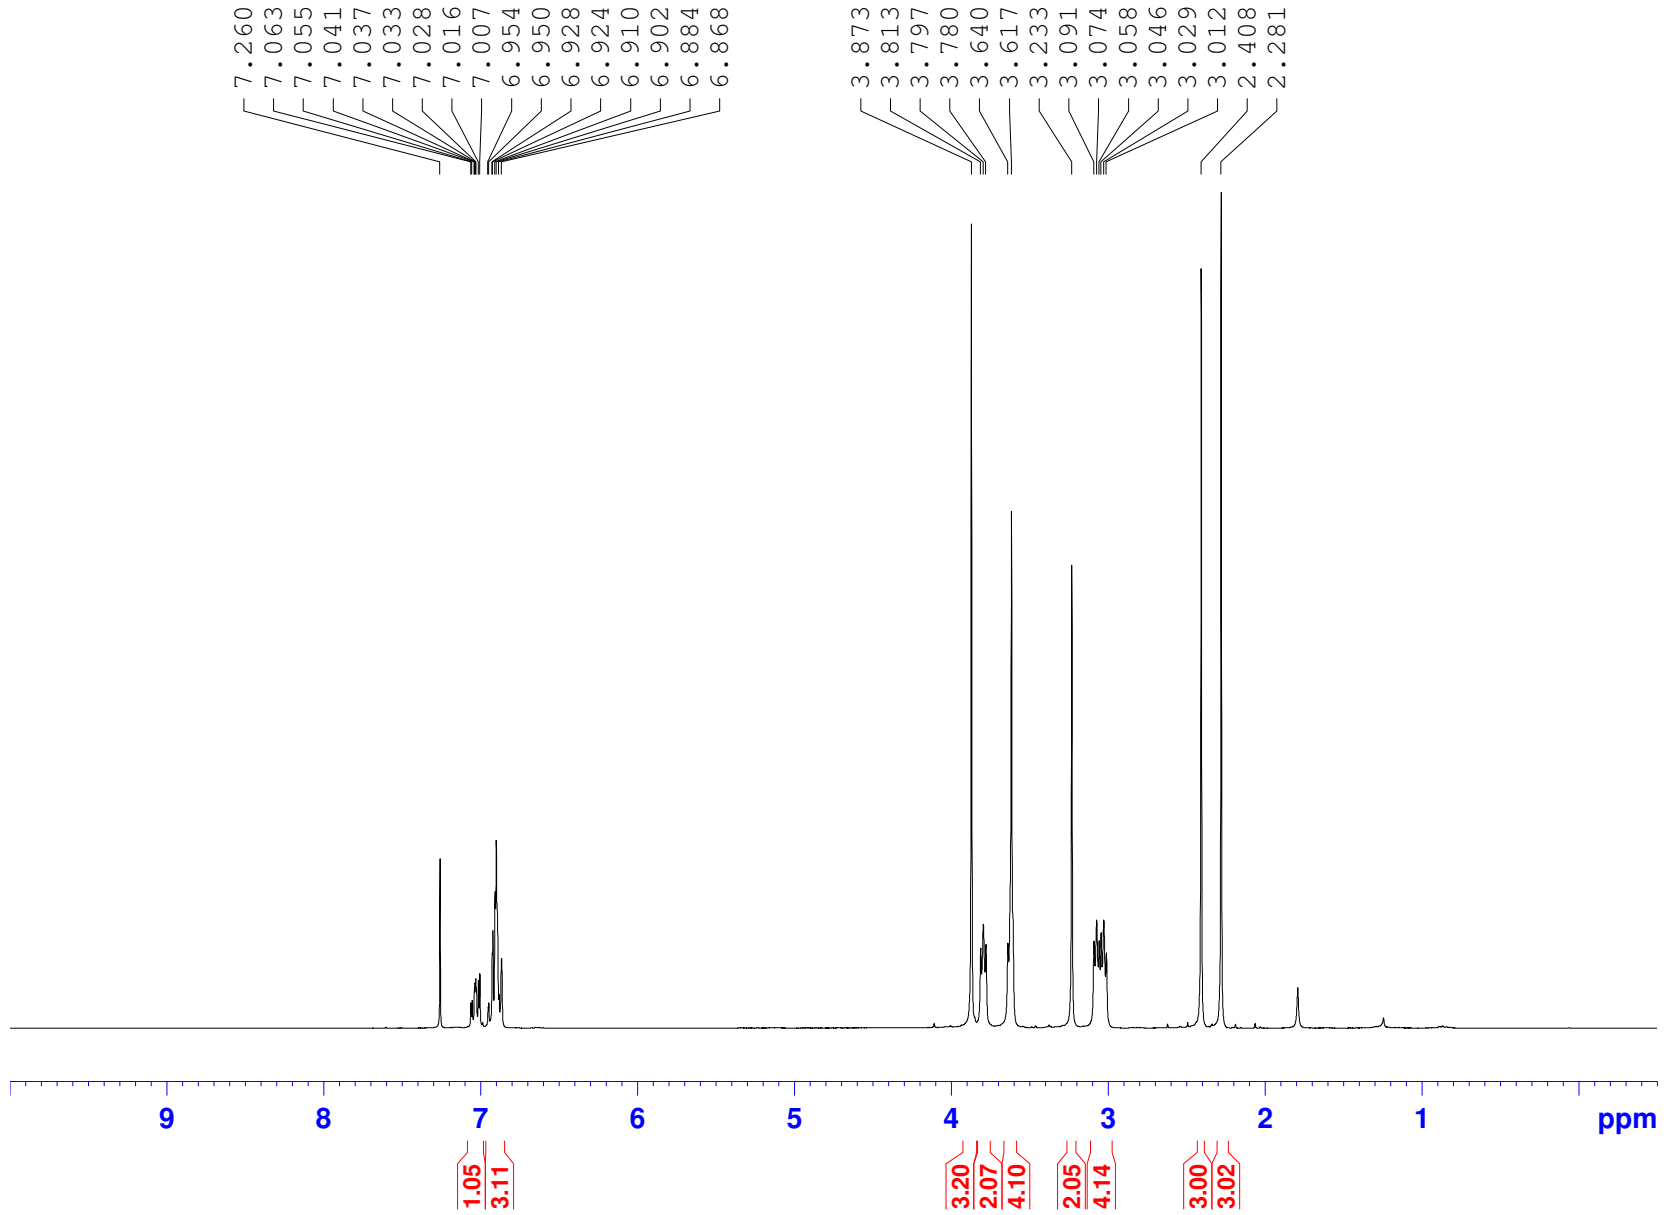

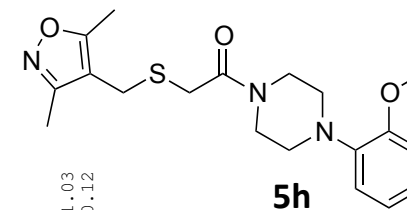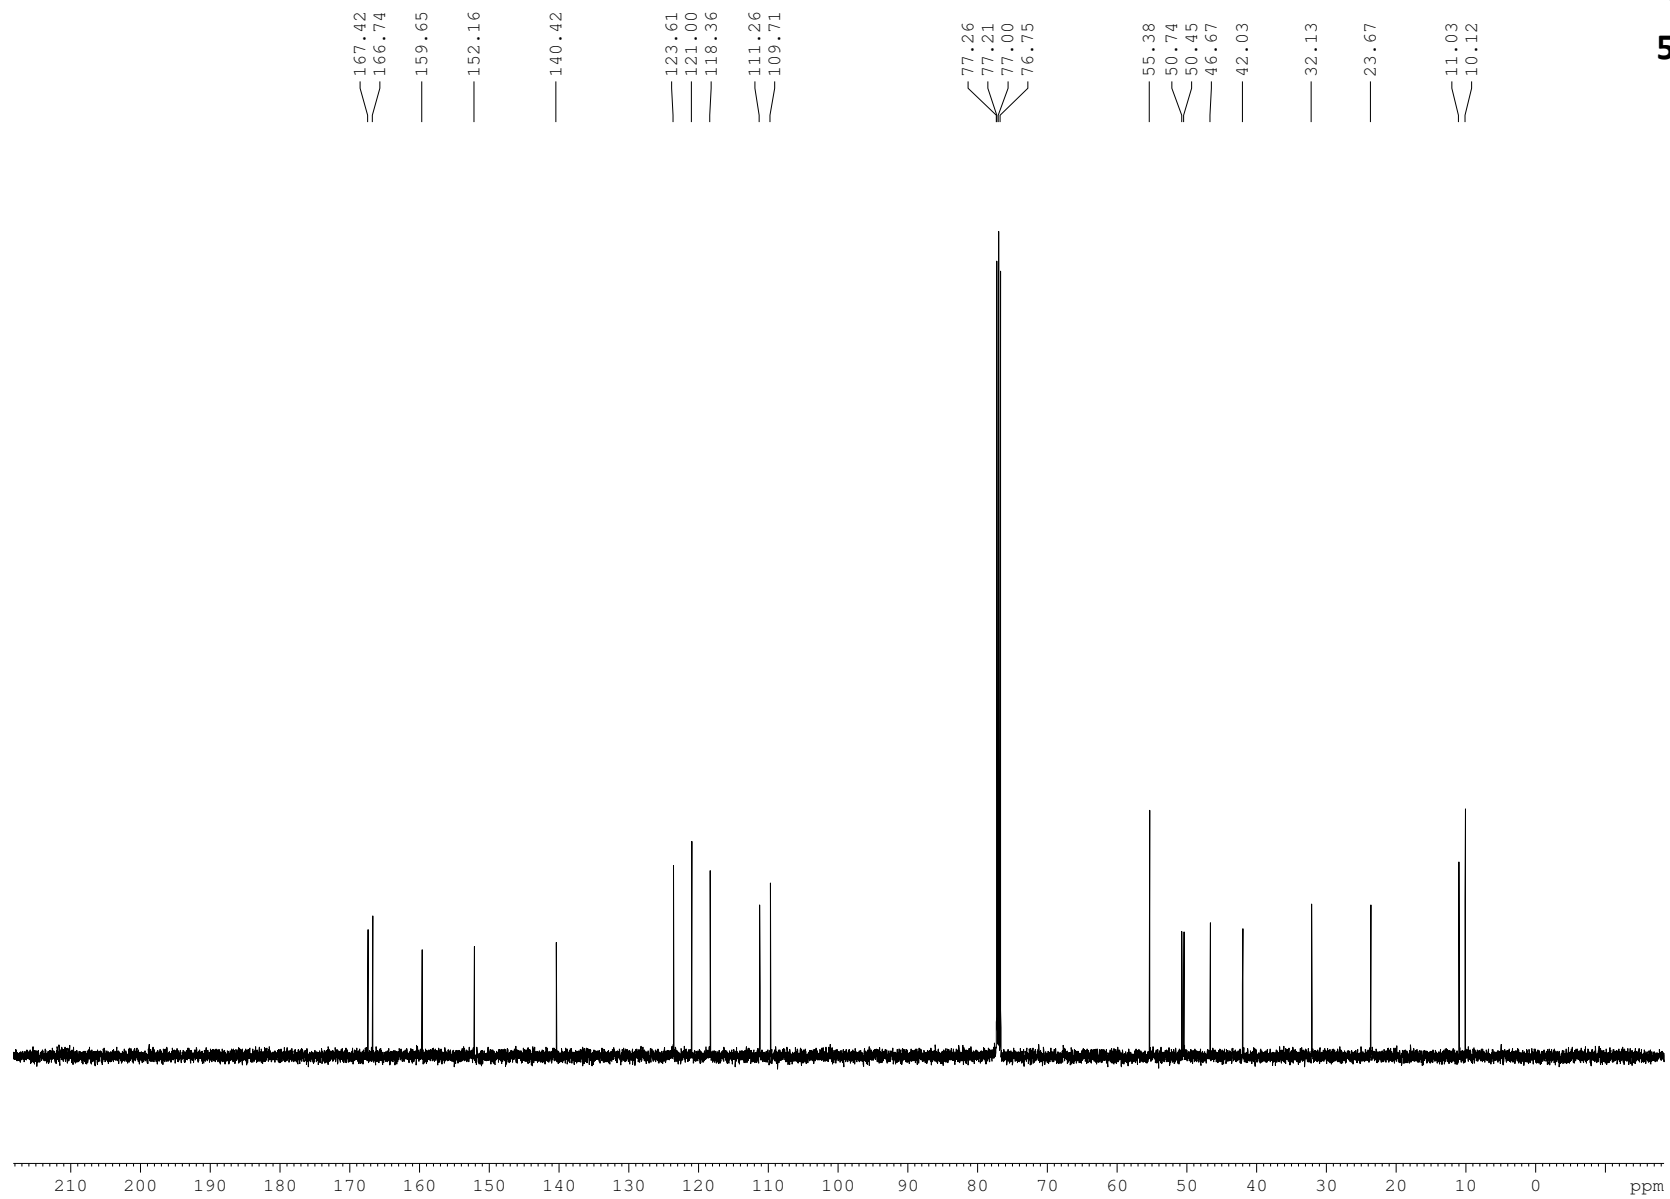

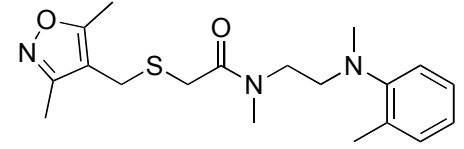**5i**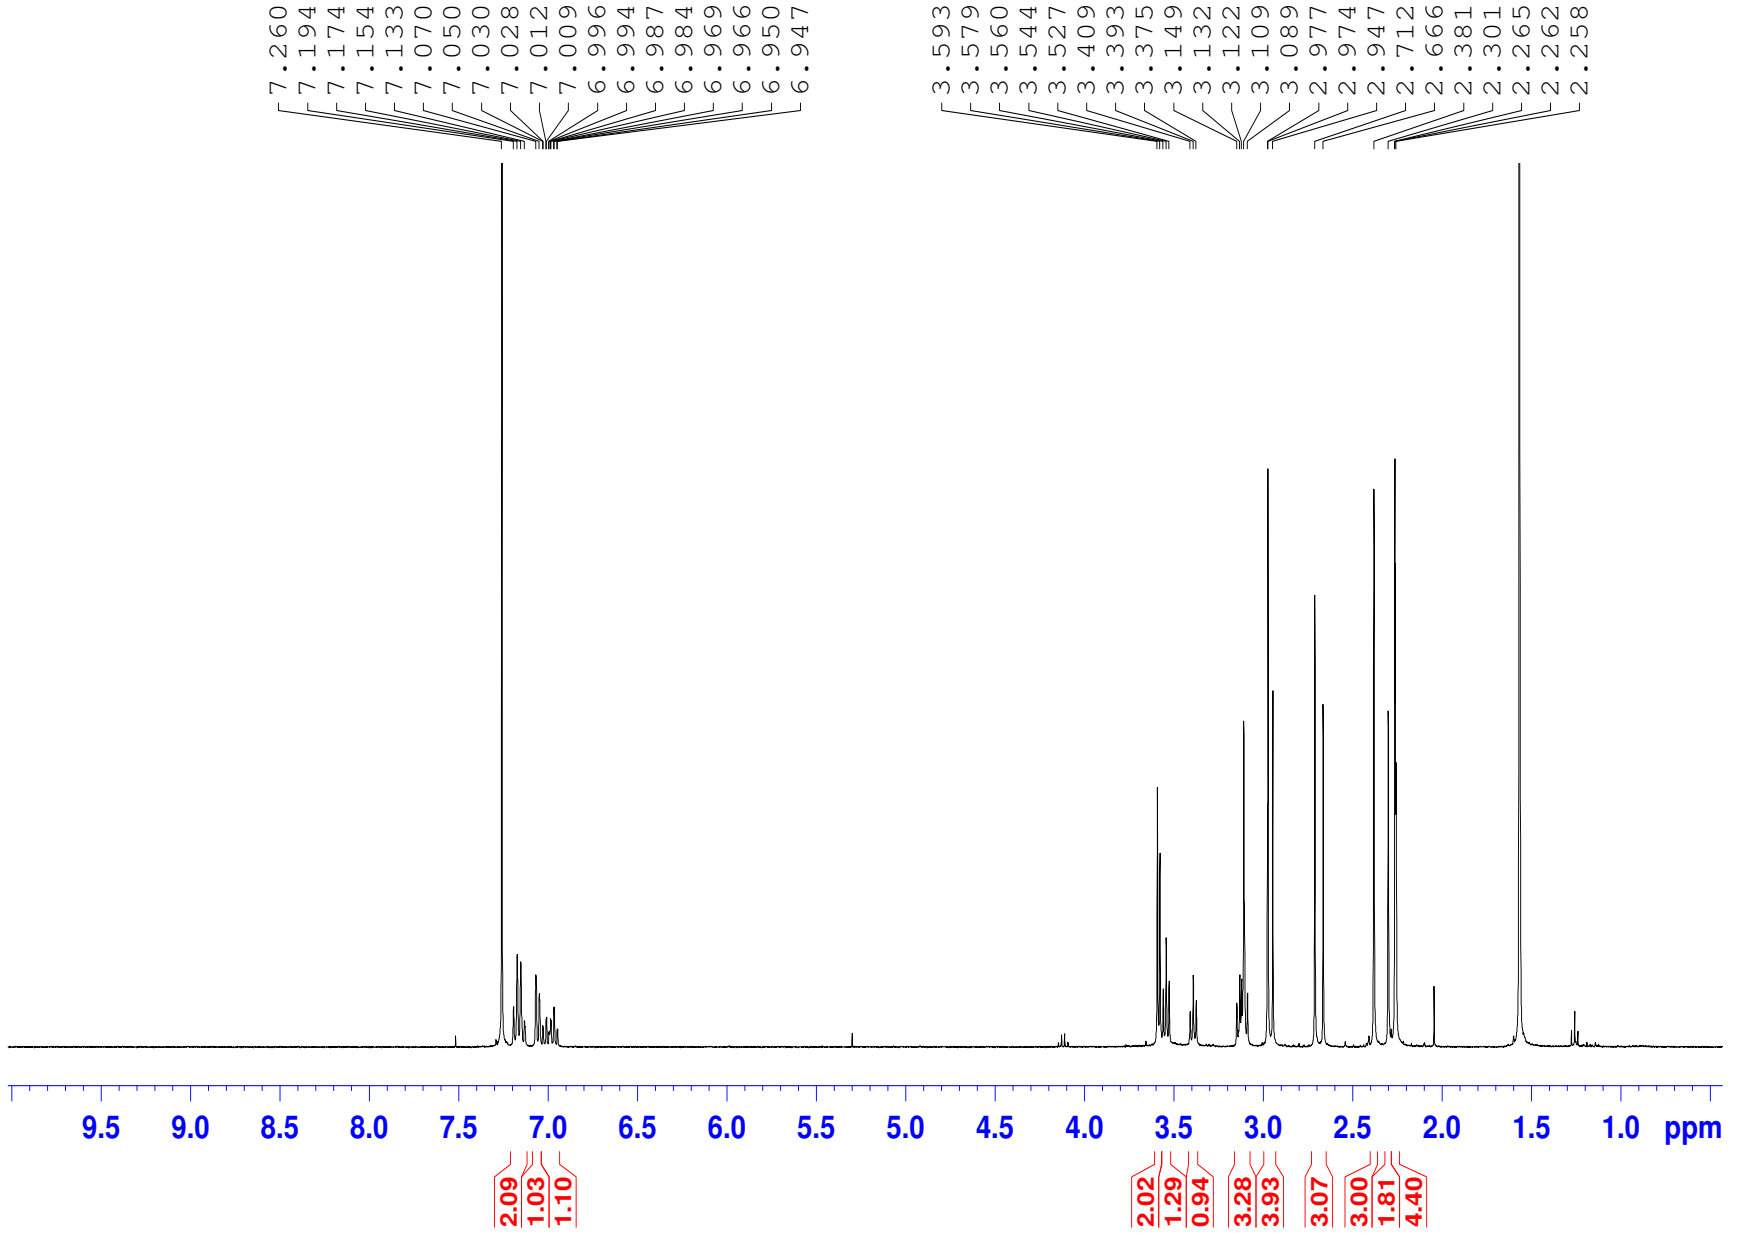

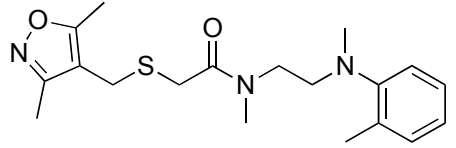

5i

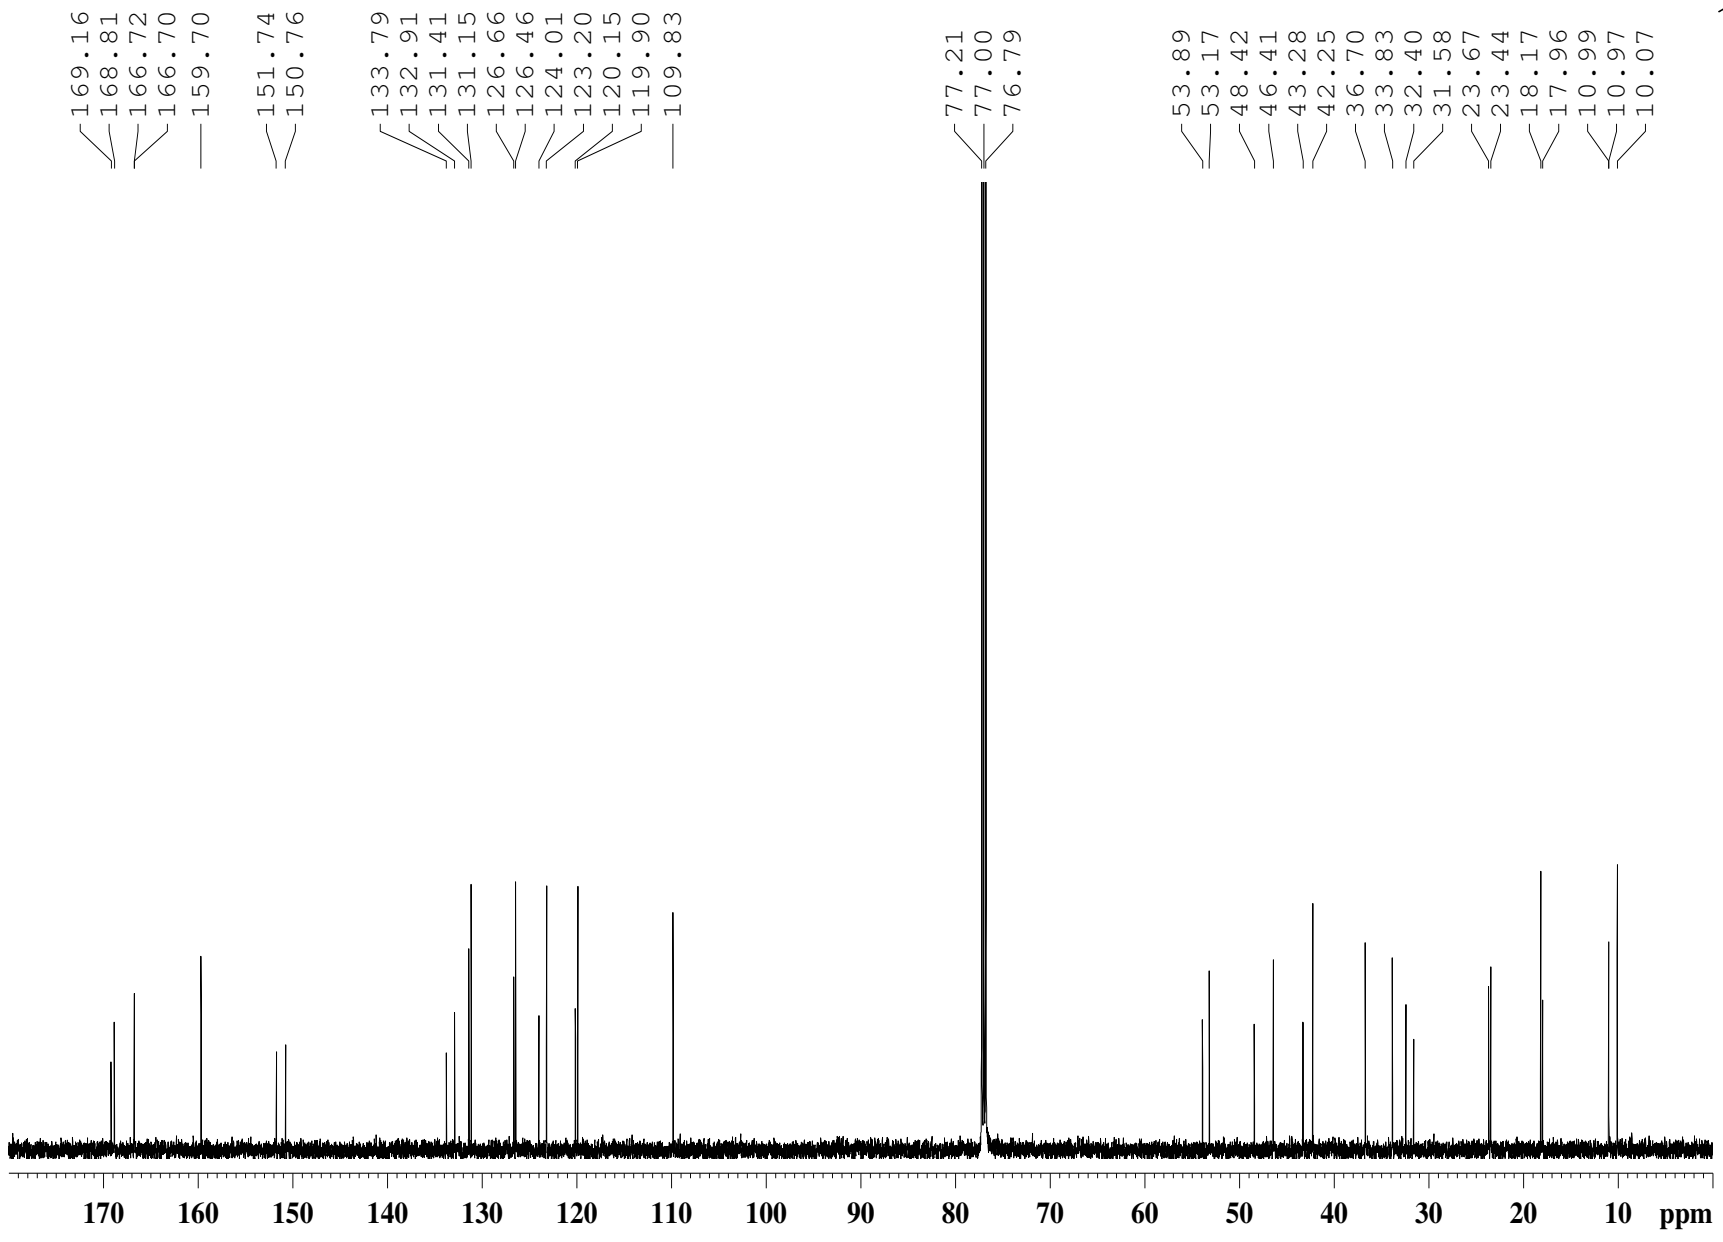

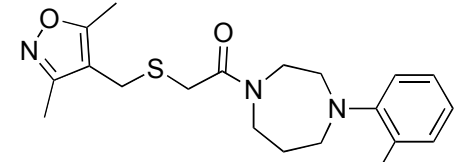**5j**

7.292  
7.211  
7.192  
7.172  
7.153  
7.062  
7.043  
7.028  
7.022  
7.009  
7.004  
6.991  
6.986

3.818  
3.802  
3.787  
3.708  
3.700  
3.685  
3.668  
3.655  
3.243  
3.227  
3.210  
3.165  
3.152  
3.140  
3.121  
3.103  
3.092  
3.074  
2.490  
2.464  
2.458  
2.438  
2.332  
2.322  
2.082  
2.067  
2.052  
2.037  
2.018

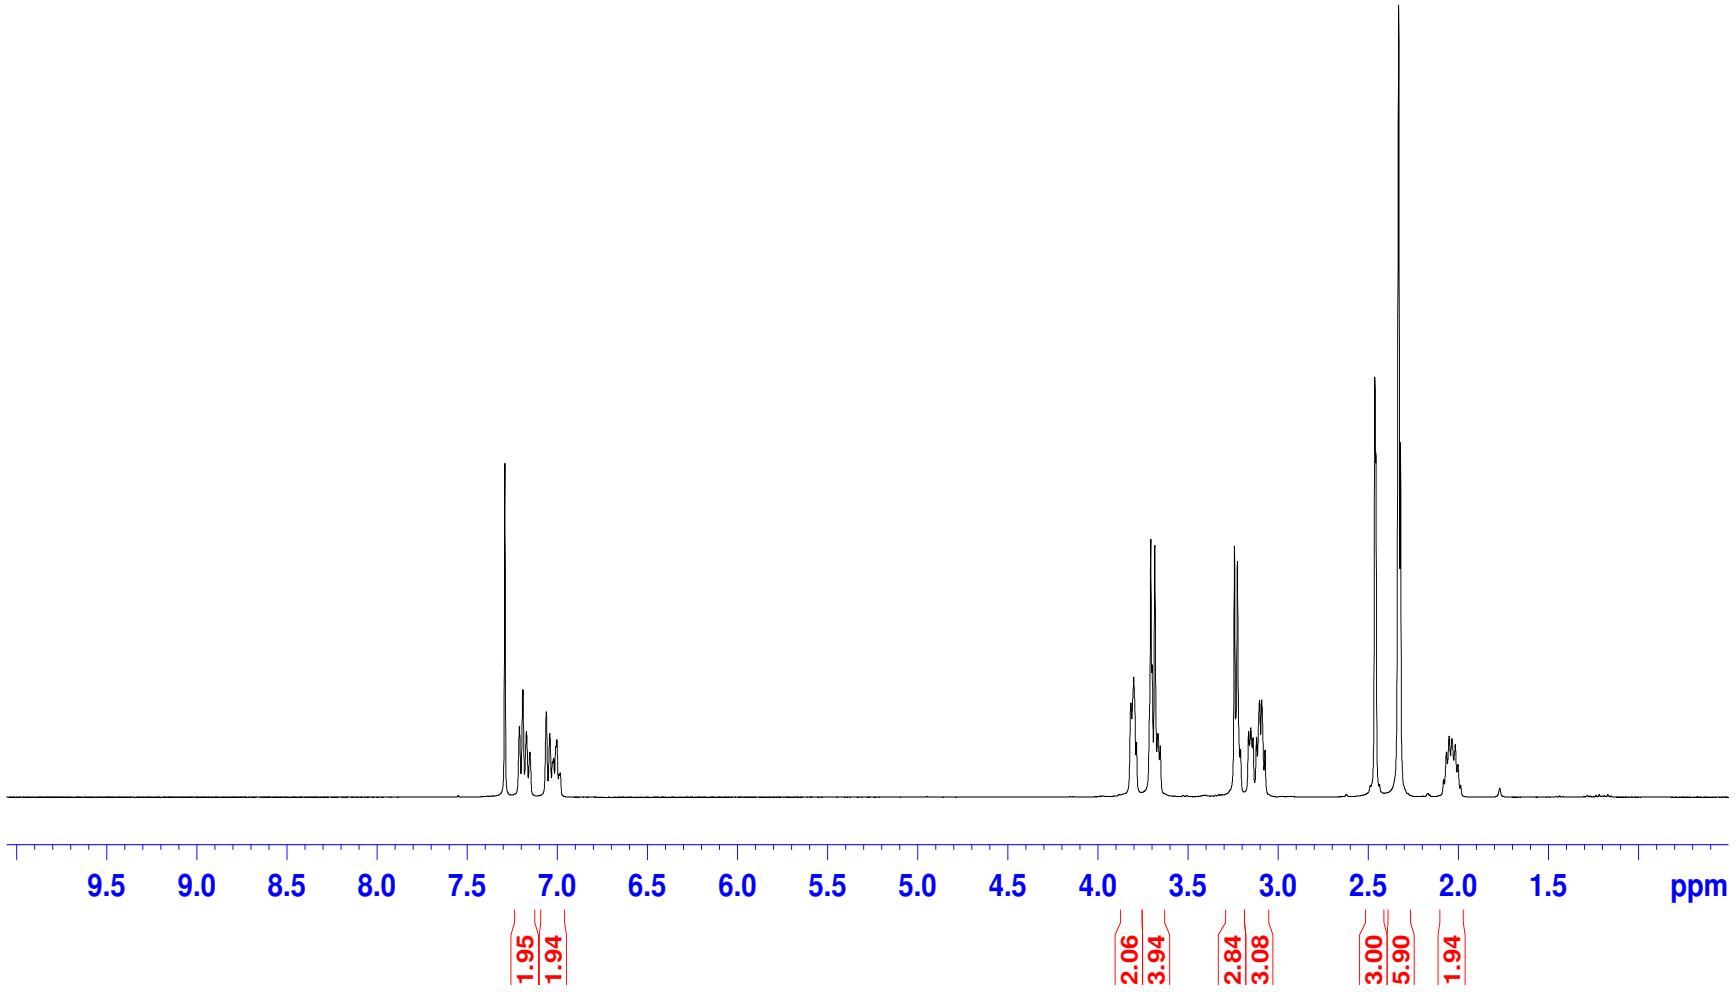



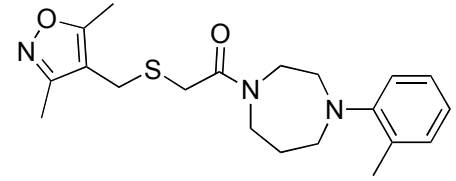**5j**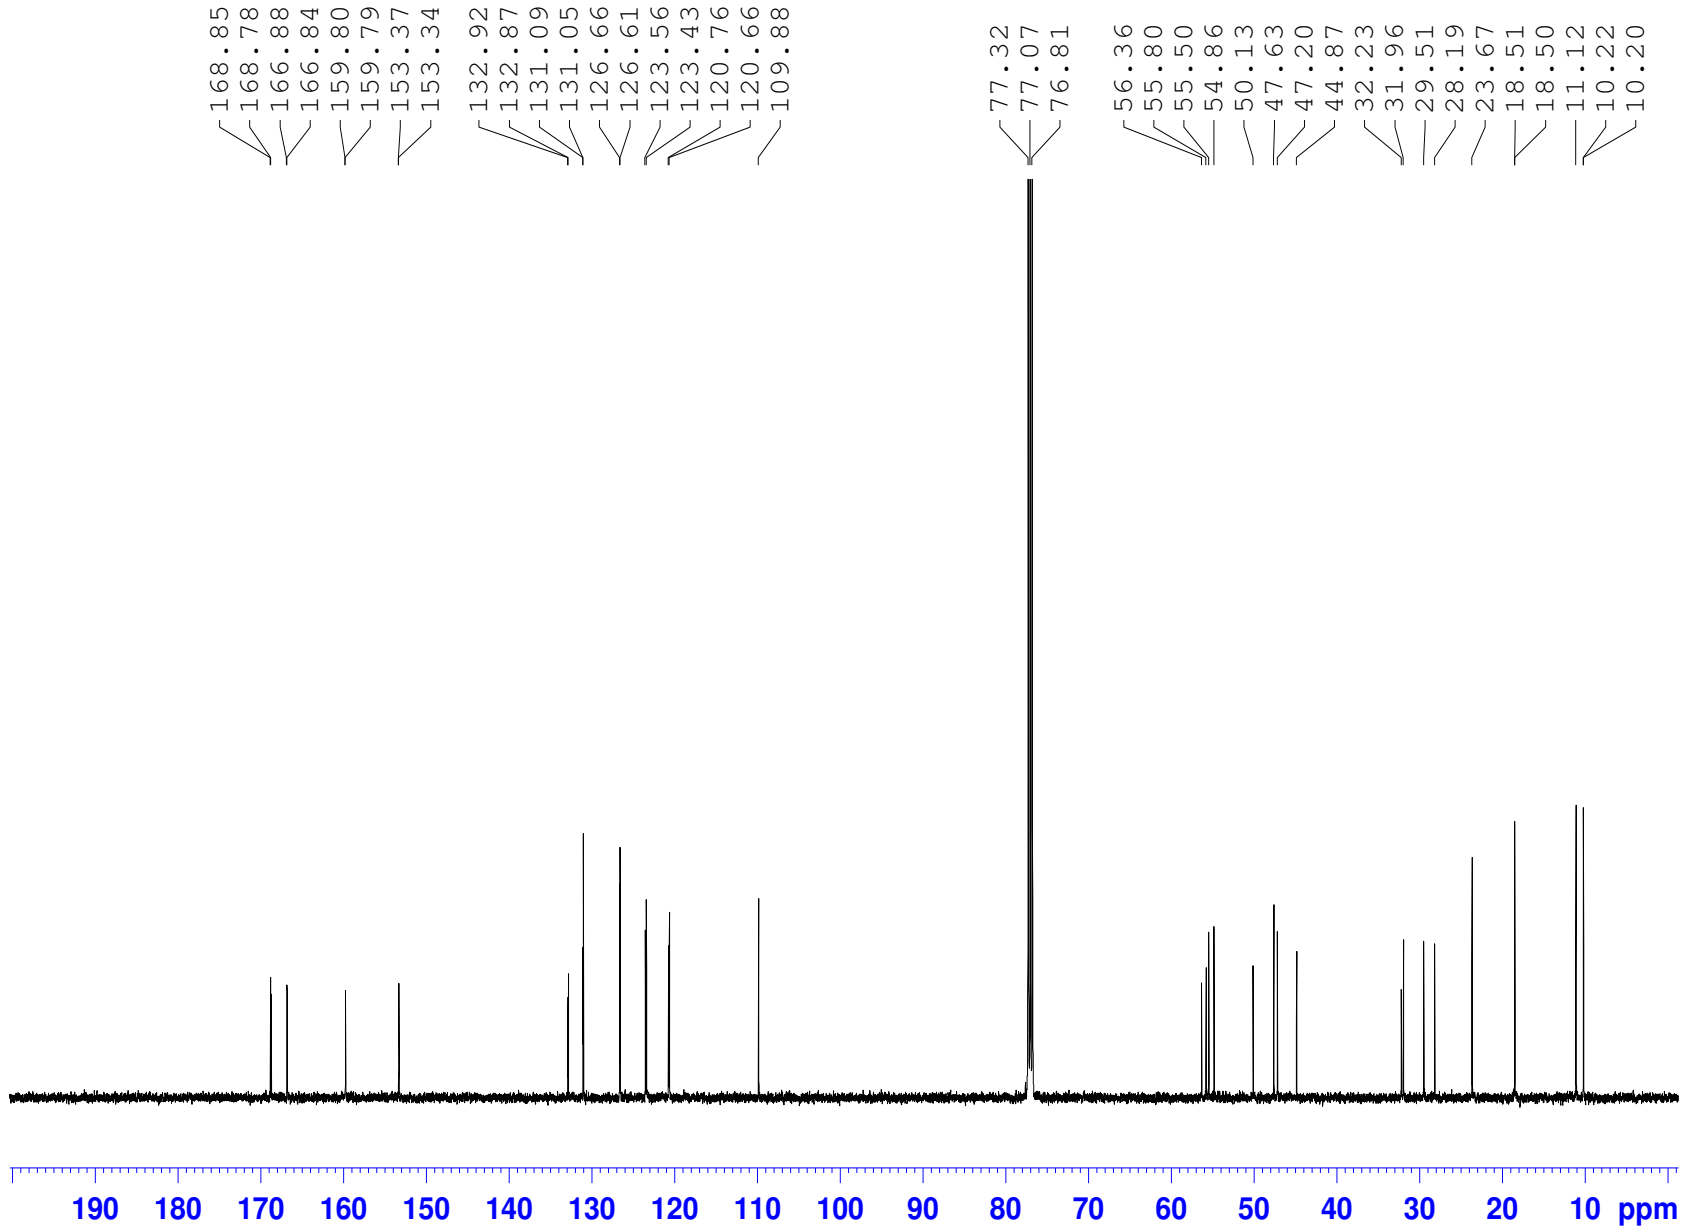

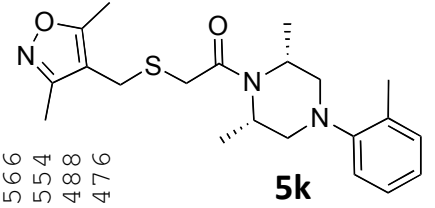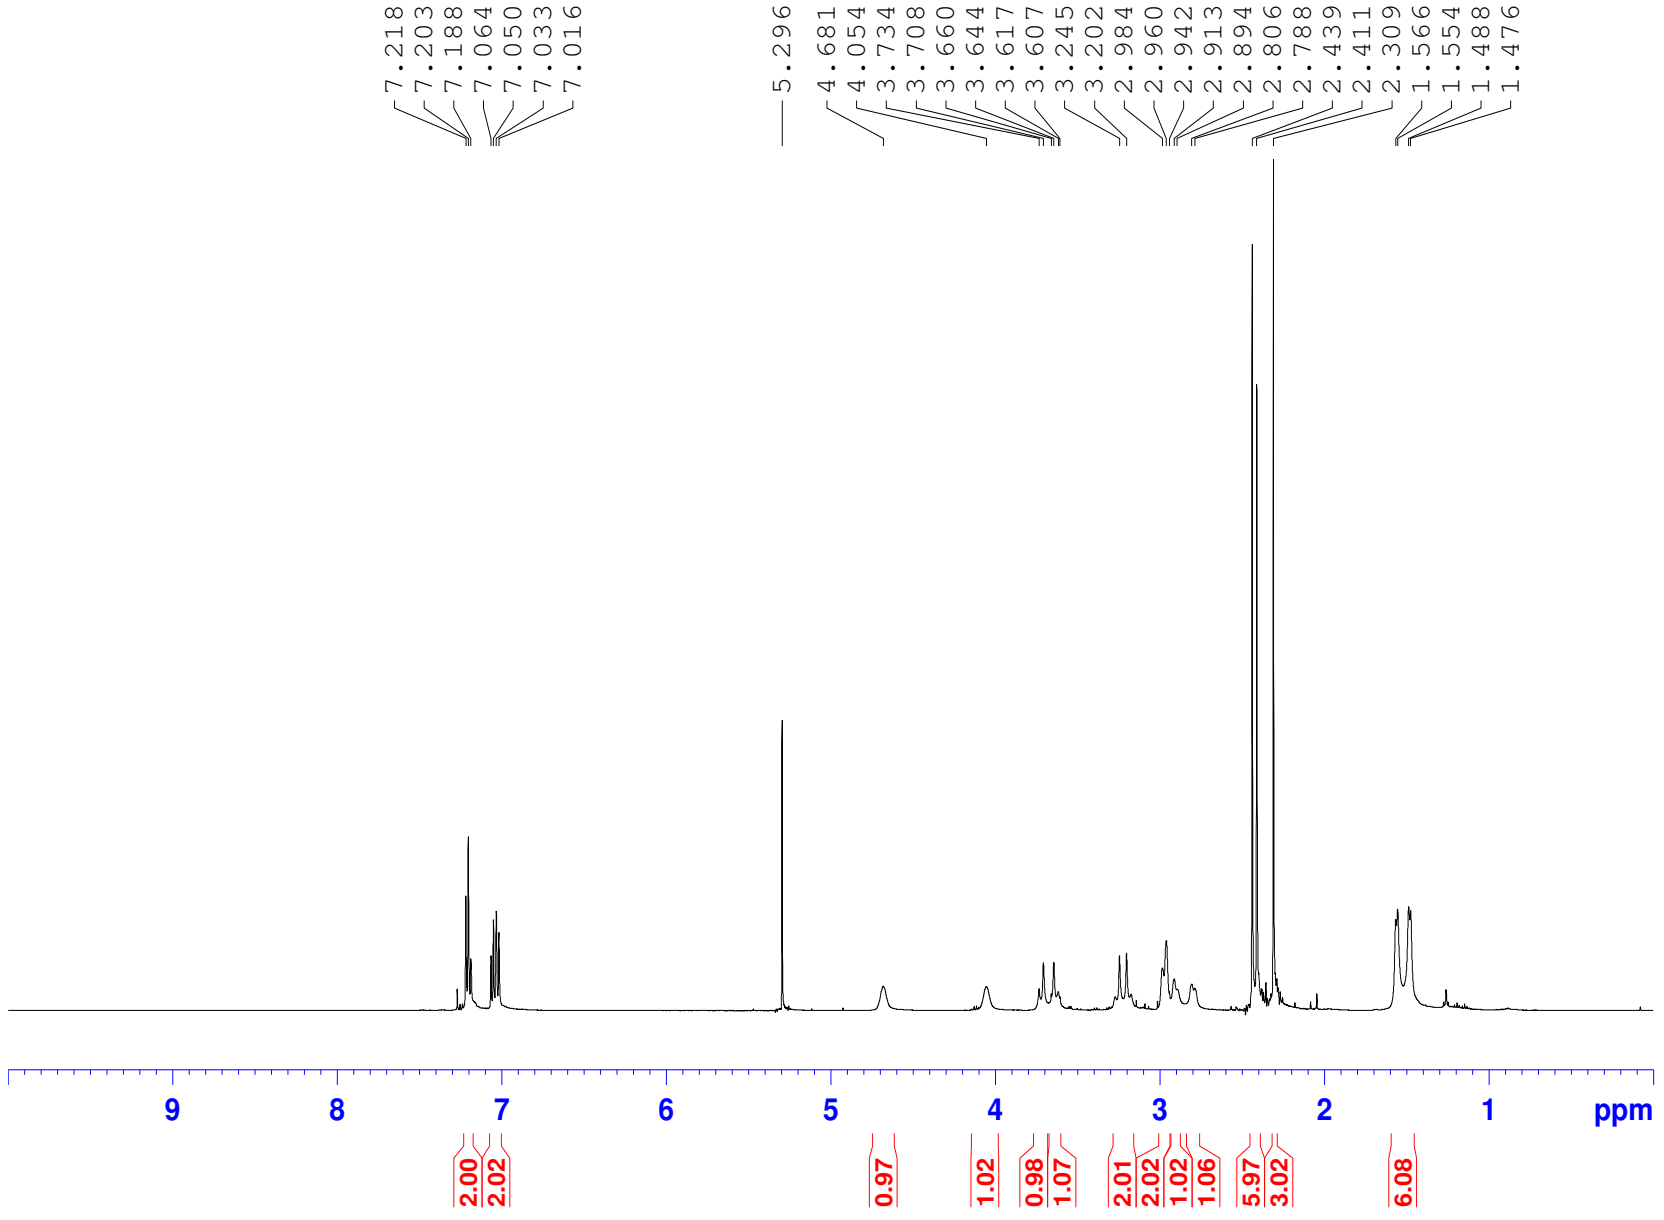

S67

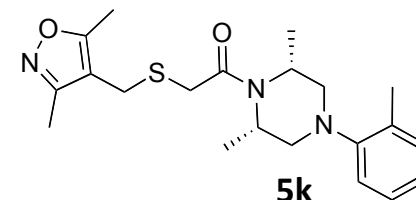

5k

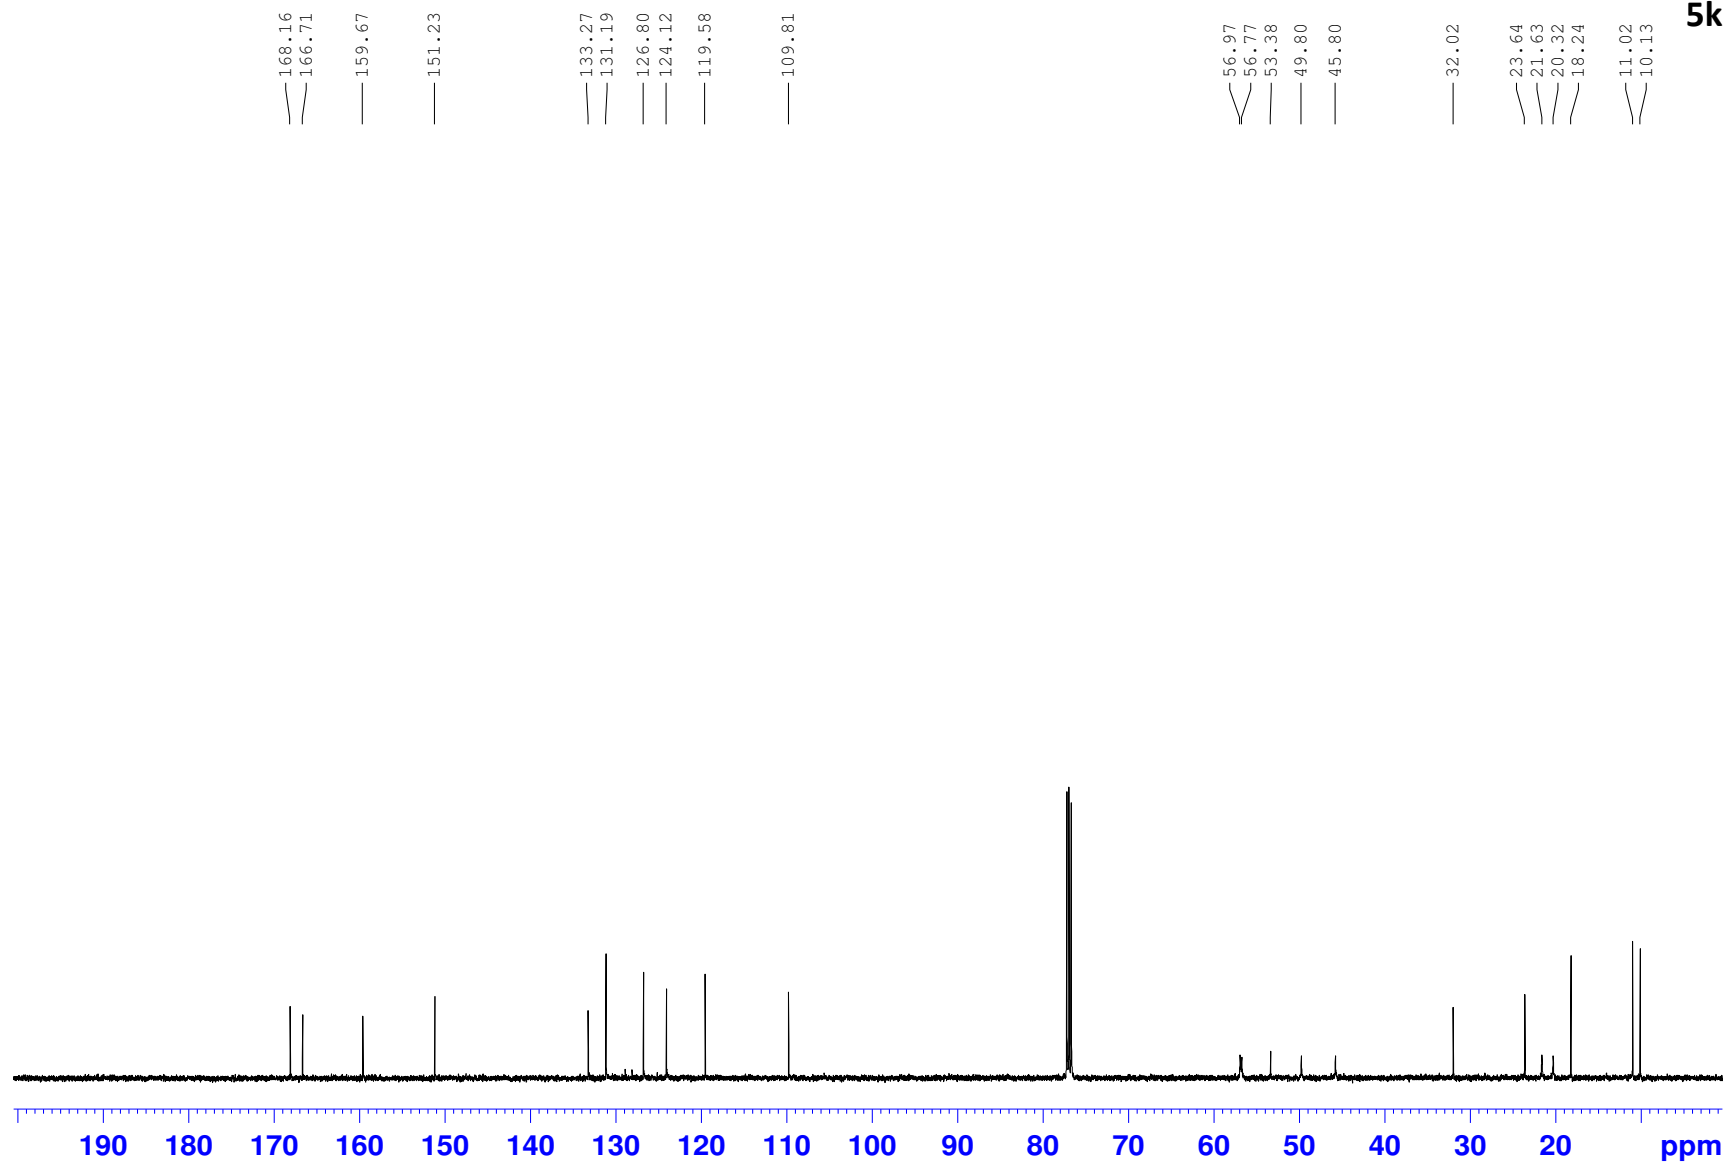

S68

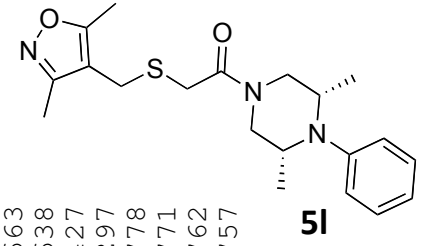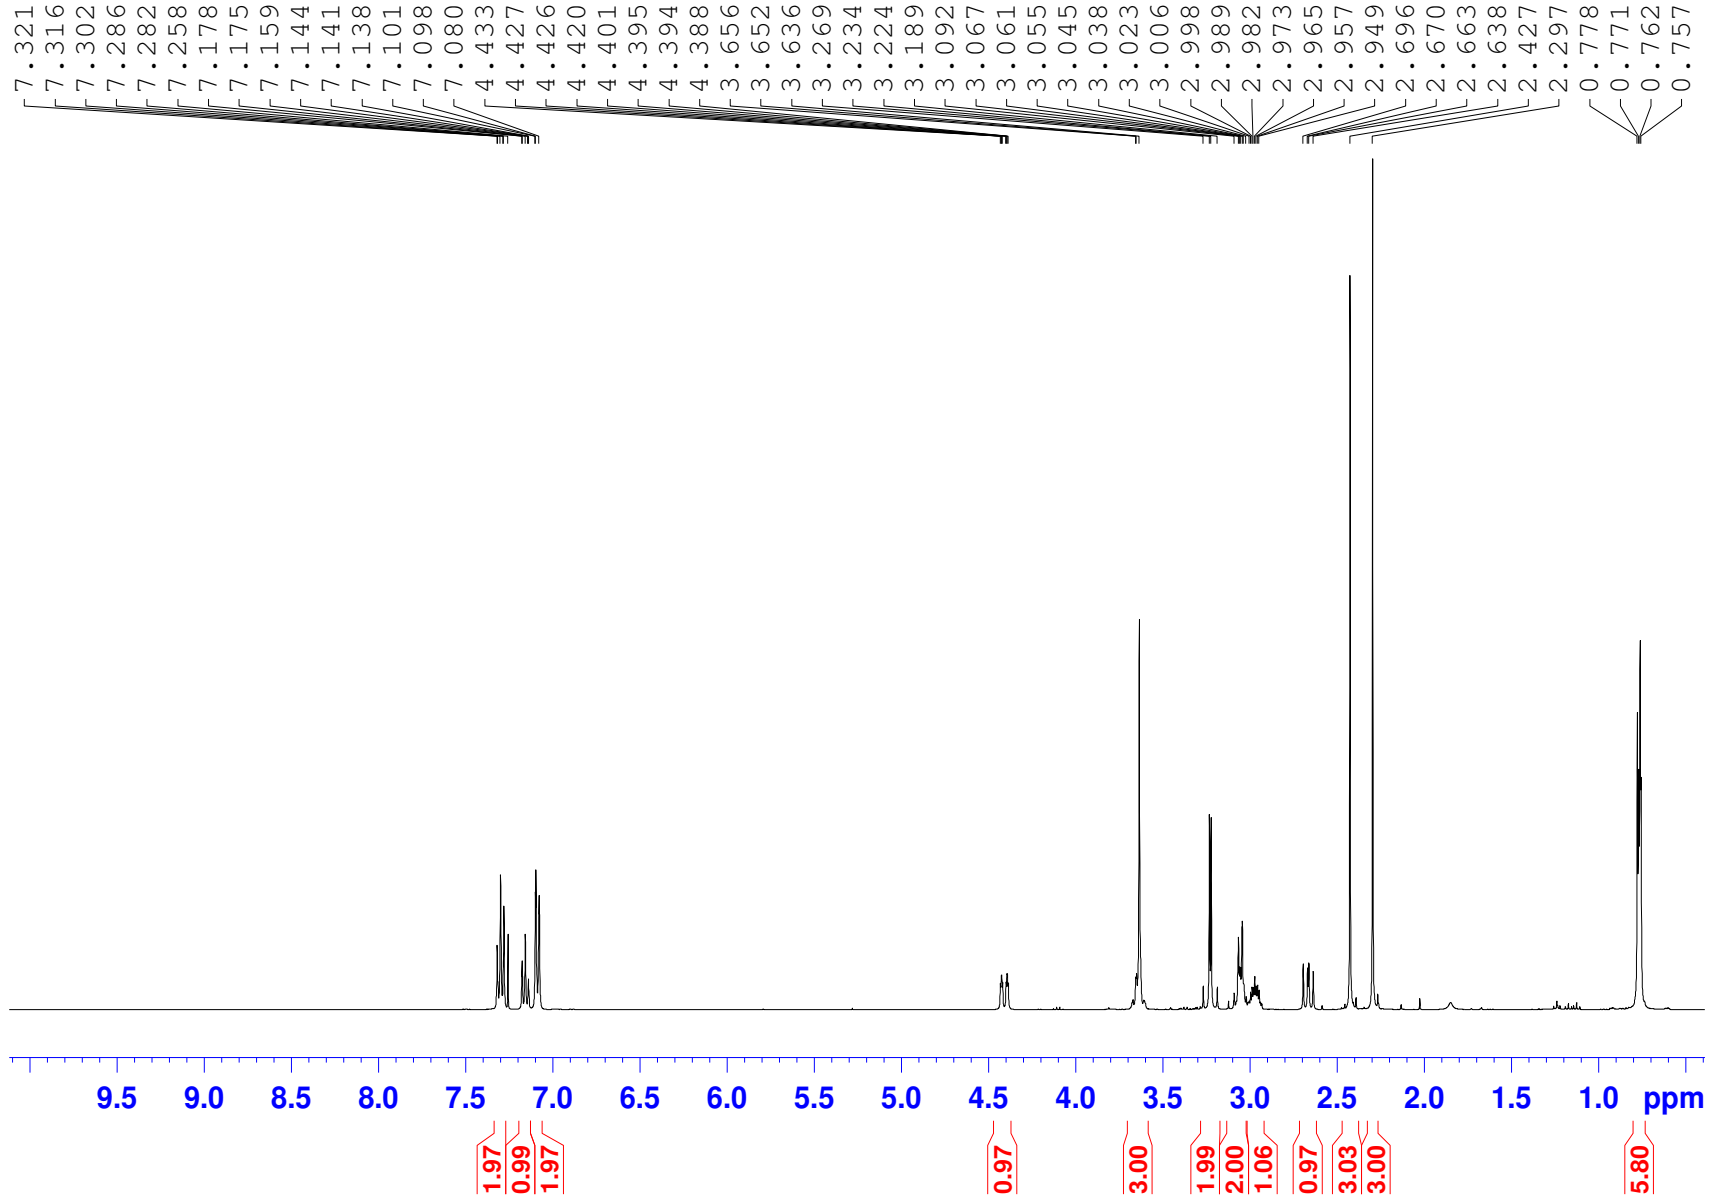

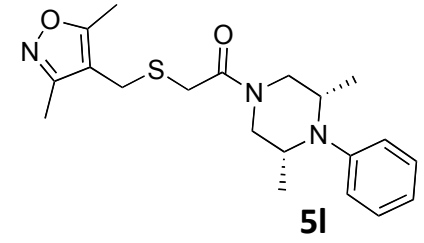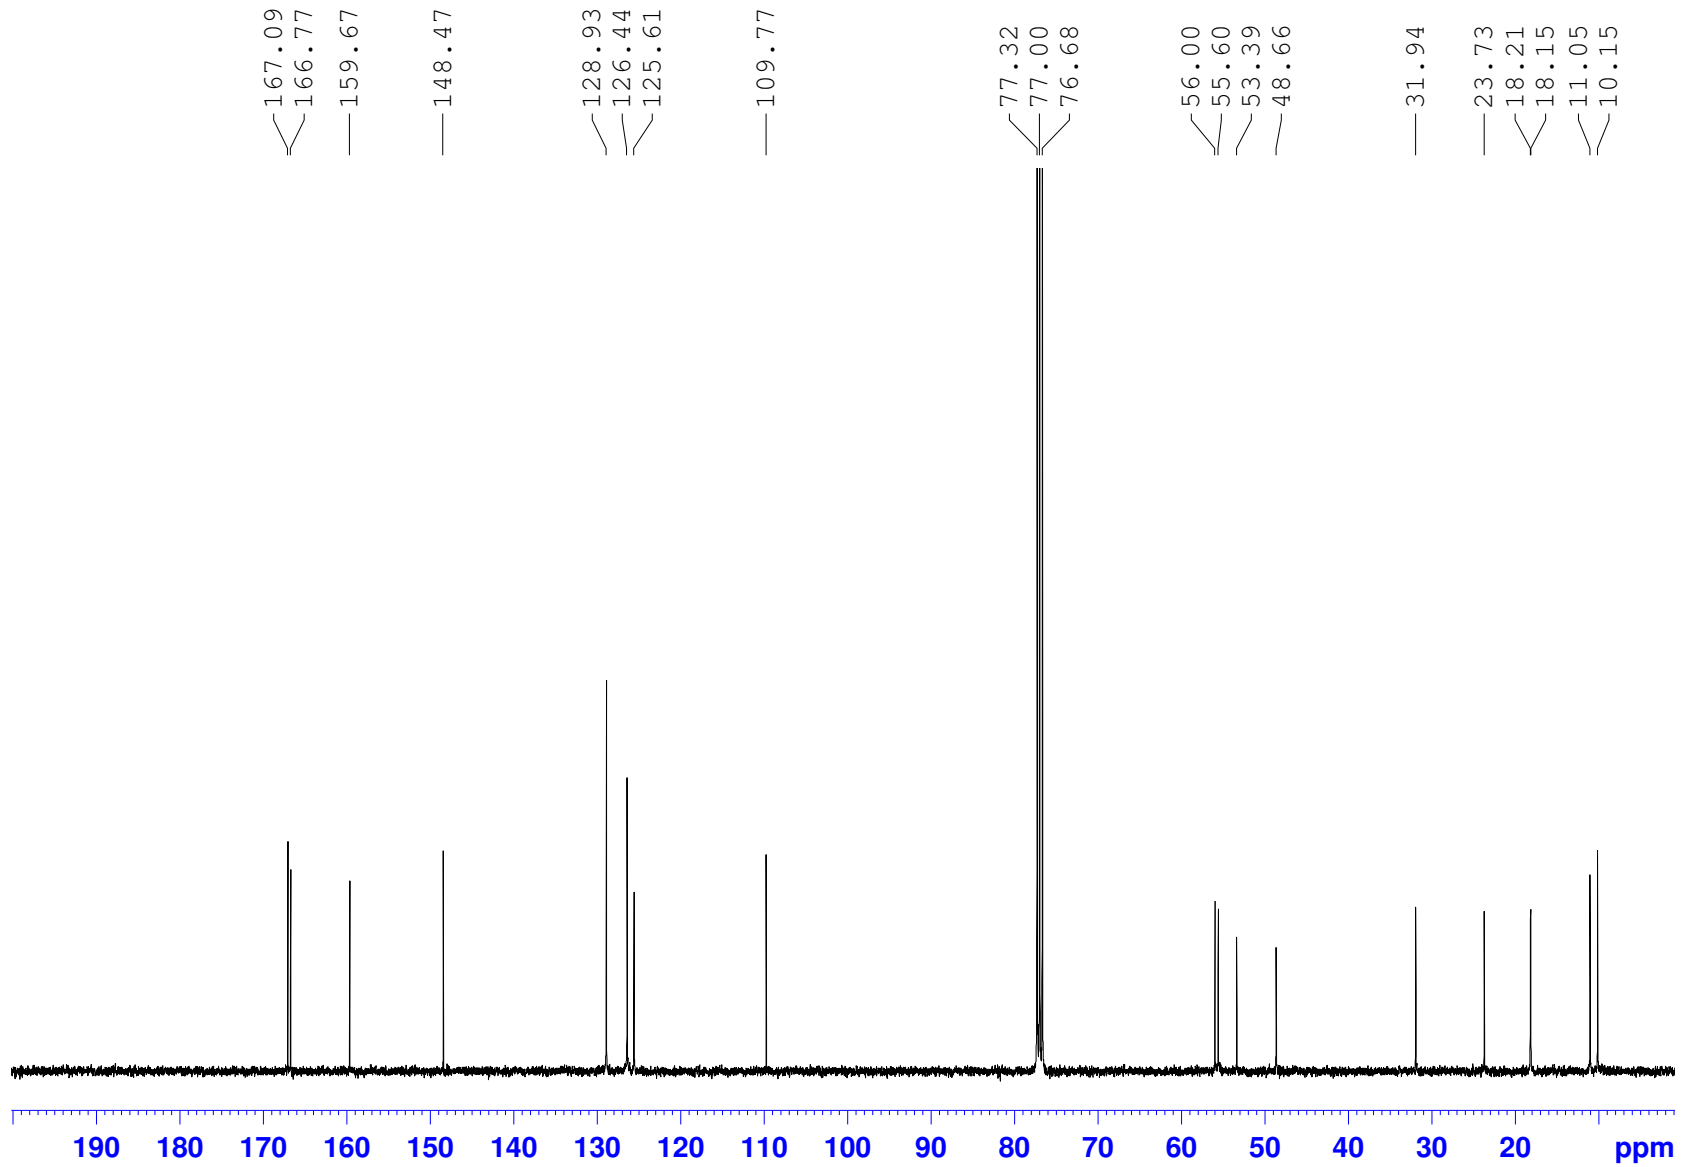

S70

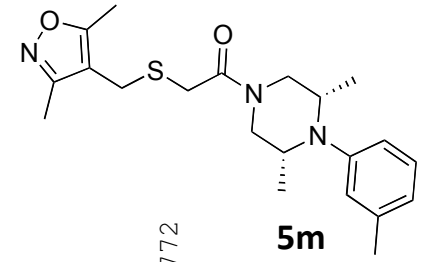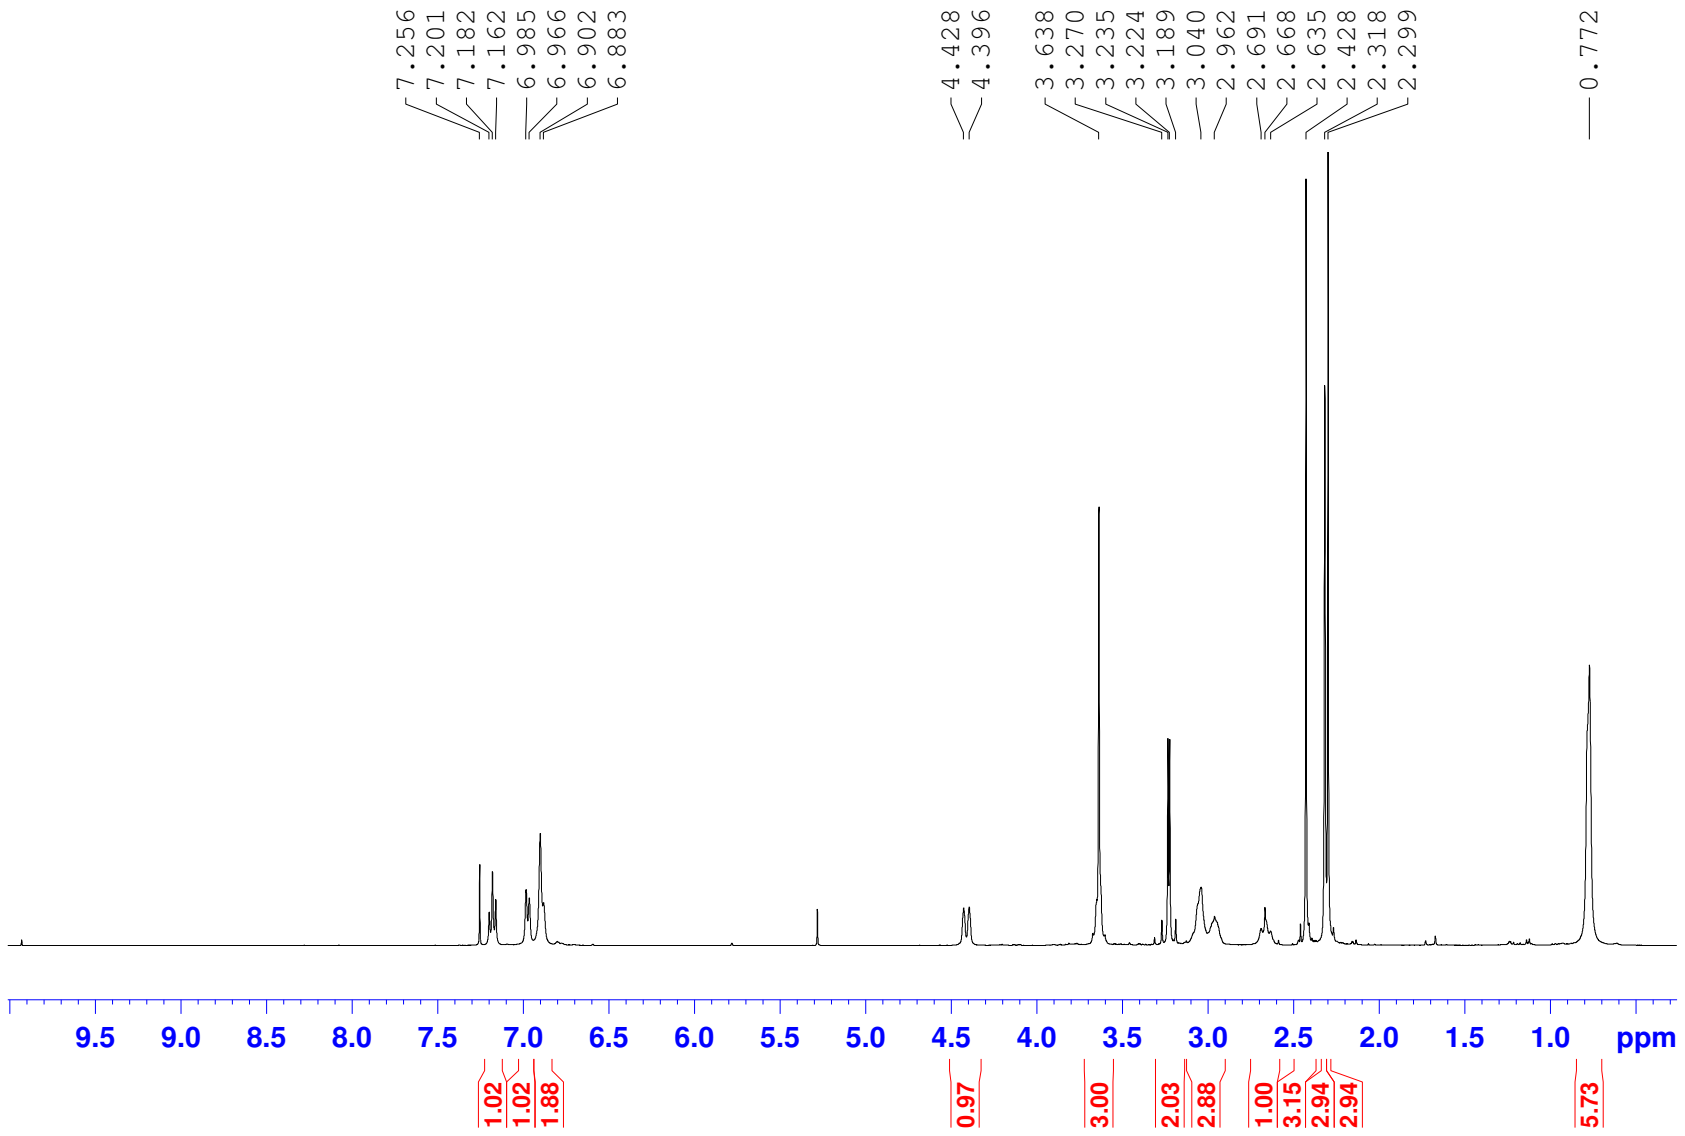

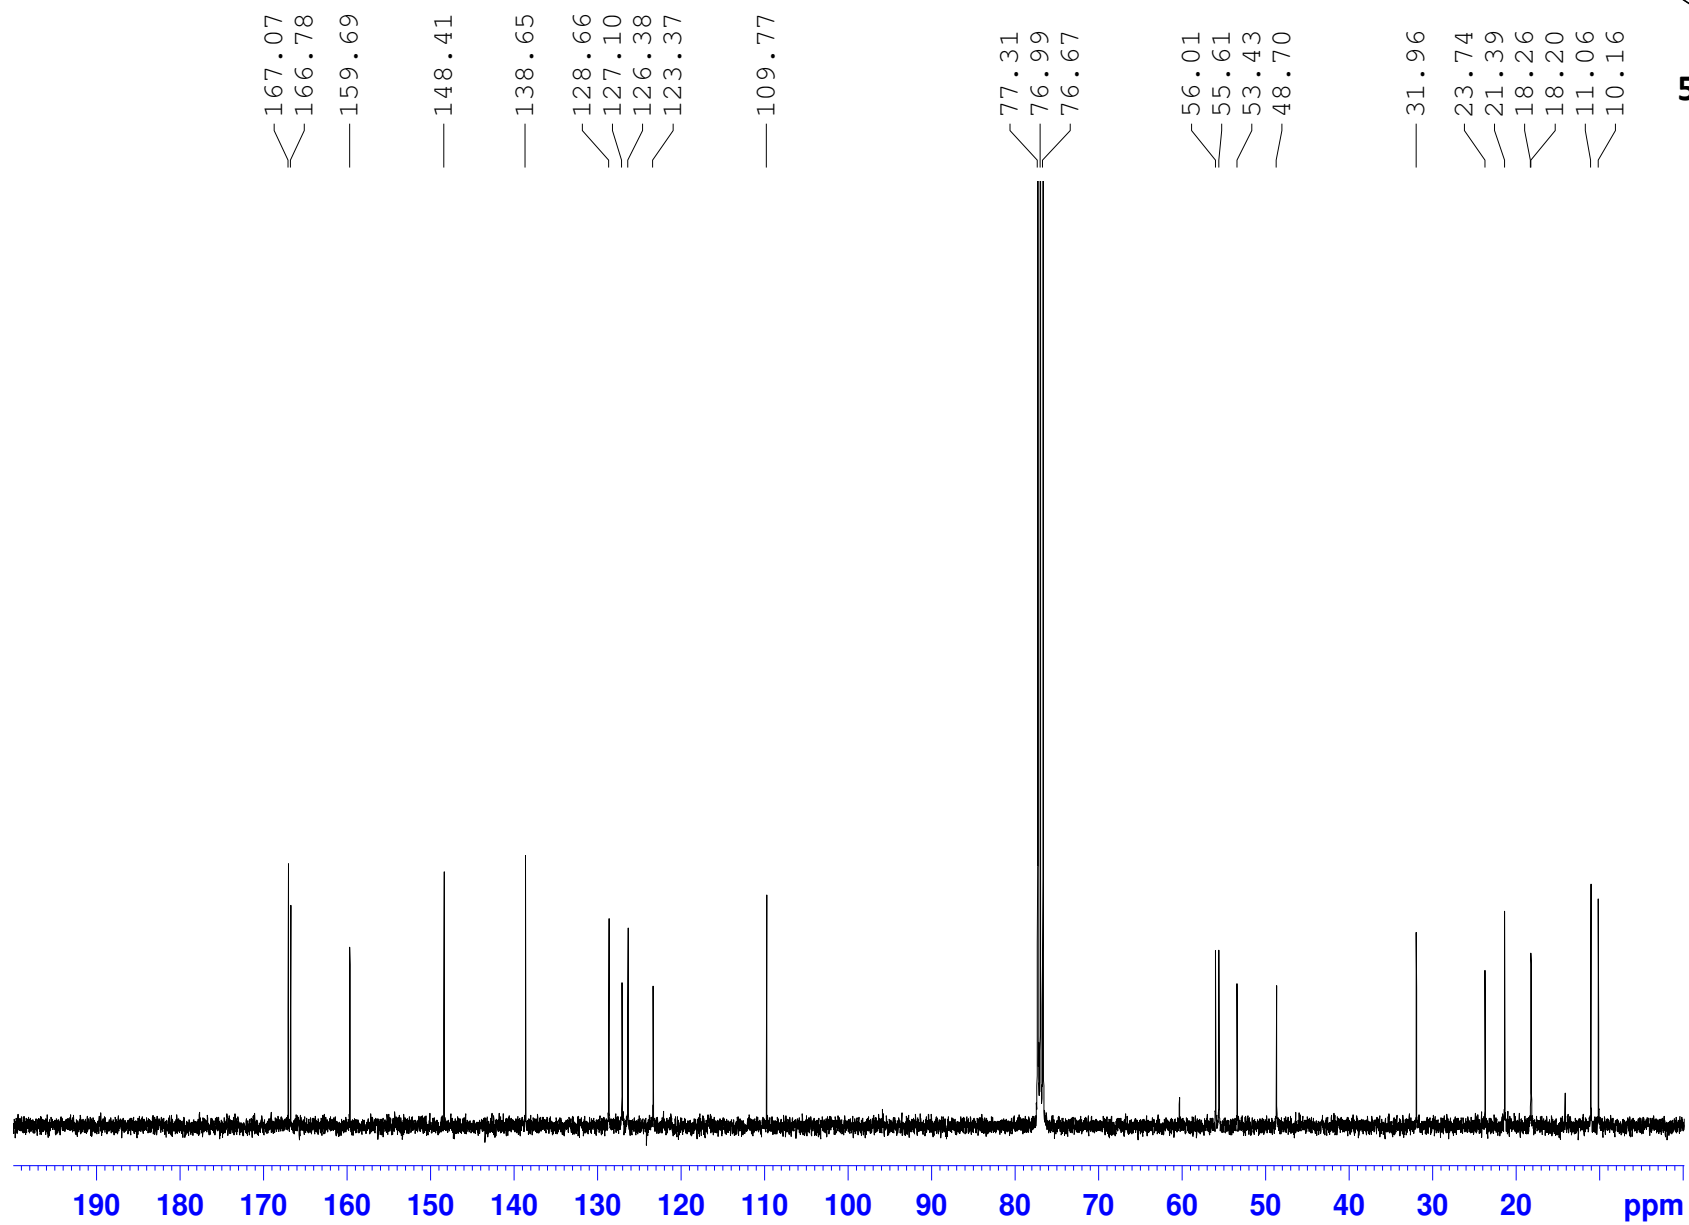

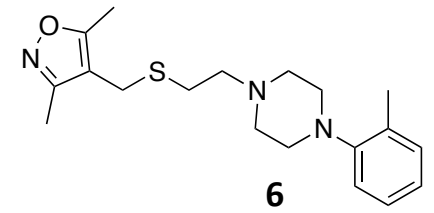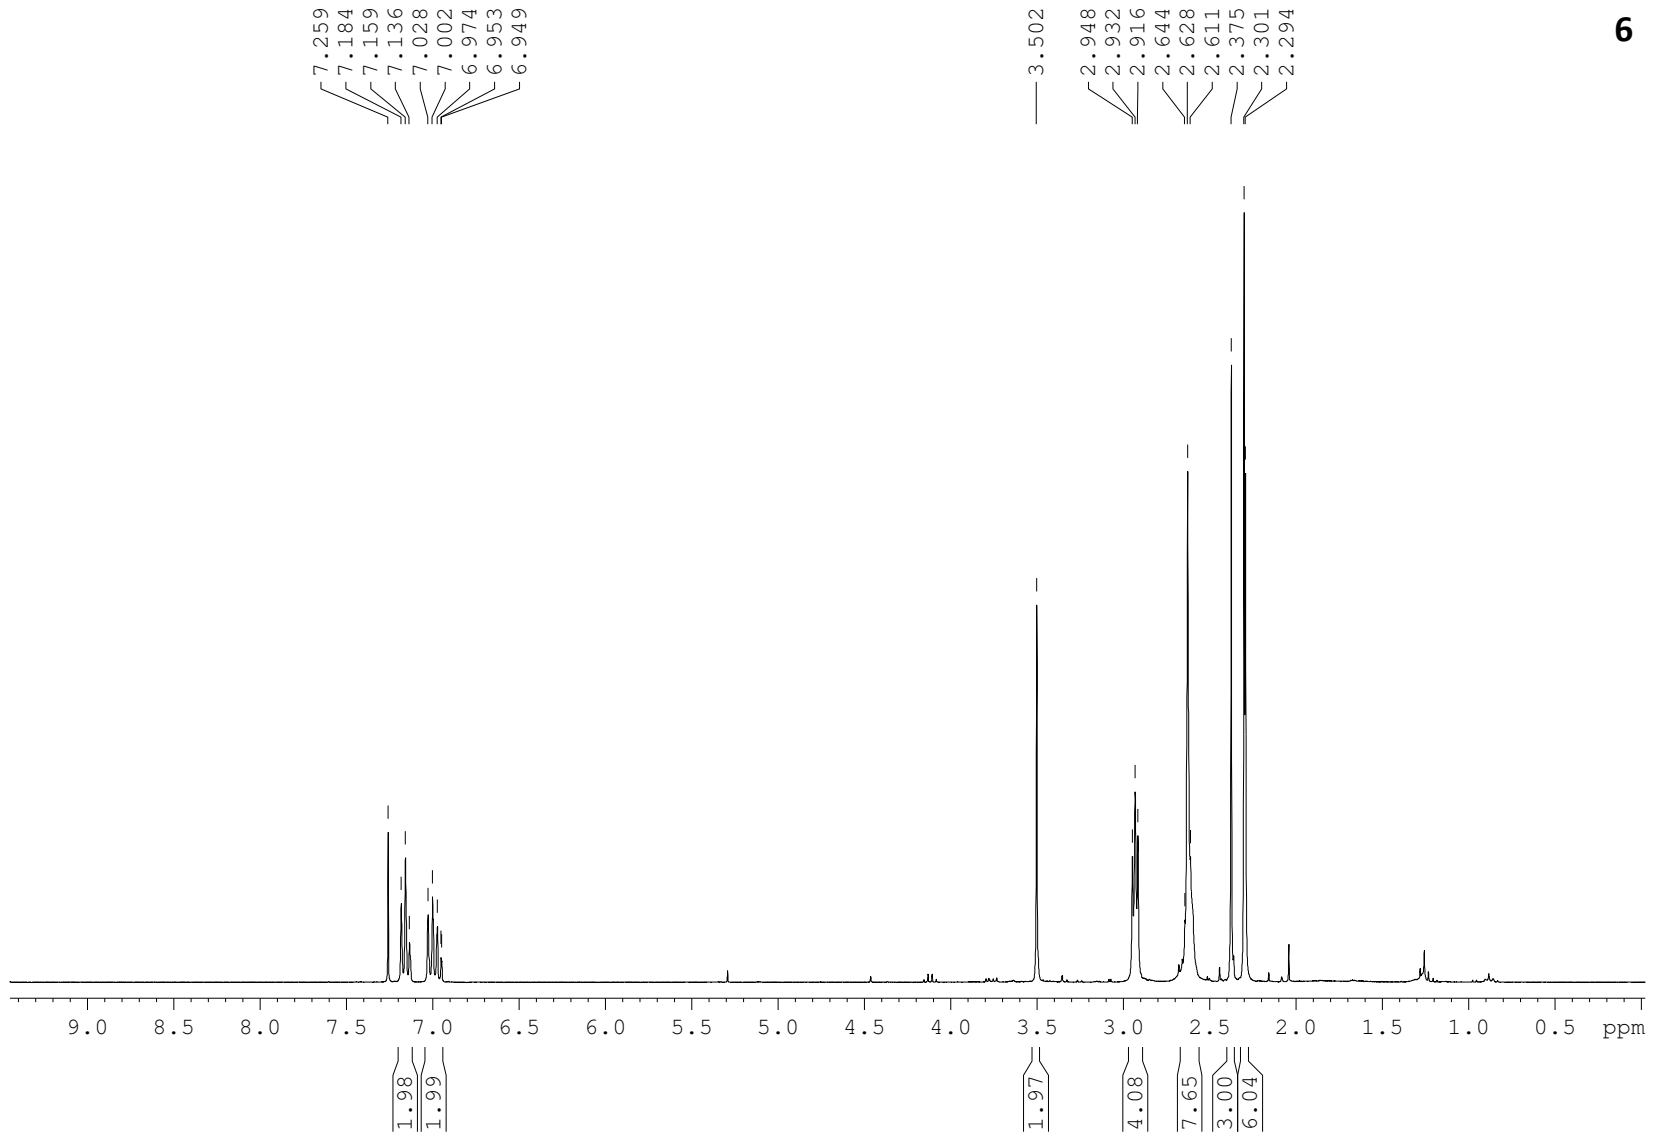



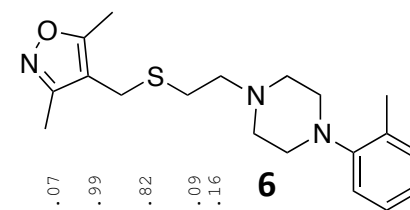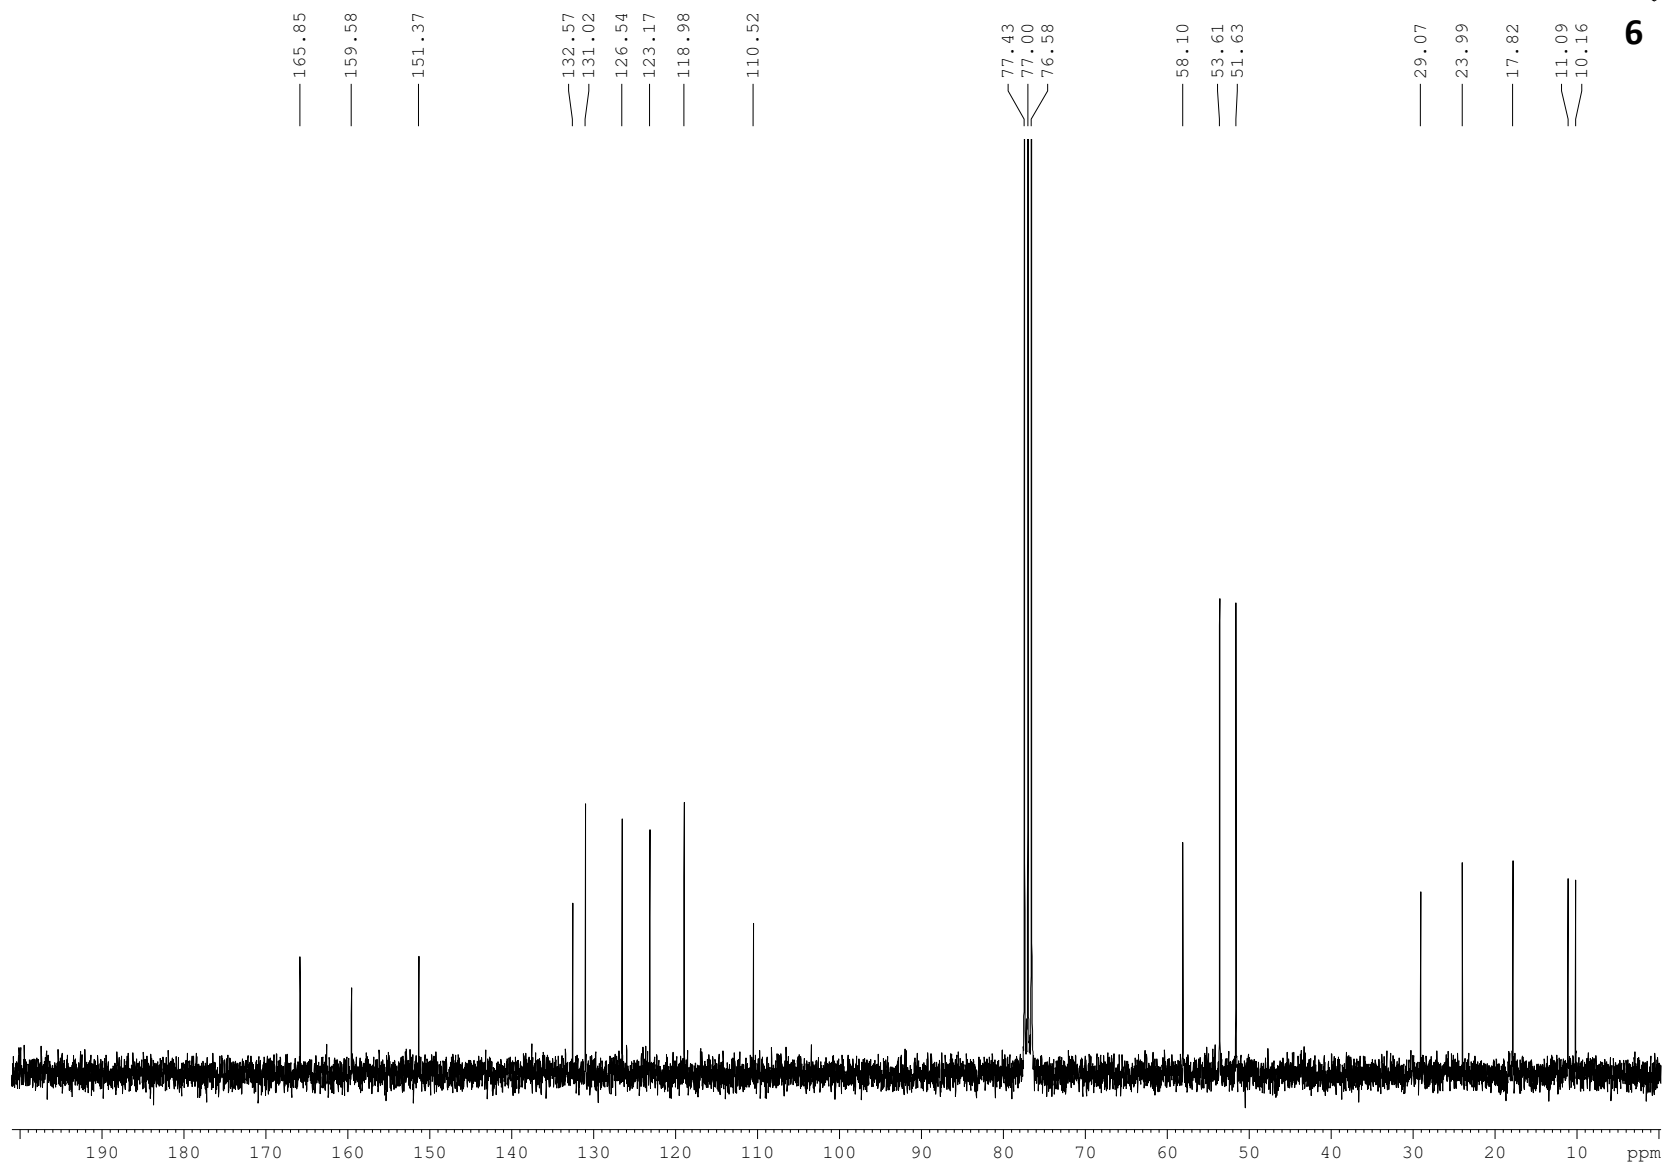

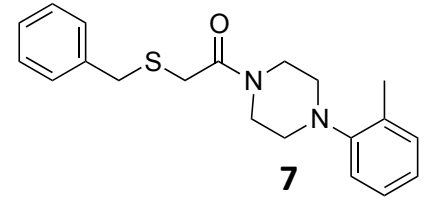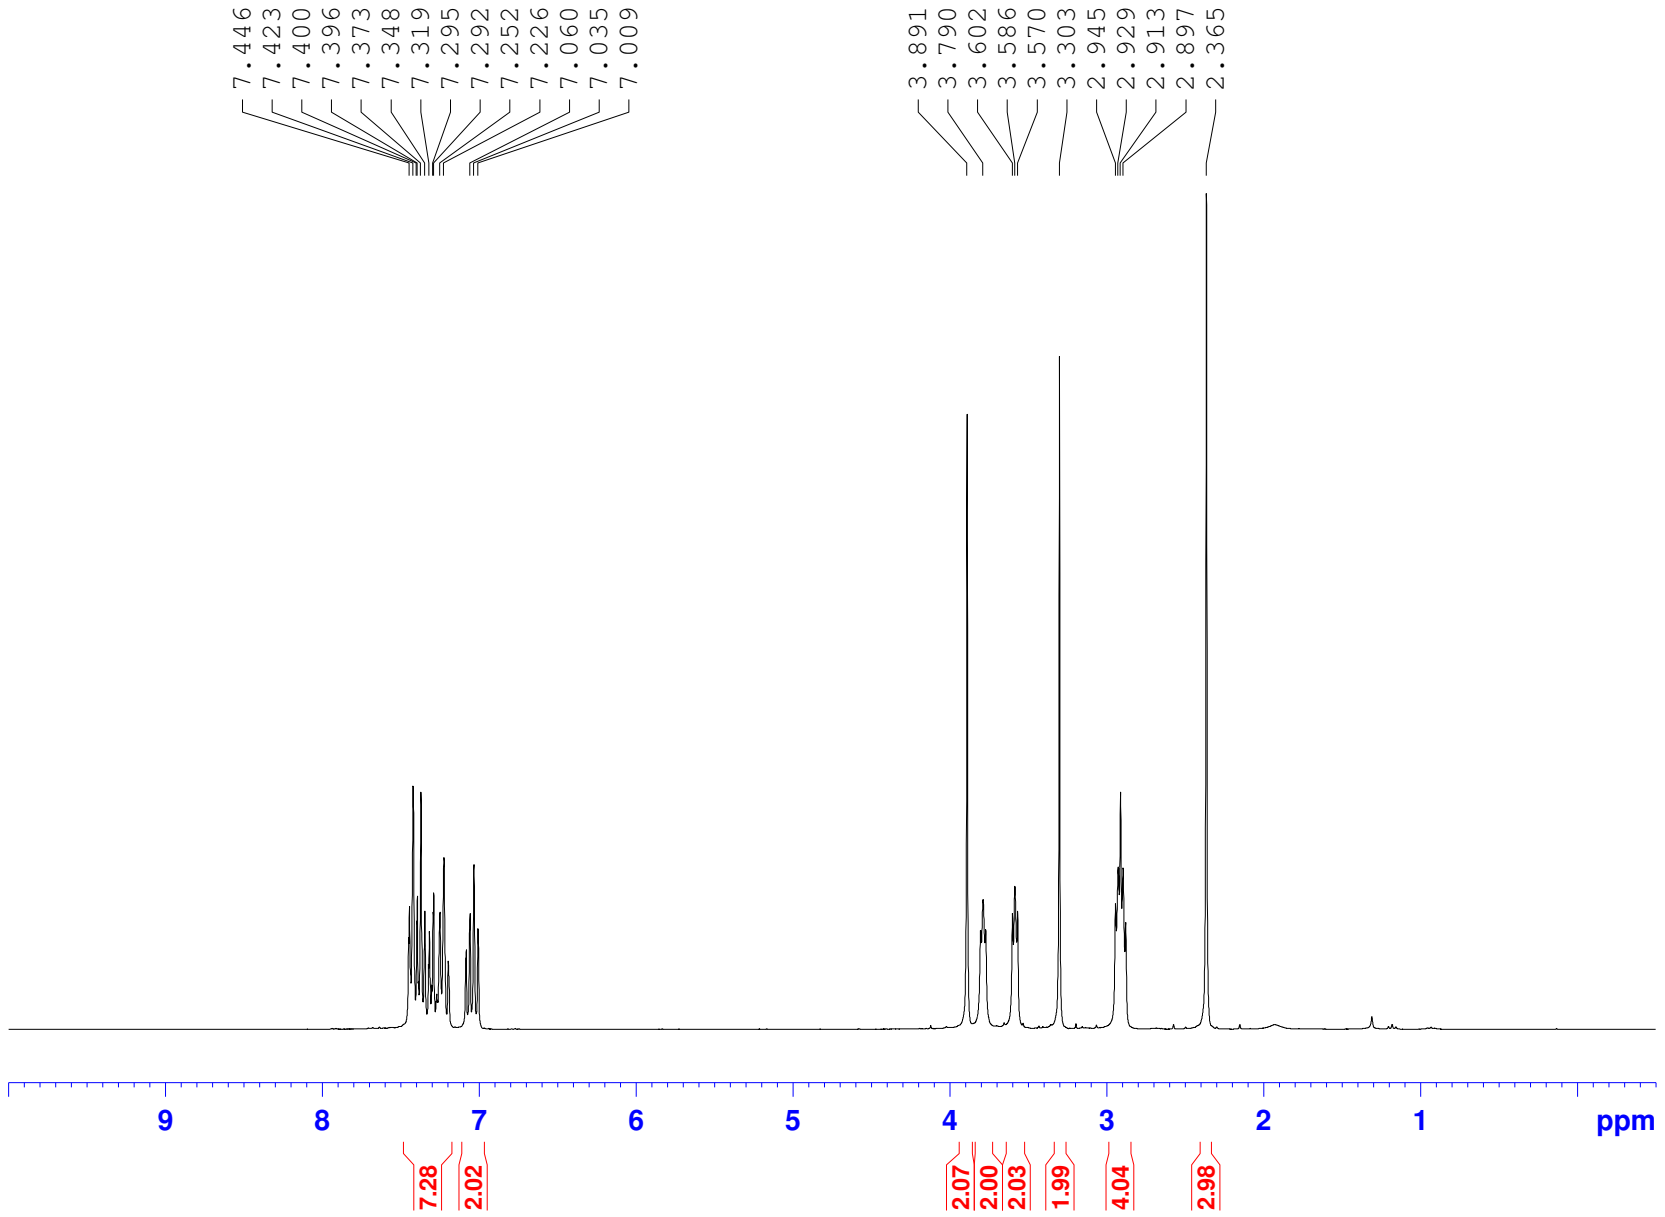

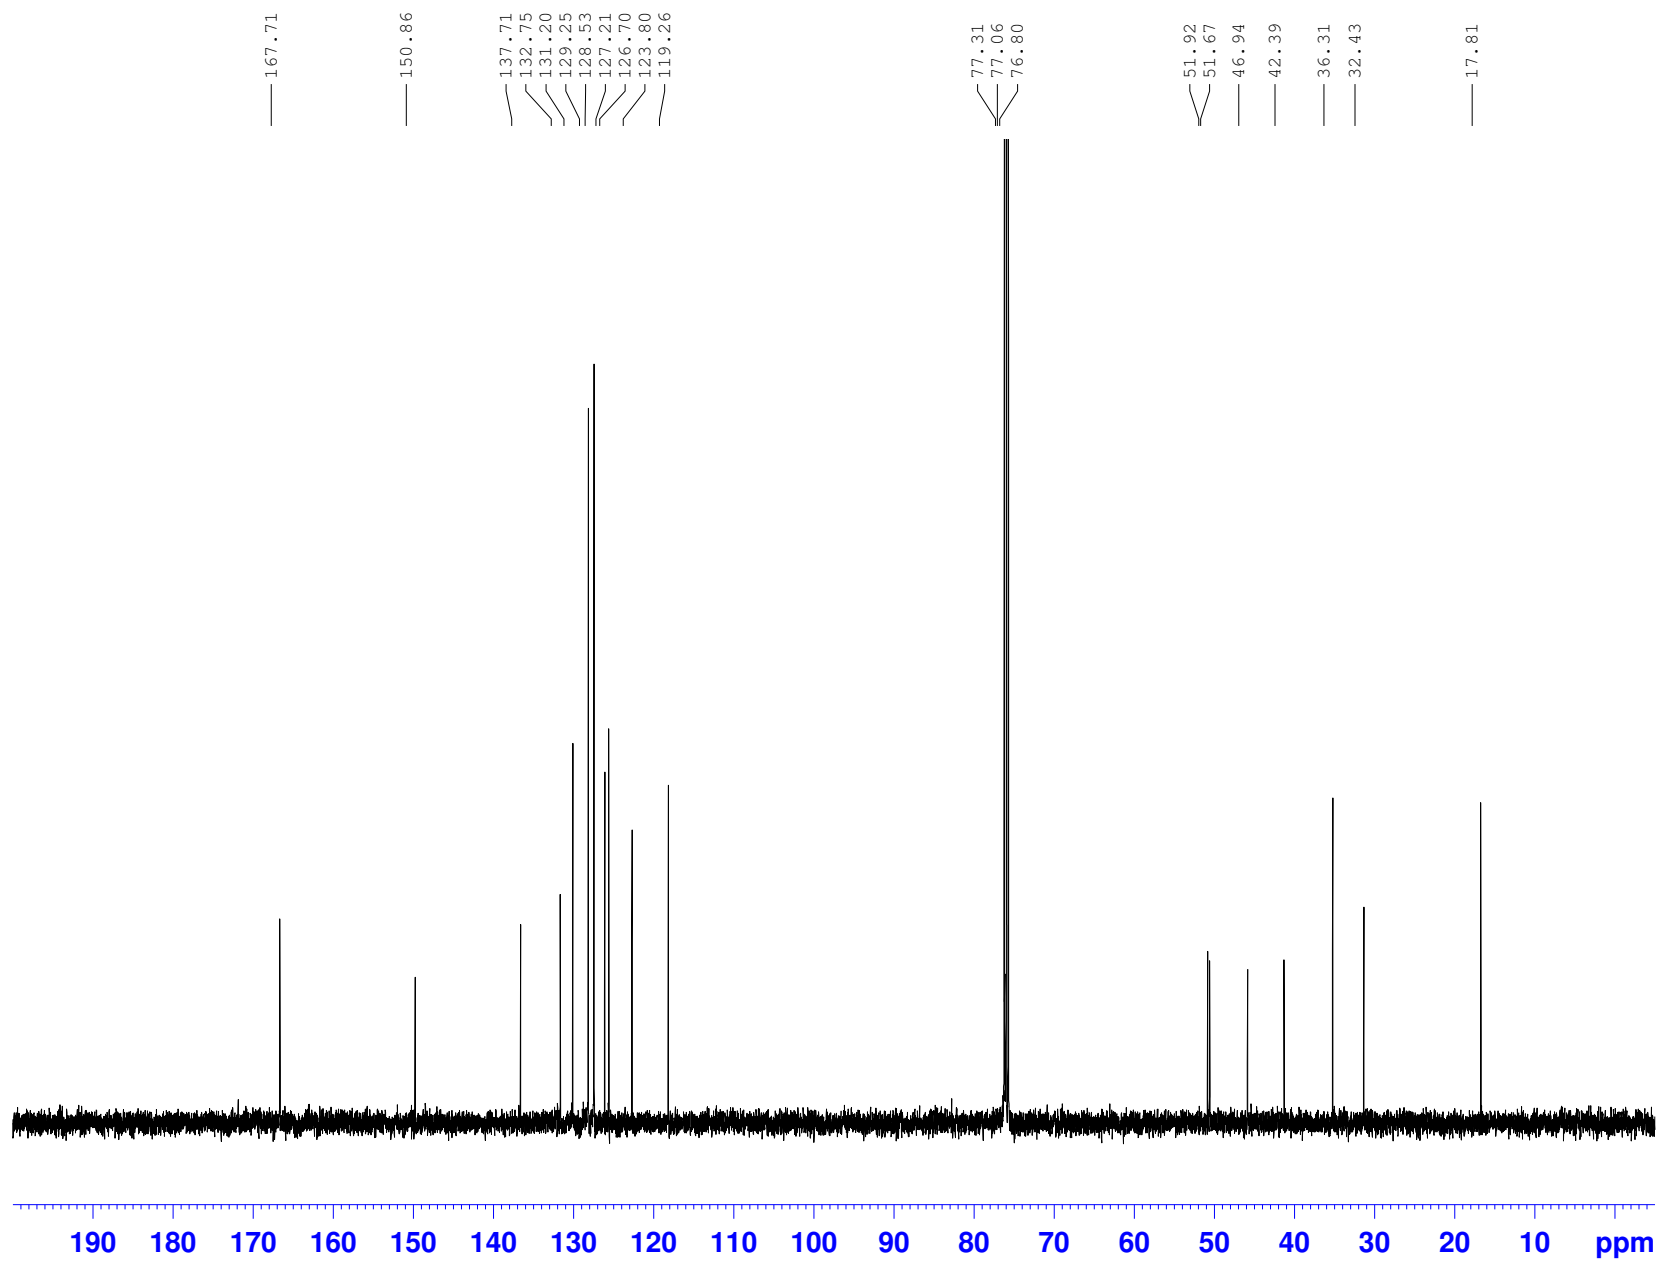

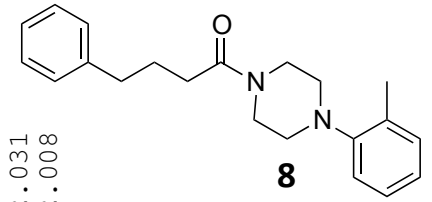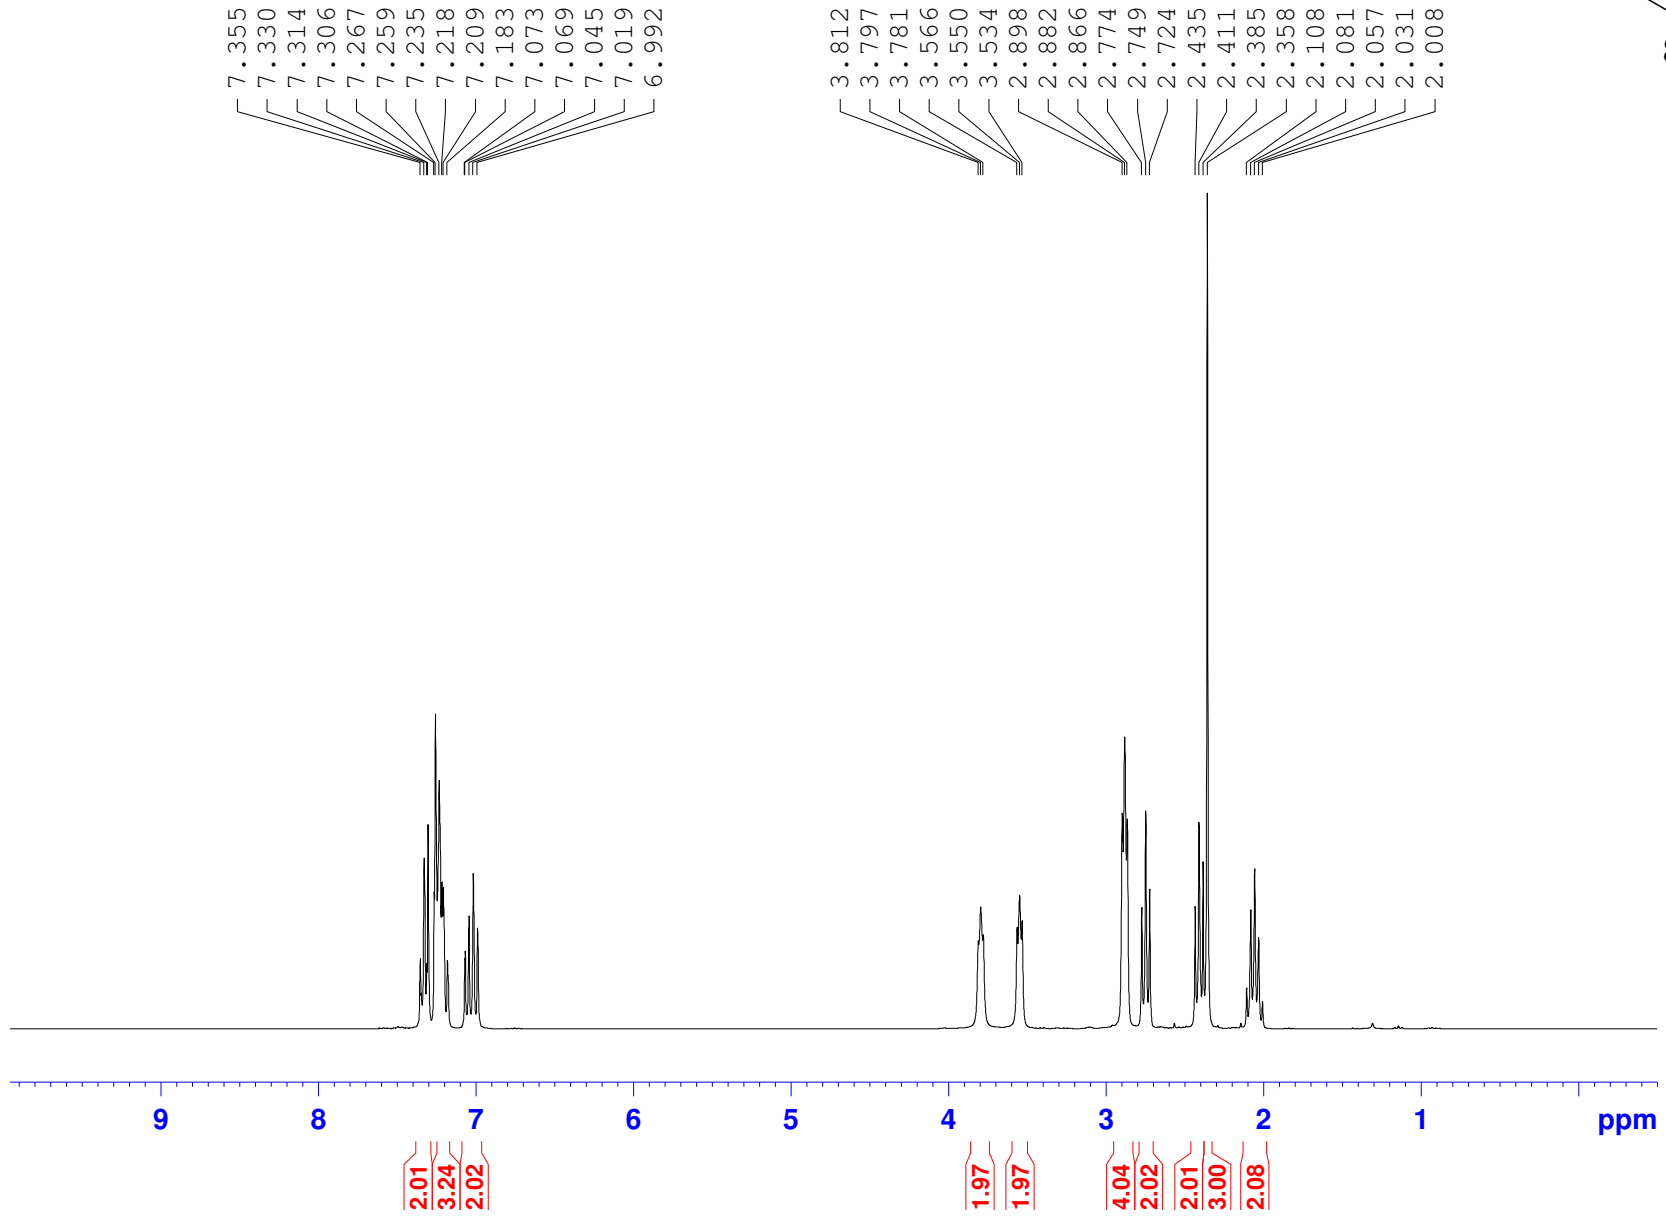

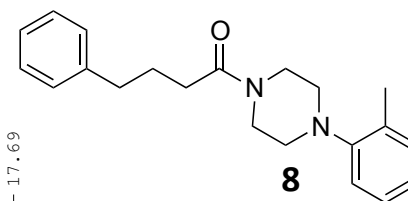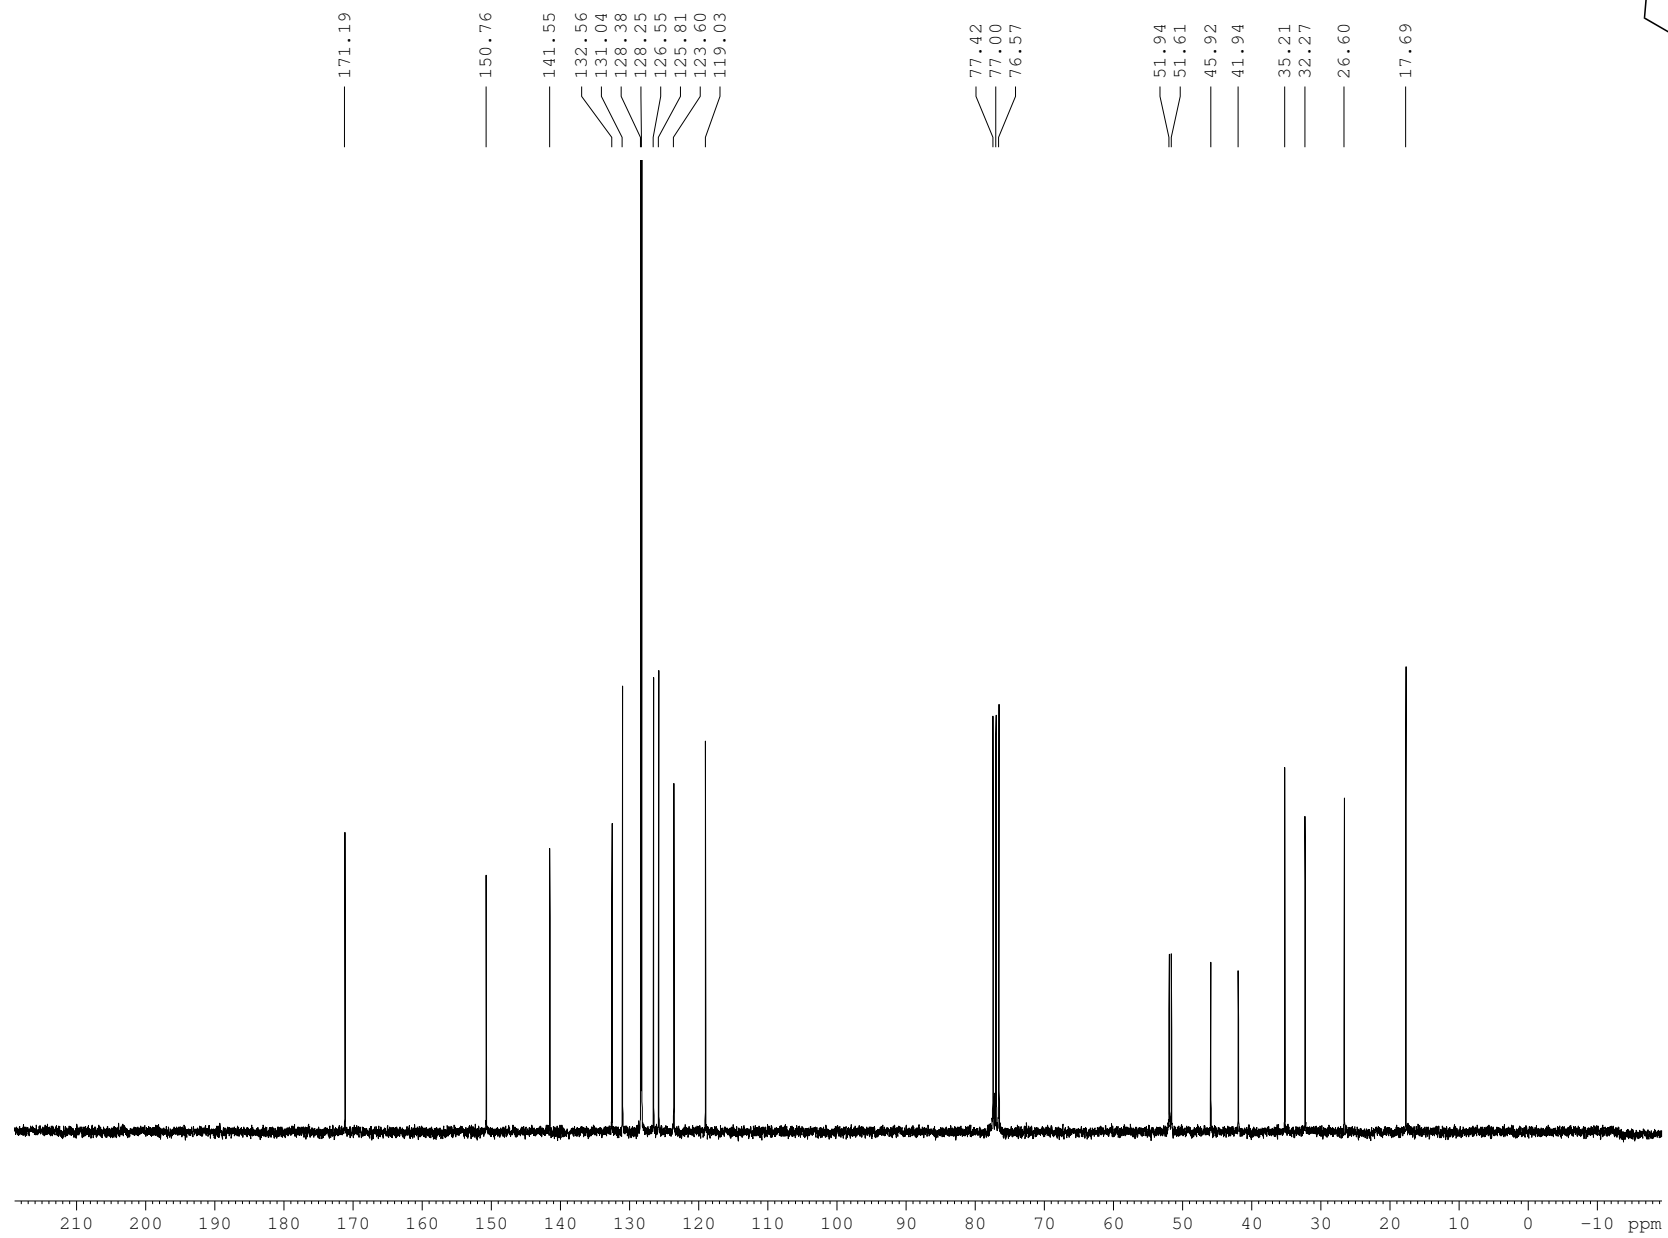

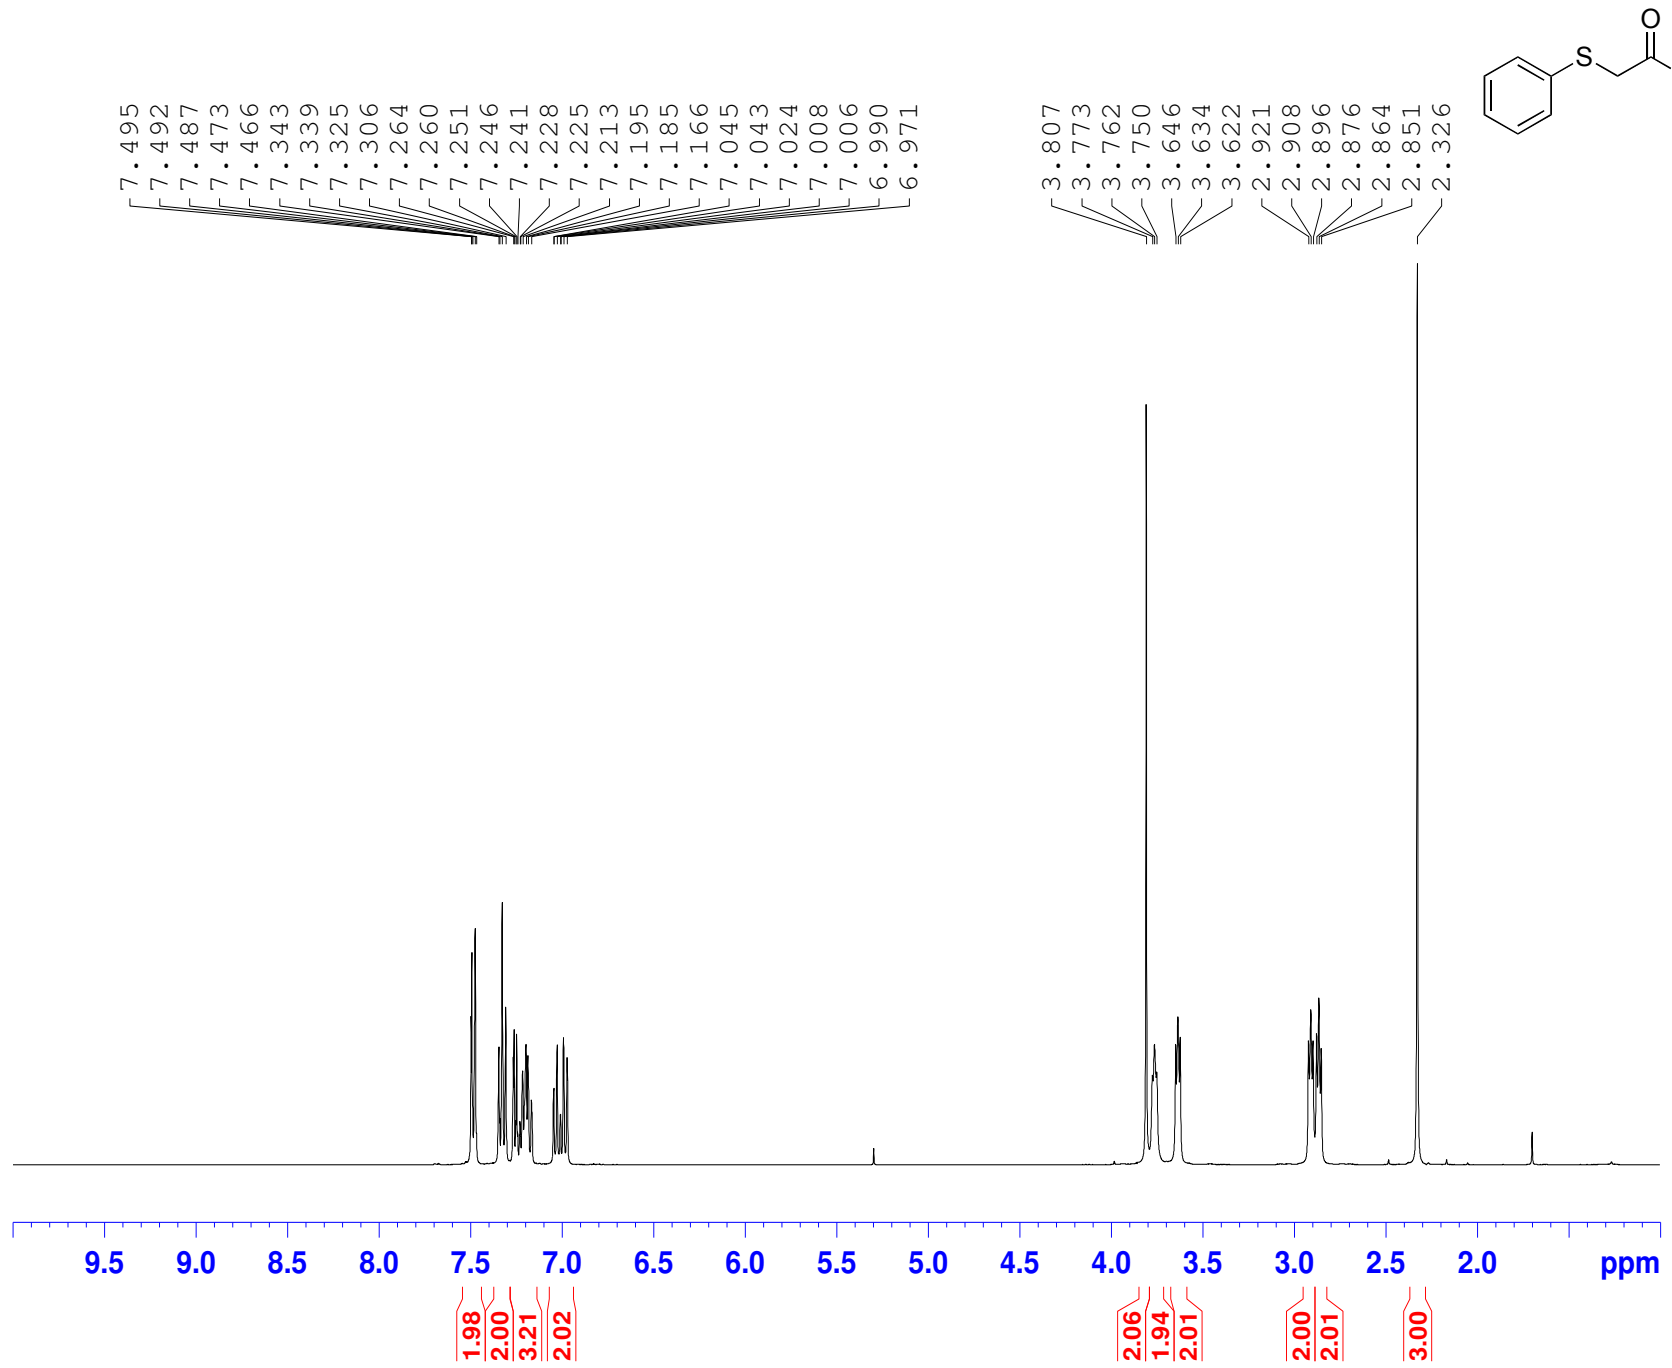

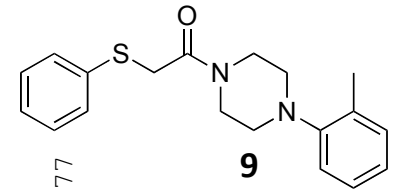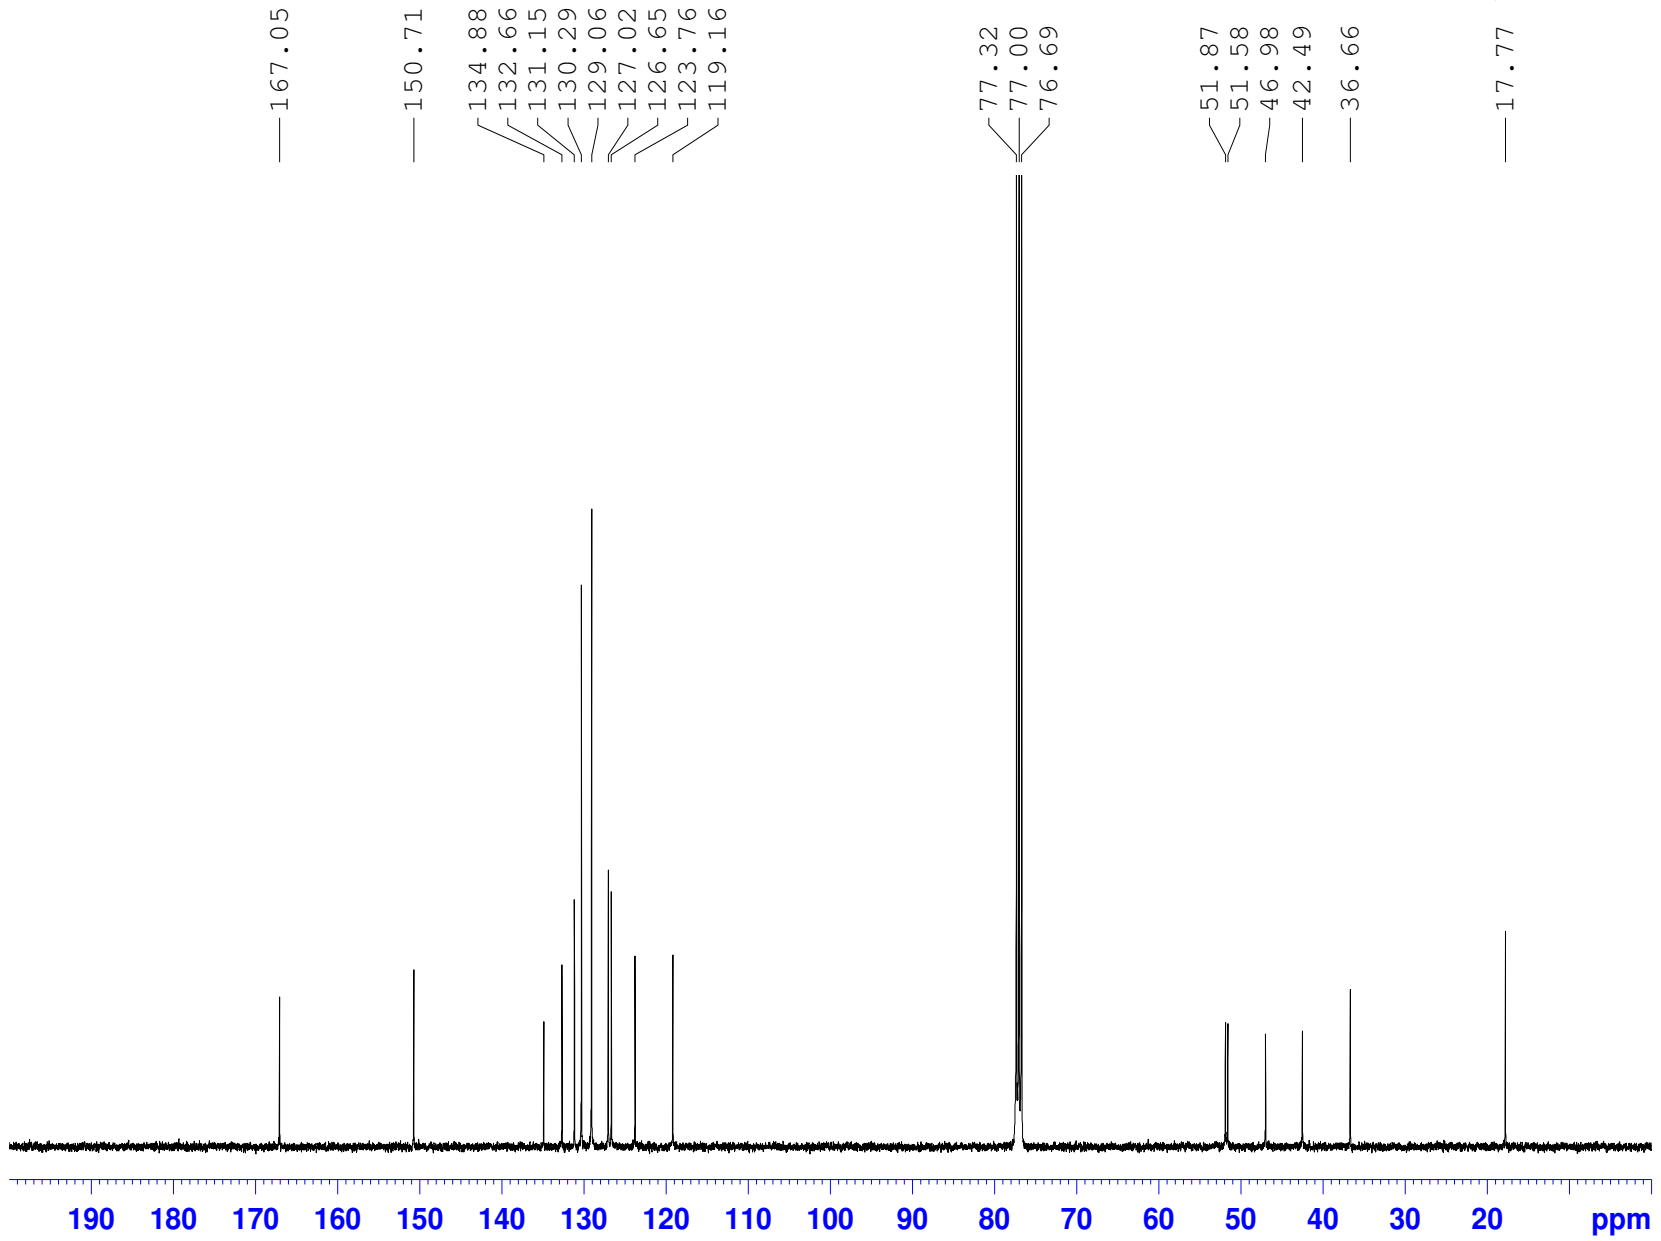

S80

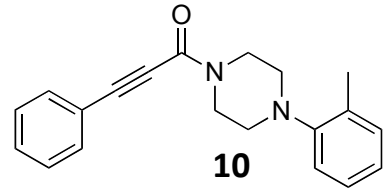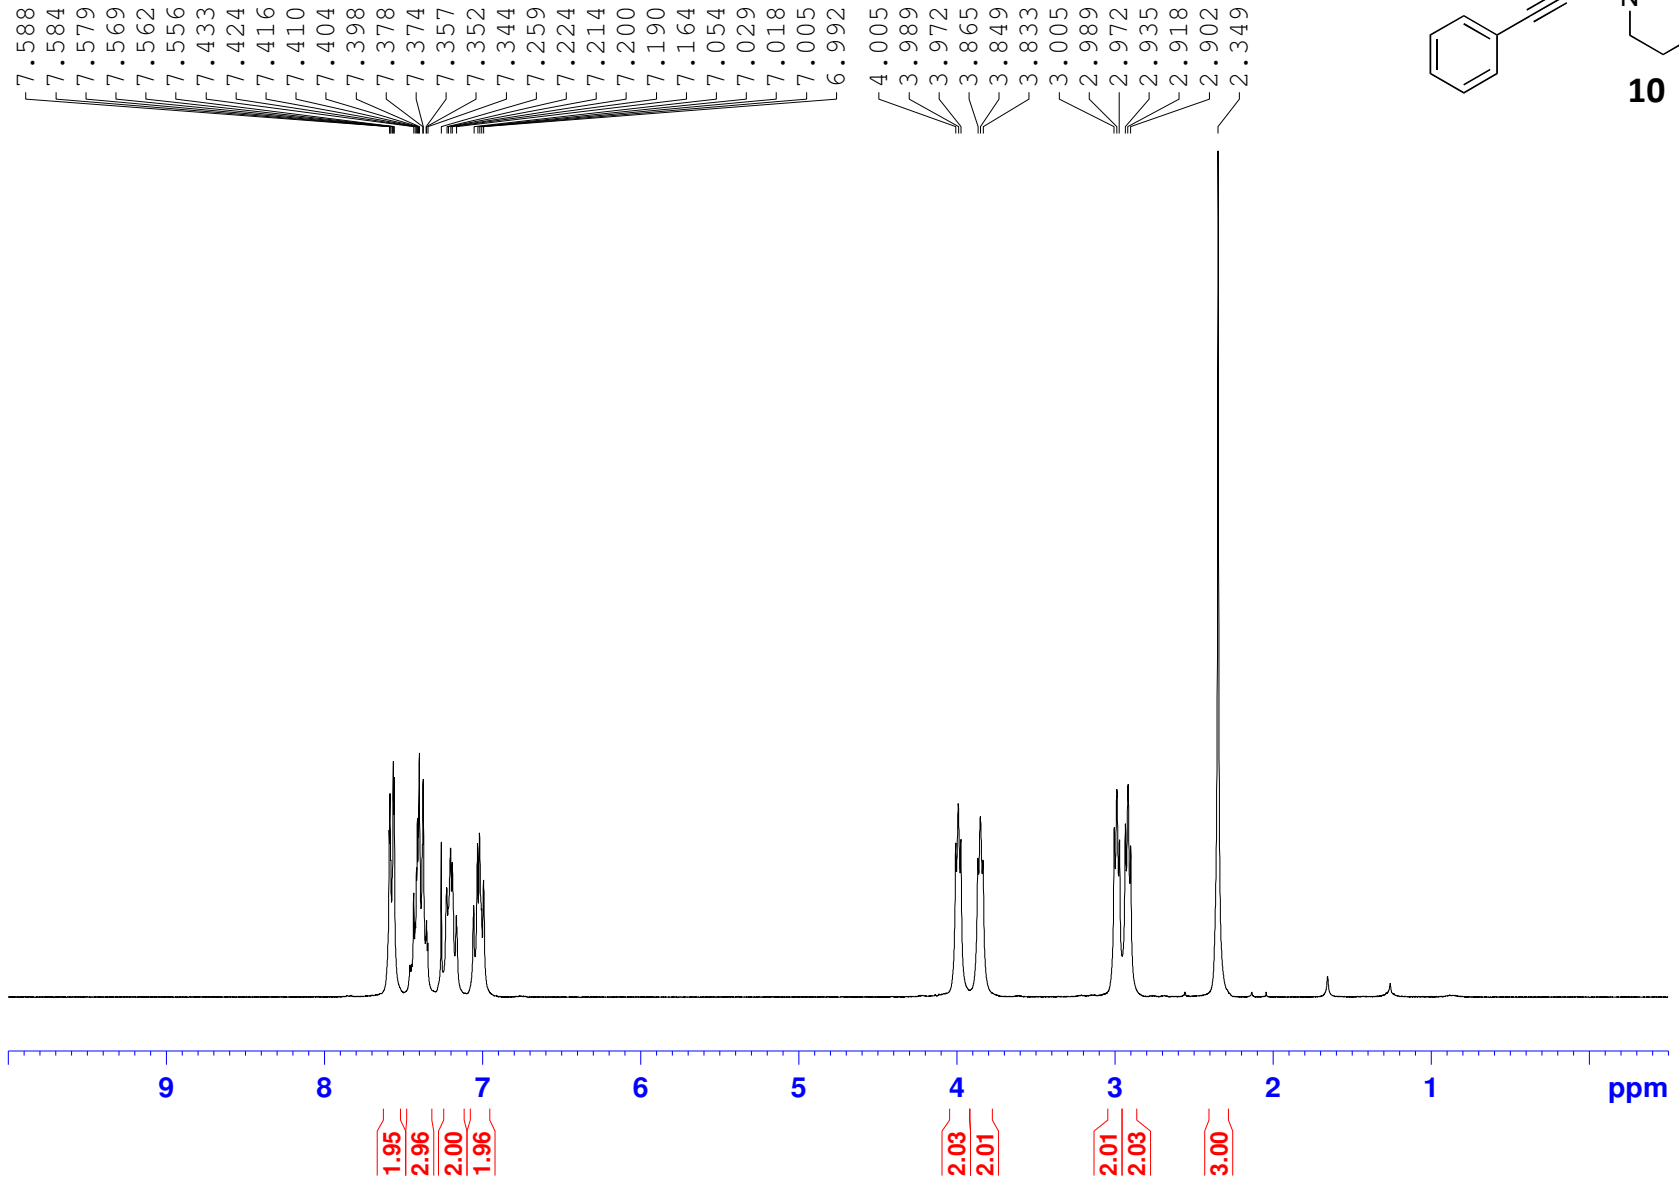



S81

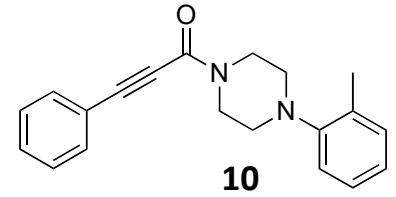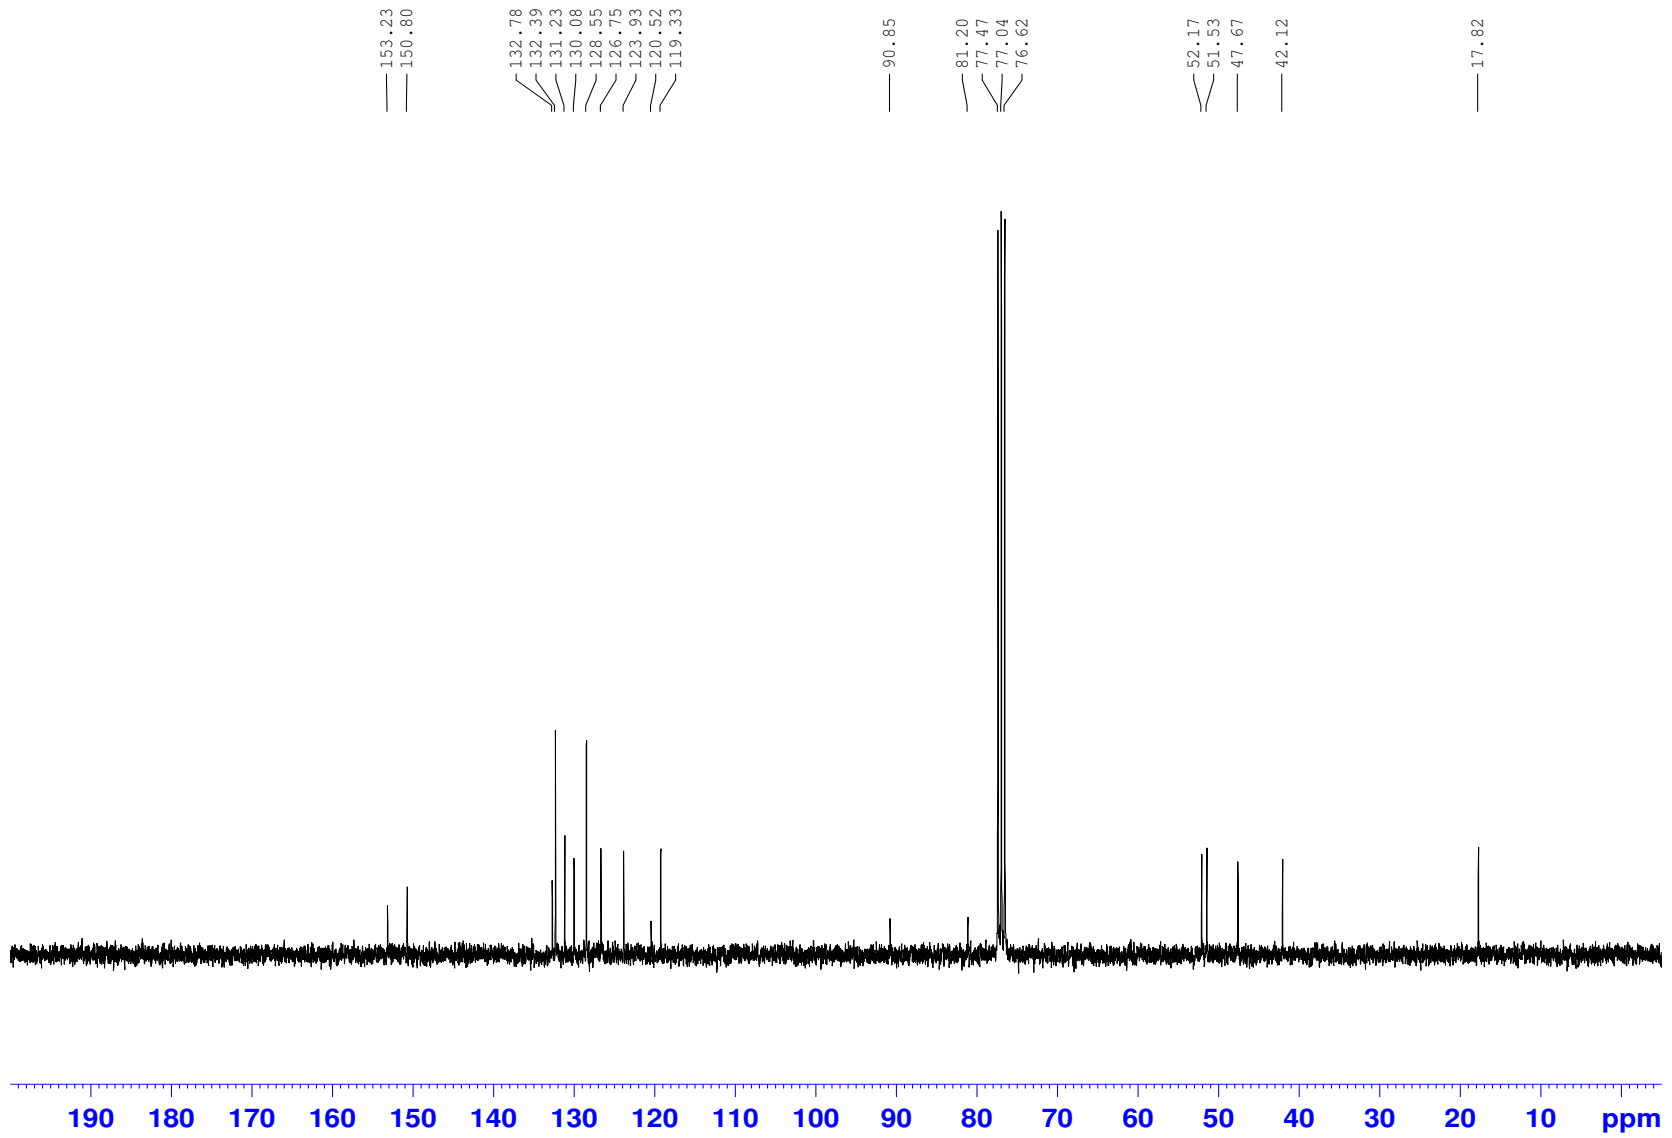

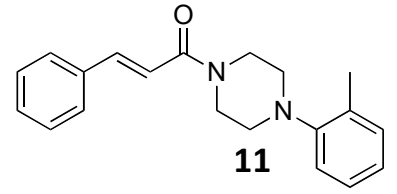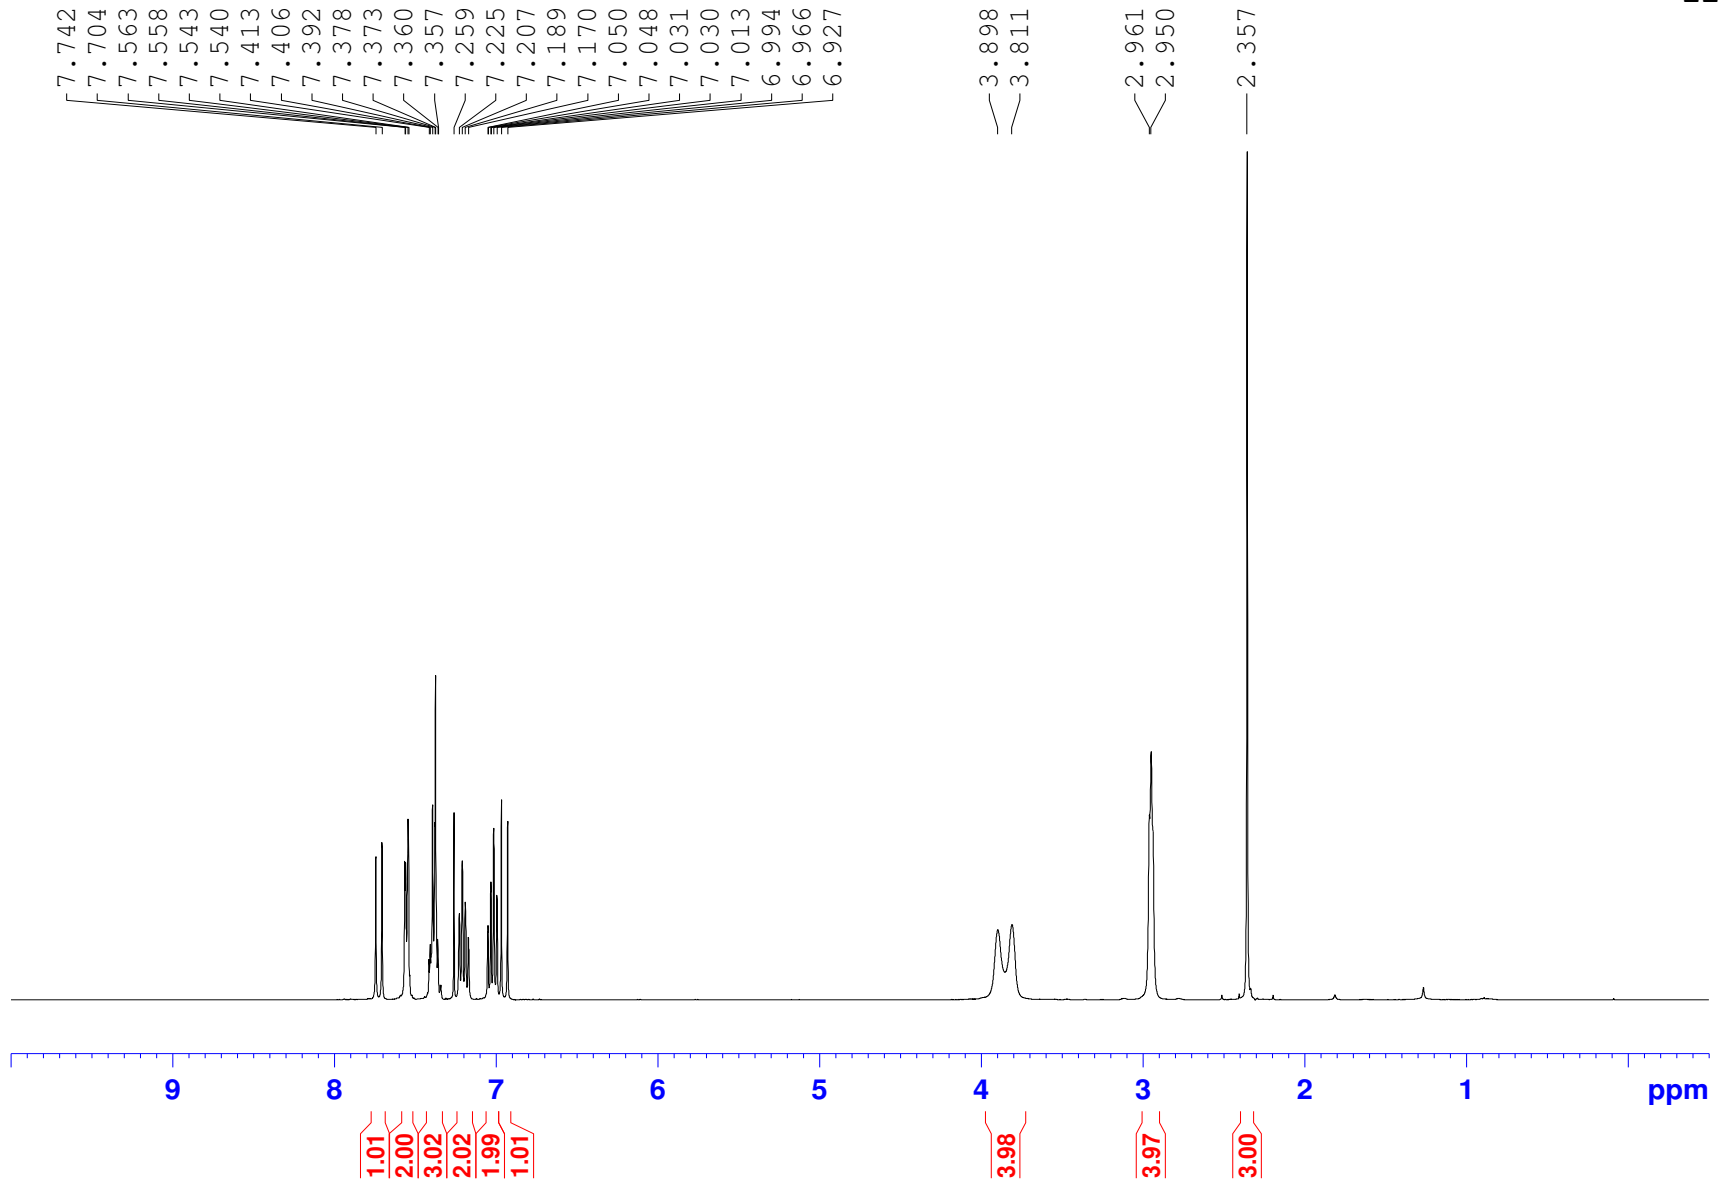

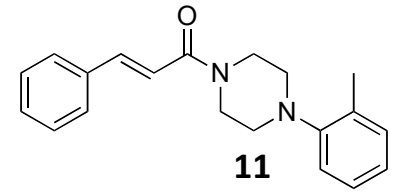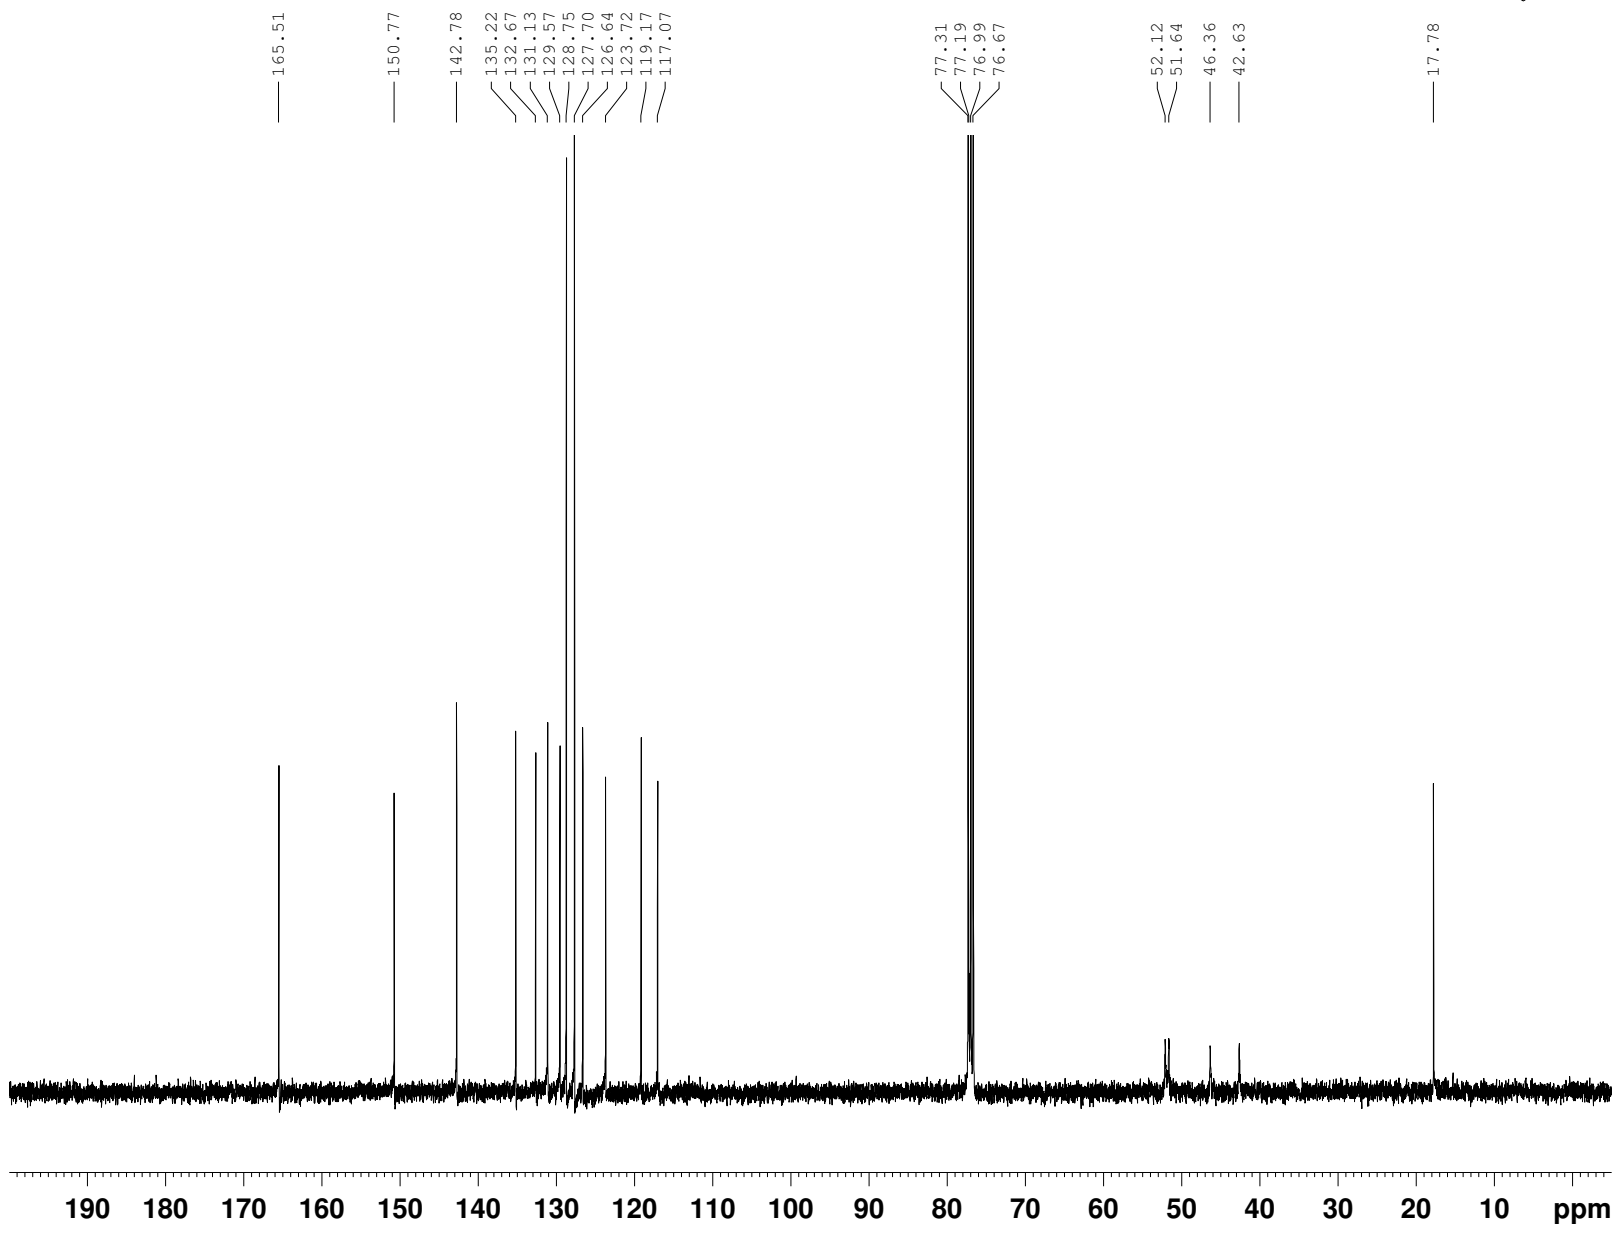

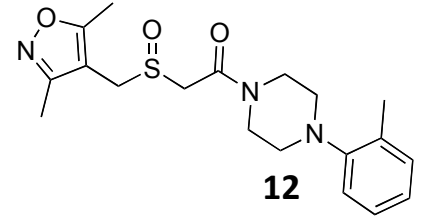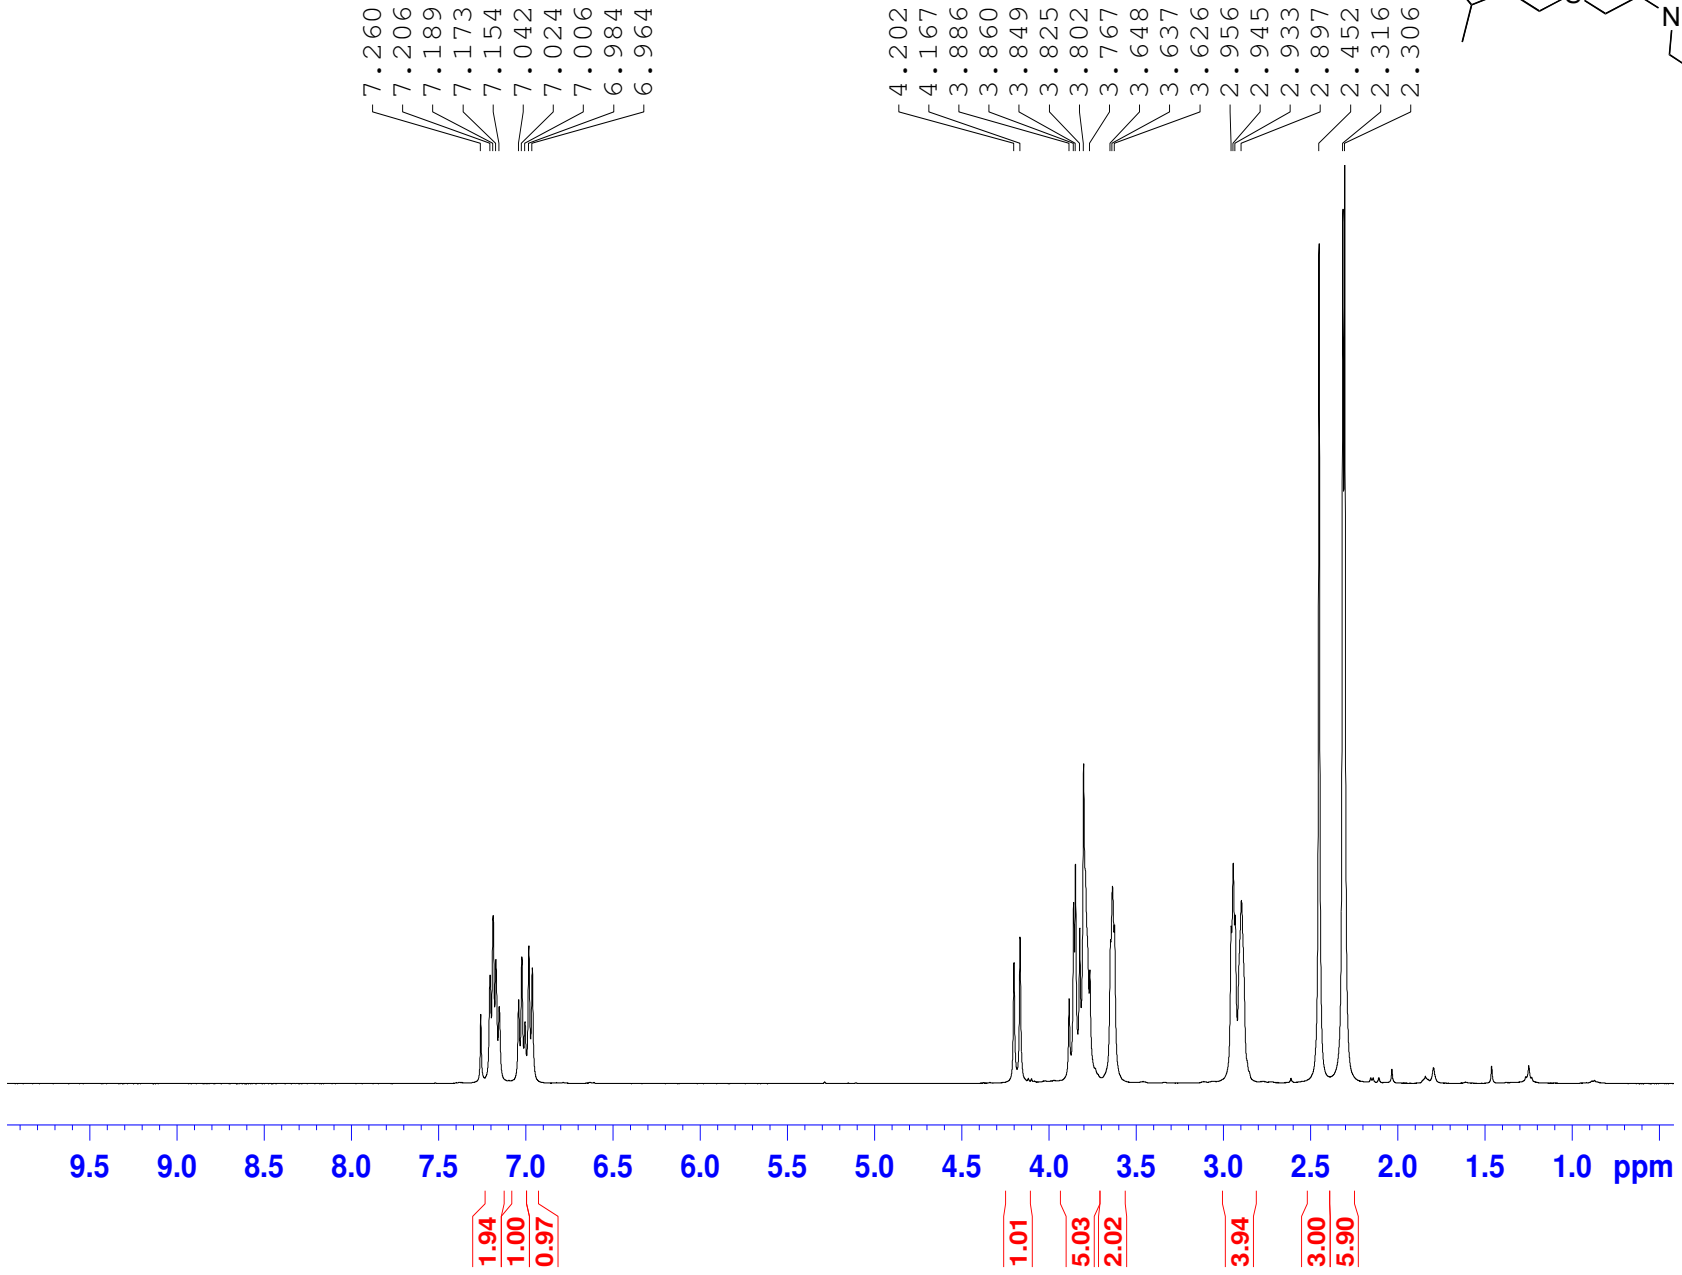

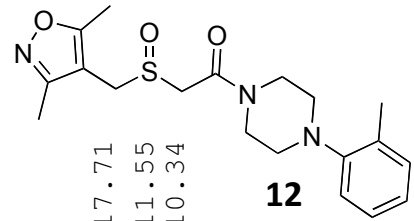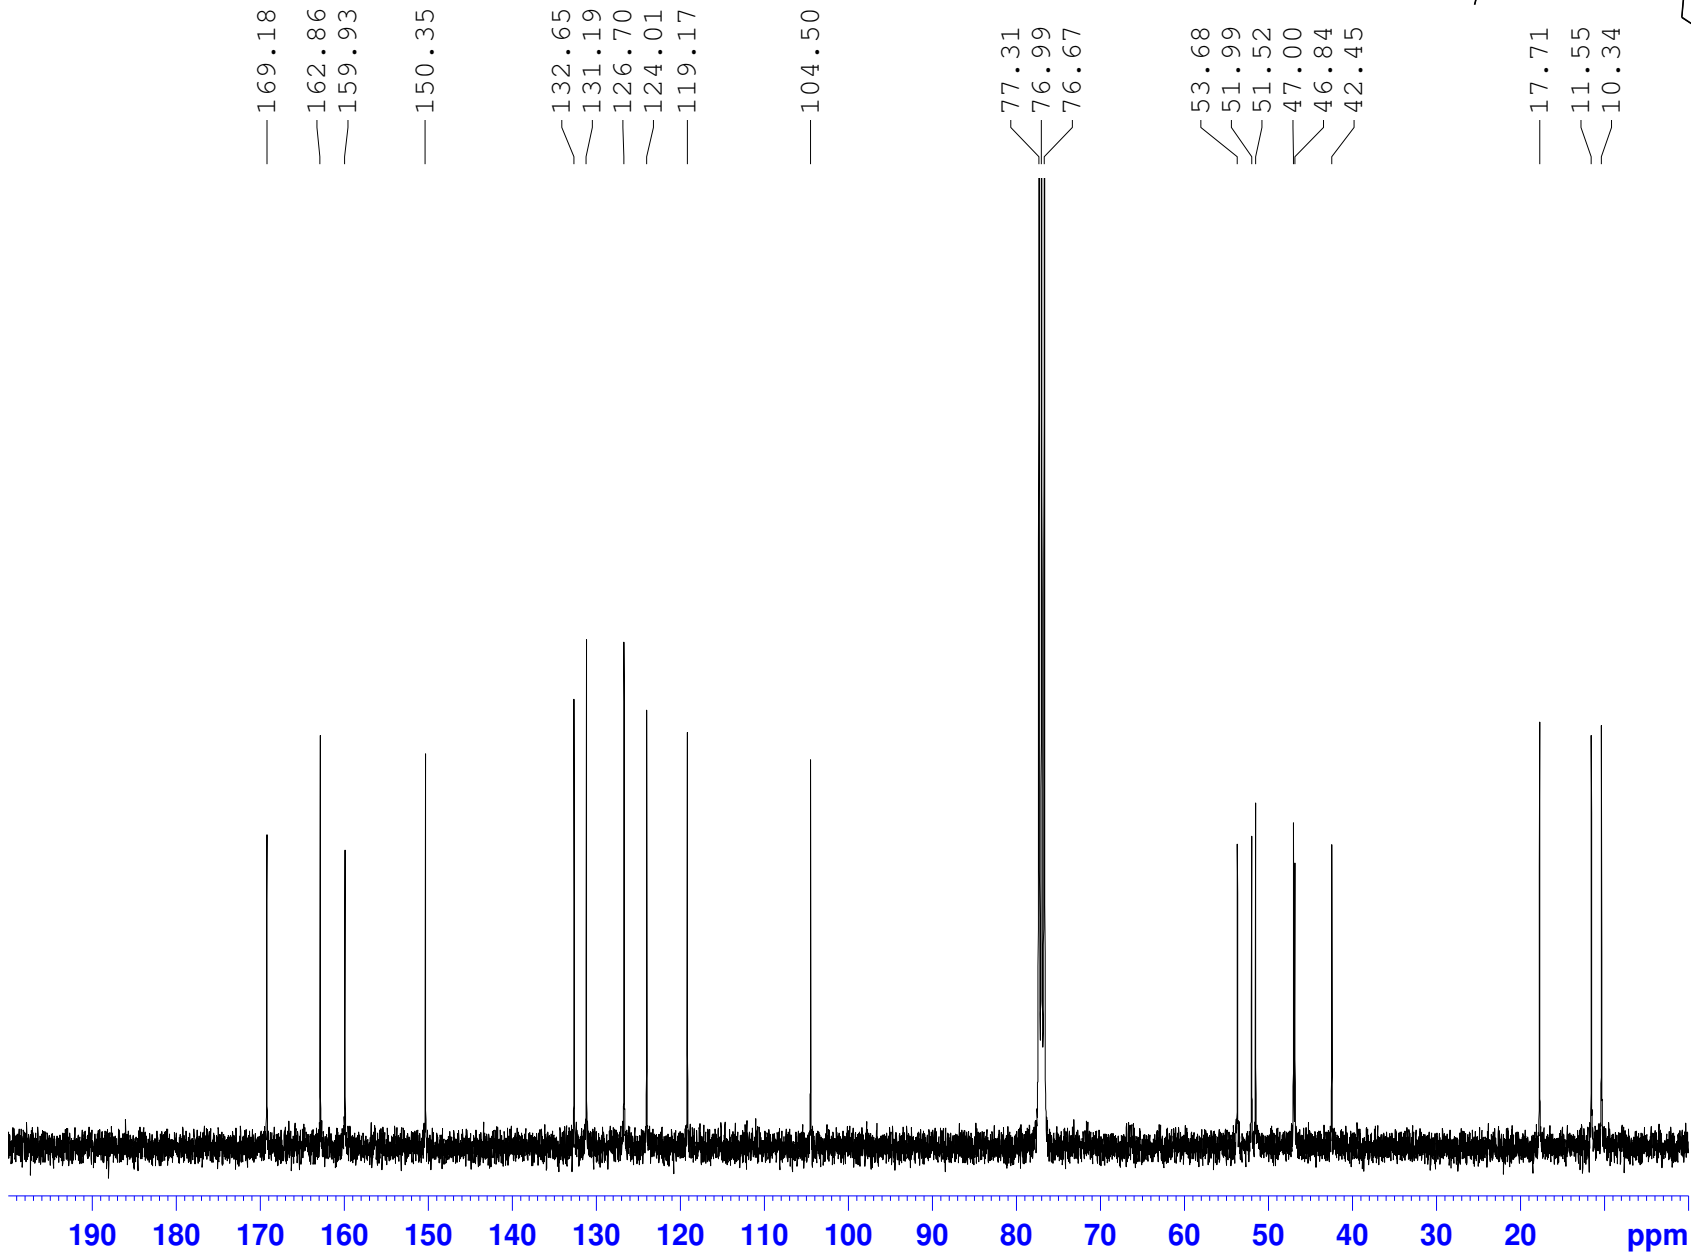

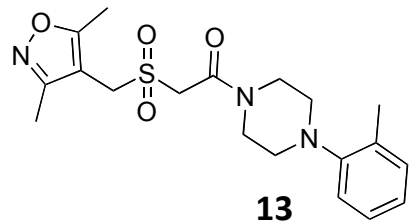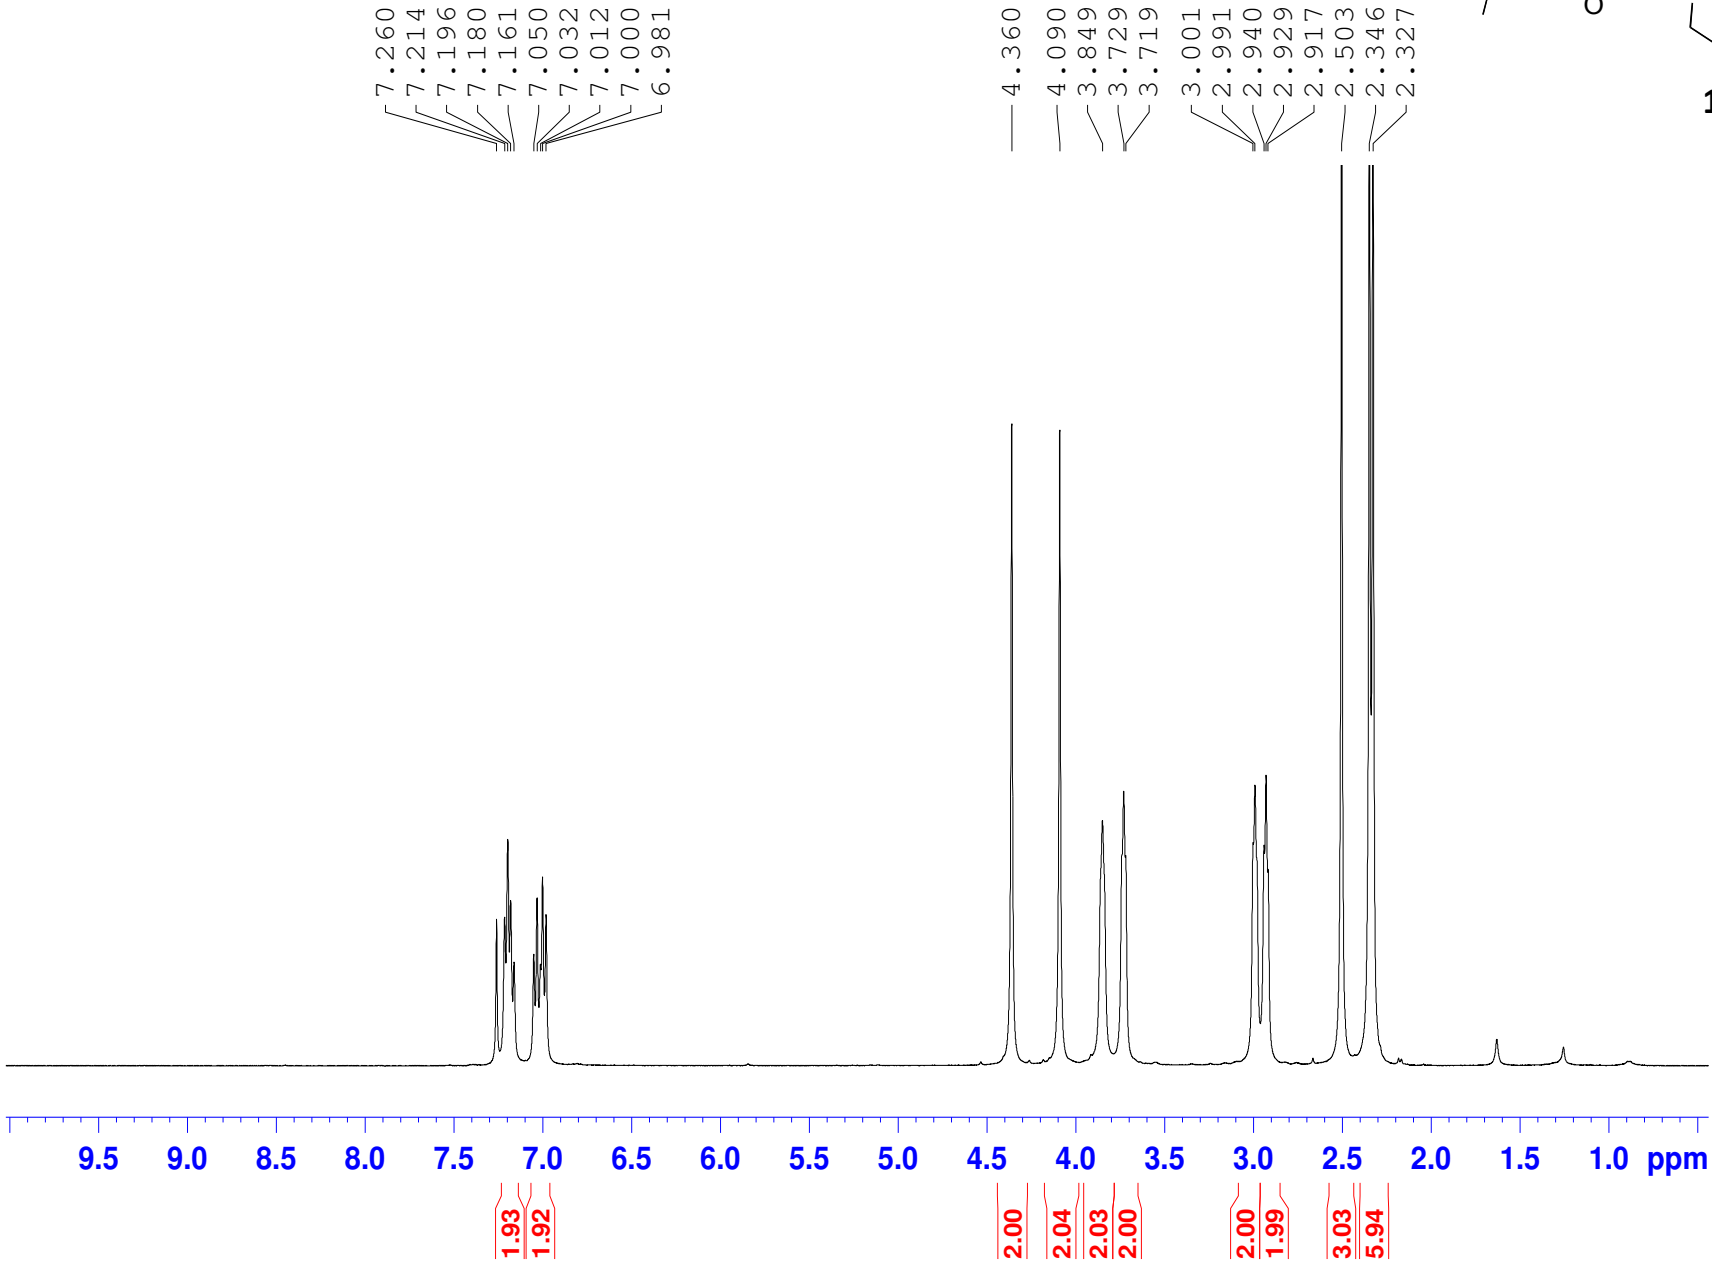

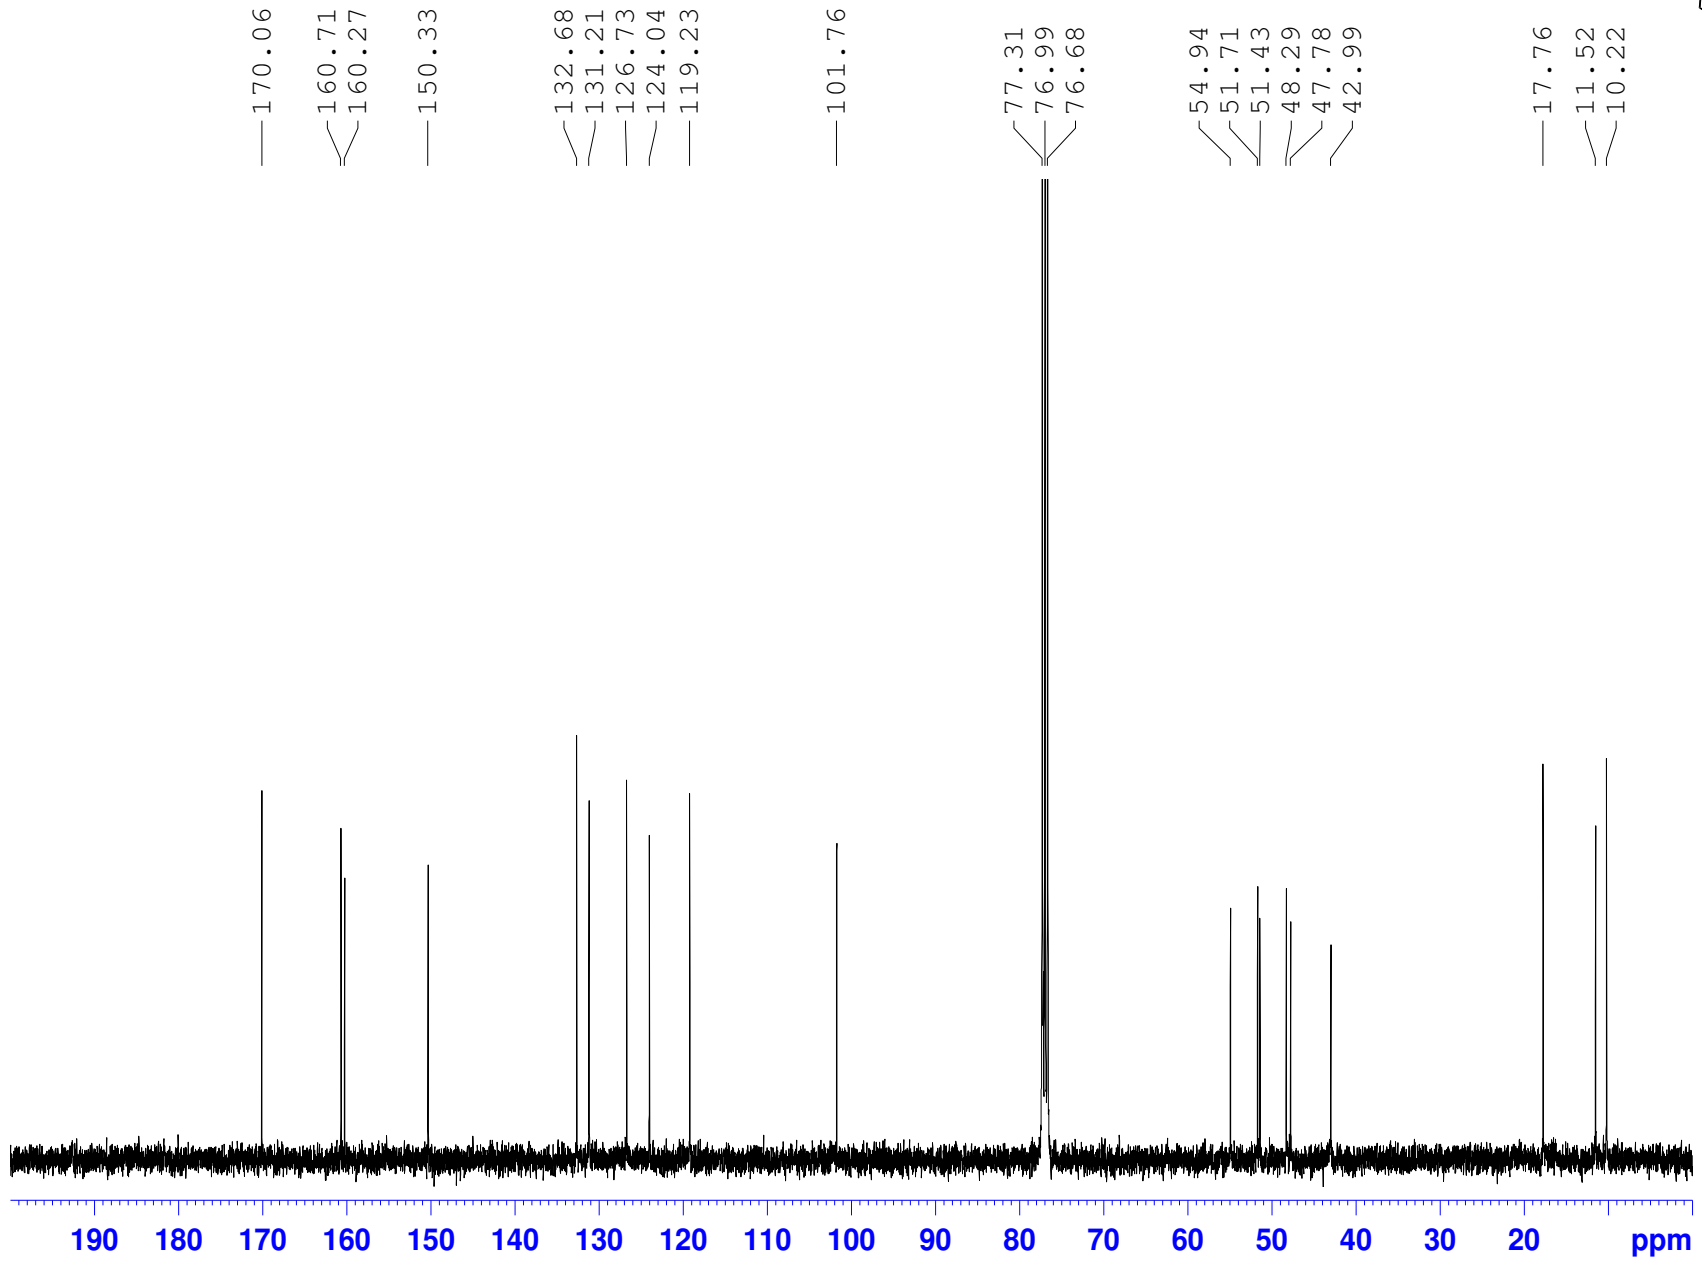

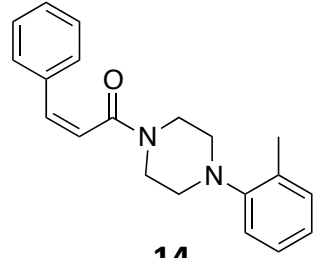**14**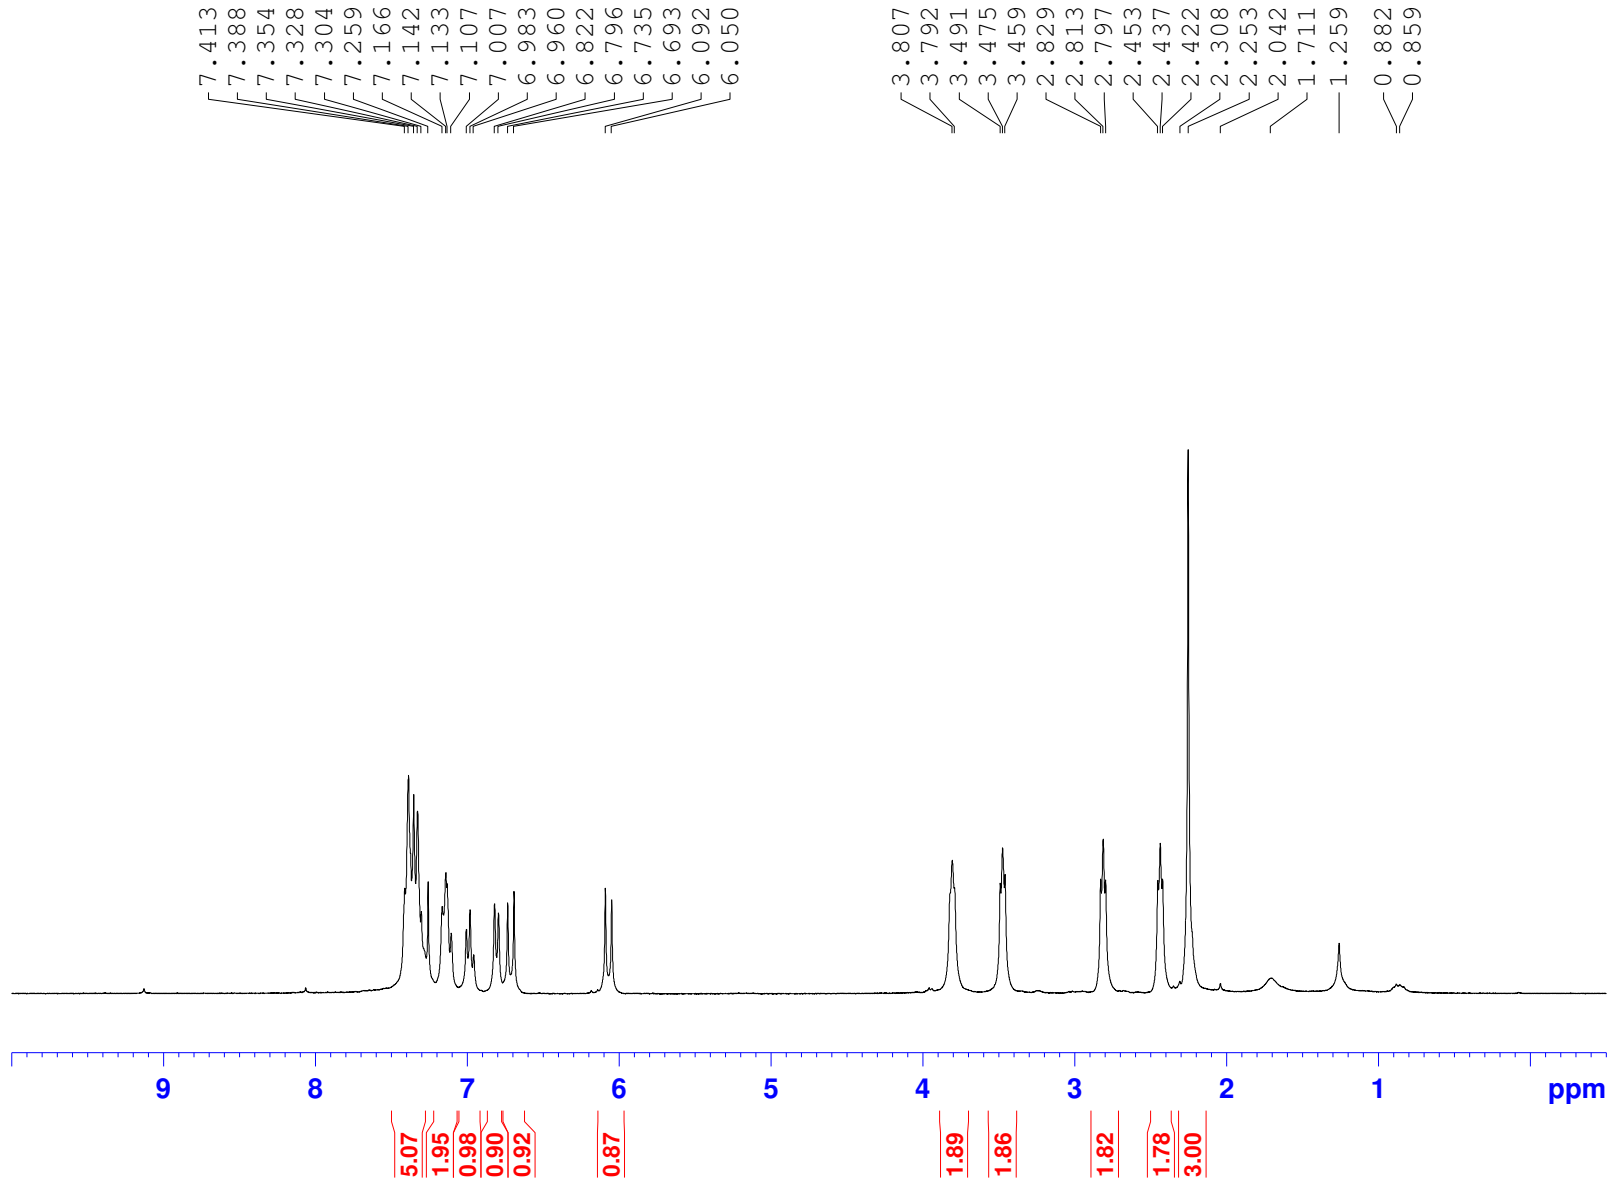



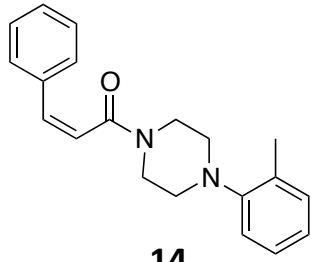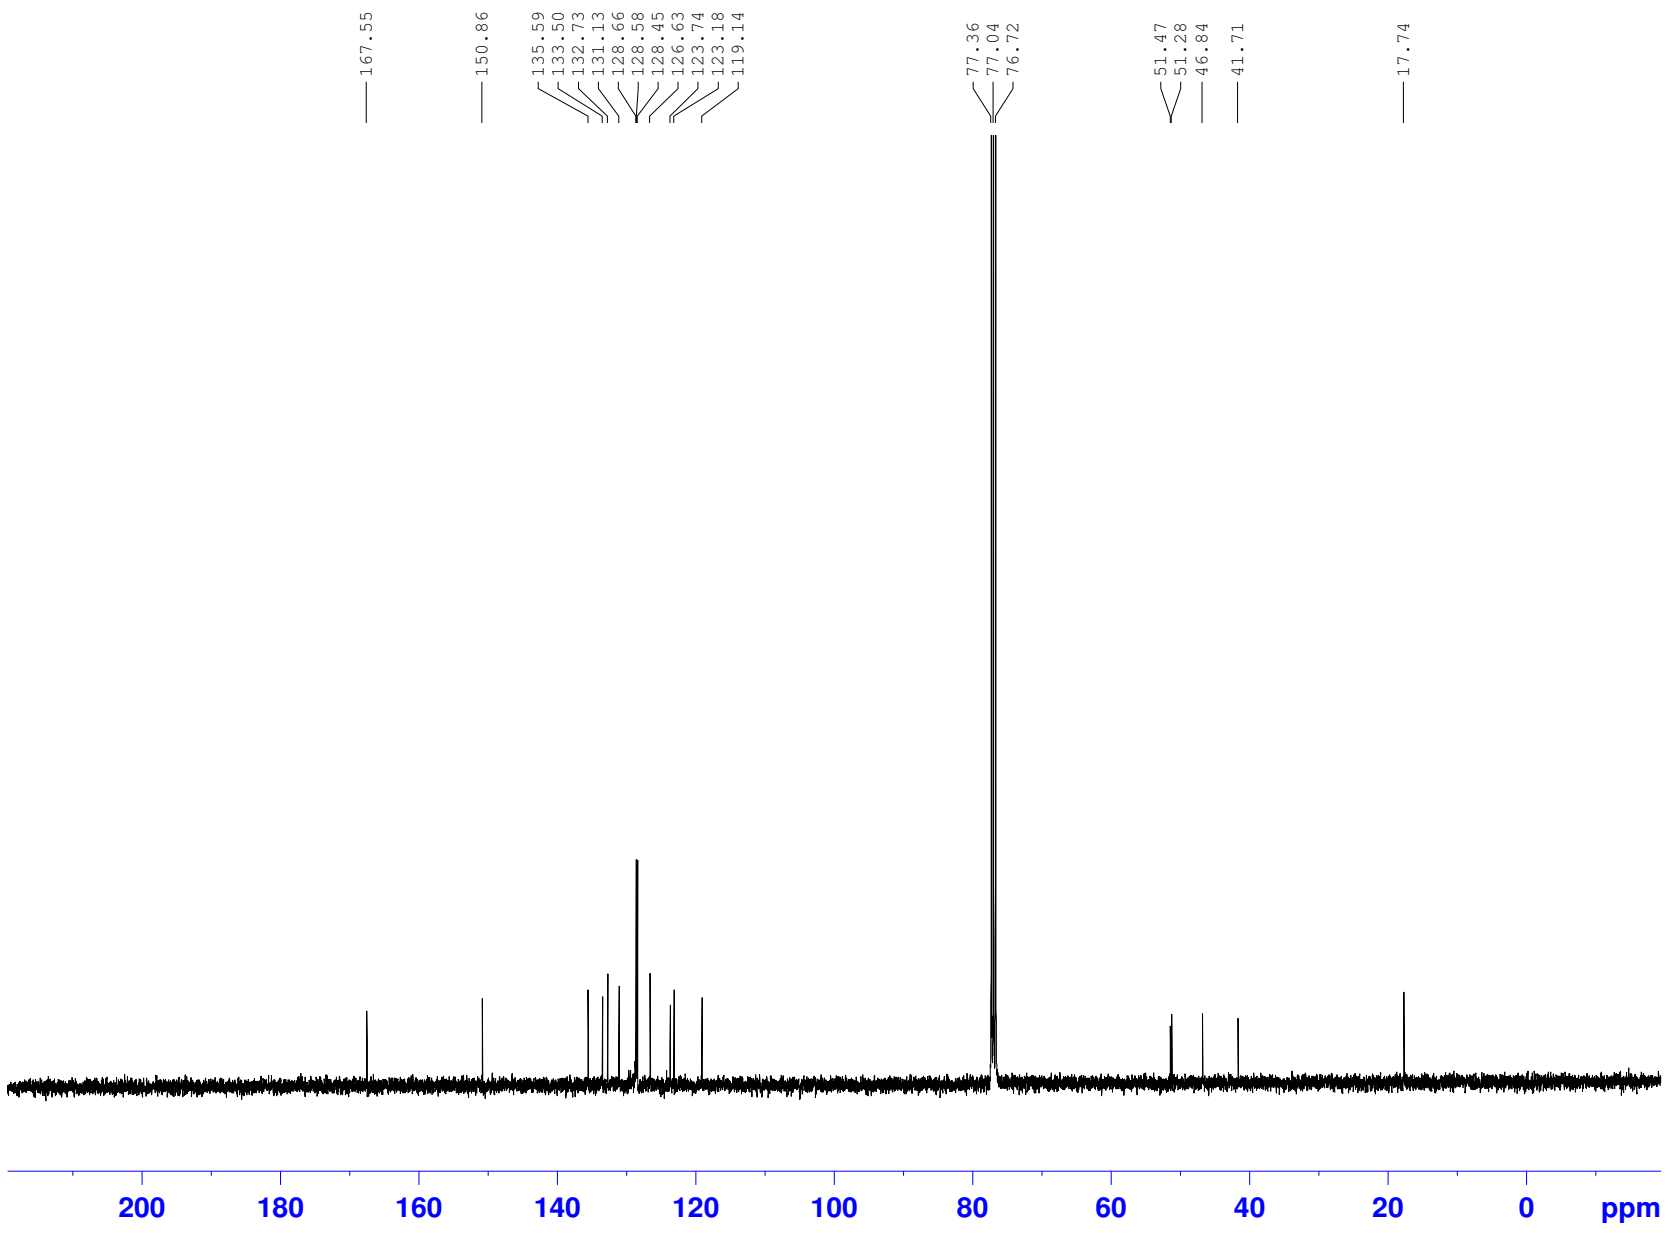

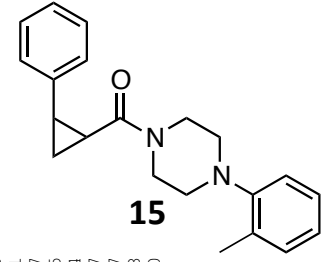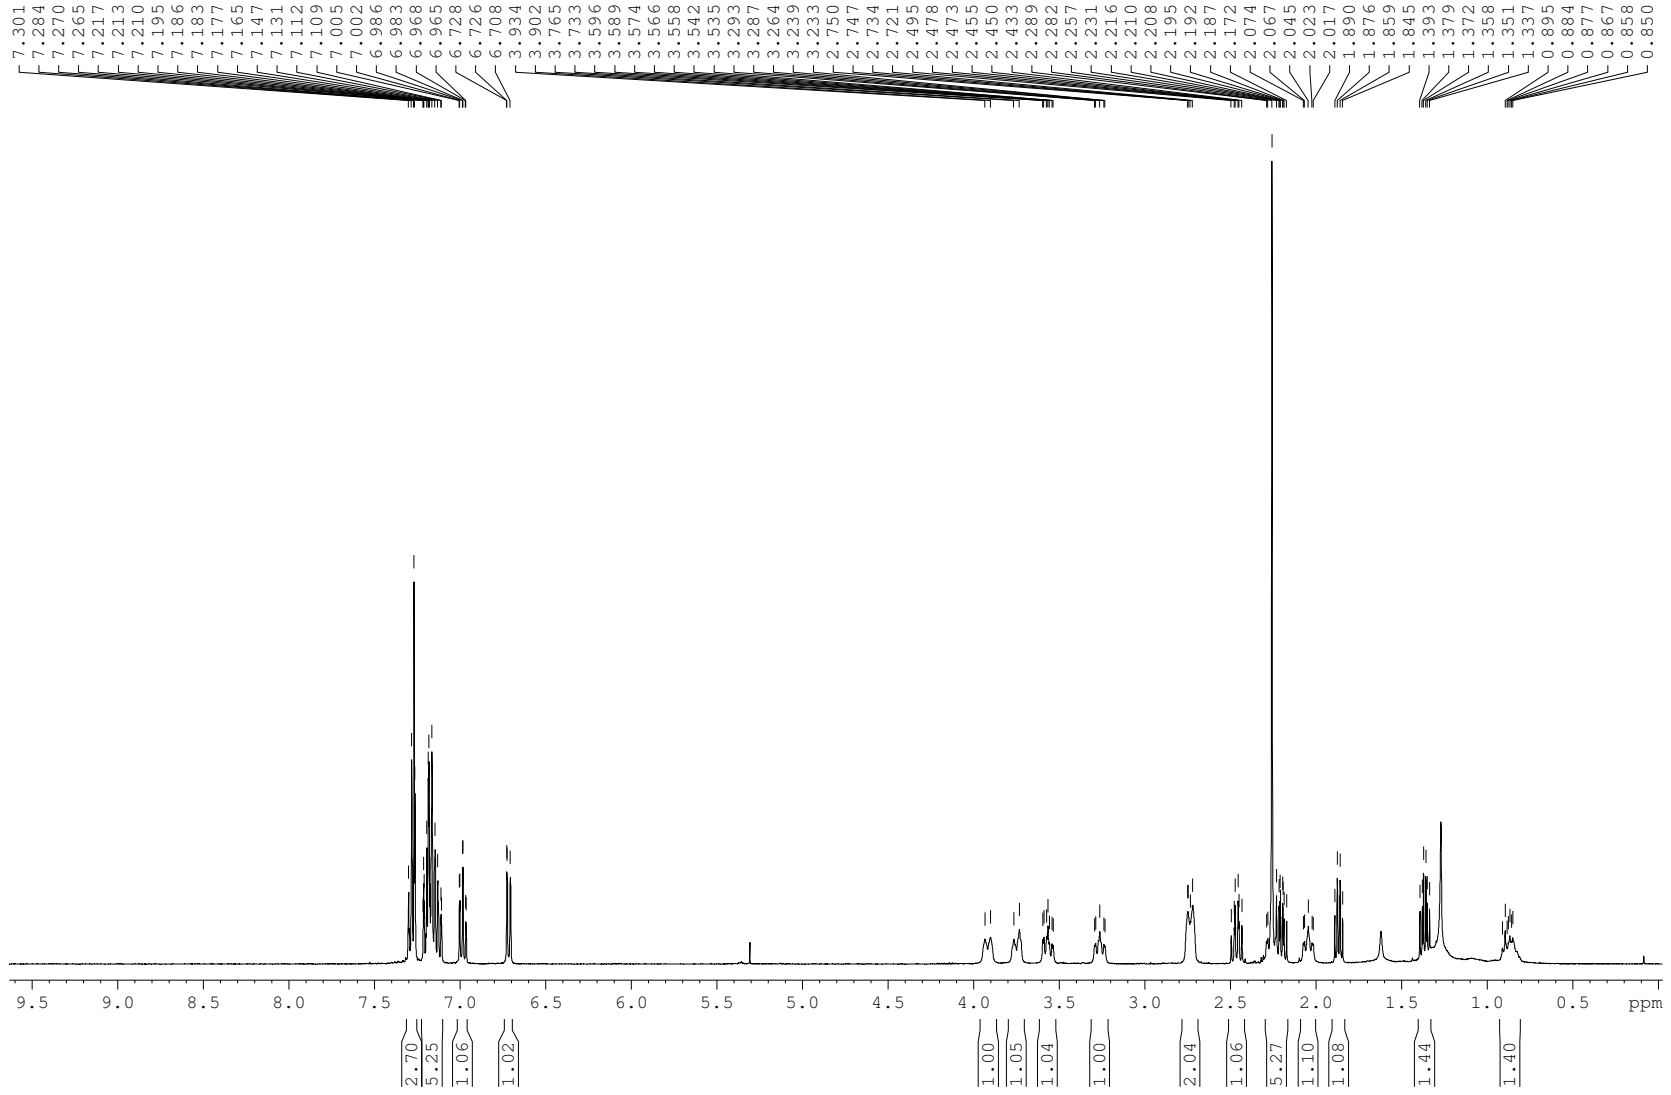

S91

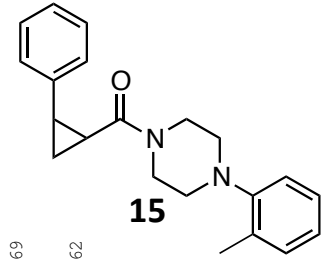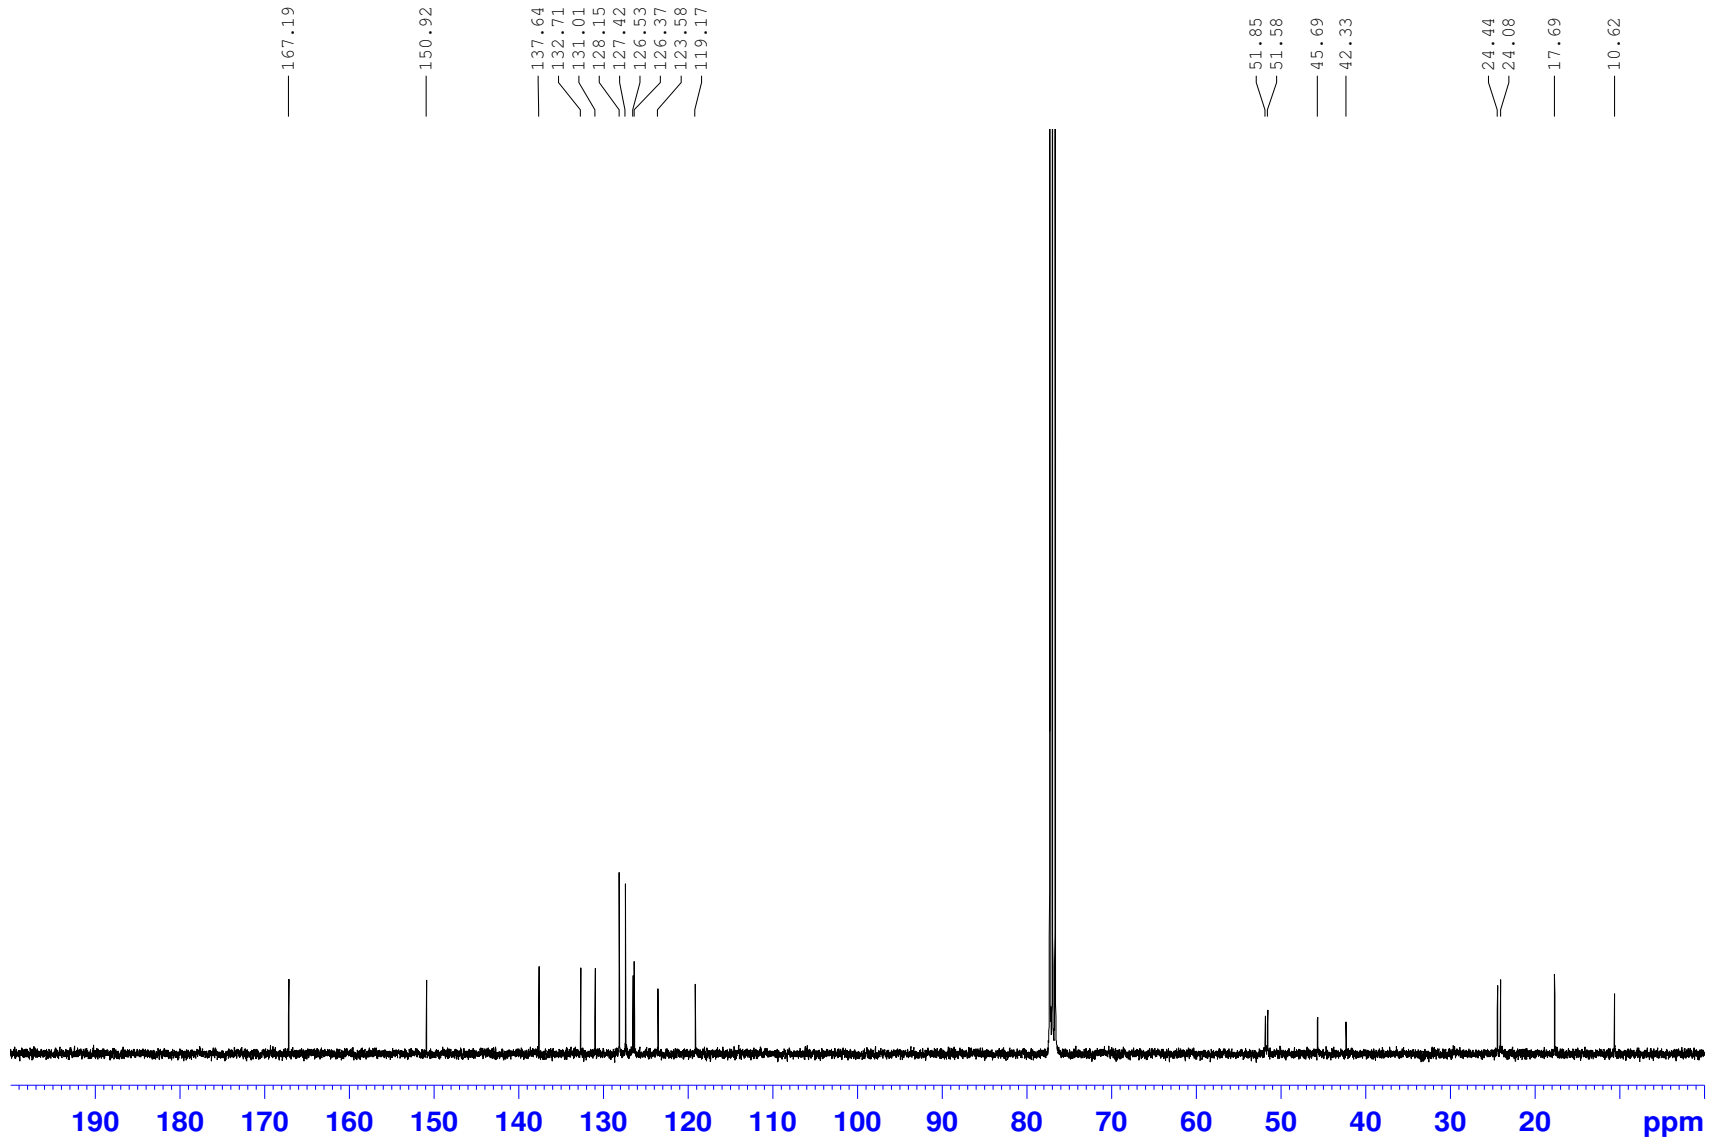

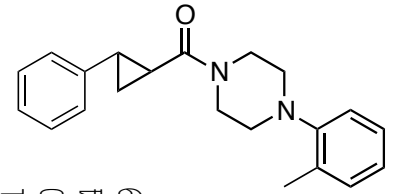**16**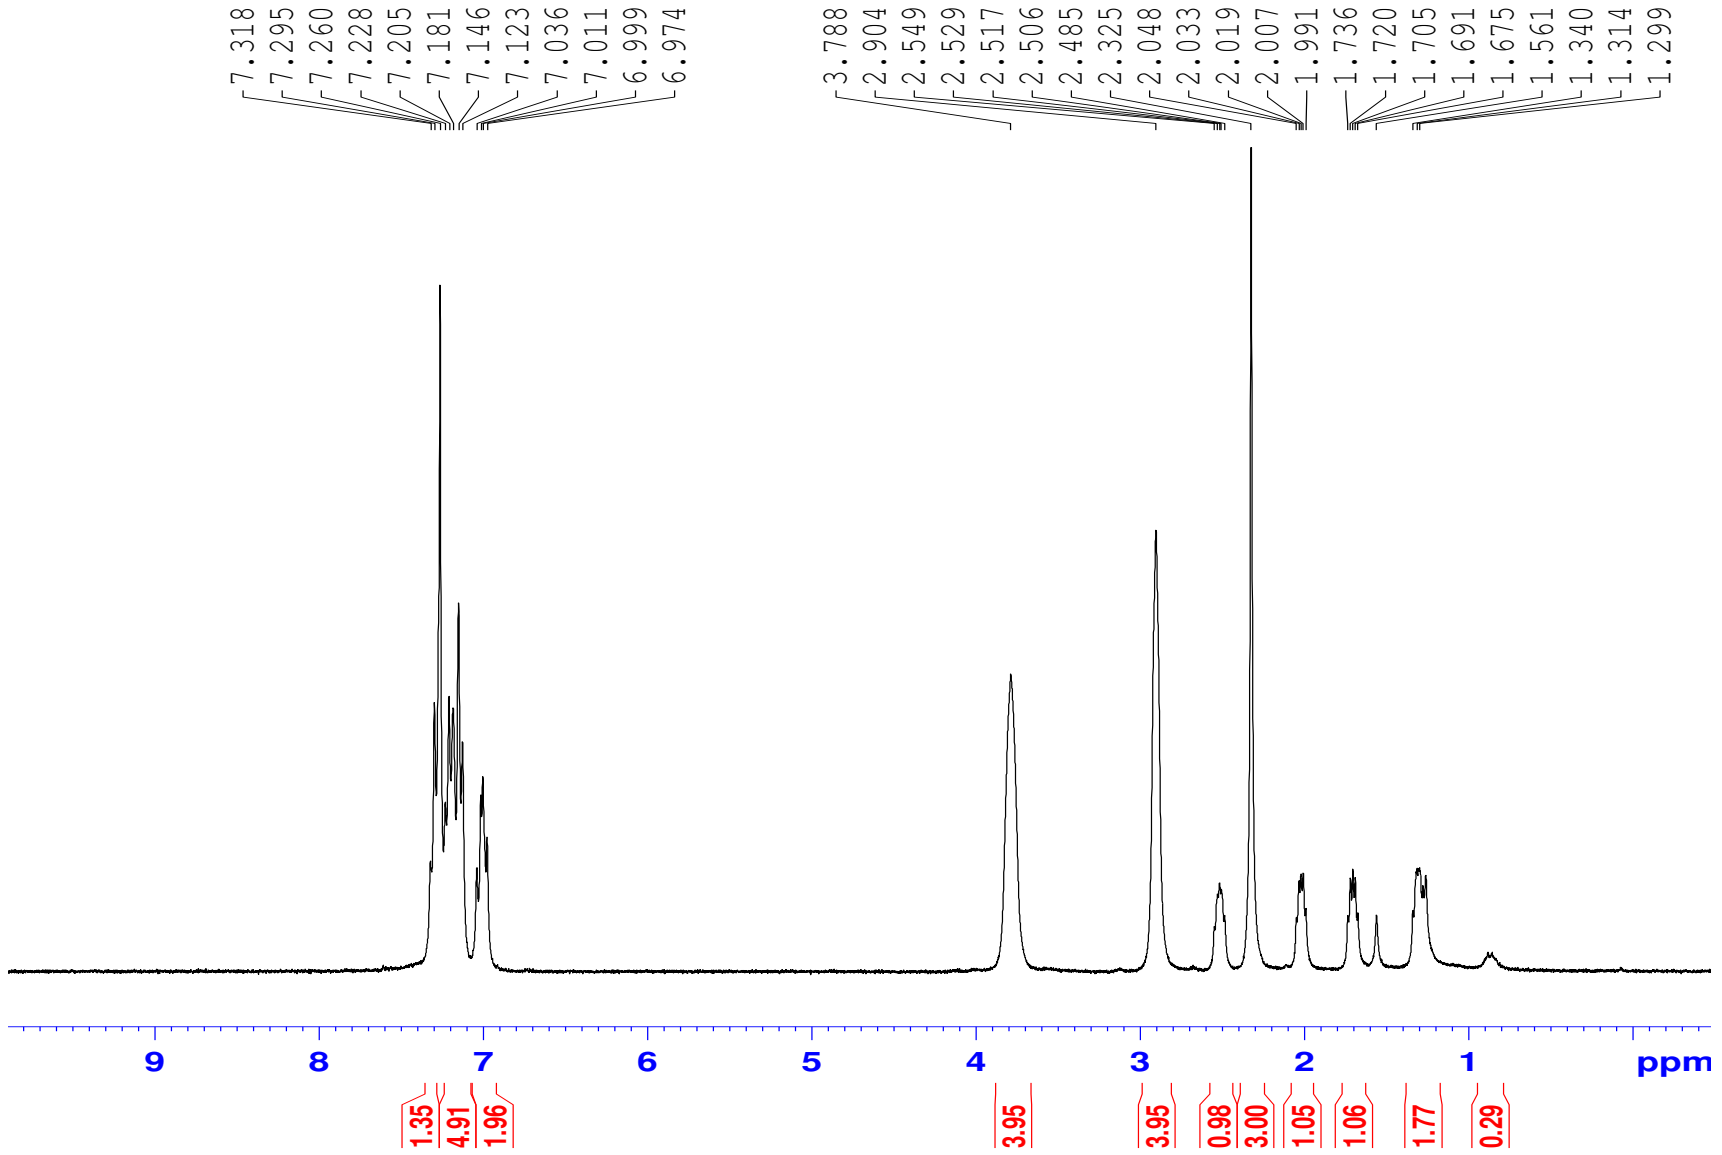

S93

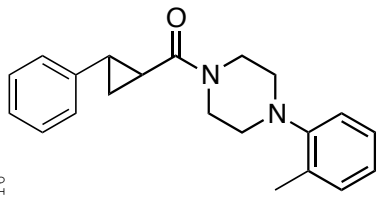

**16**

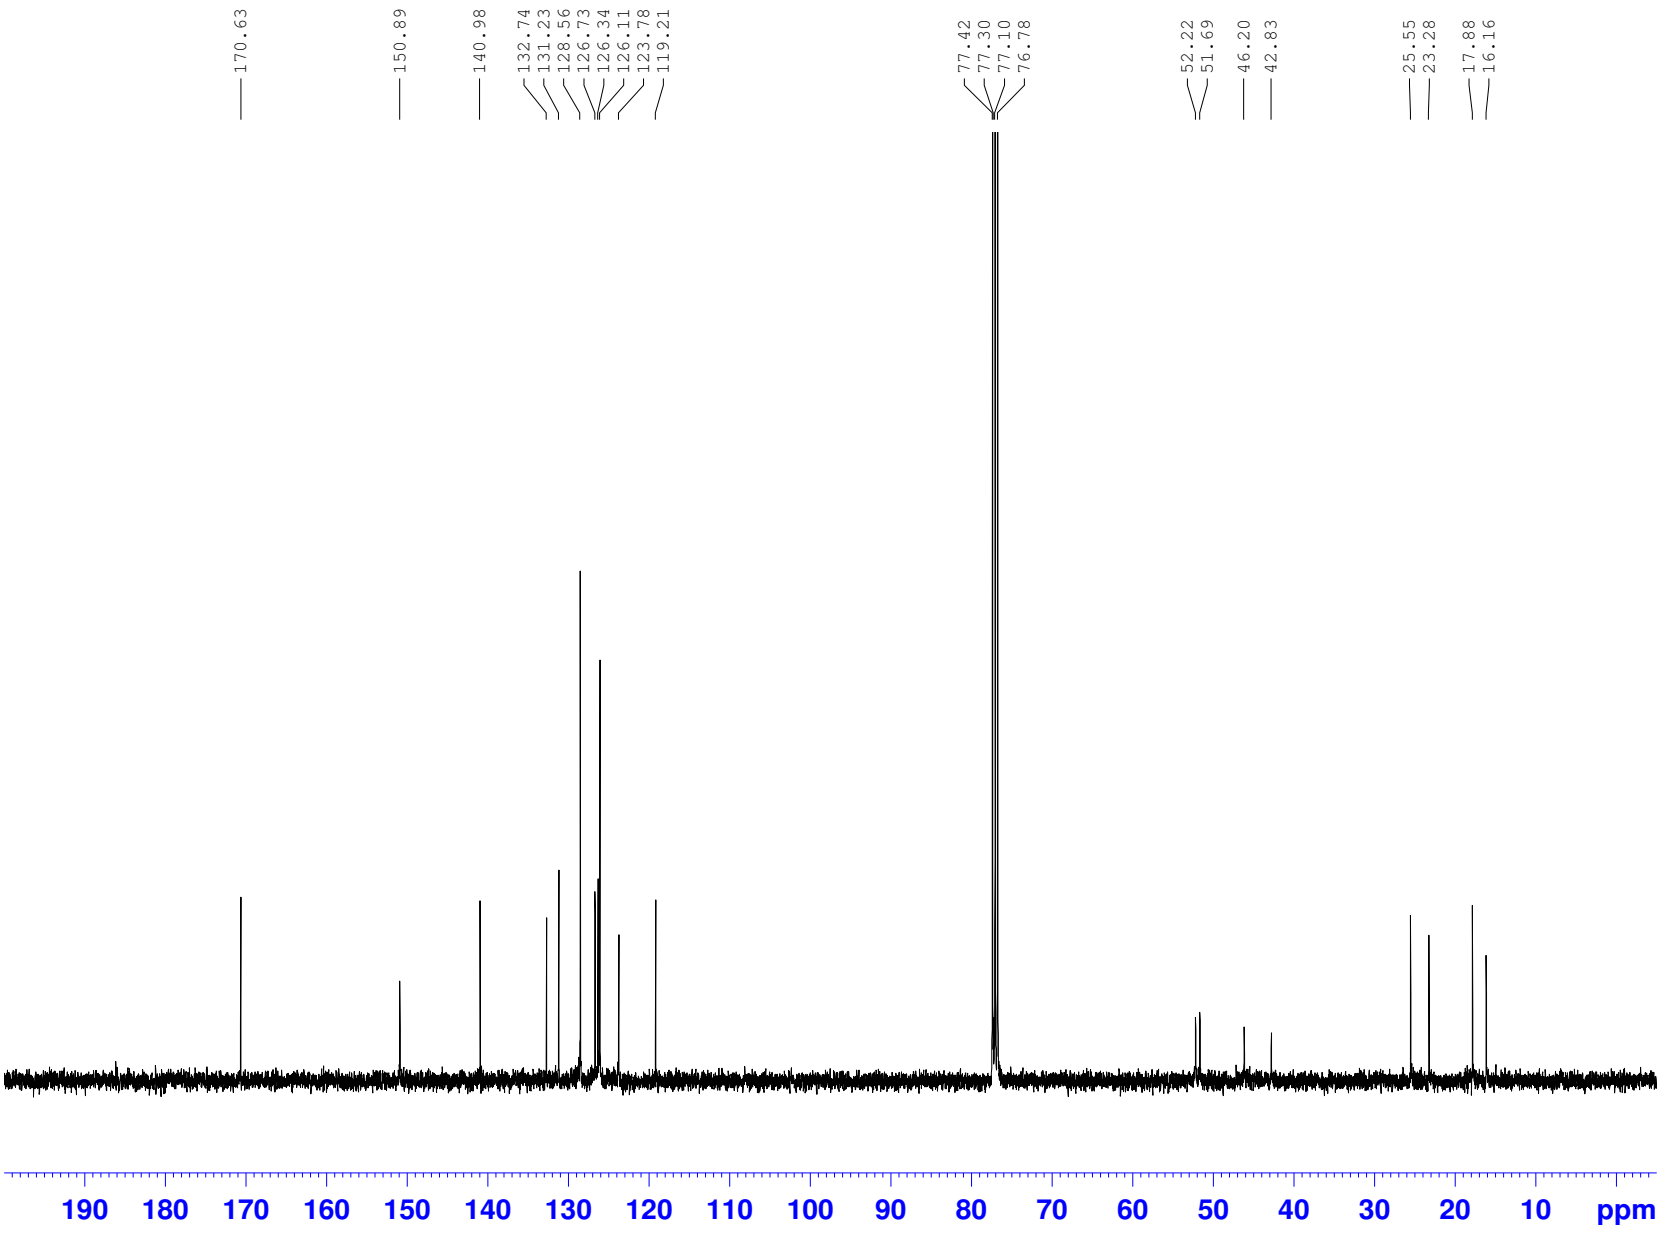

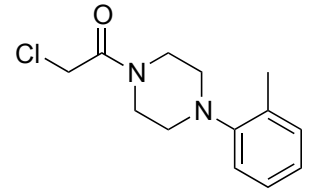**17a**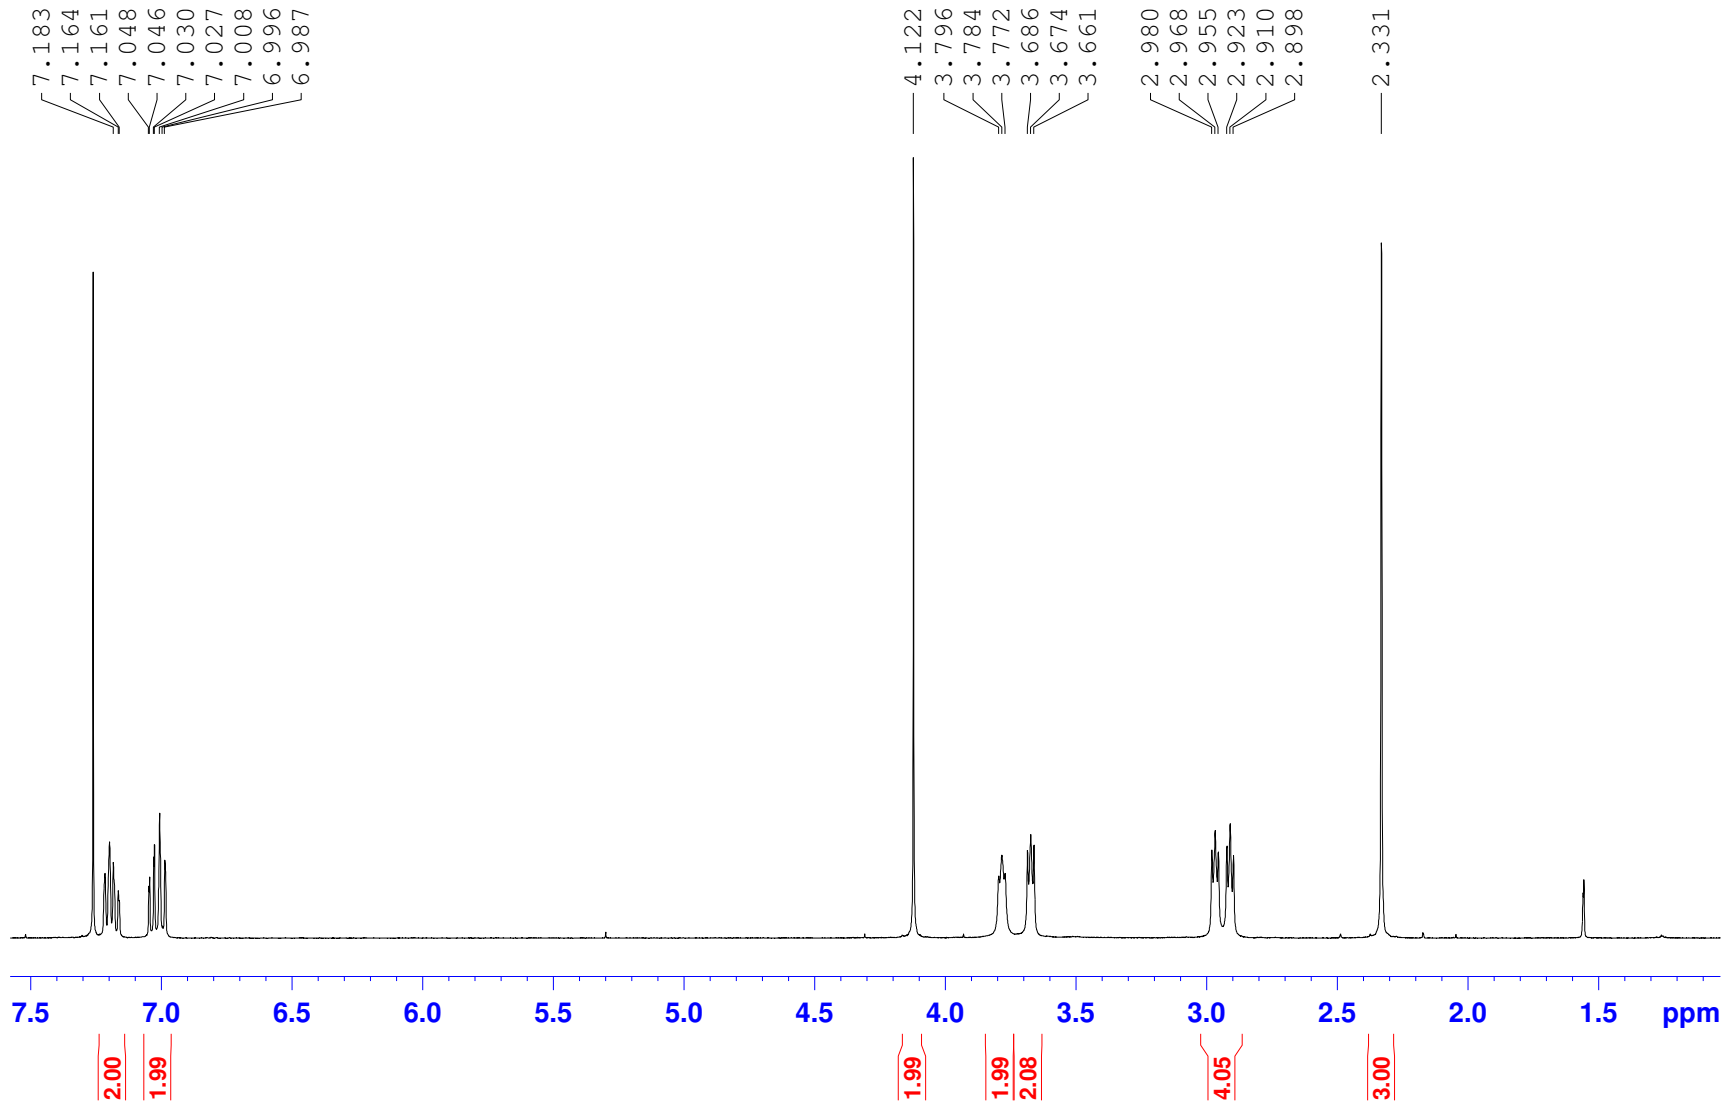

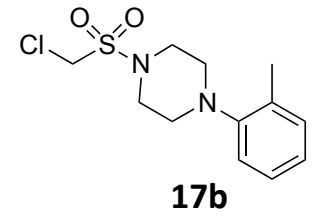71-548-1-CDCl<sub>3</sub>-300Mhz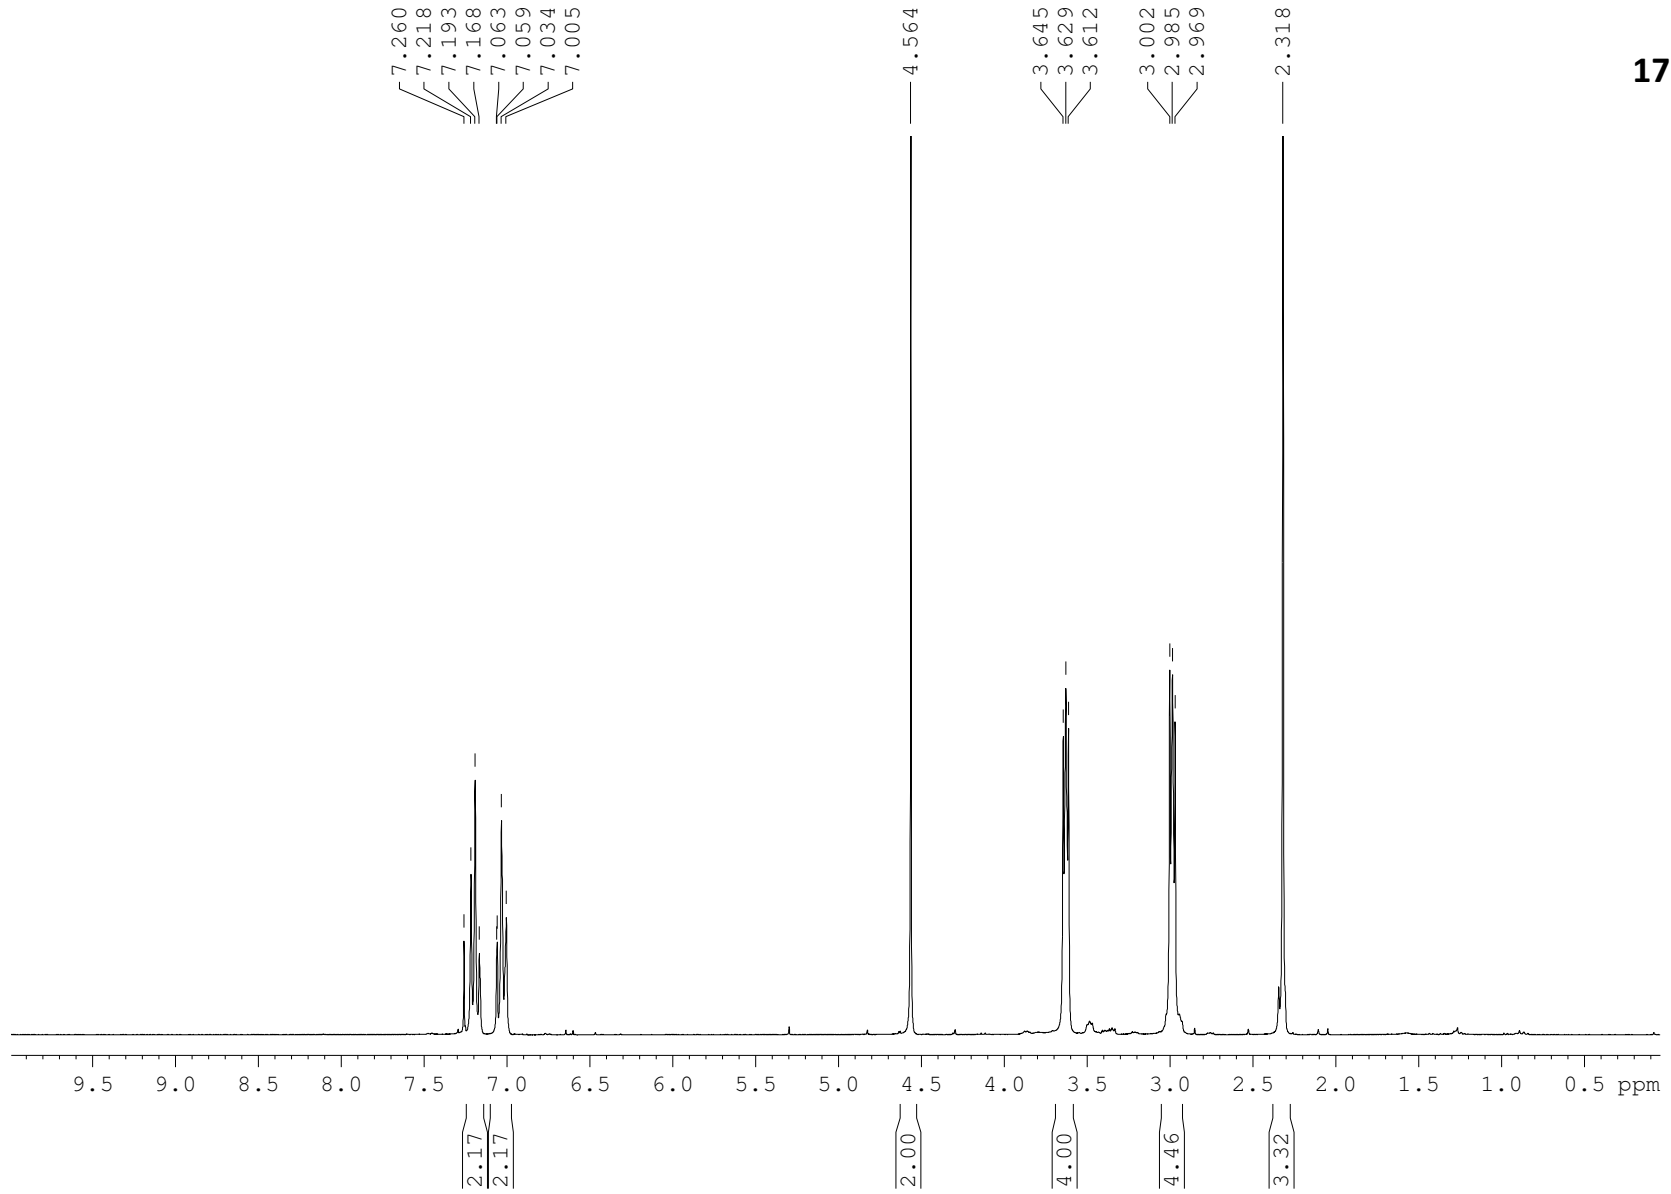

S96

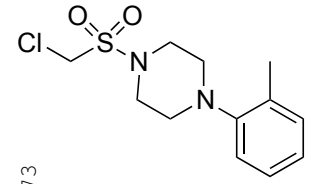

**17b**

71-548-1-CDC13-300Mhz

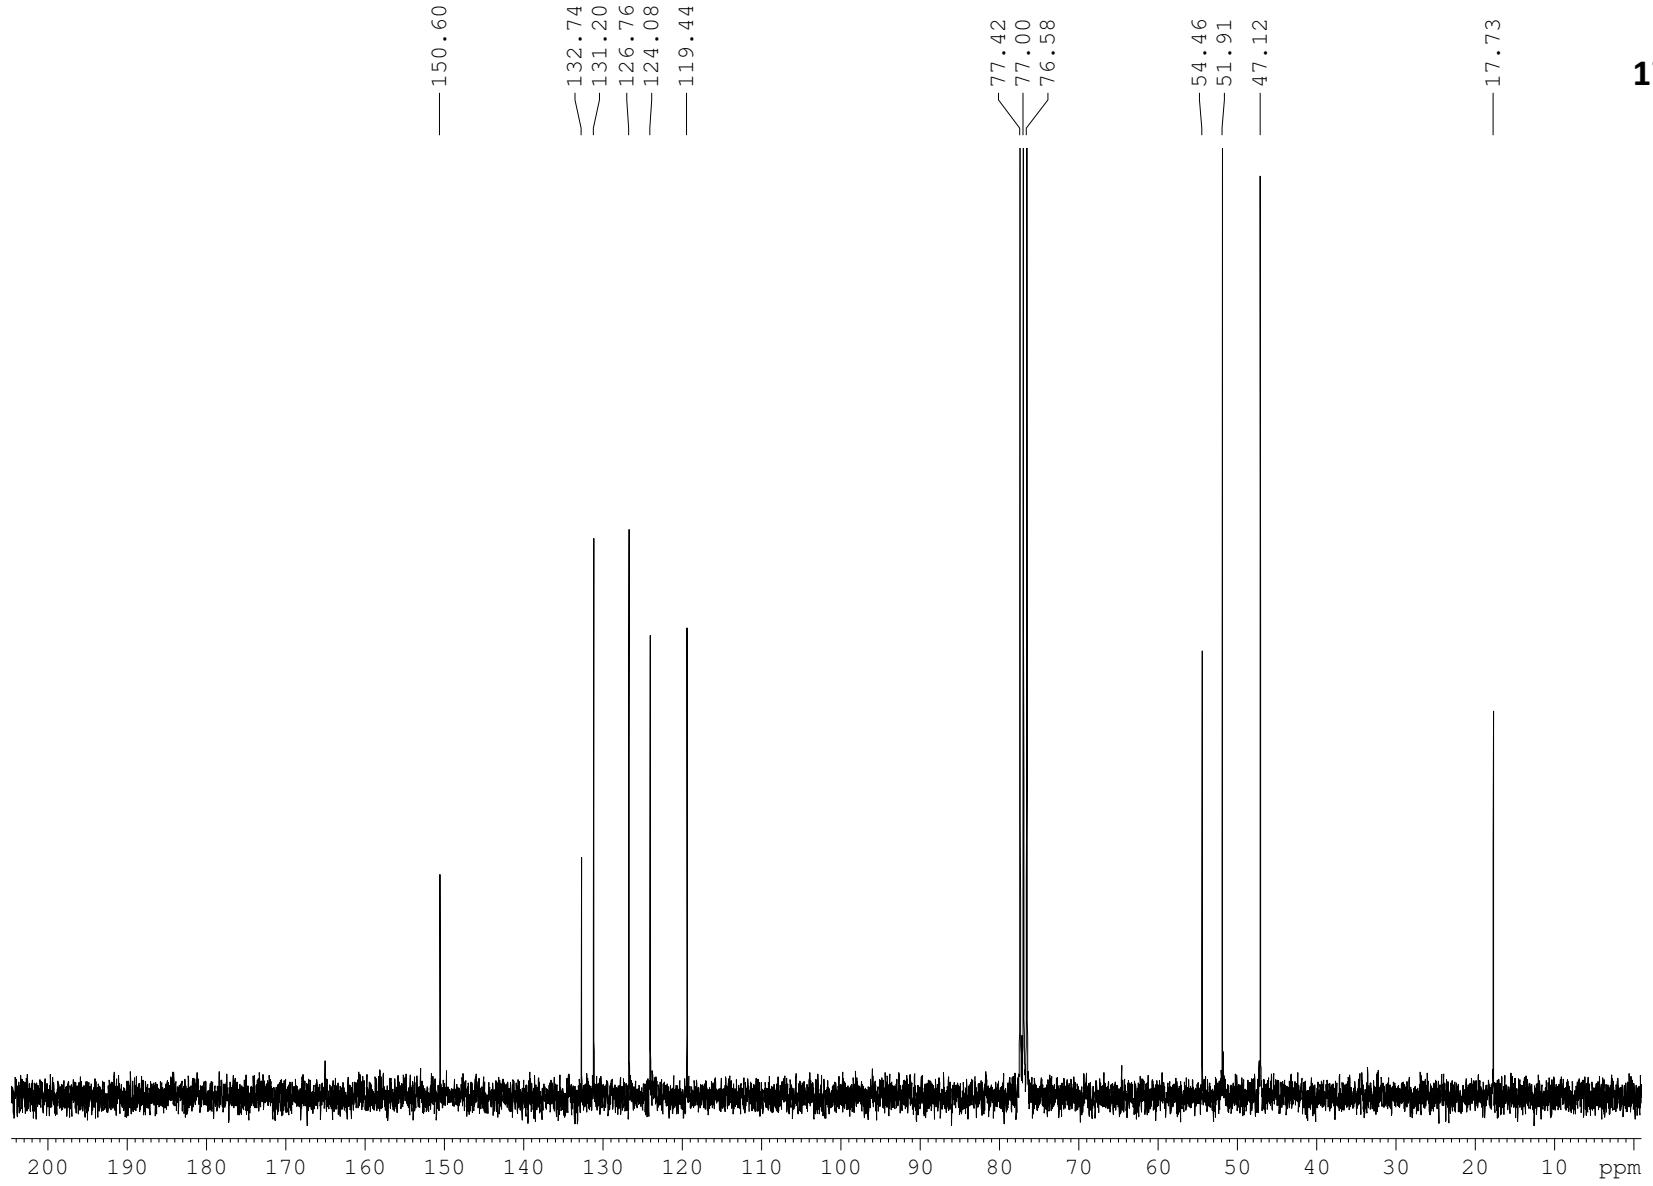



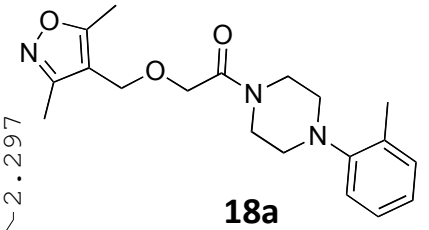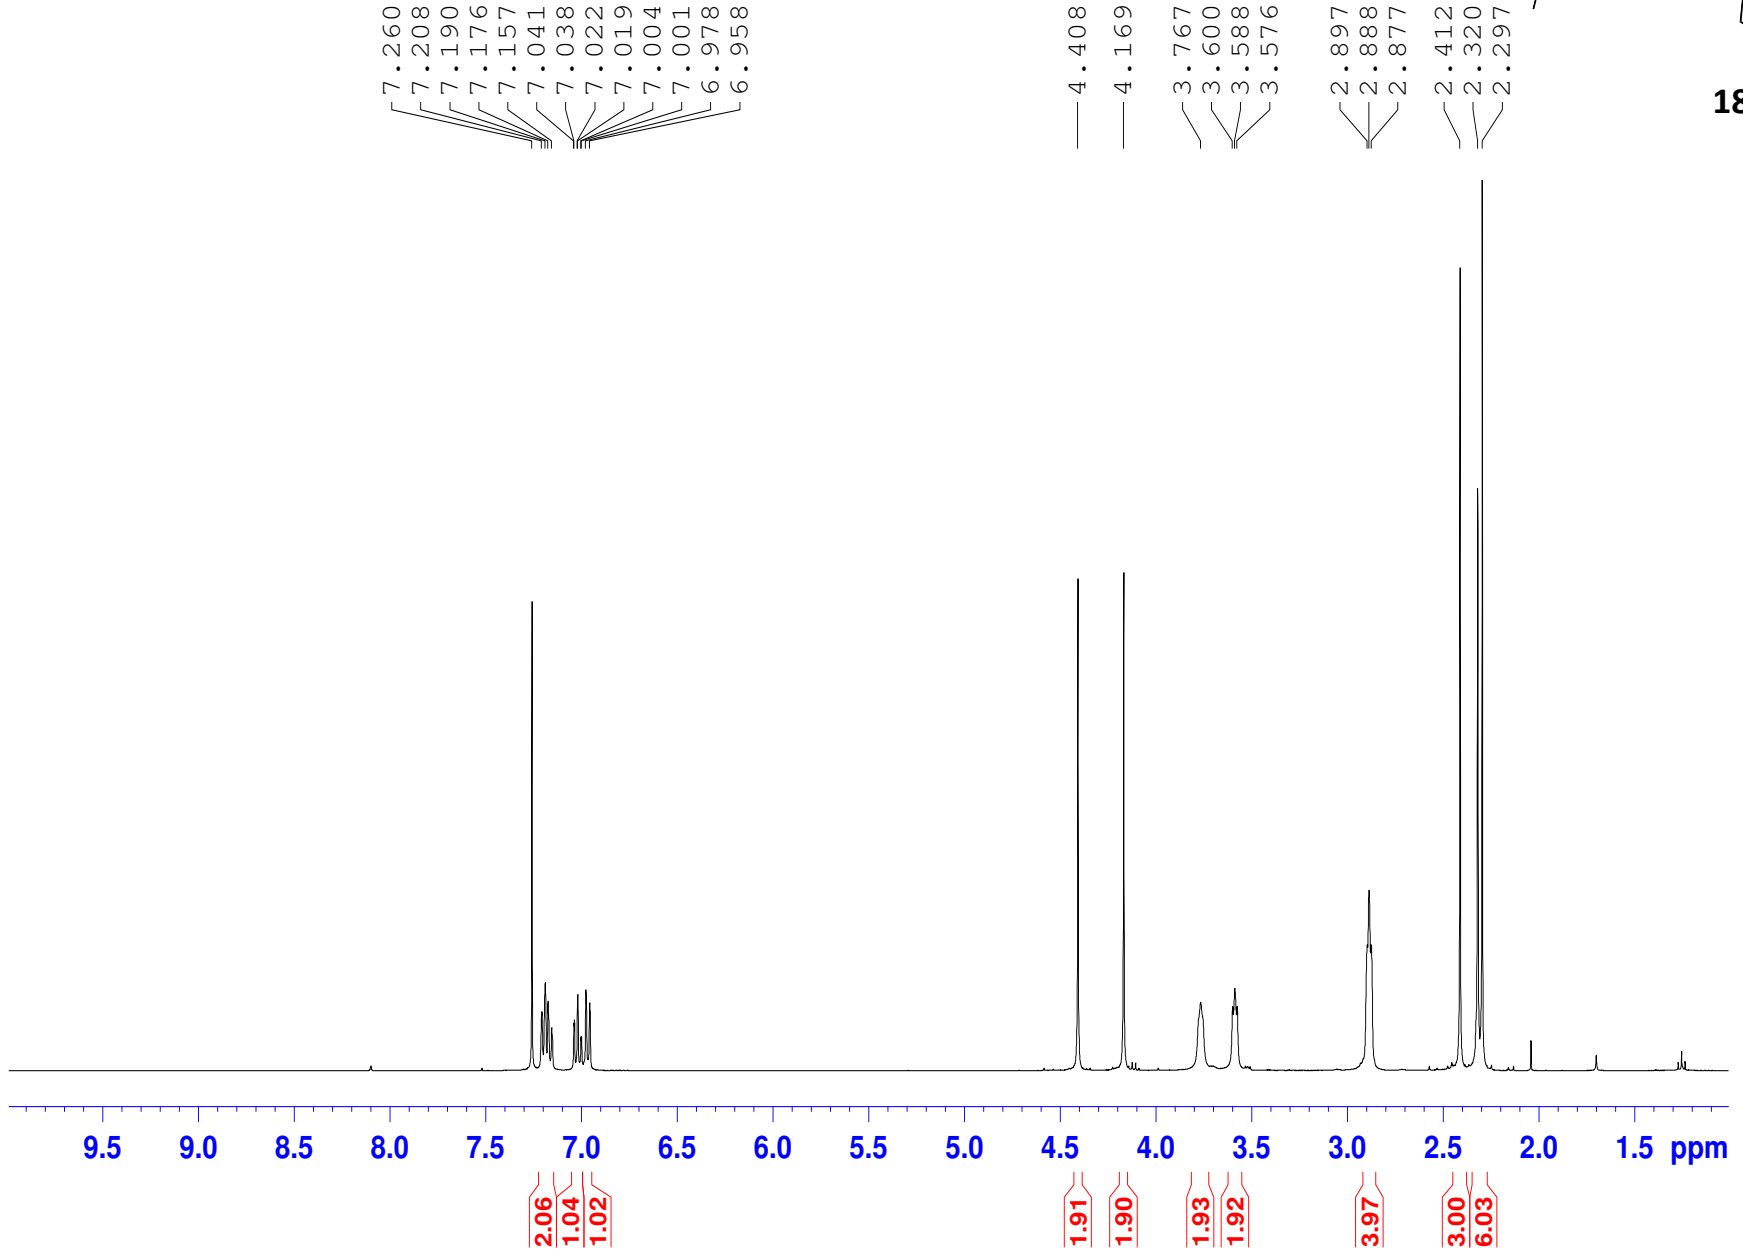

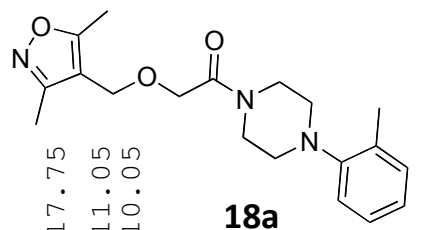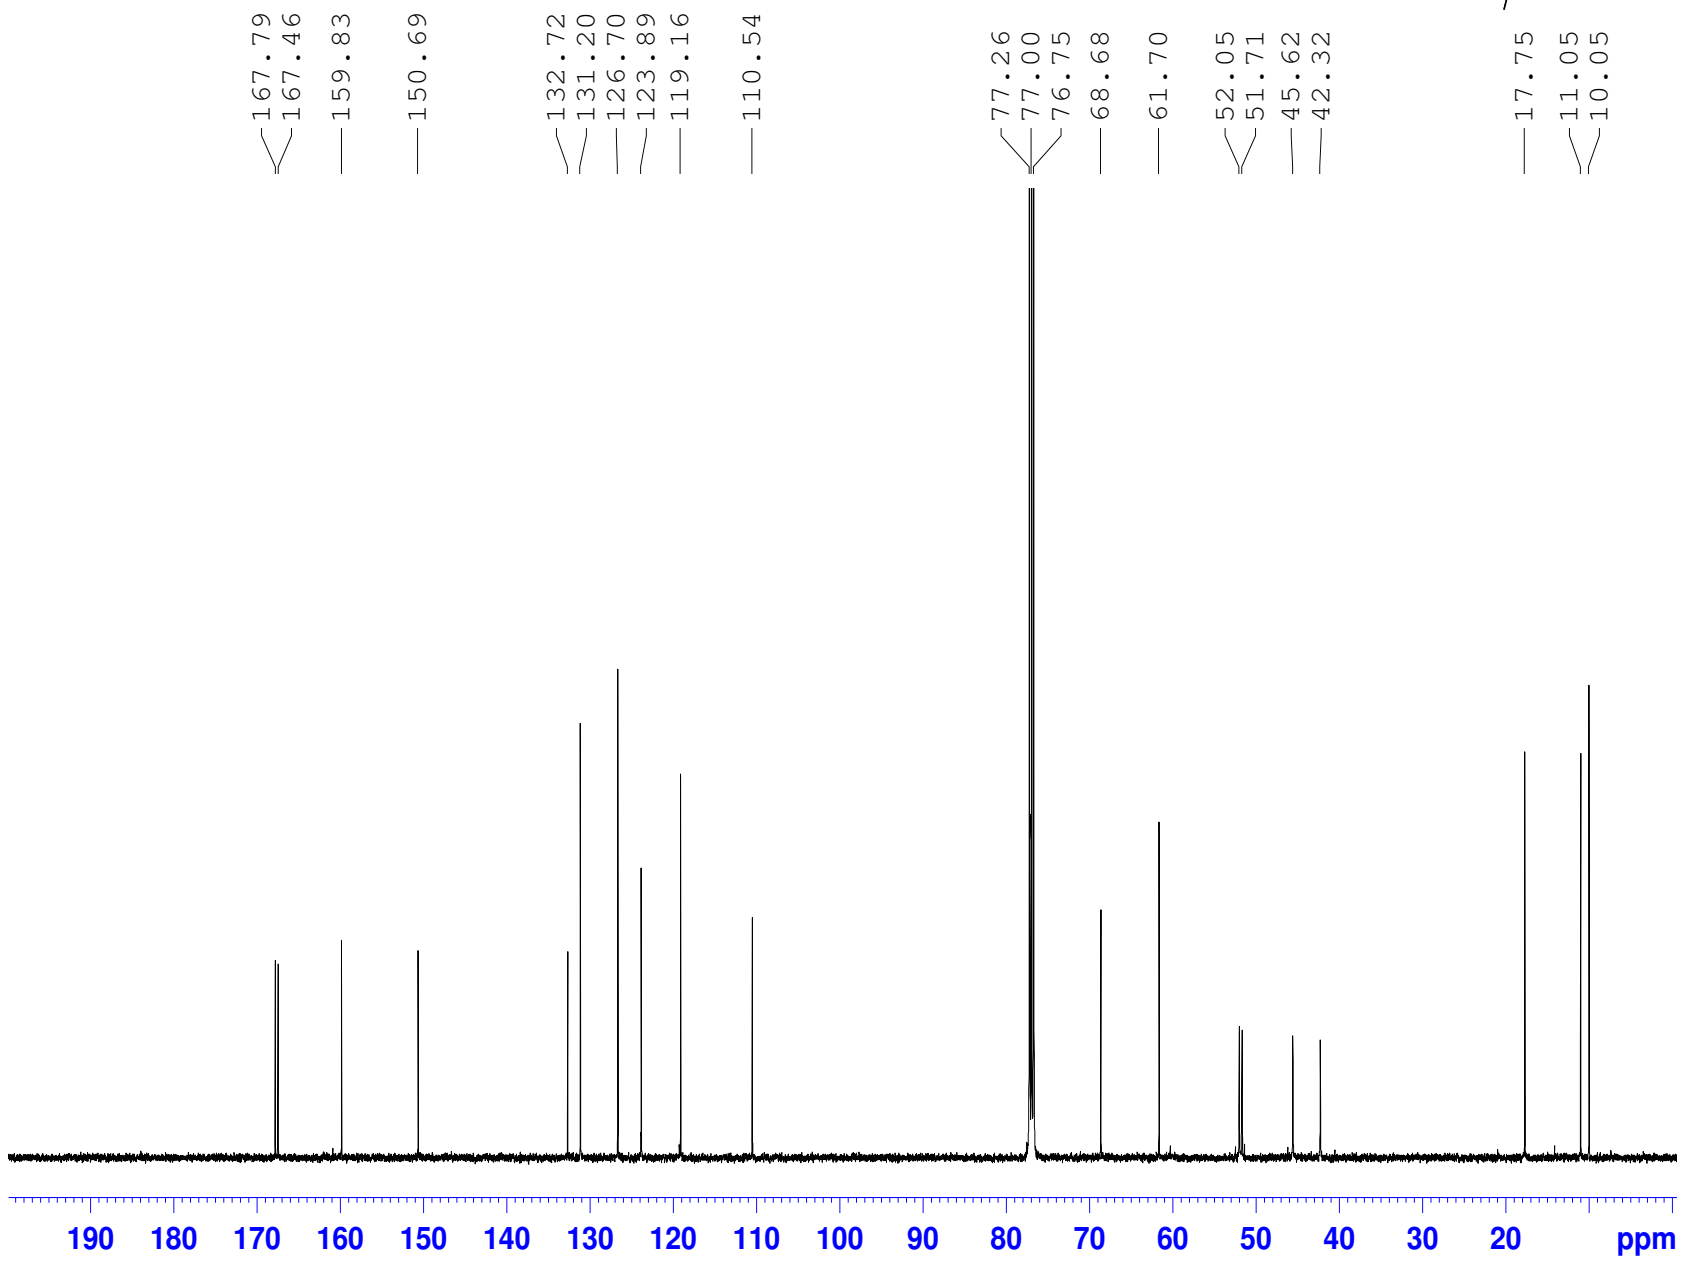

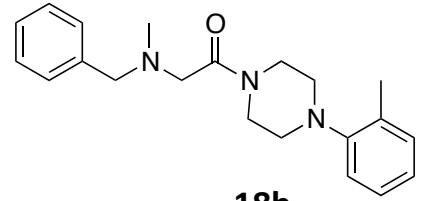**18b**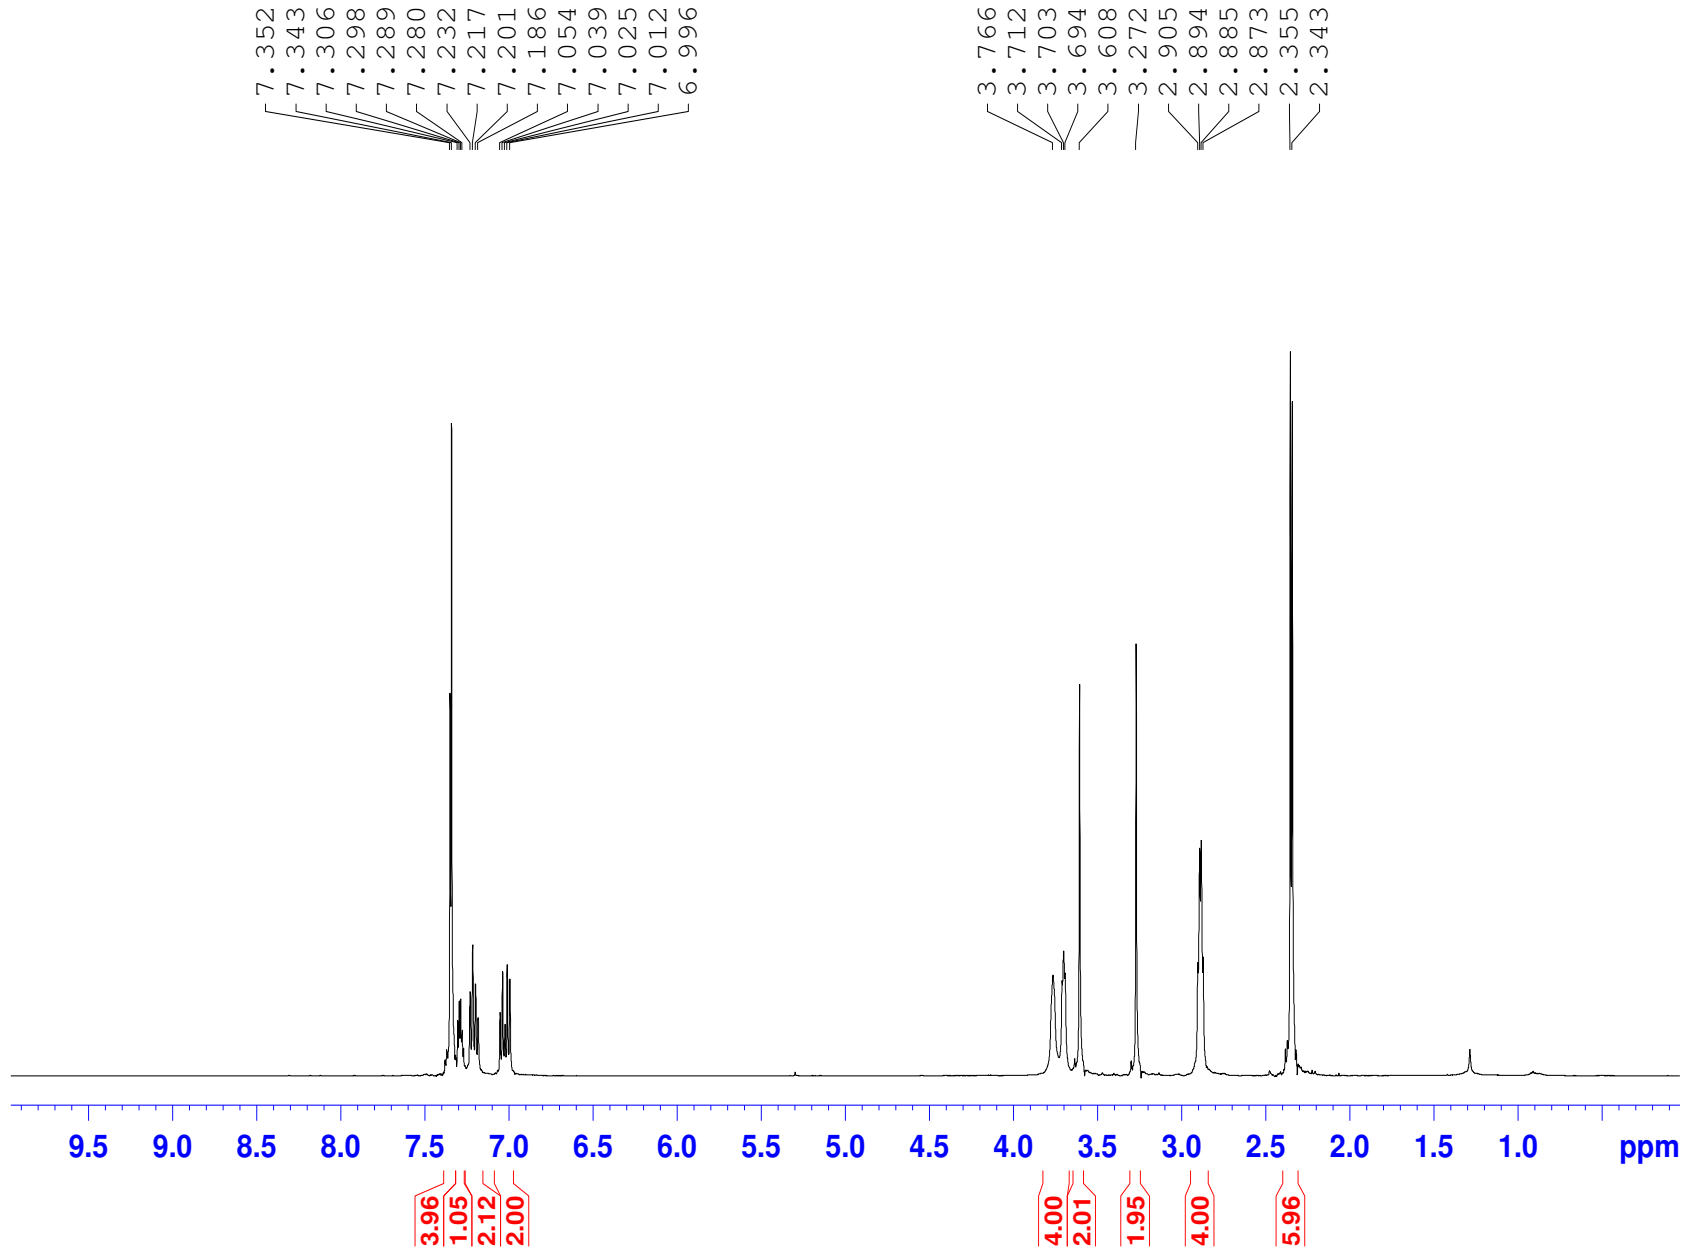

S100

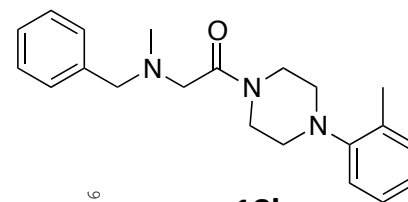

**18b**

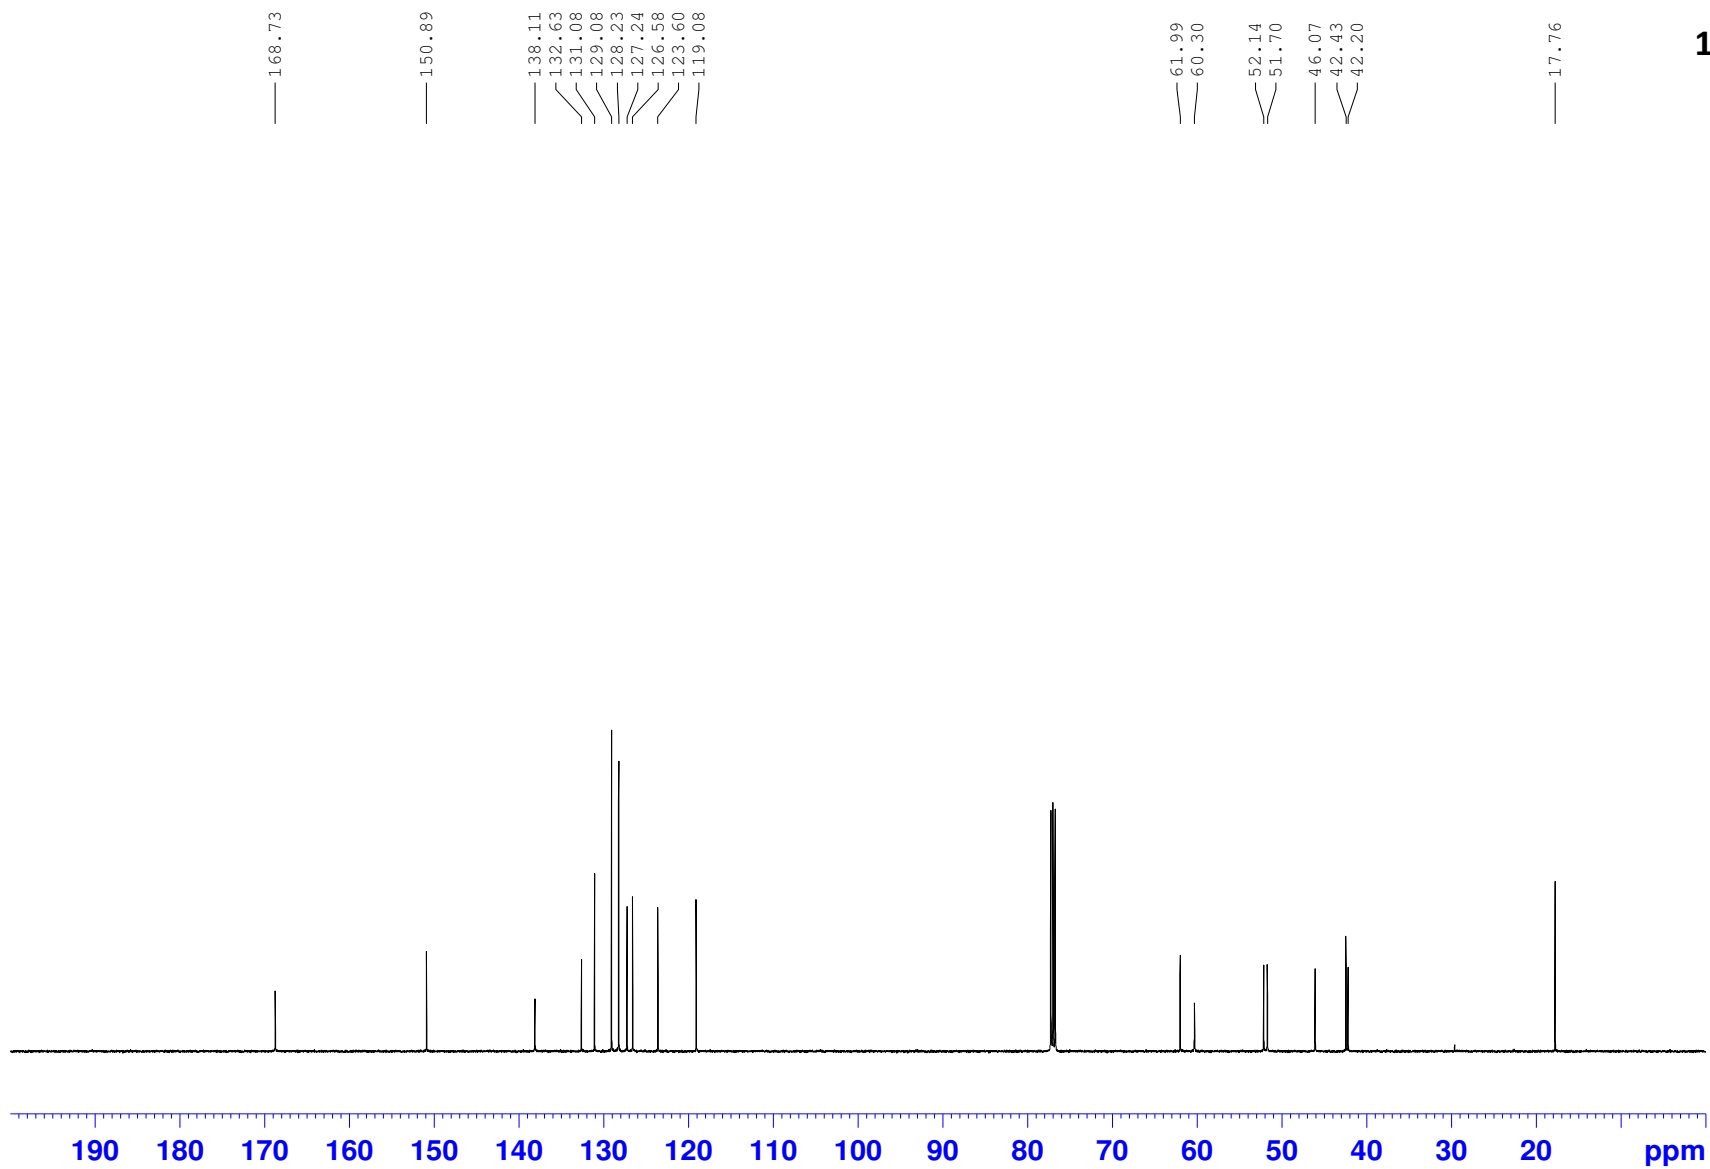

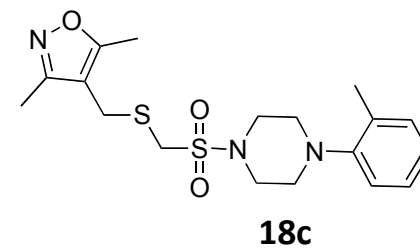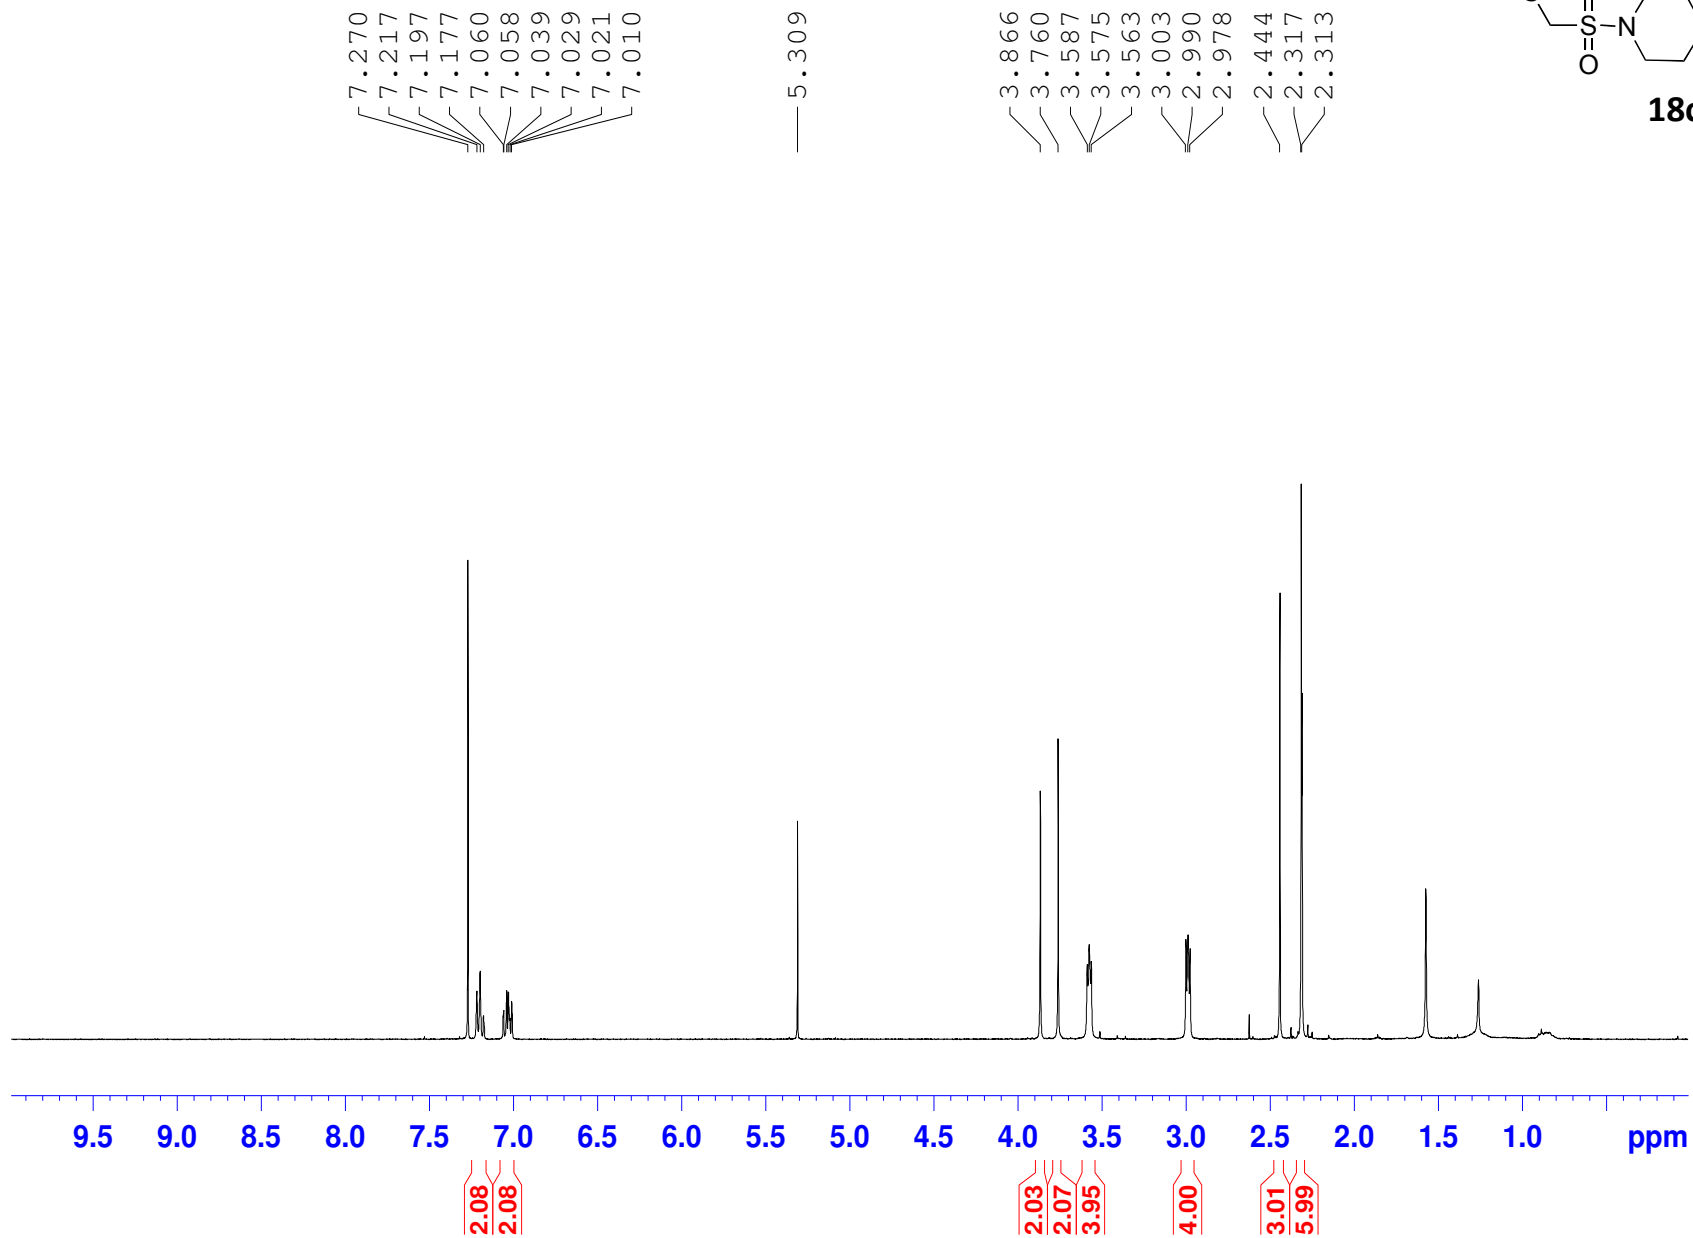

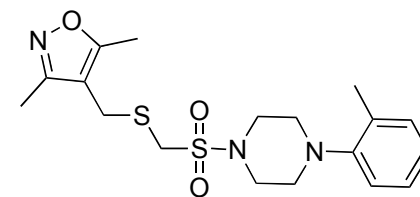**18c**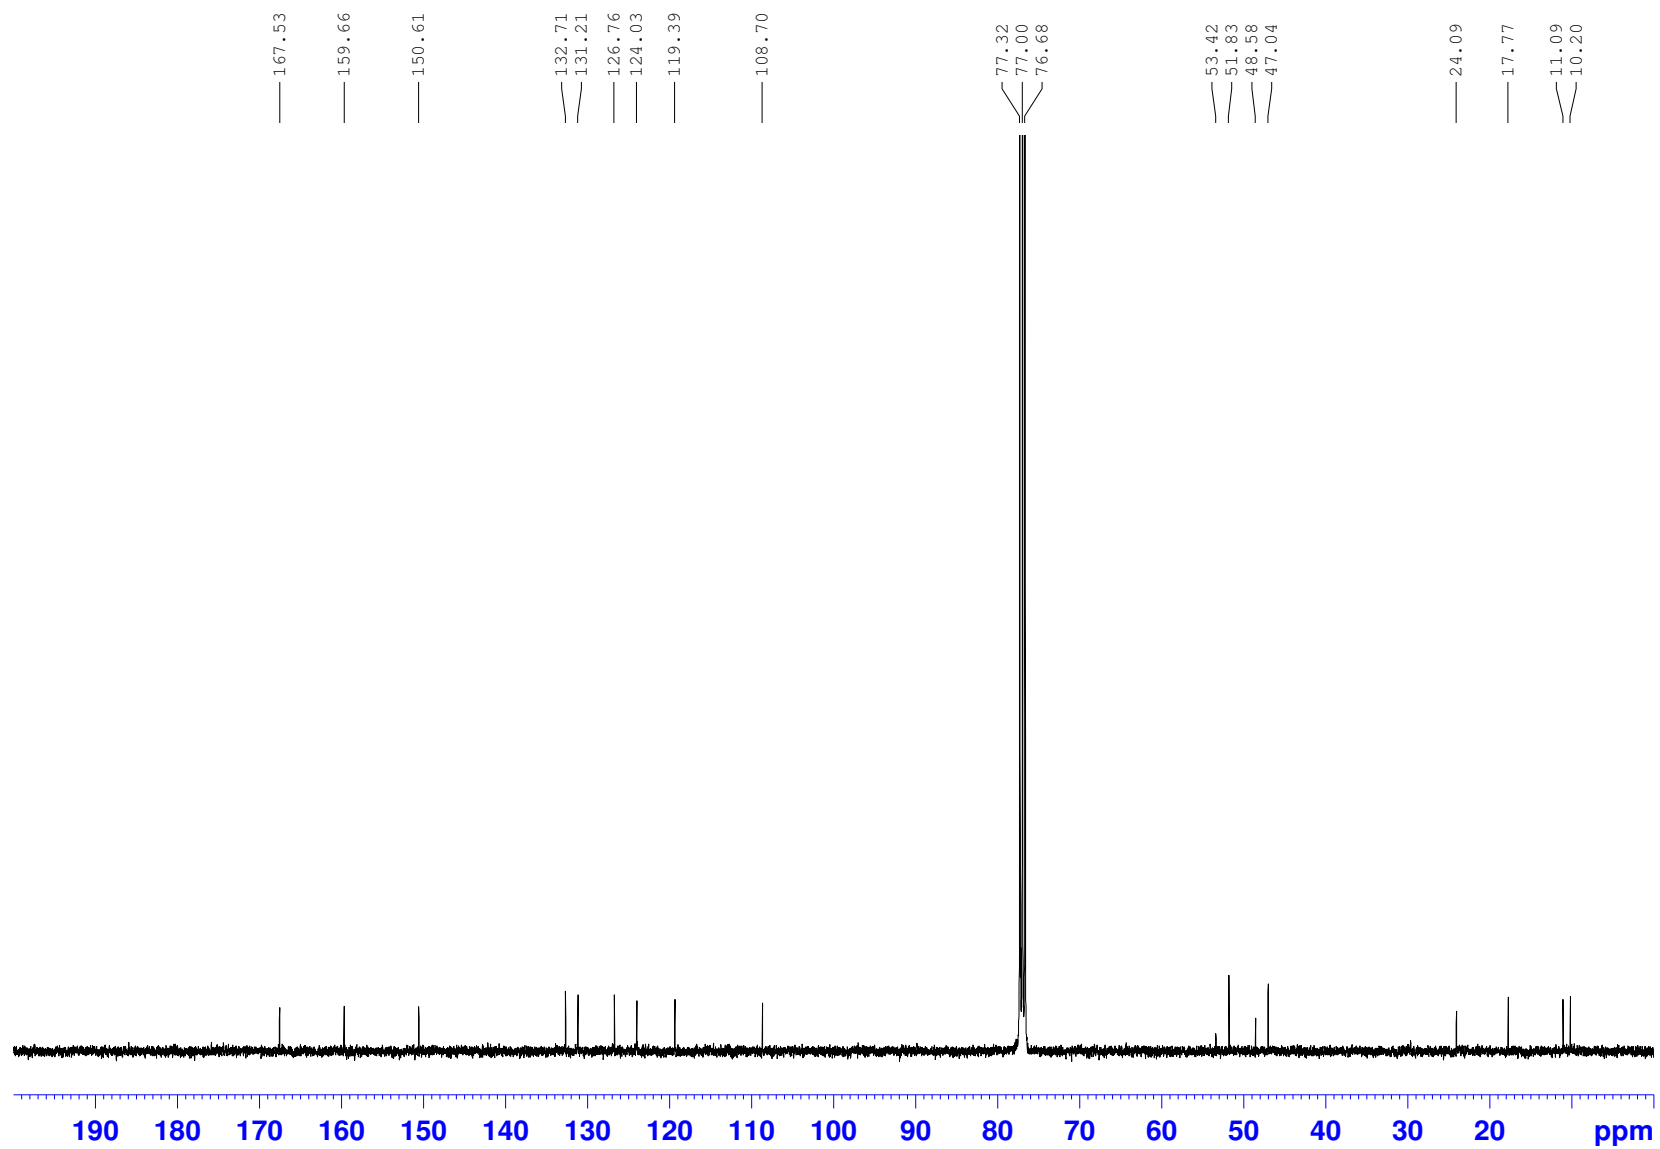

S103

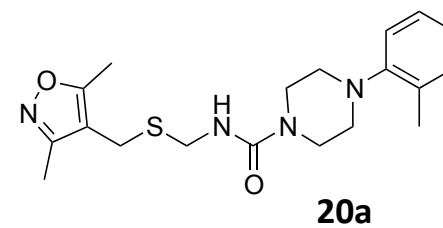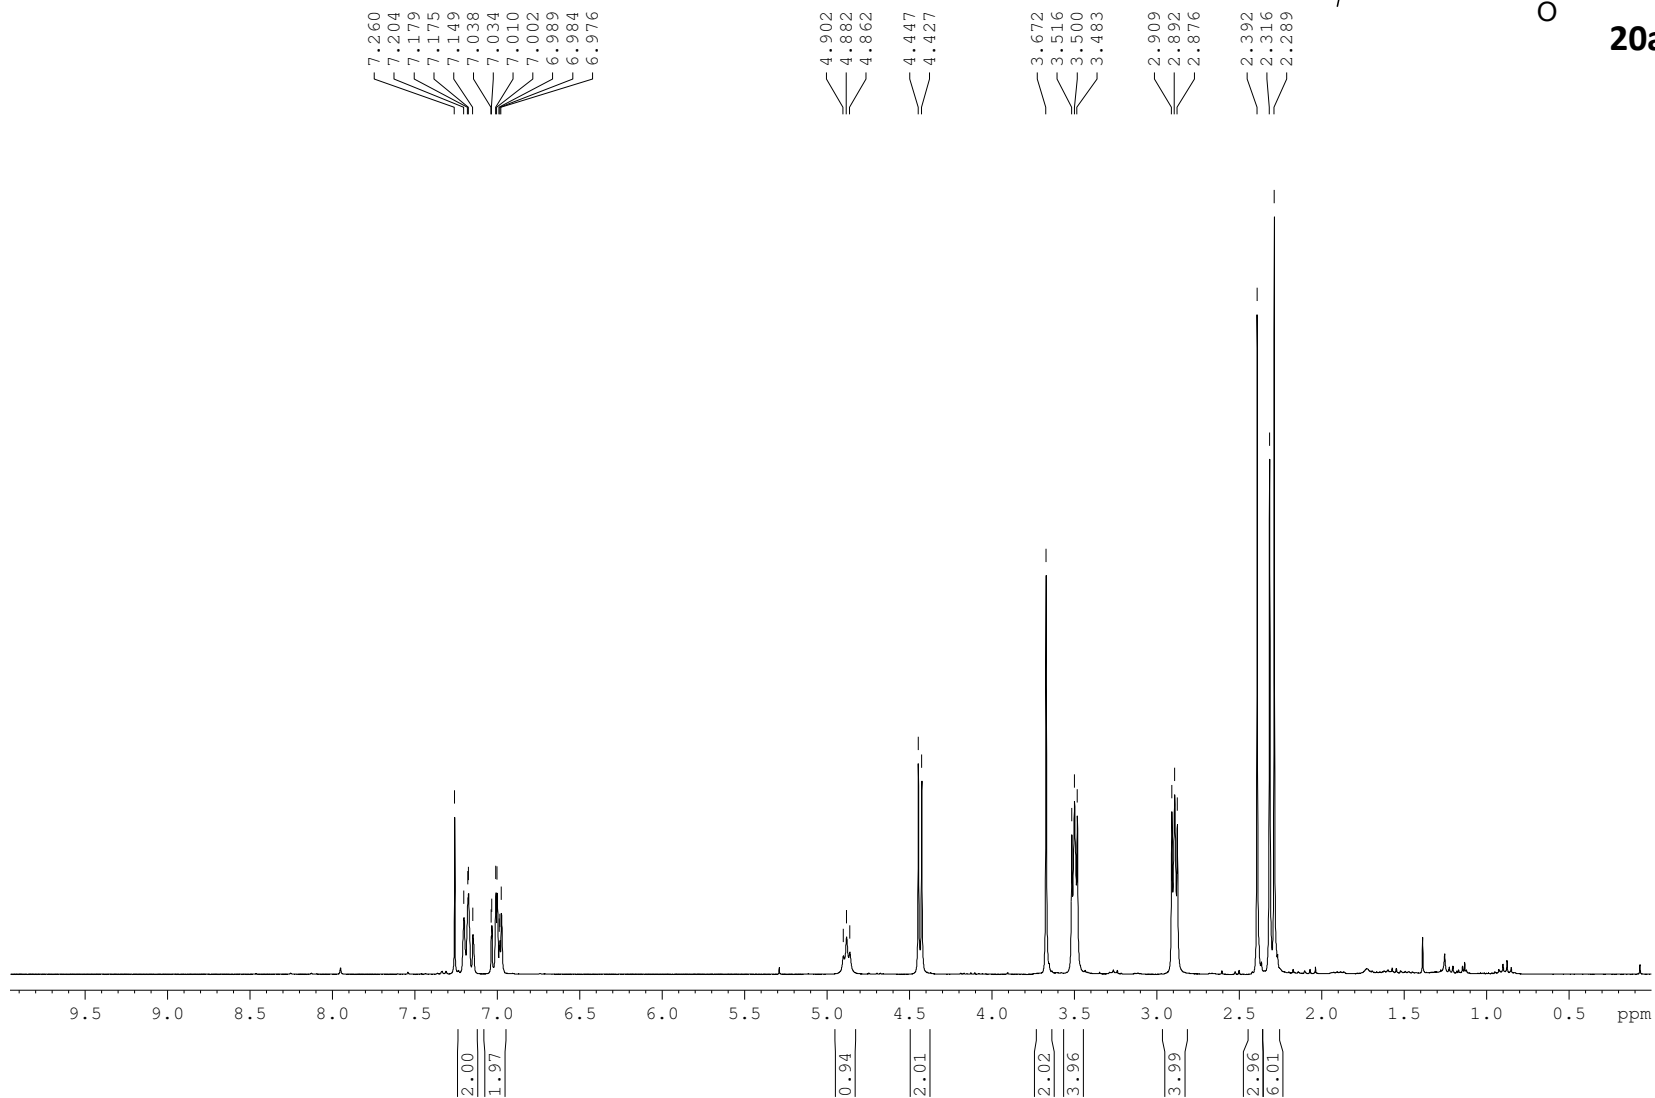

S104

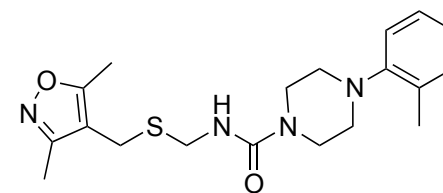**20a**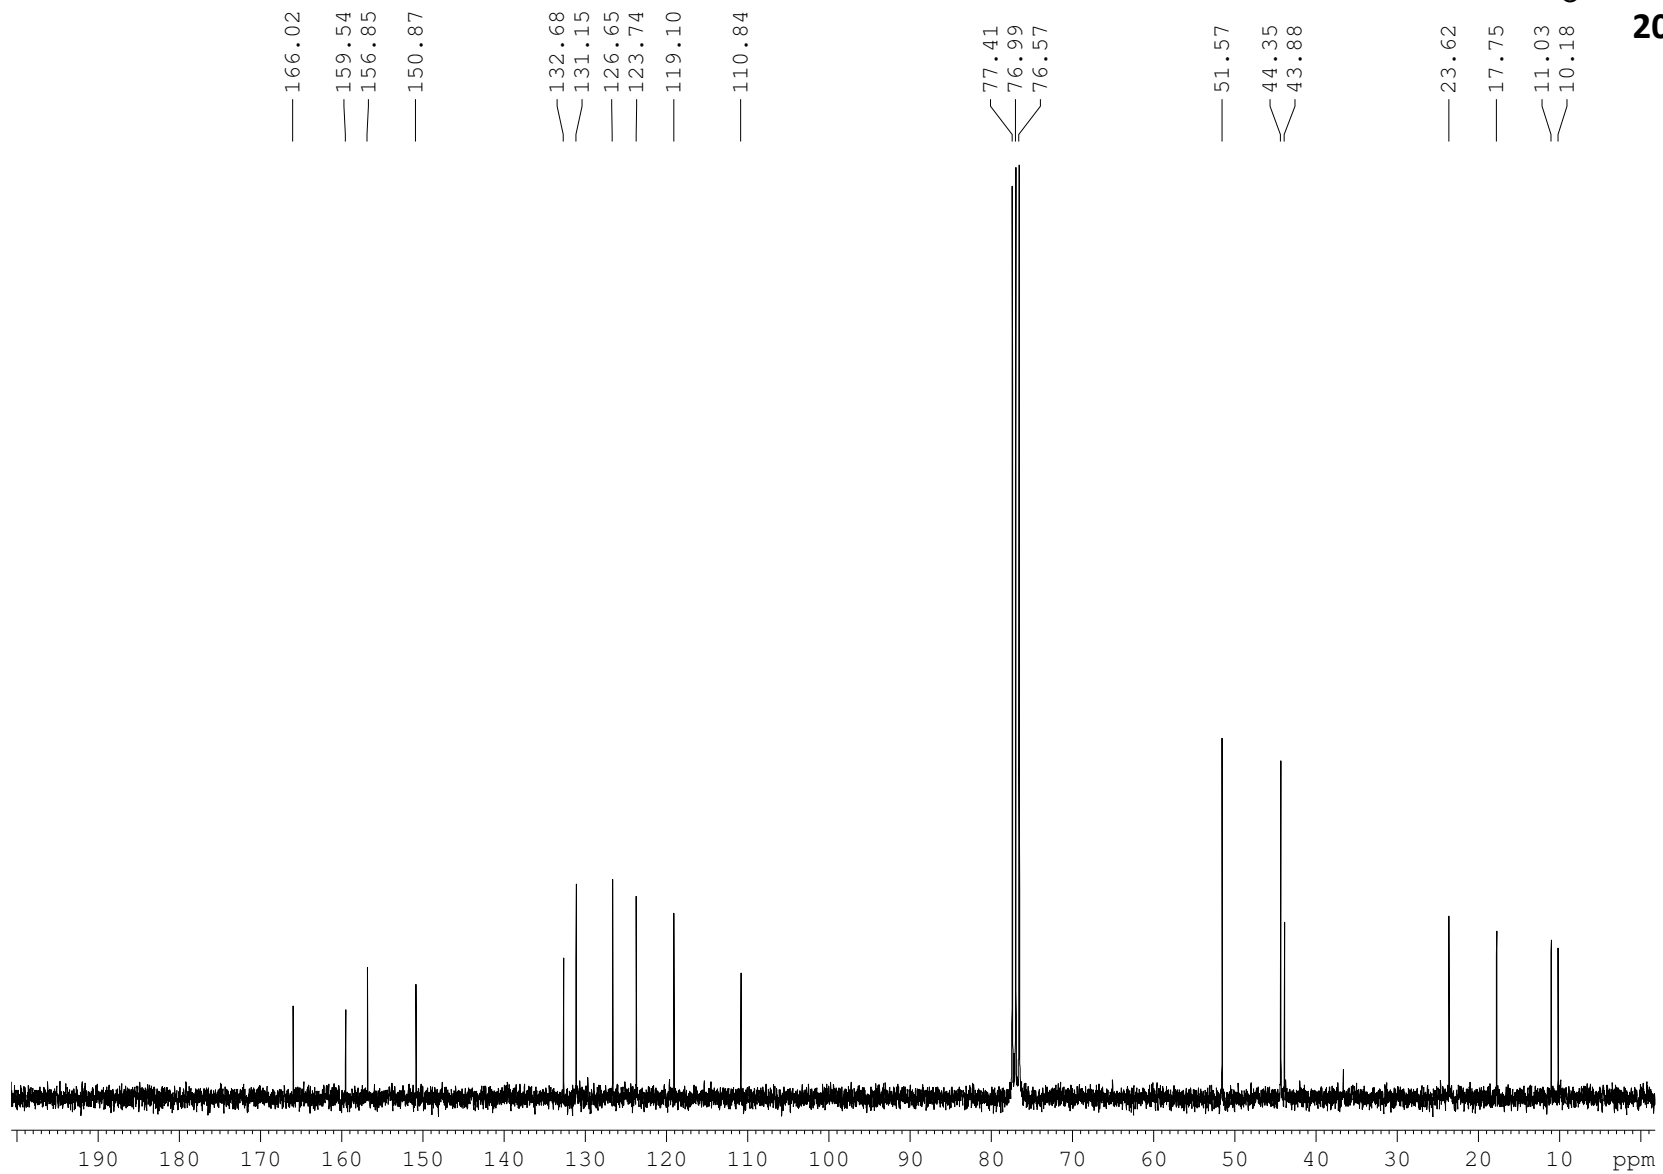



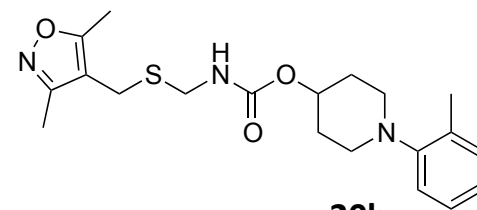**20b**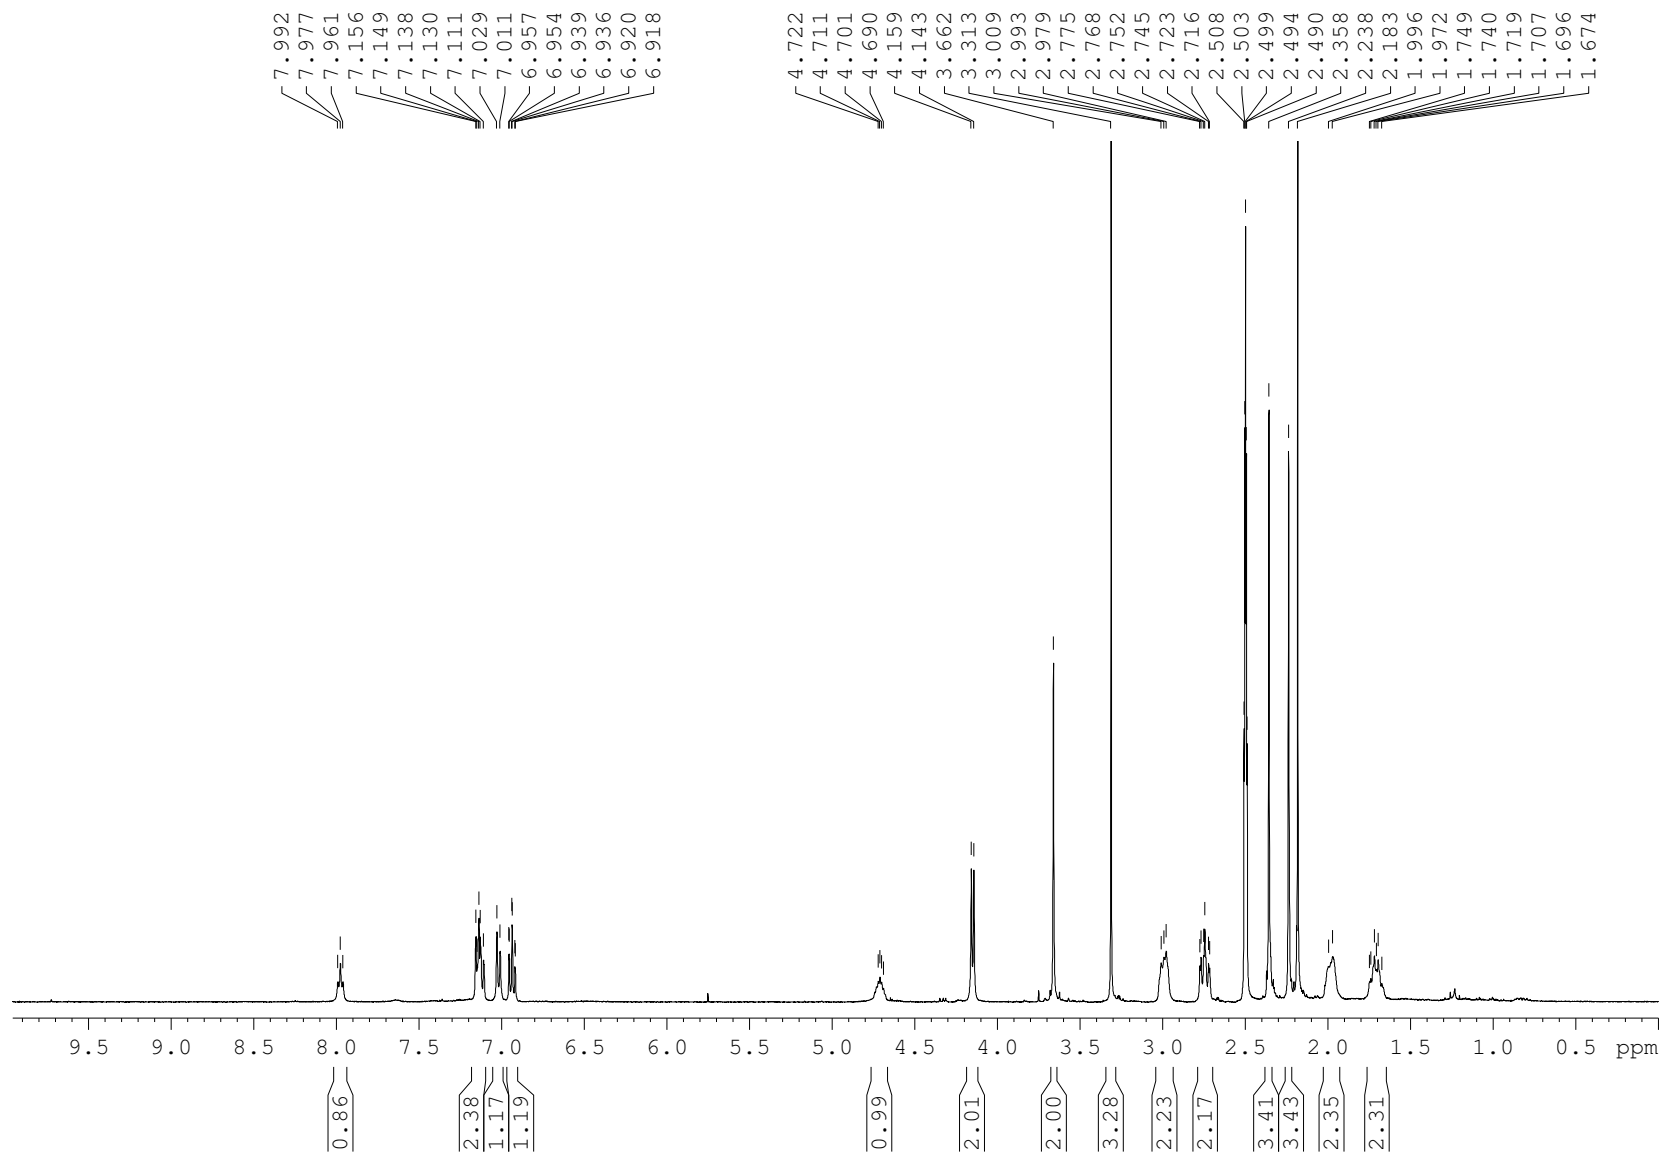

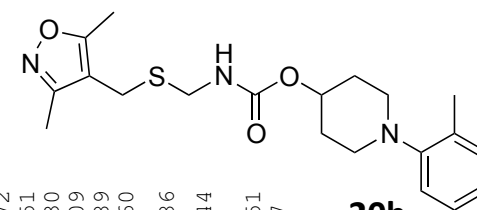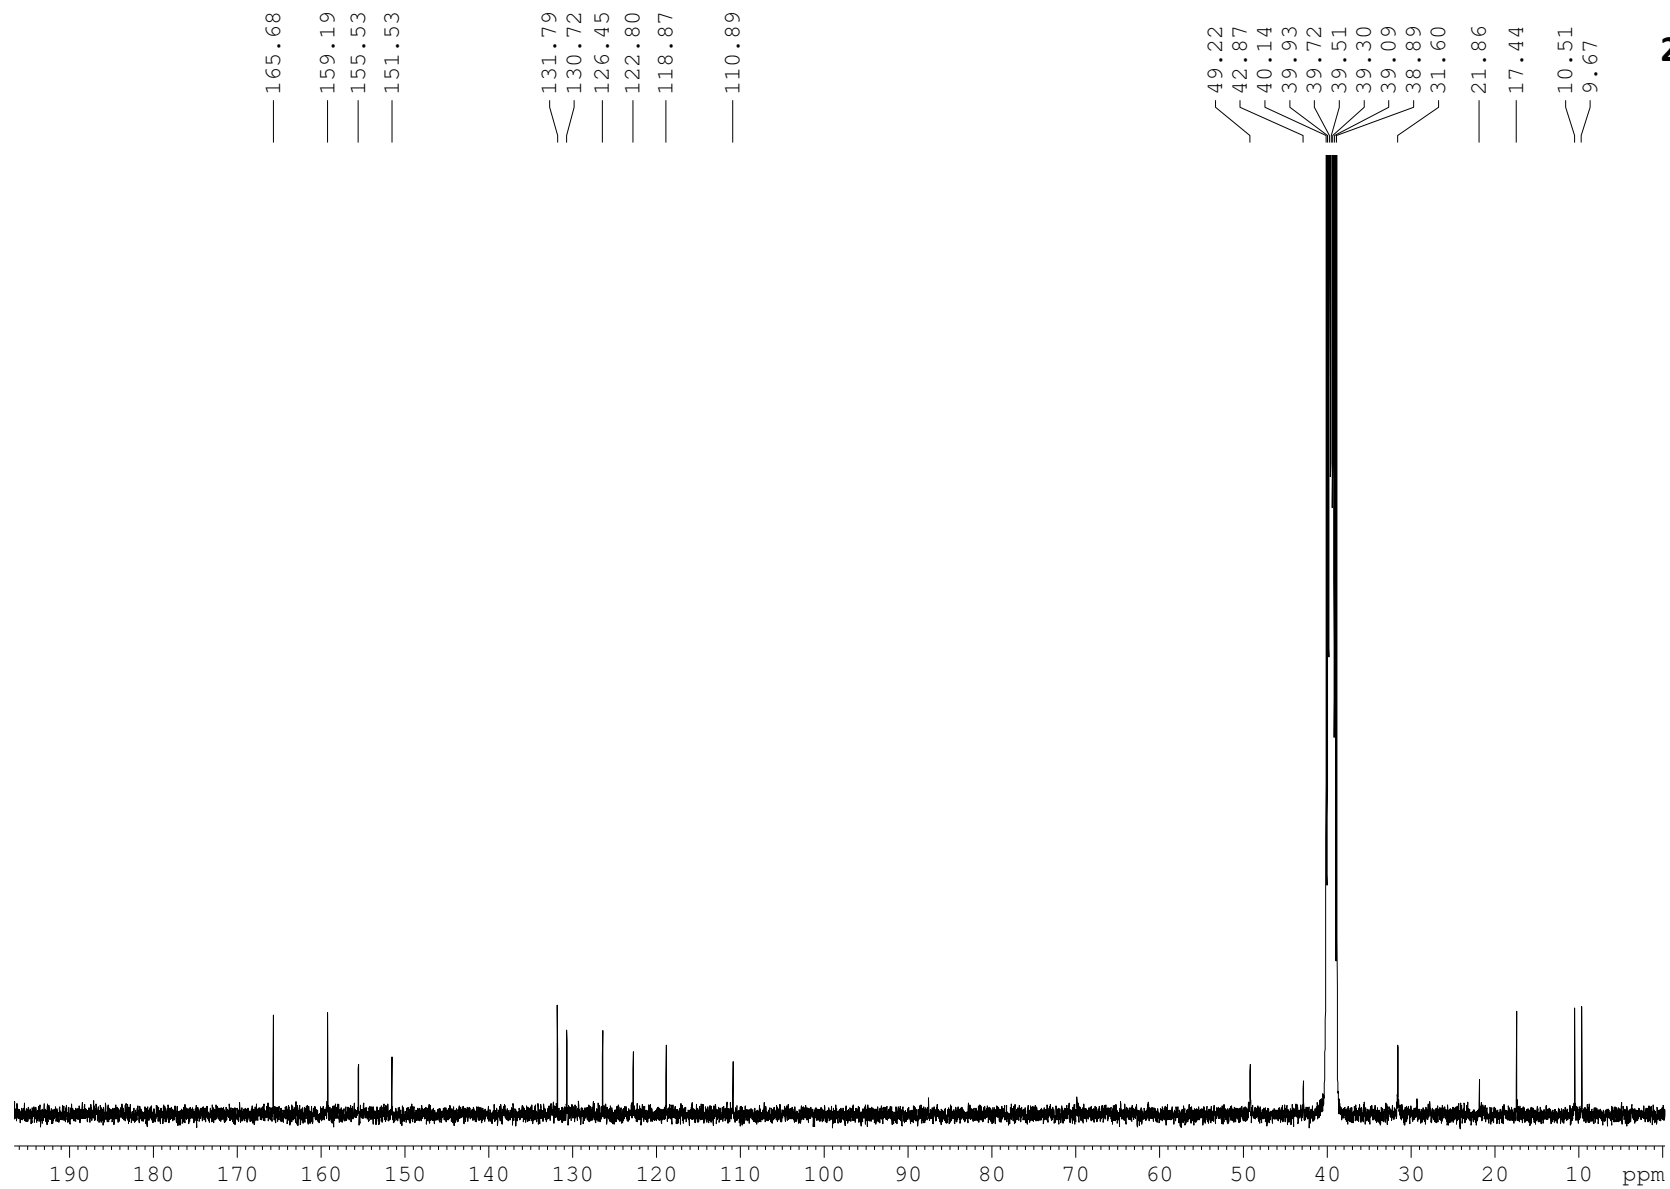

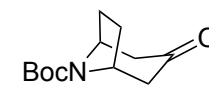**21a**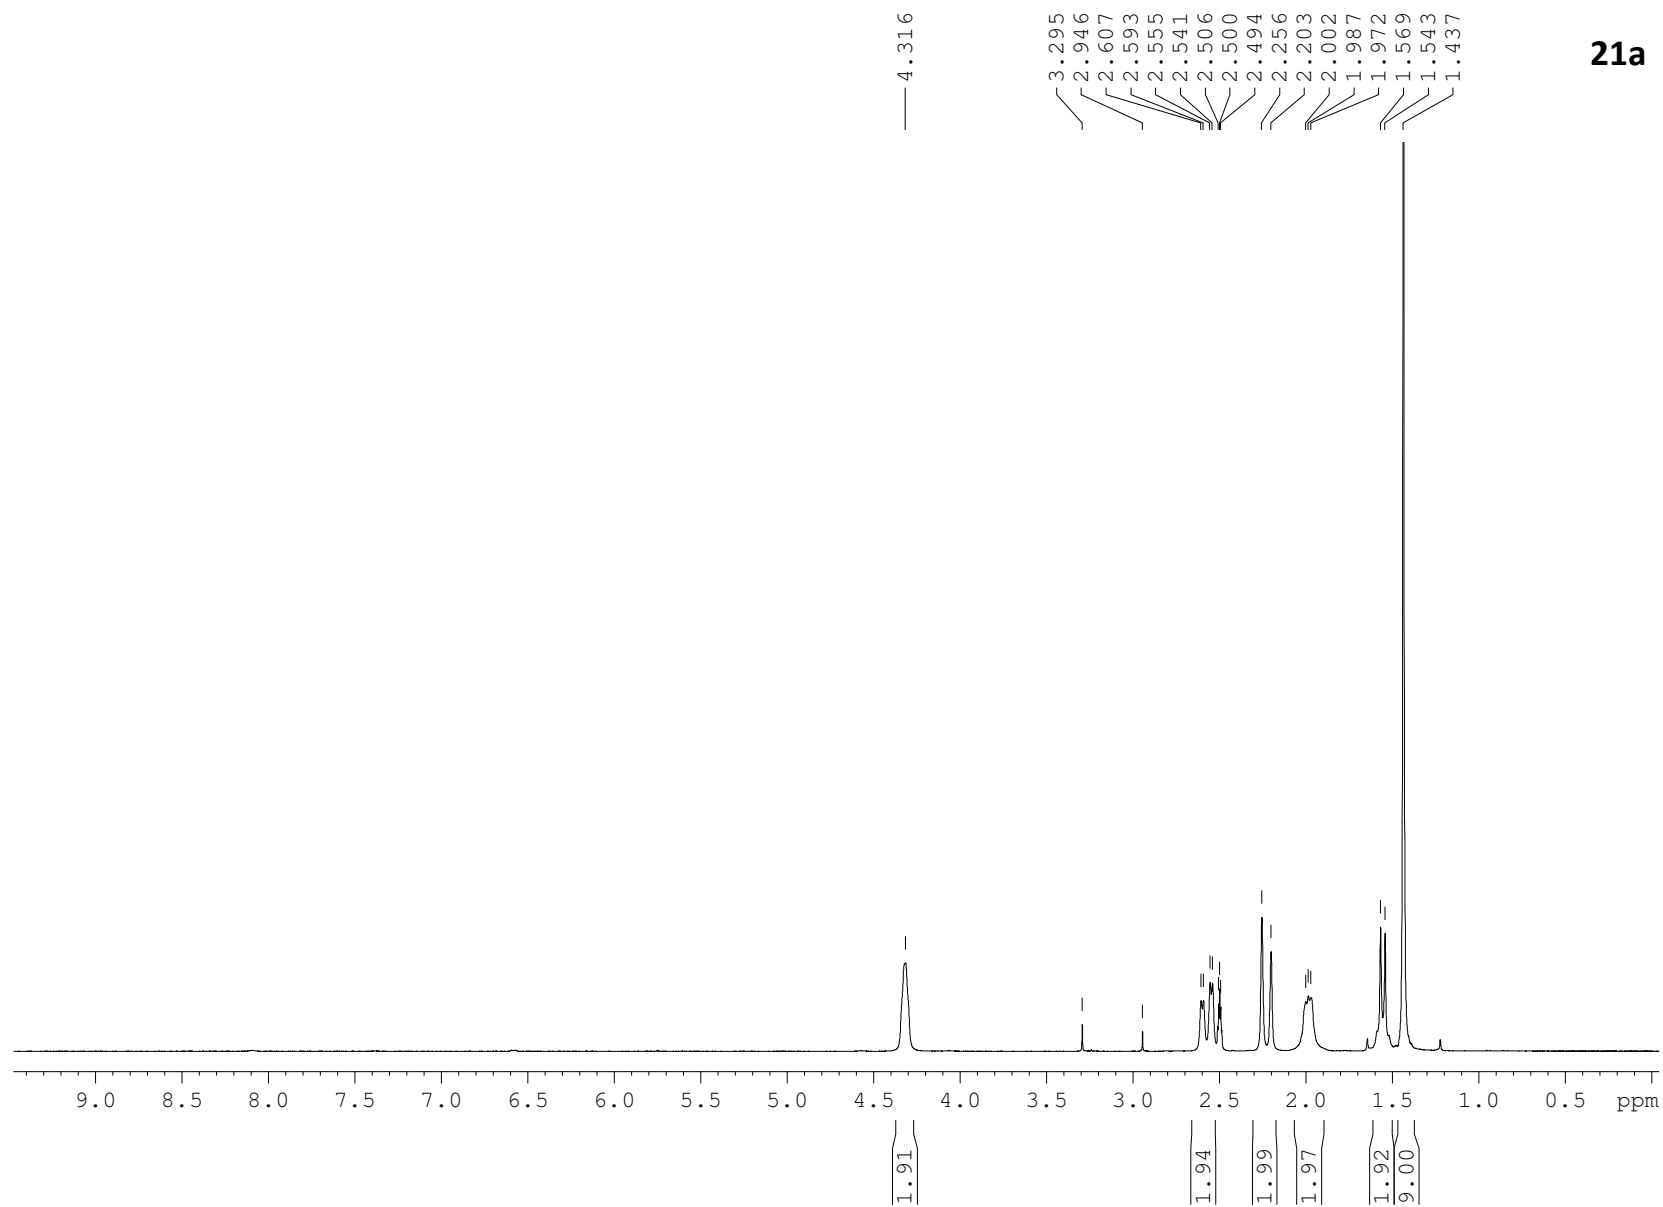

S108

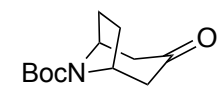

**21a**

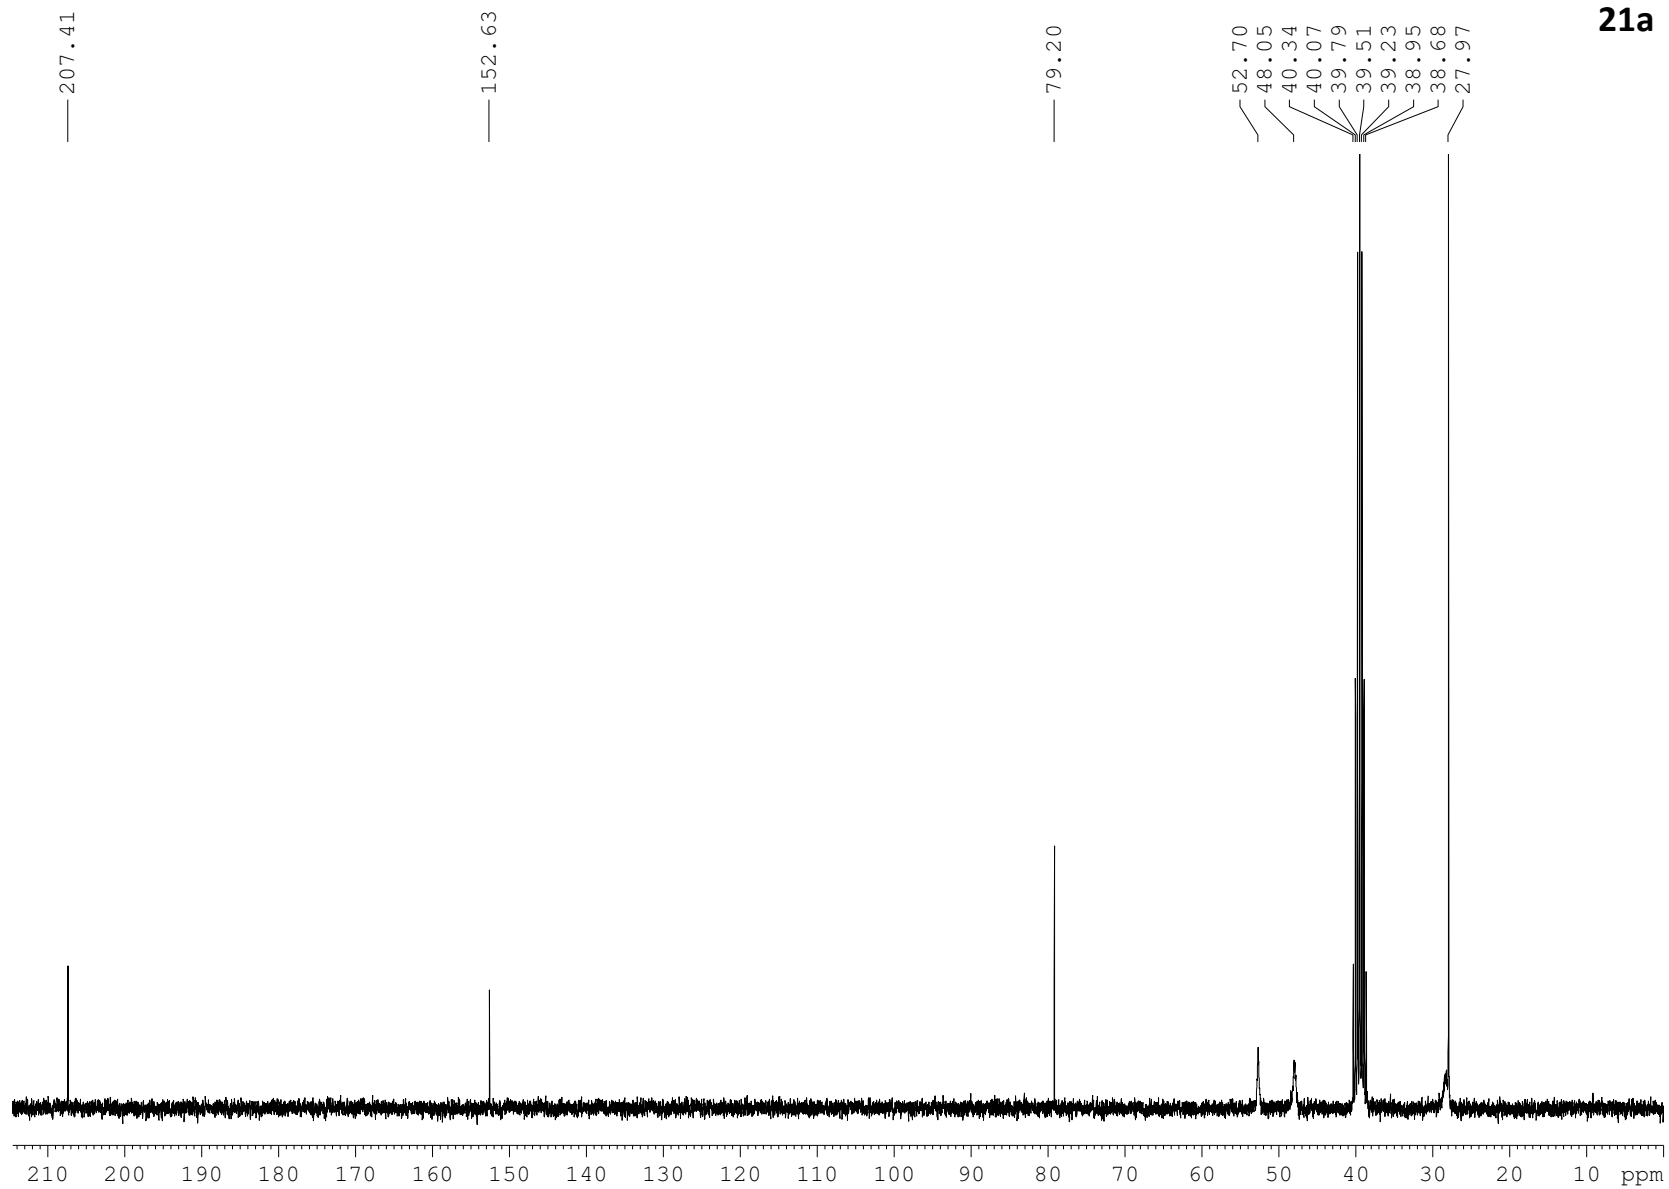

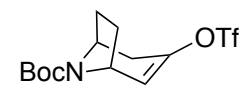**22**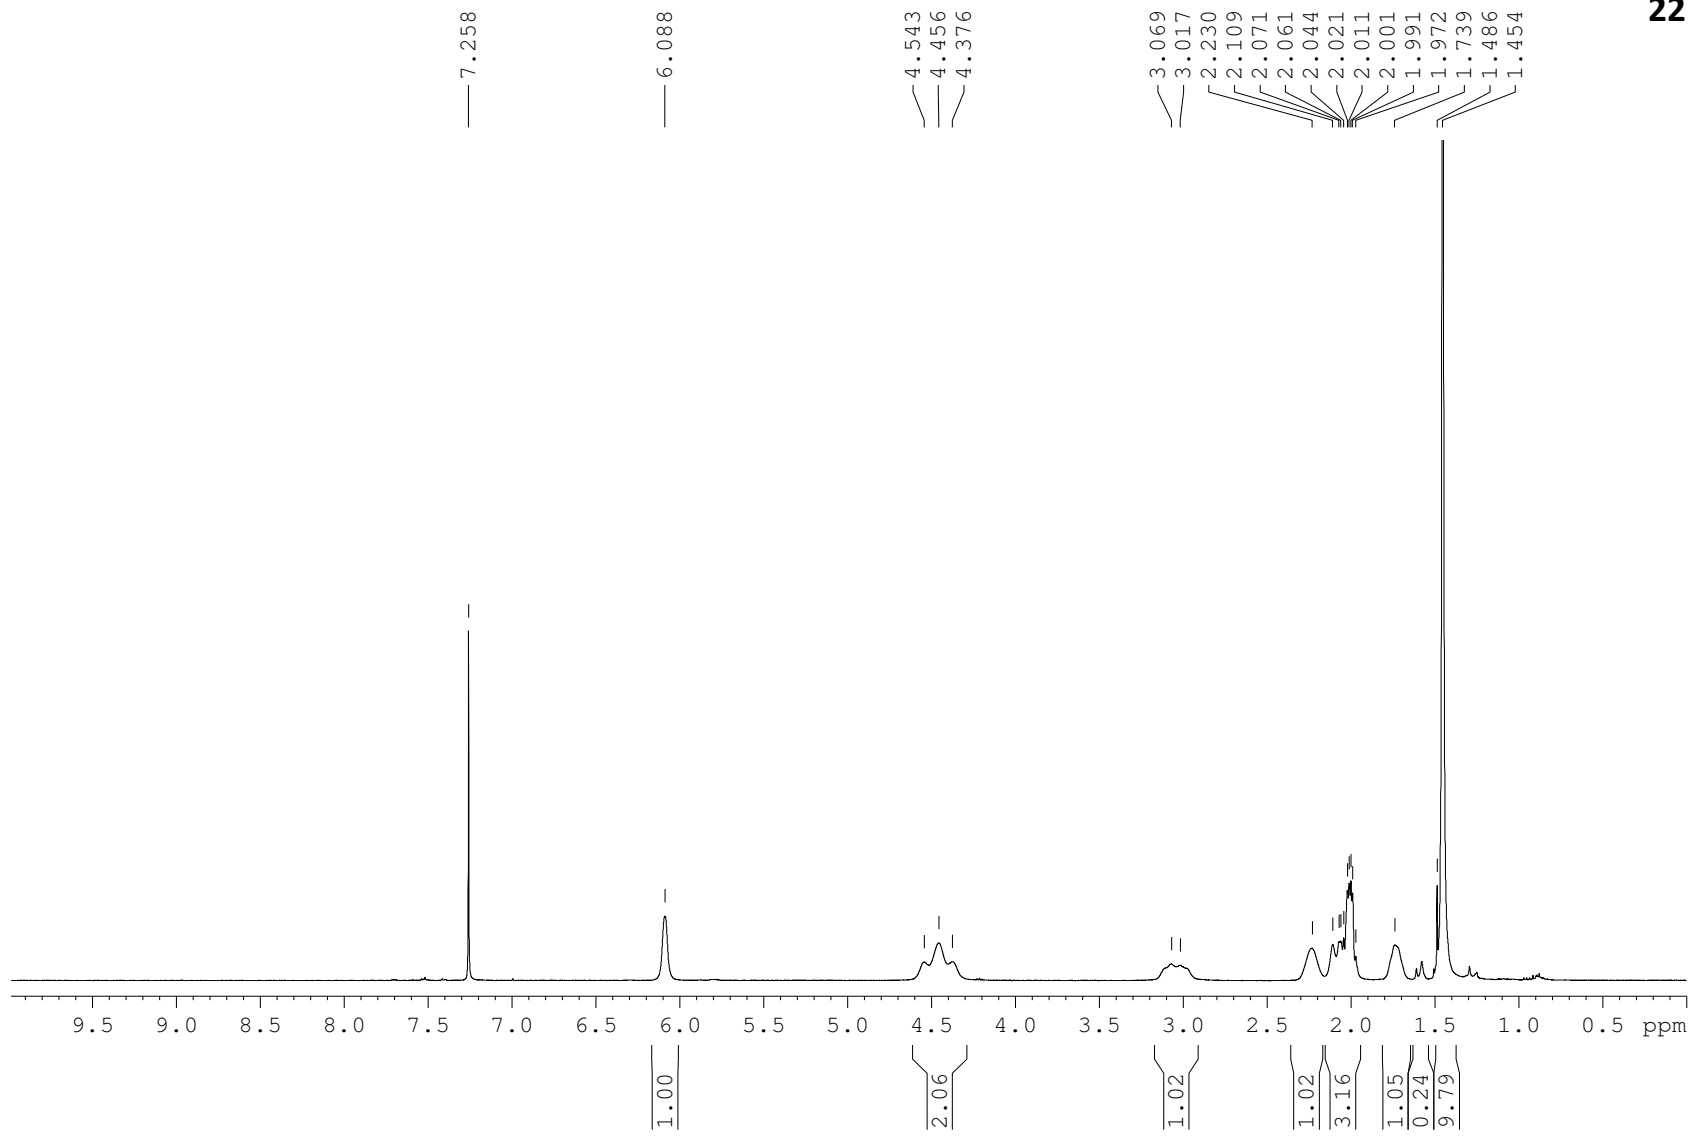

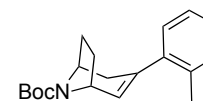**23a**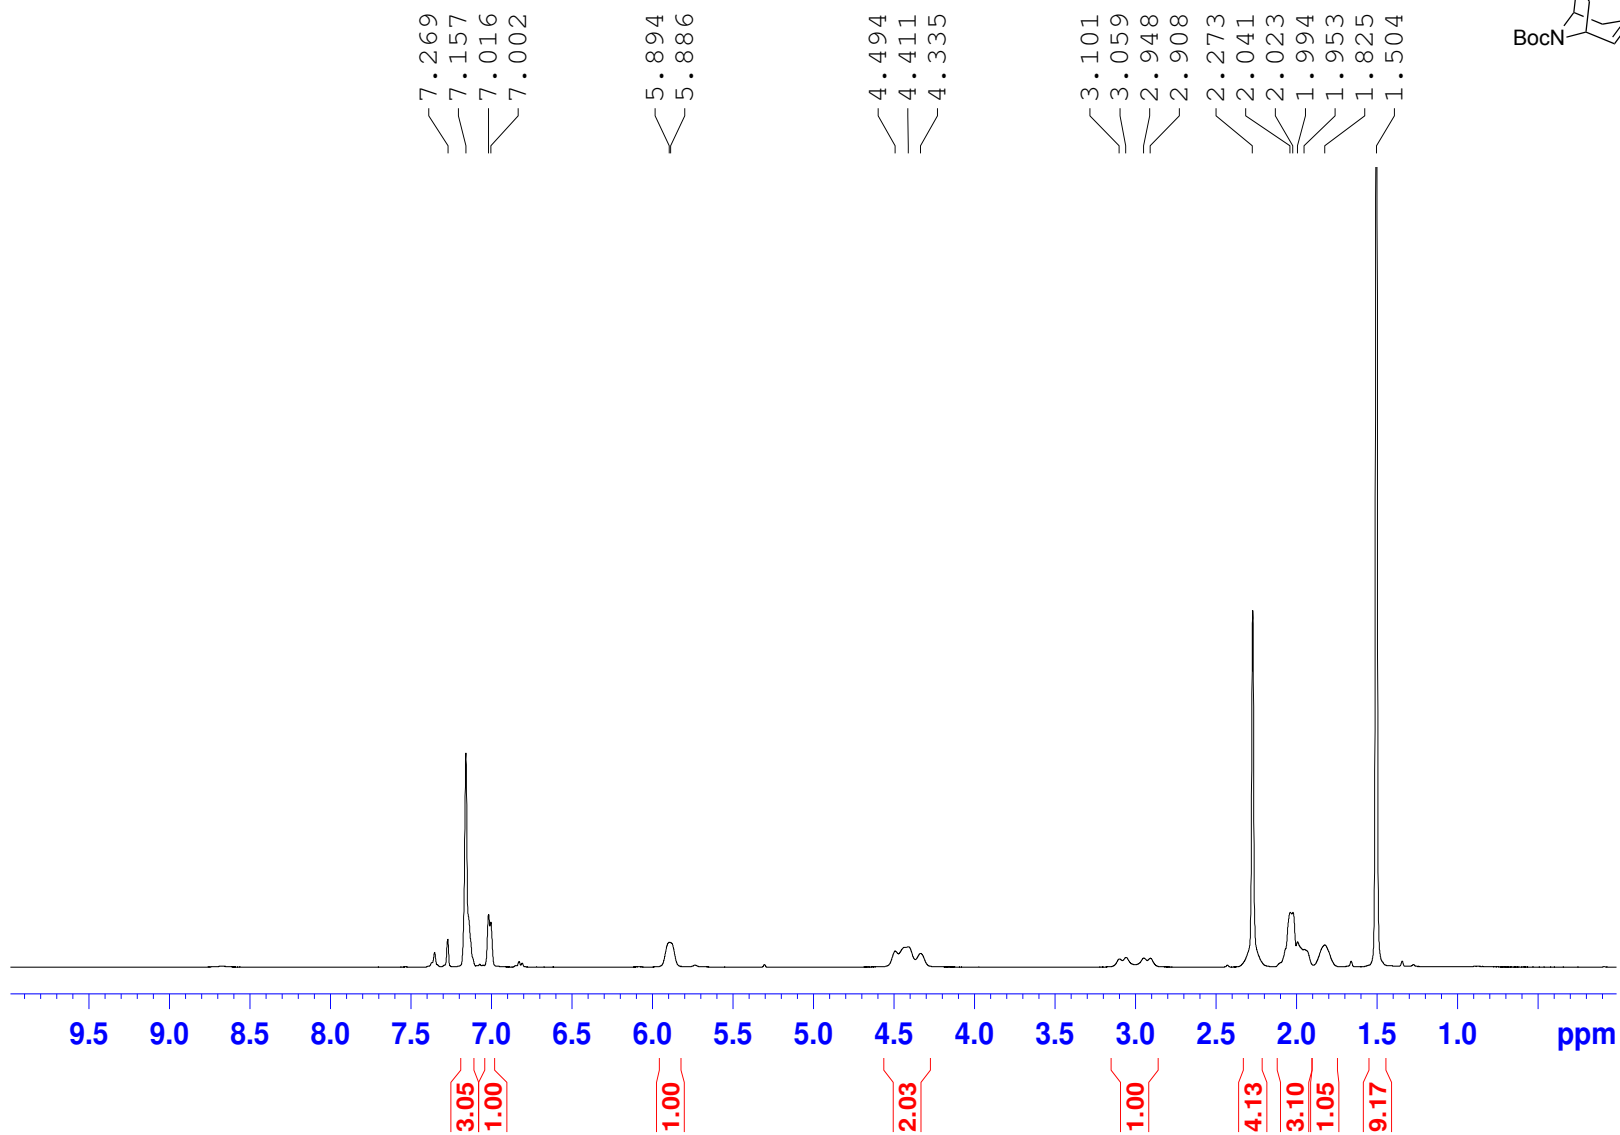

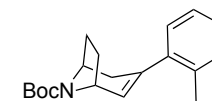**23a**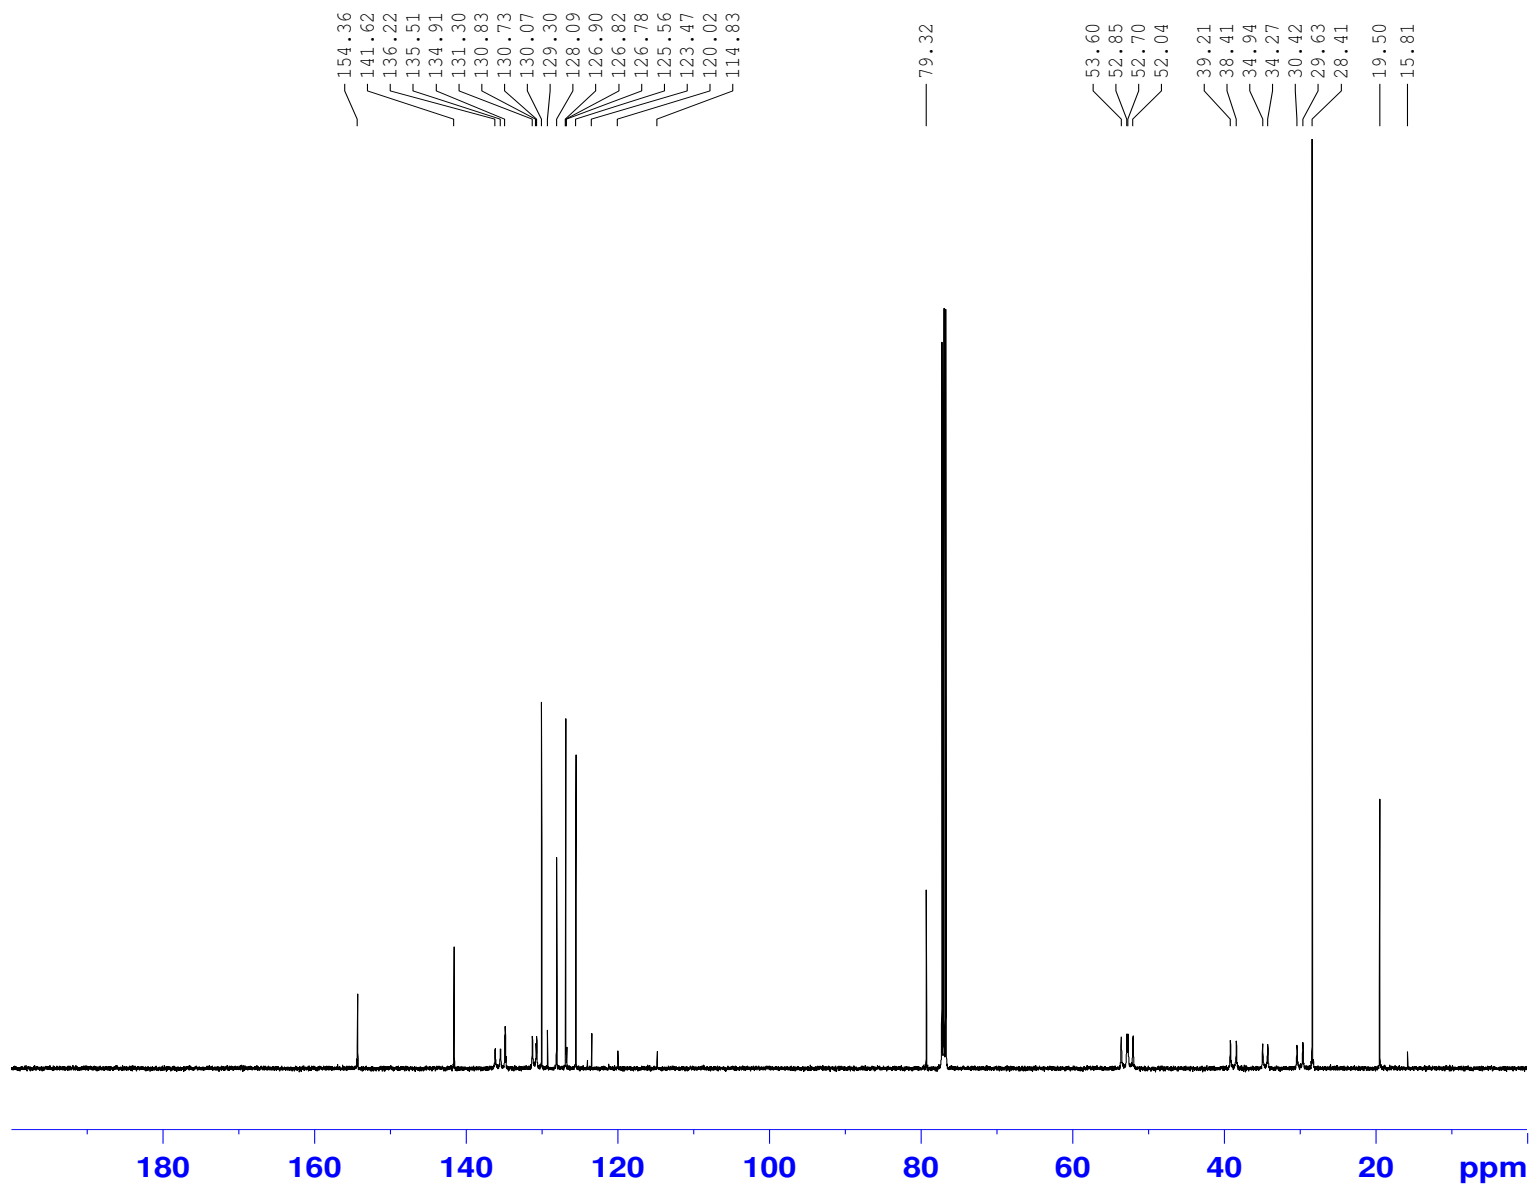

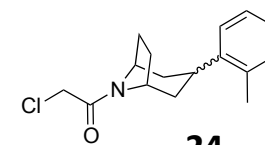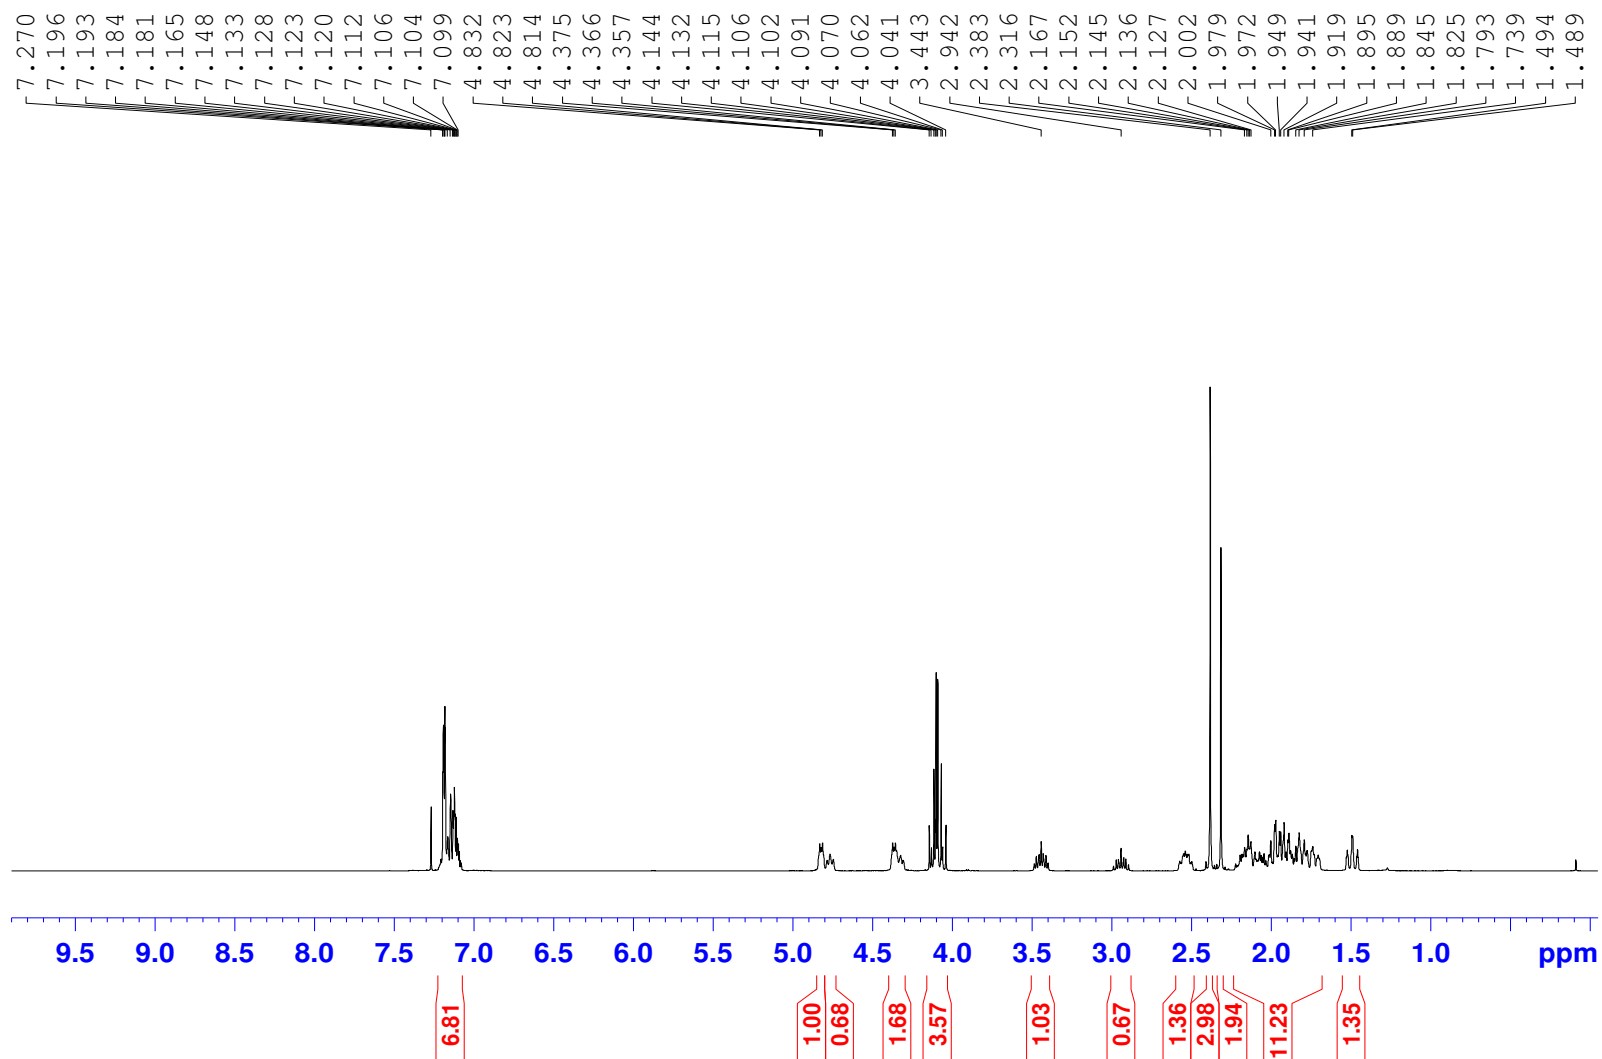



S113

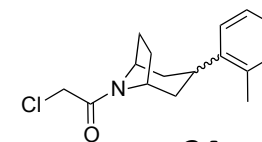

**24**

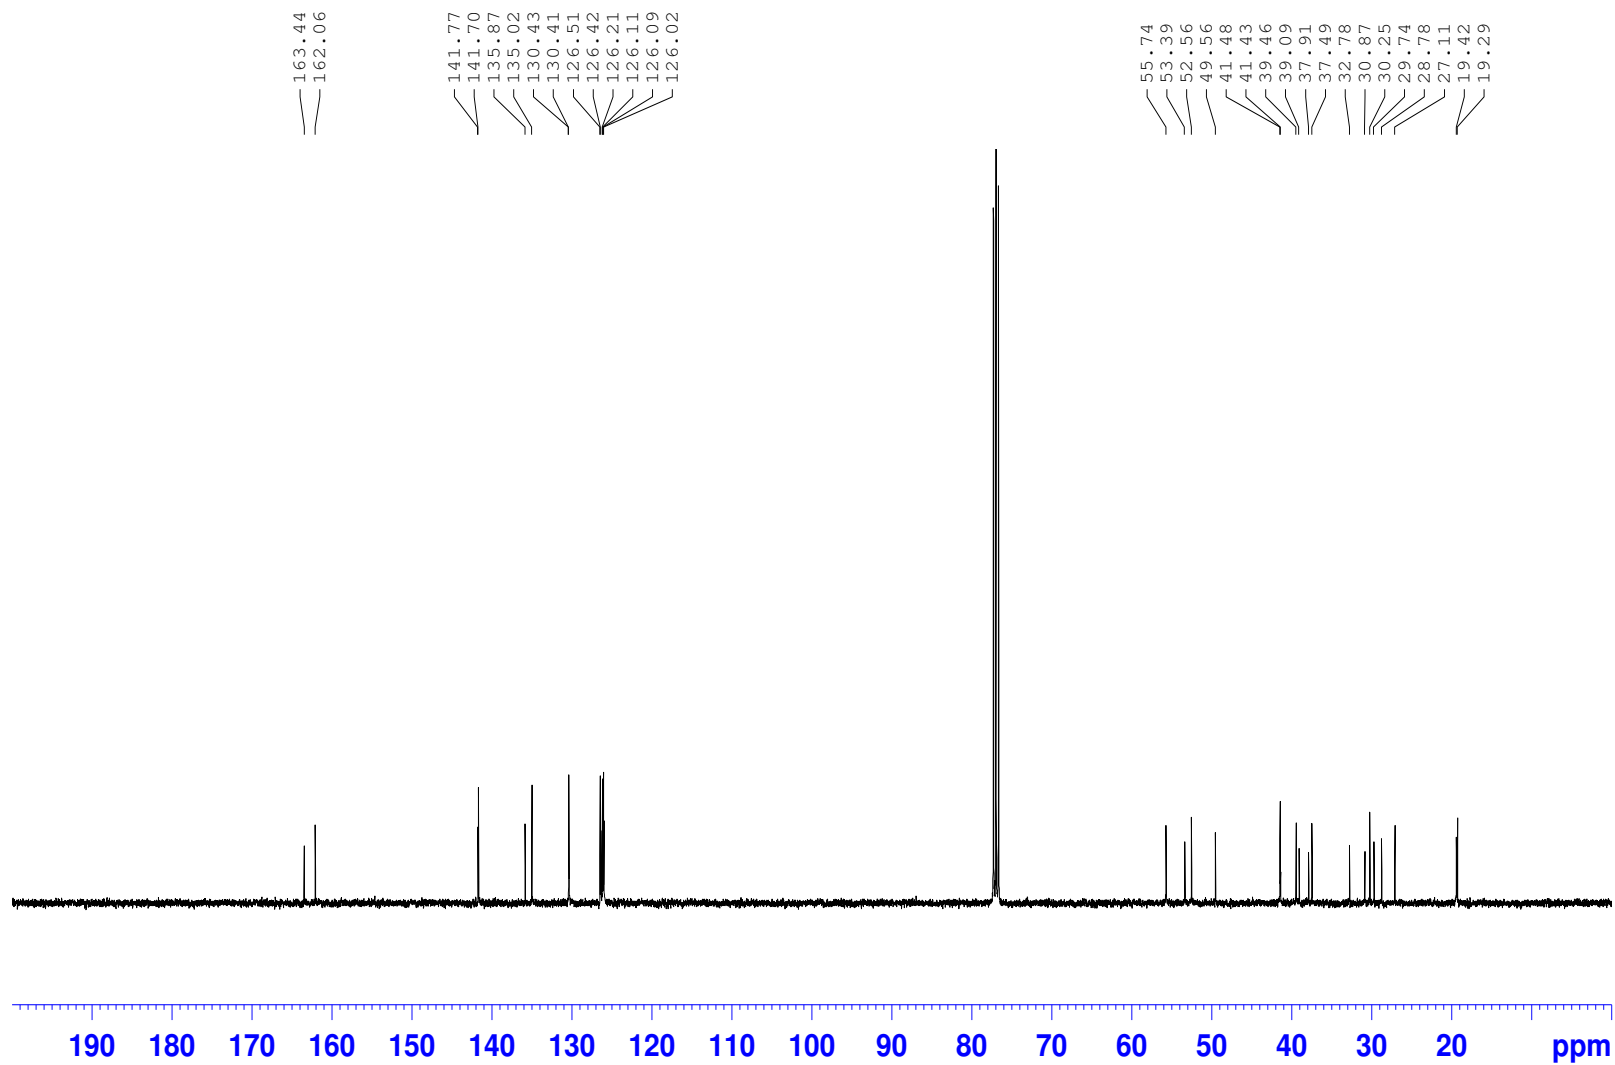

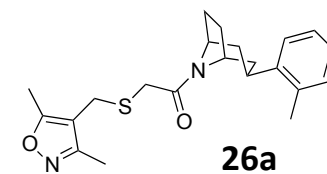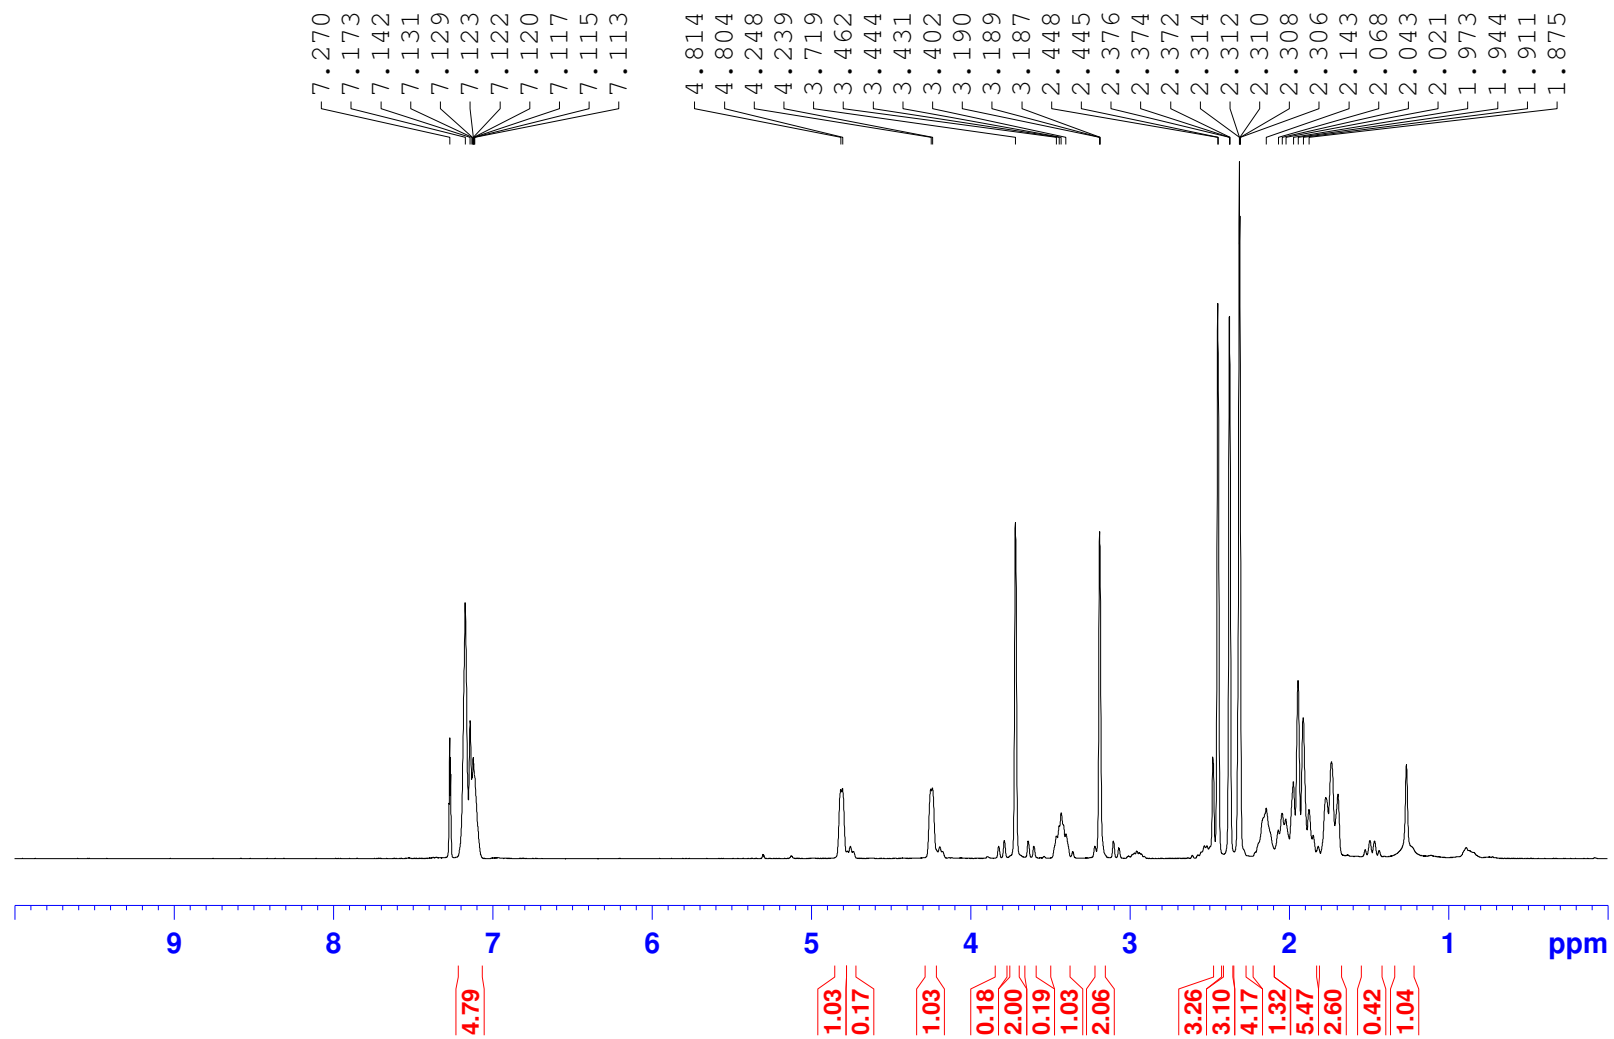

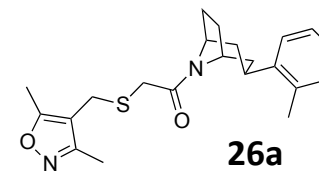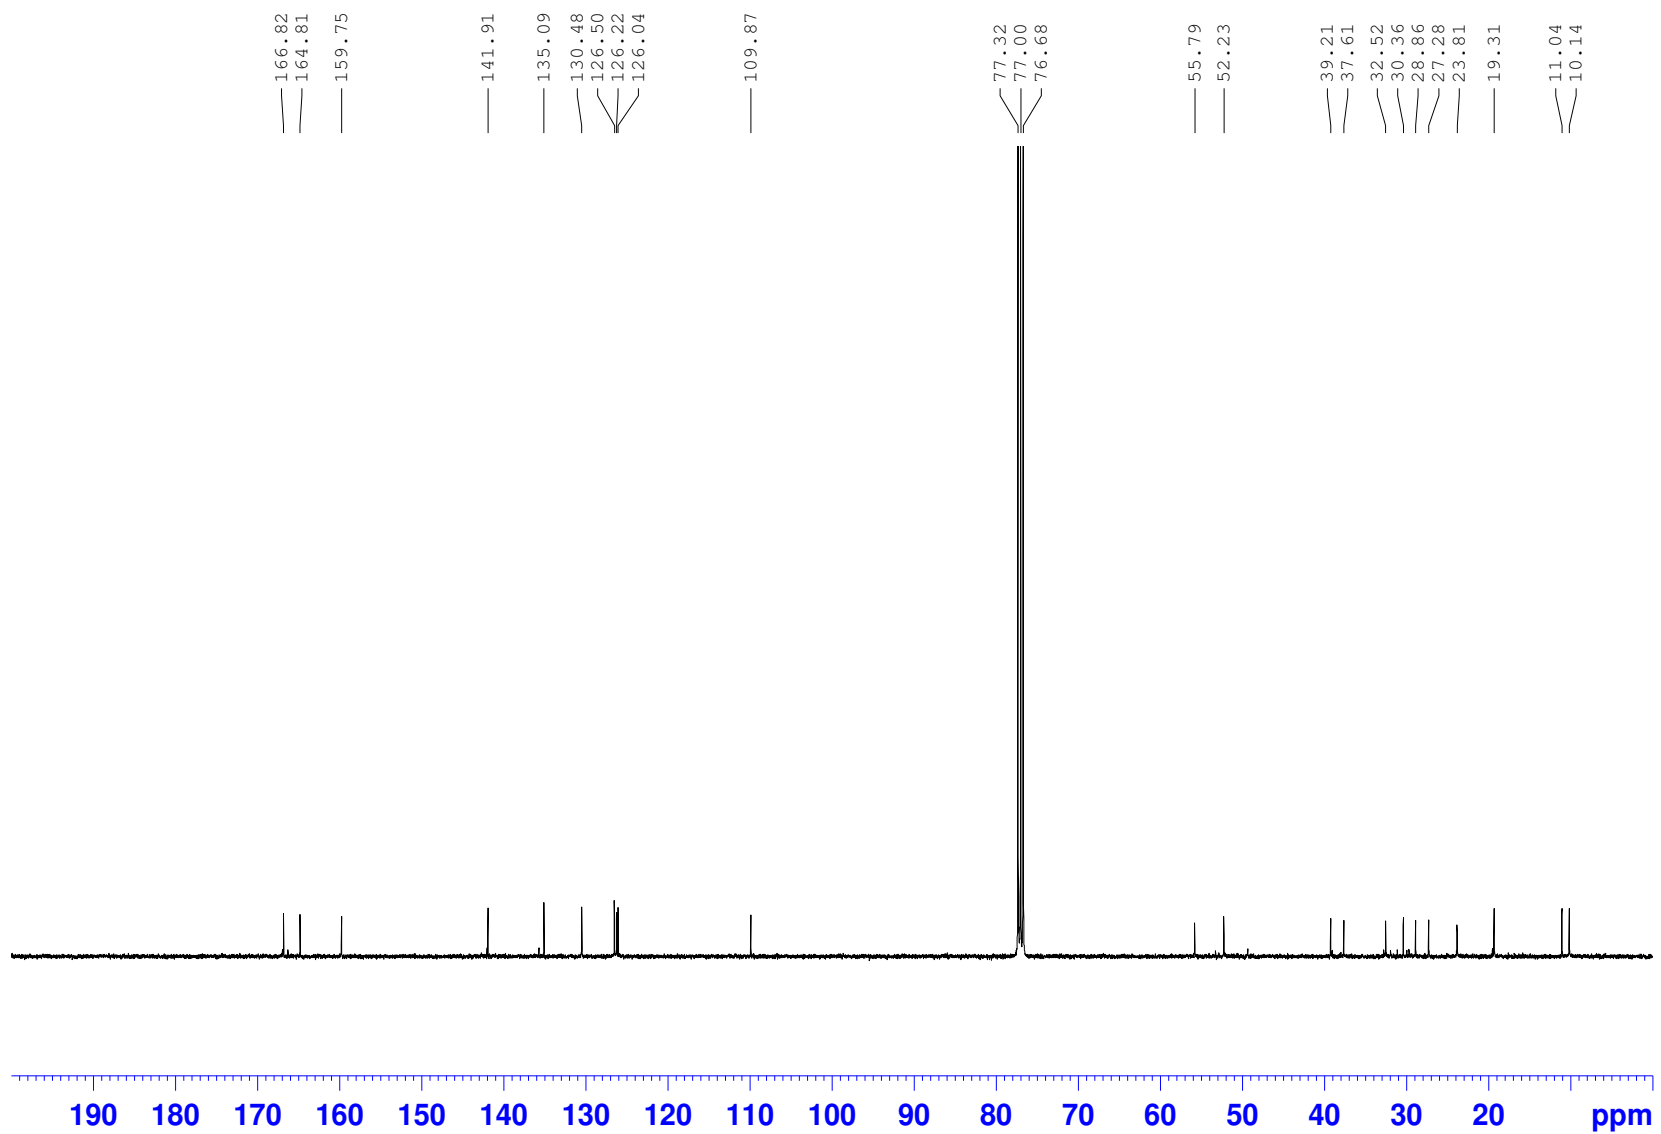

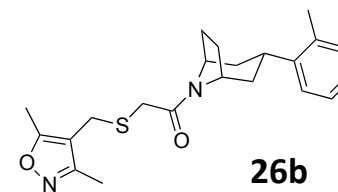

26b

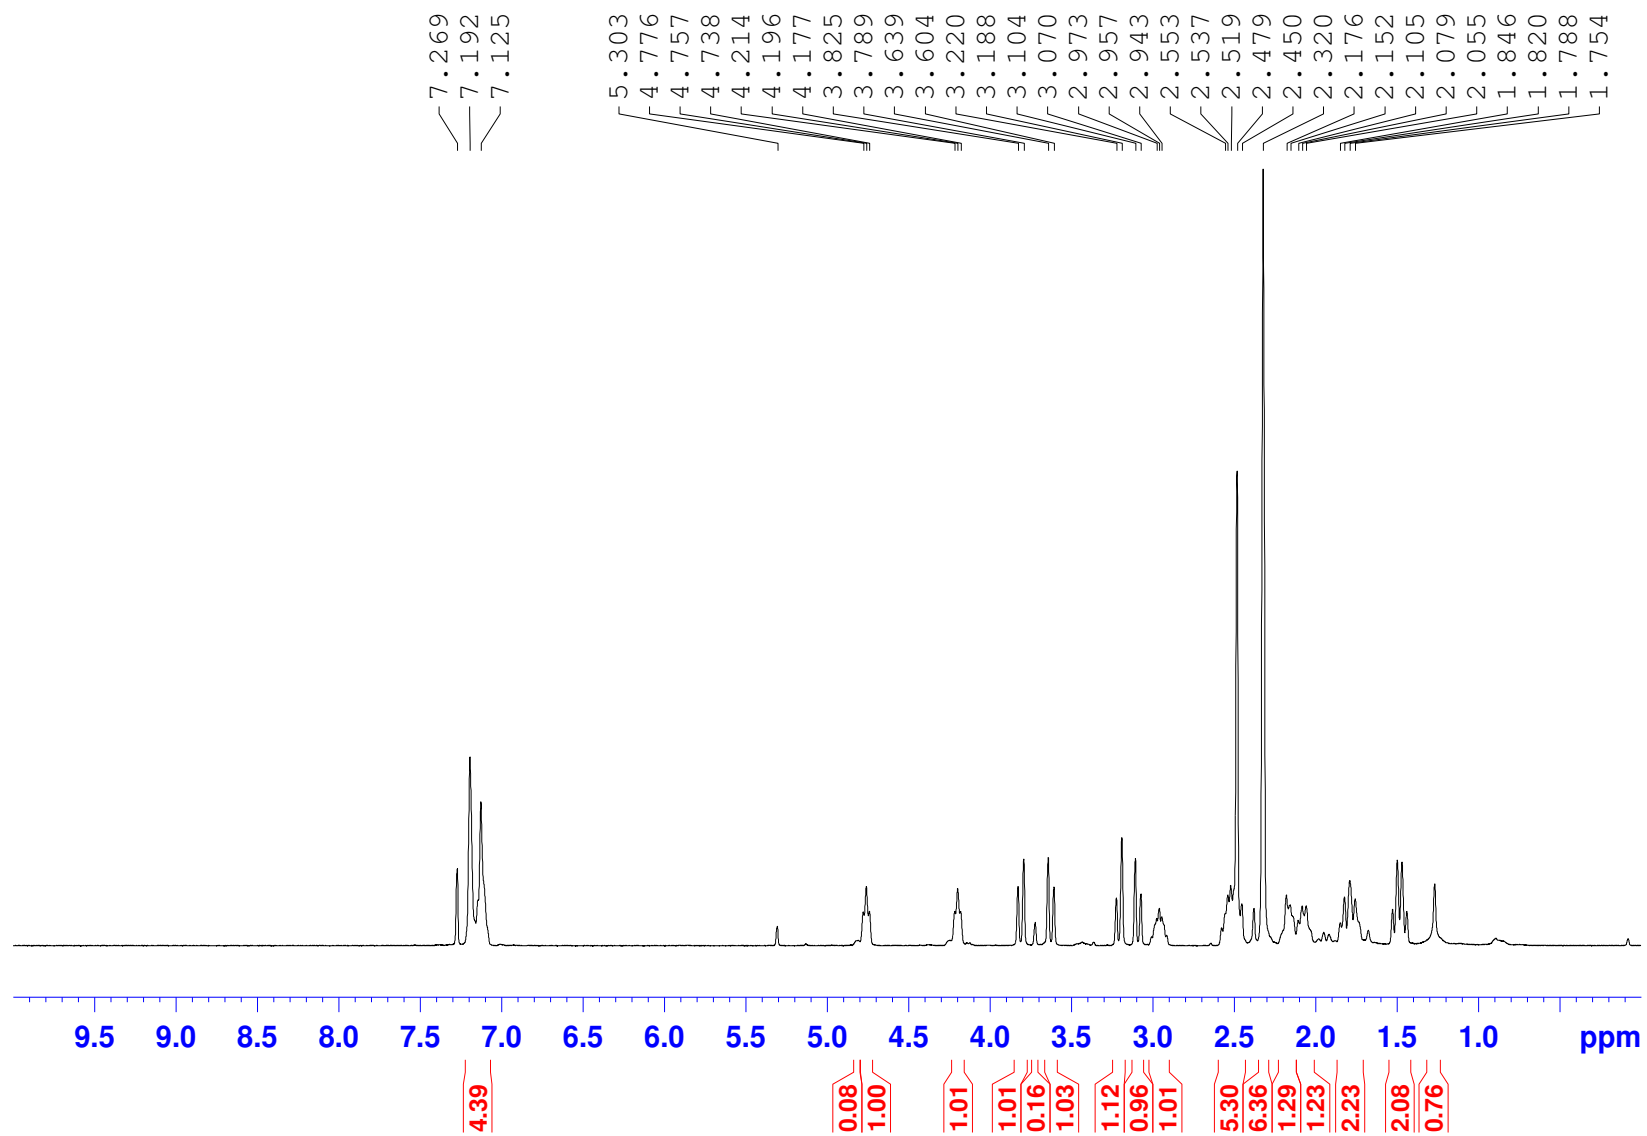

S117

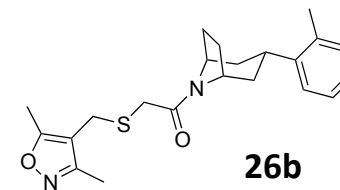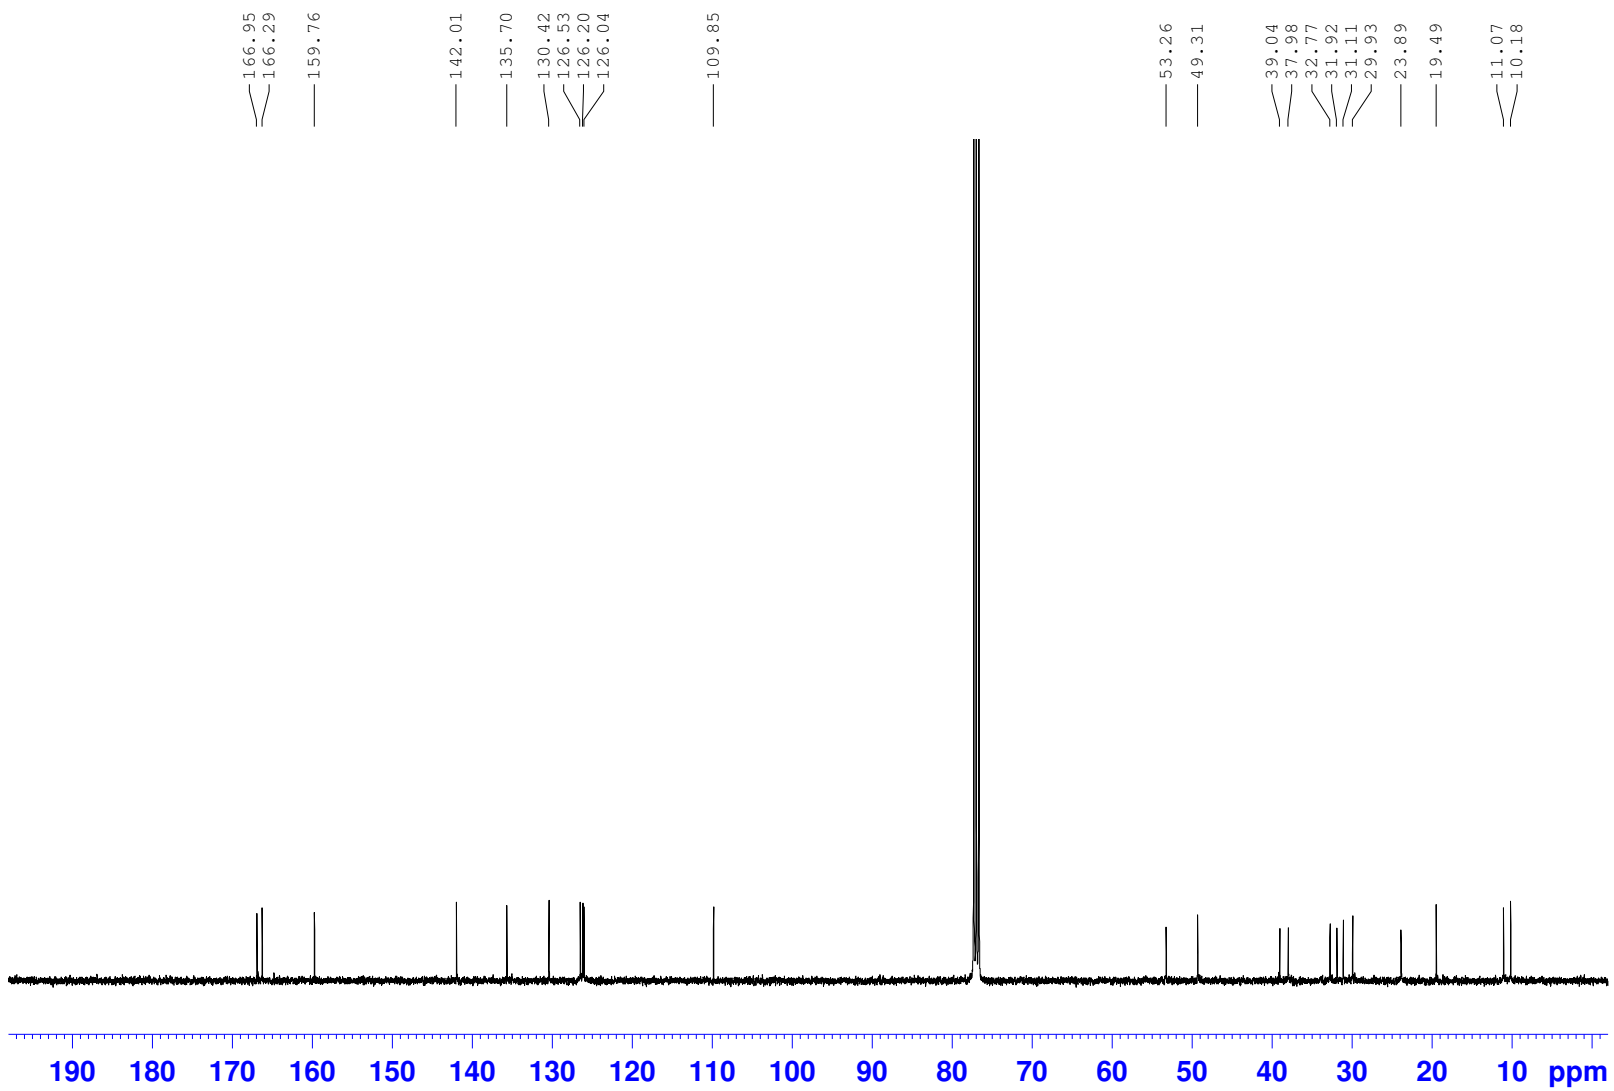

S118

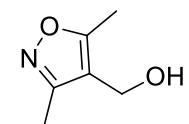

**28**

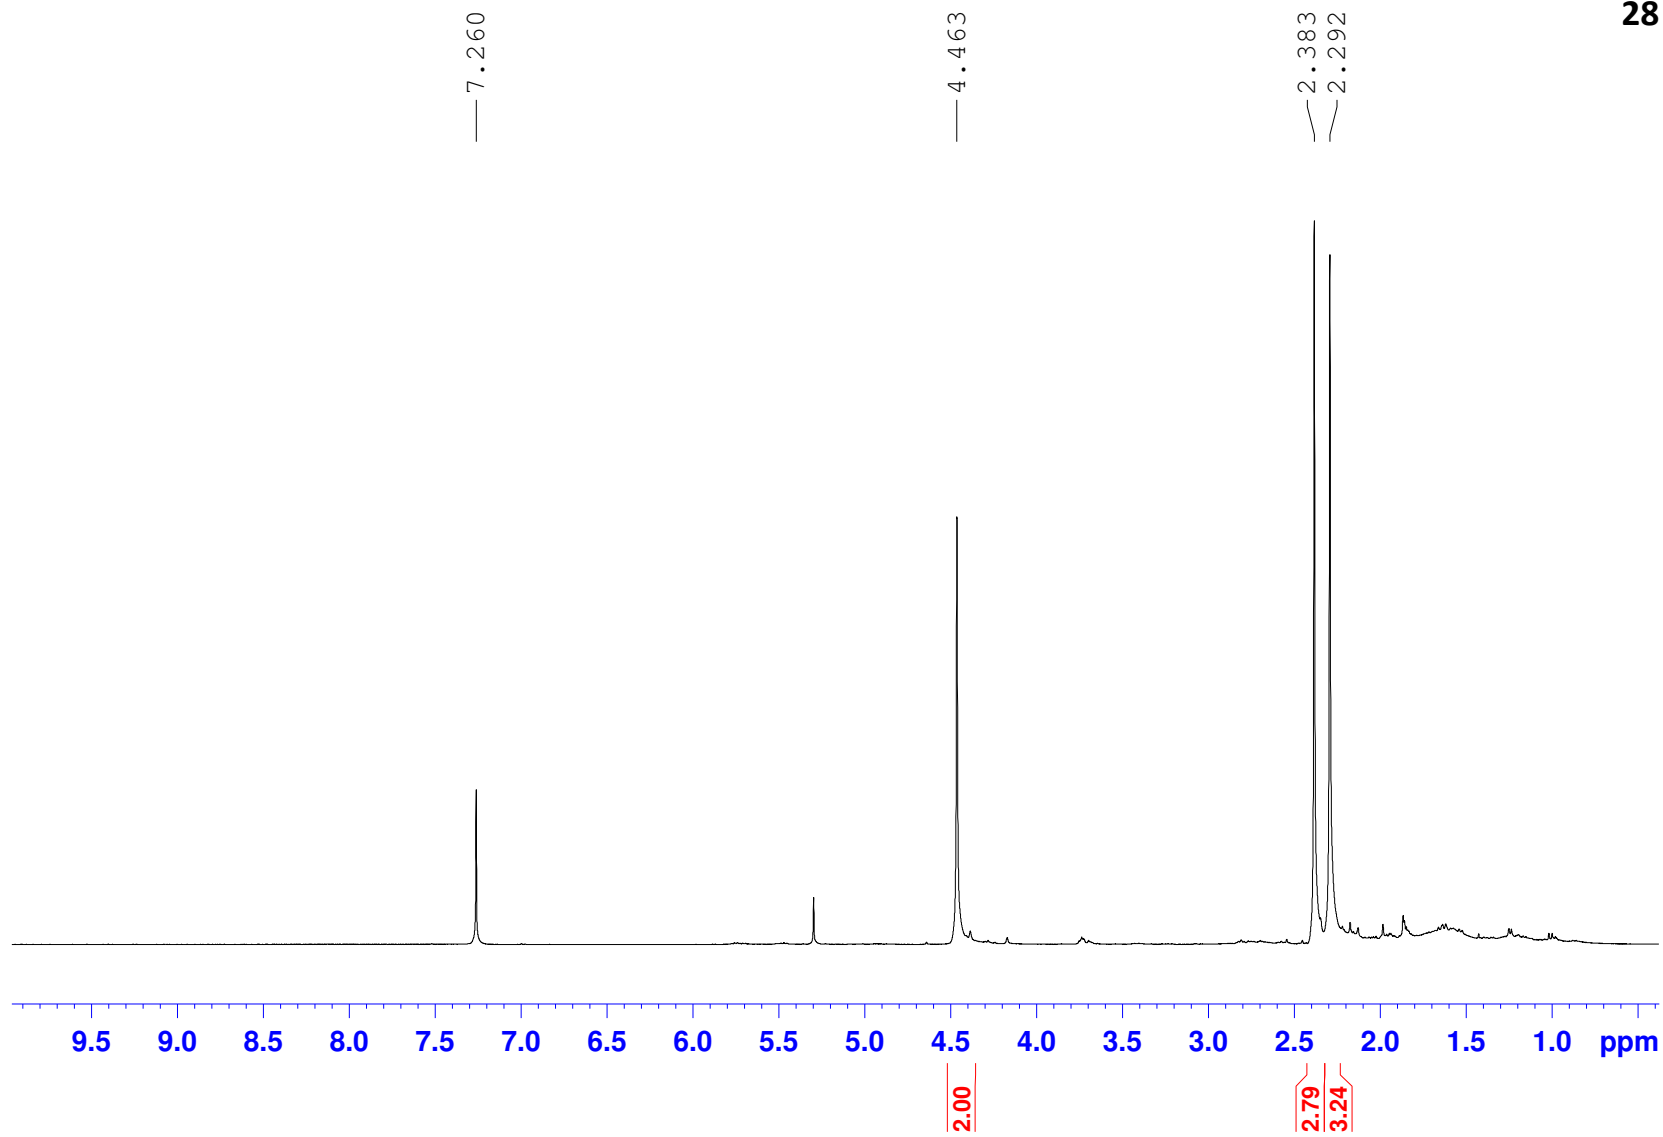

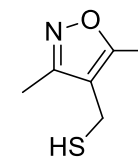**25**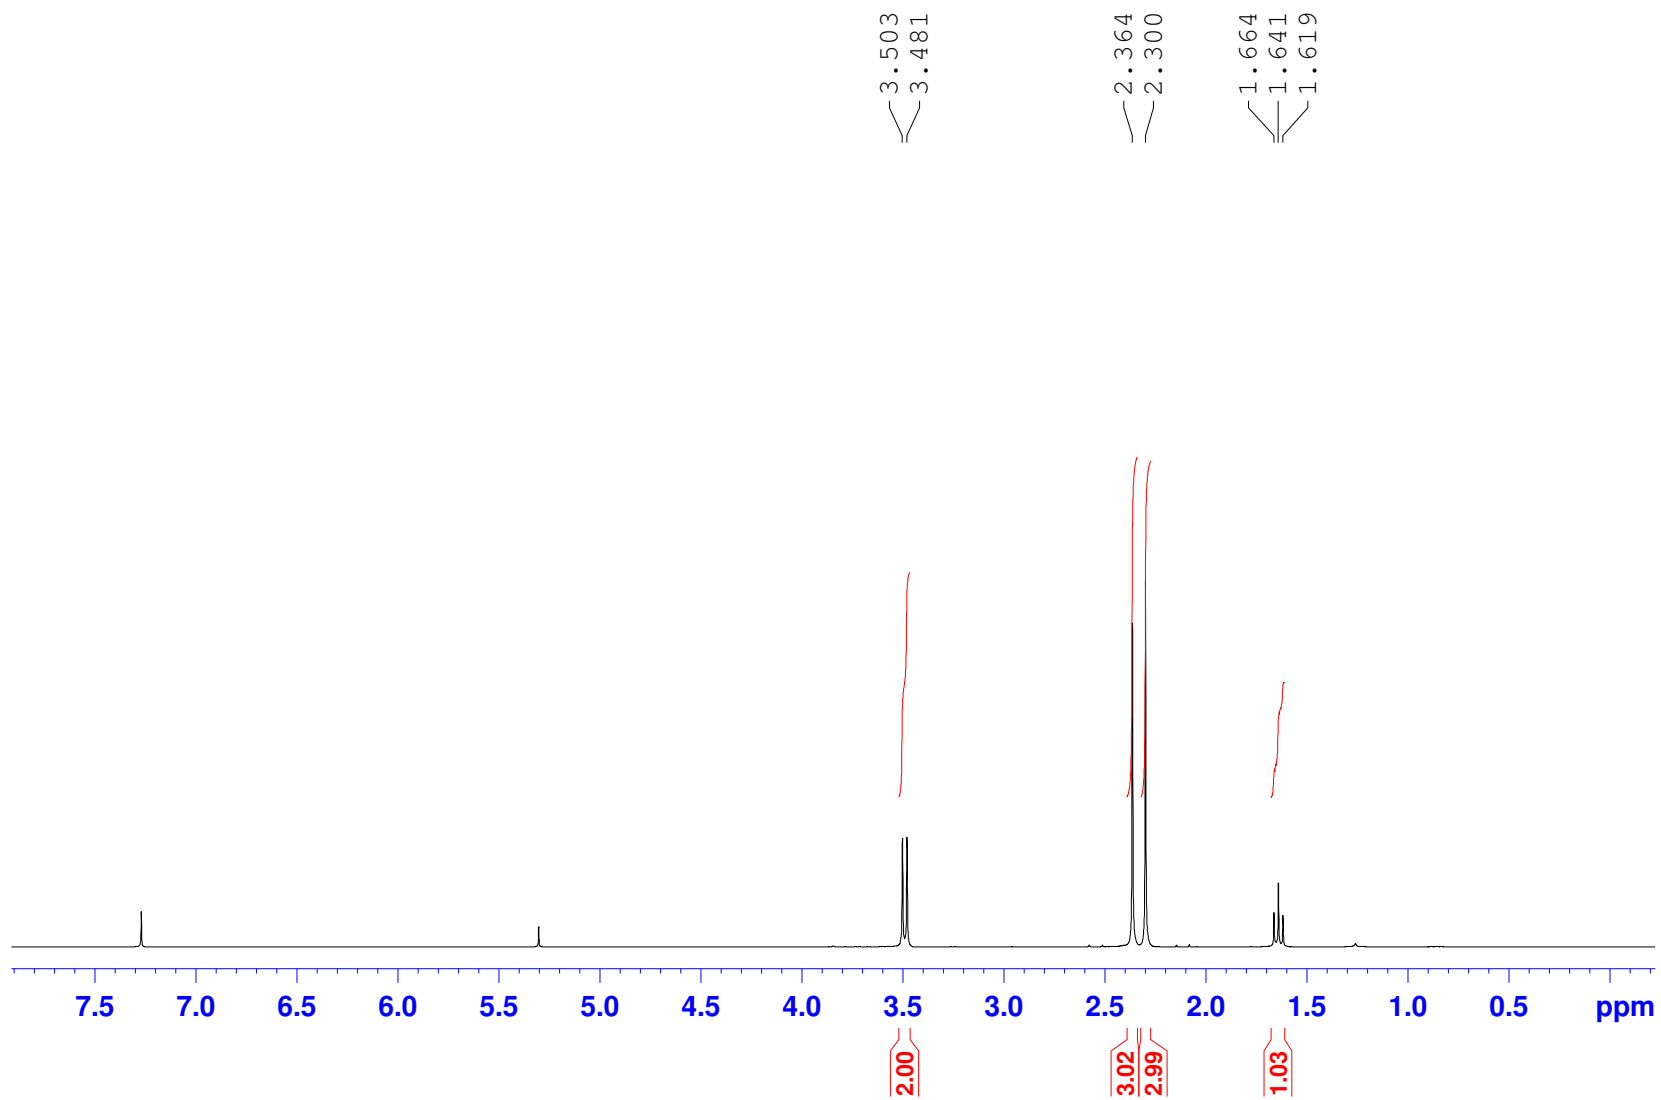

S120

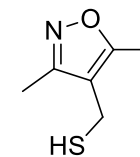

25

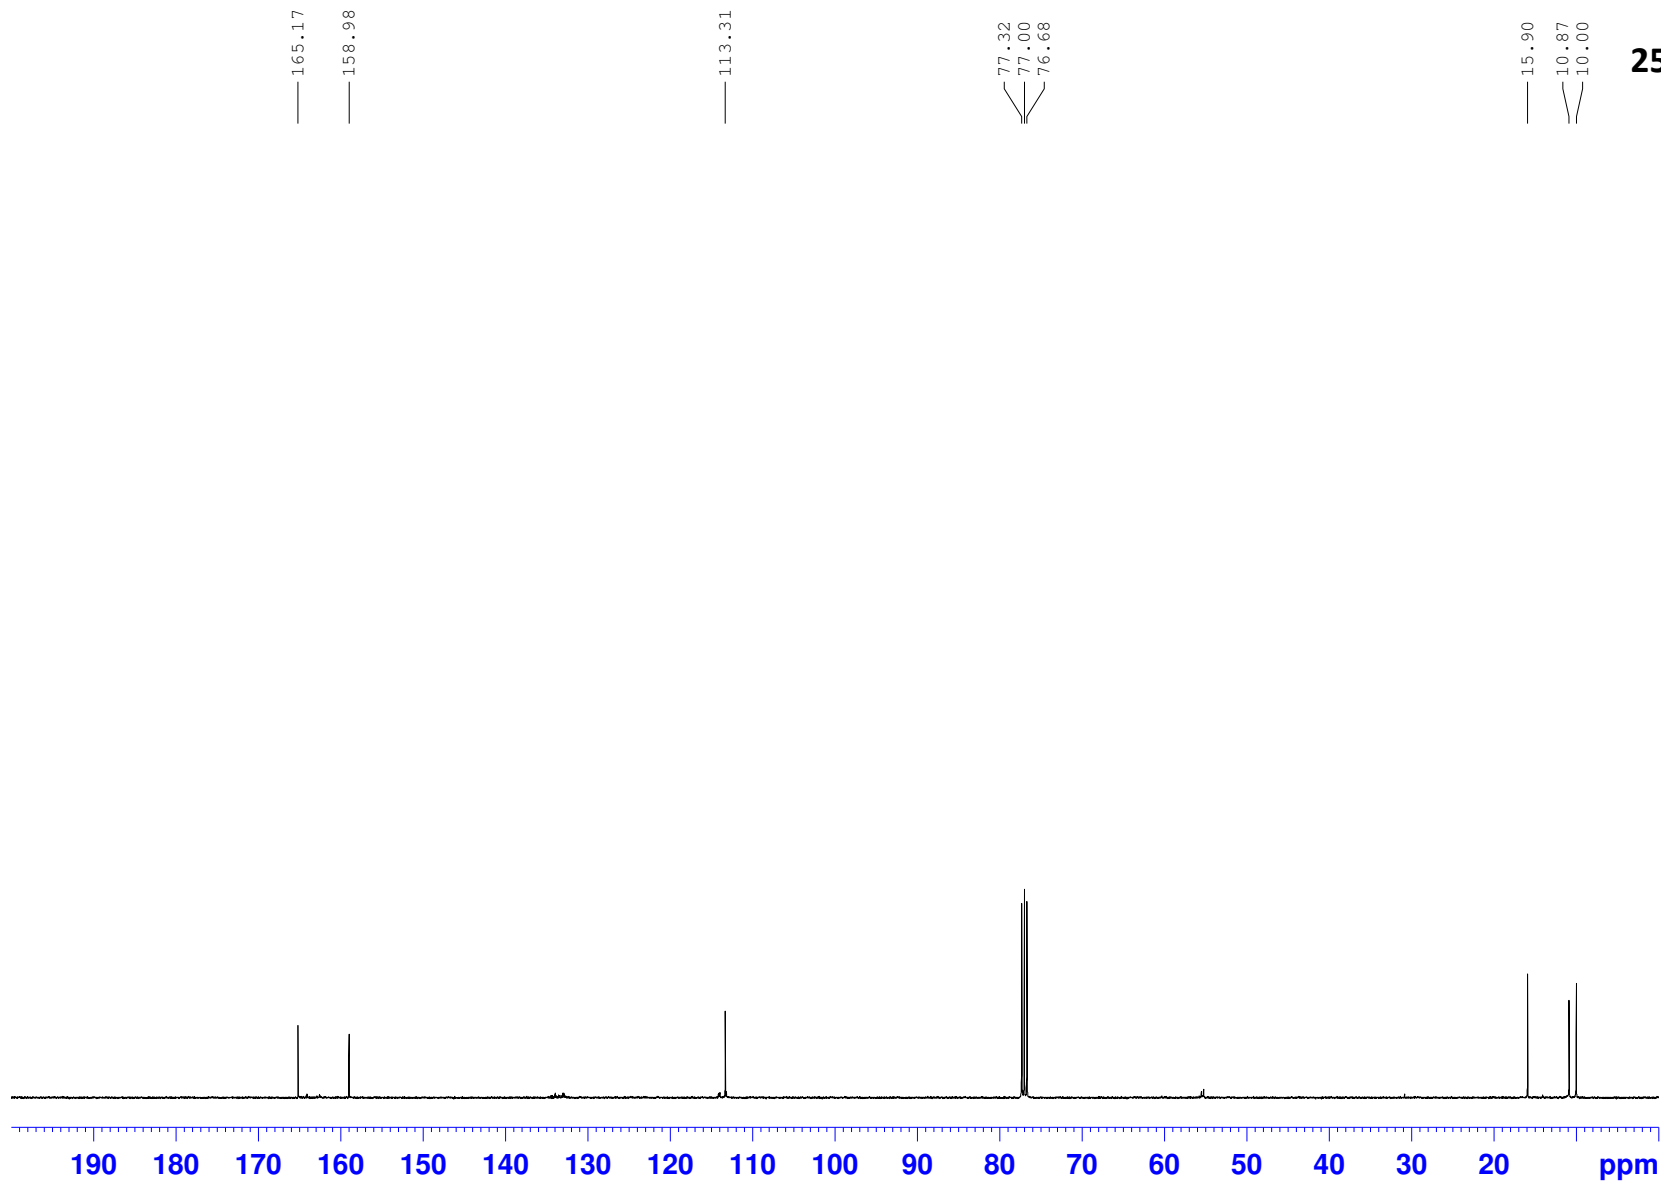



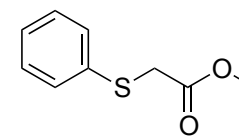**29**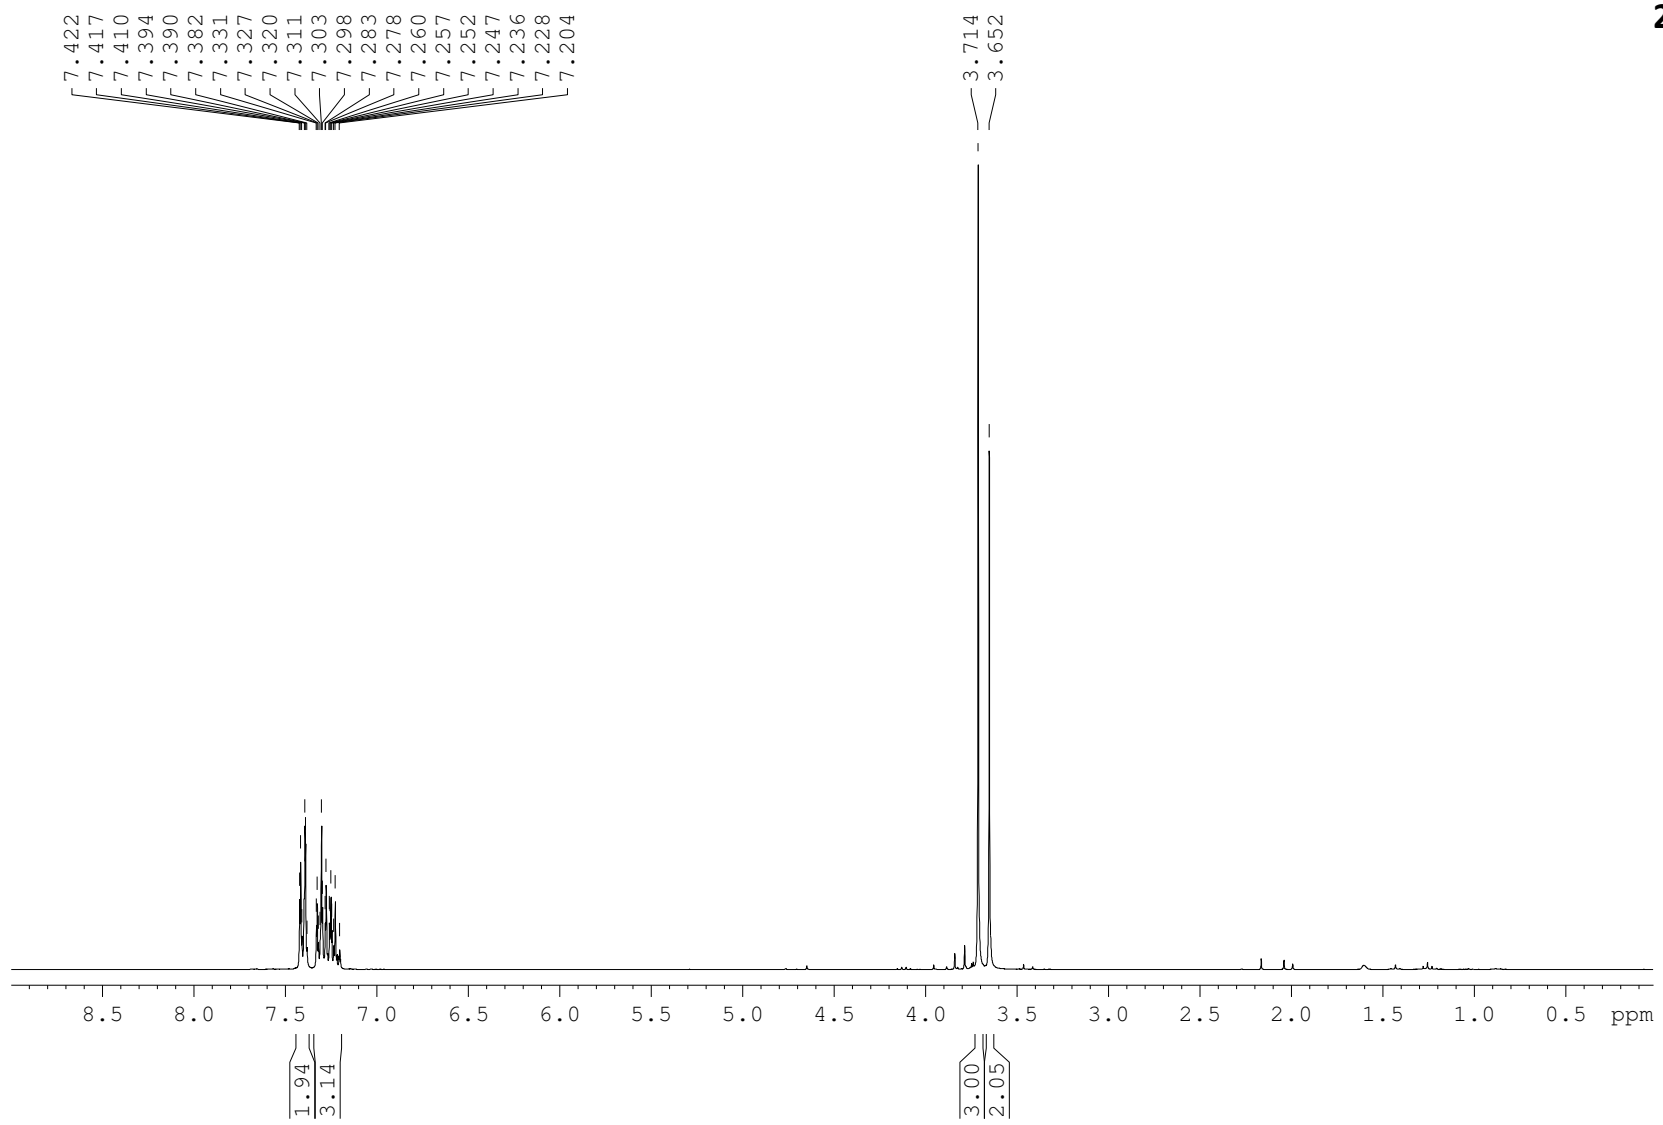

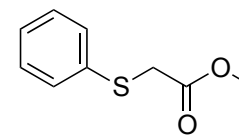**29**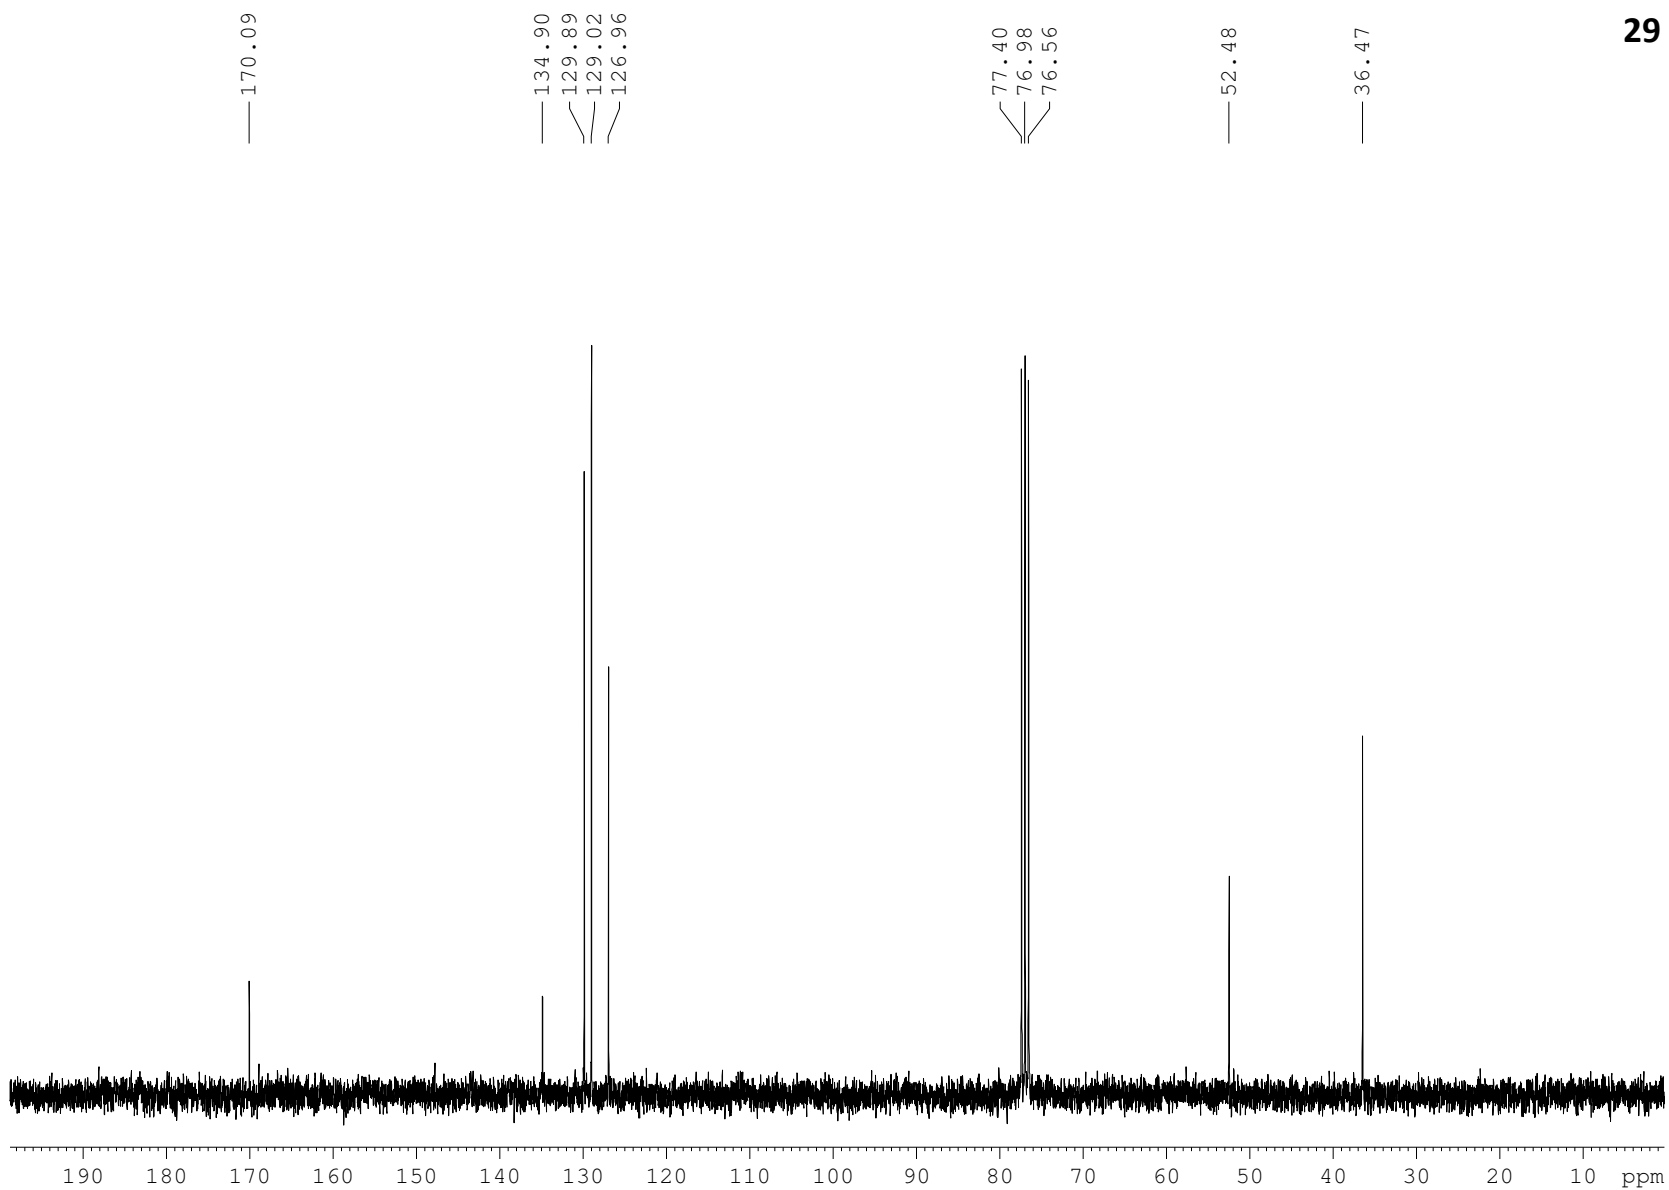

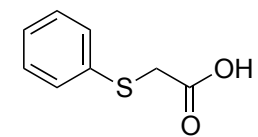**3d**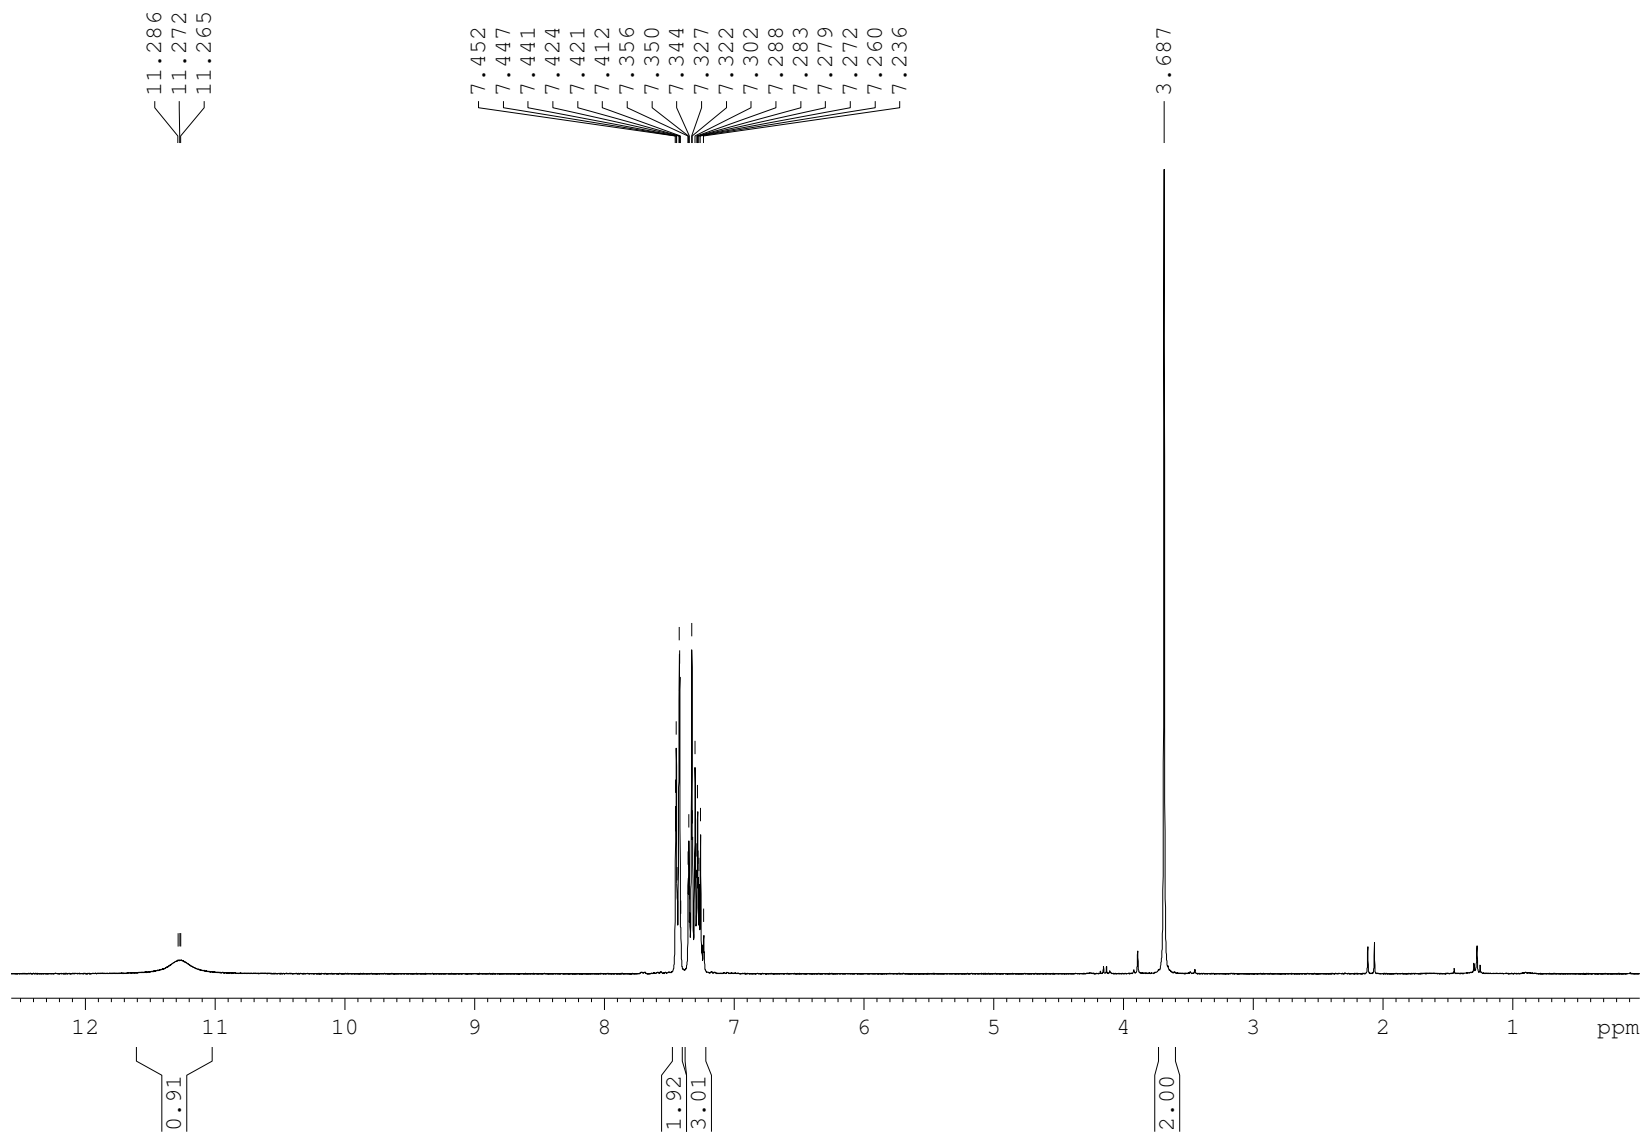

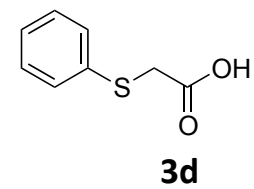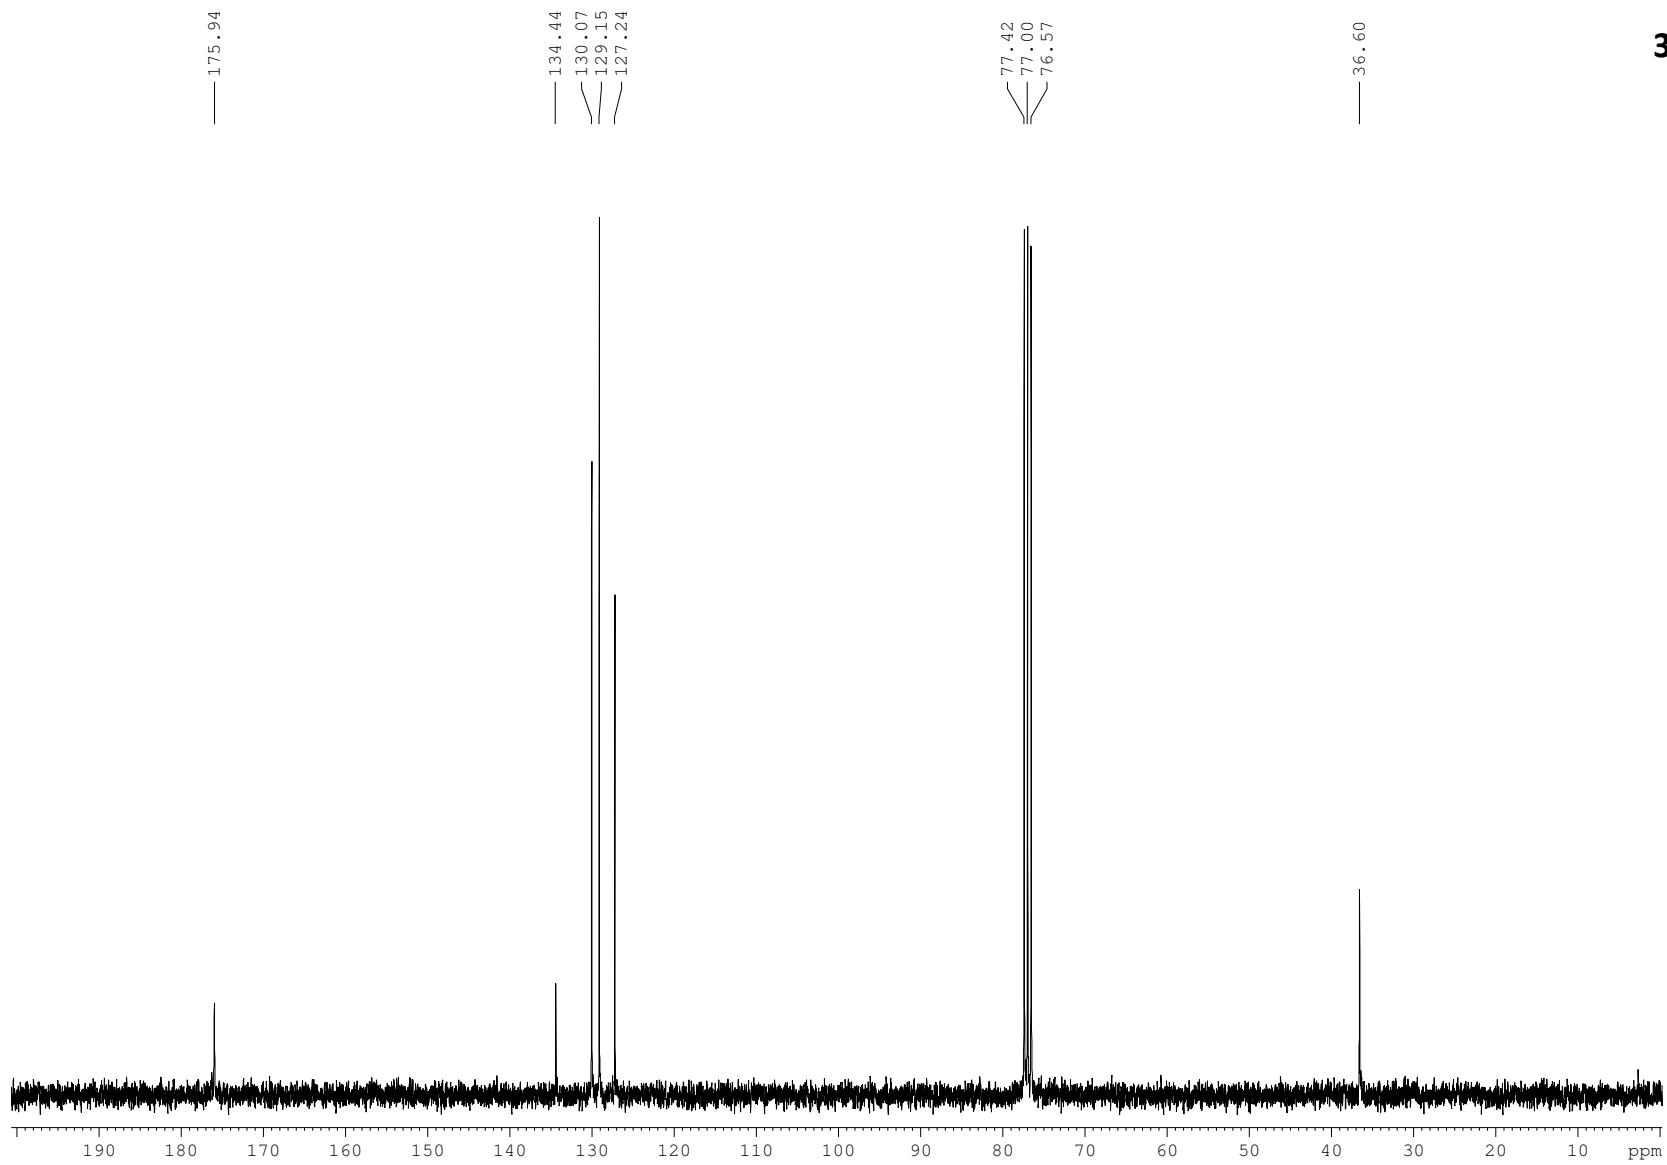

S125

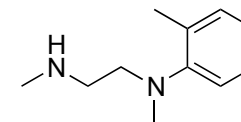

**4i**

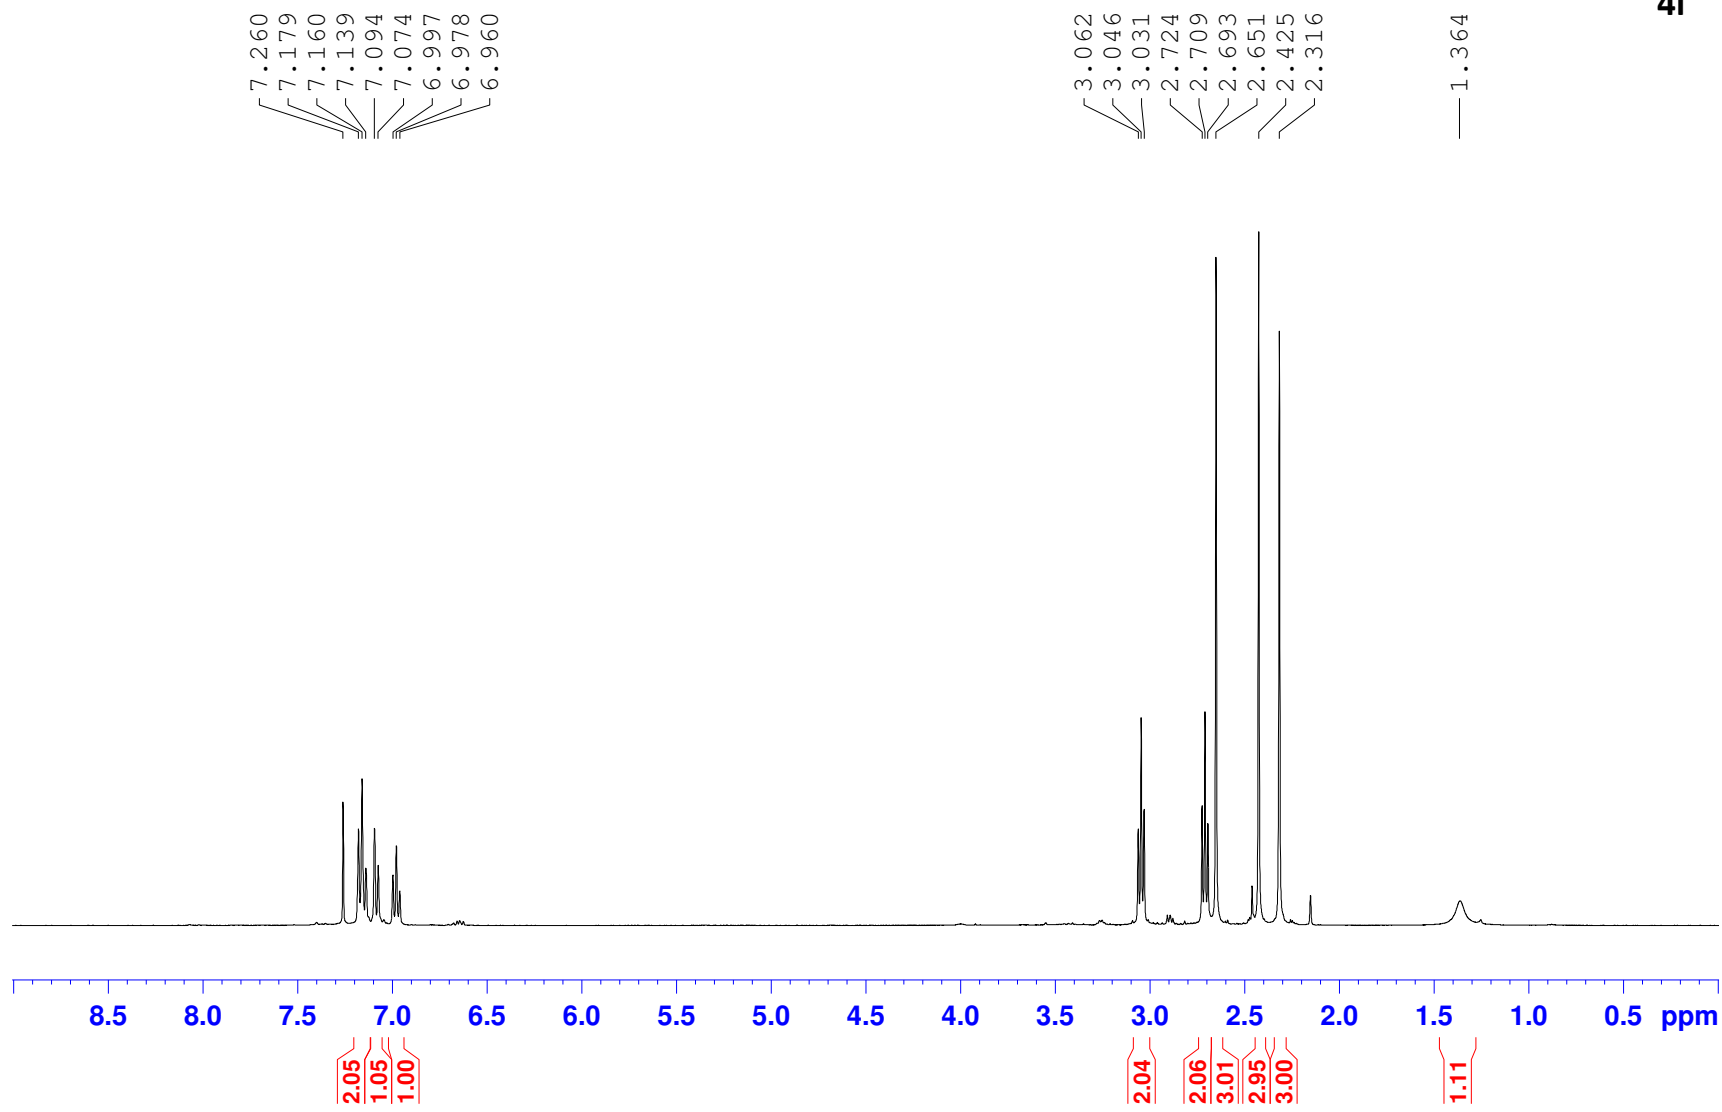

S126

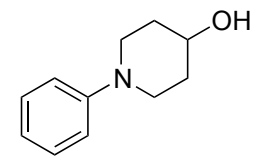

4n

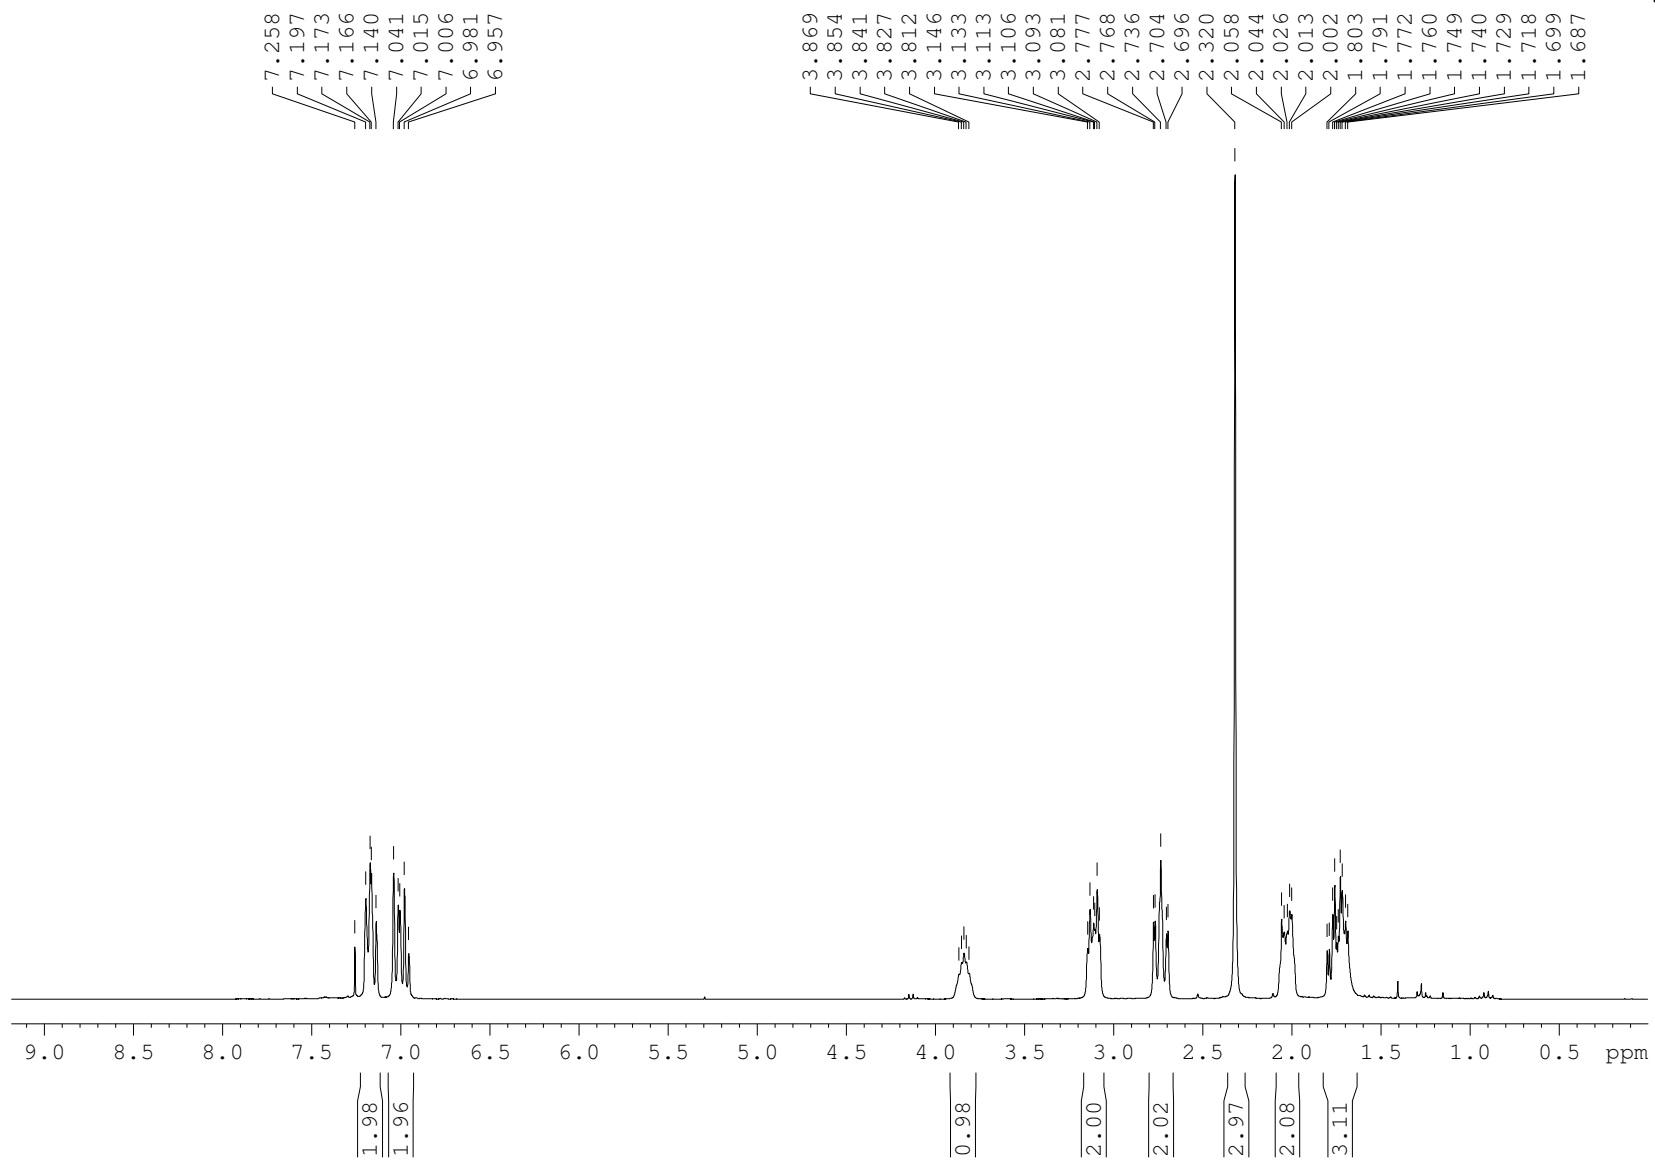

S127

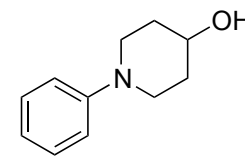

**4n**

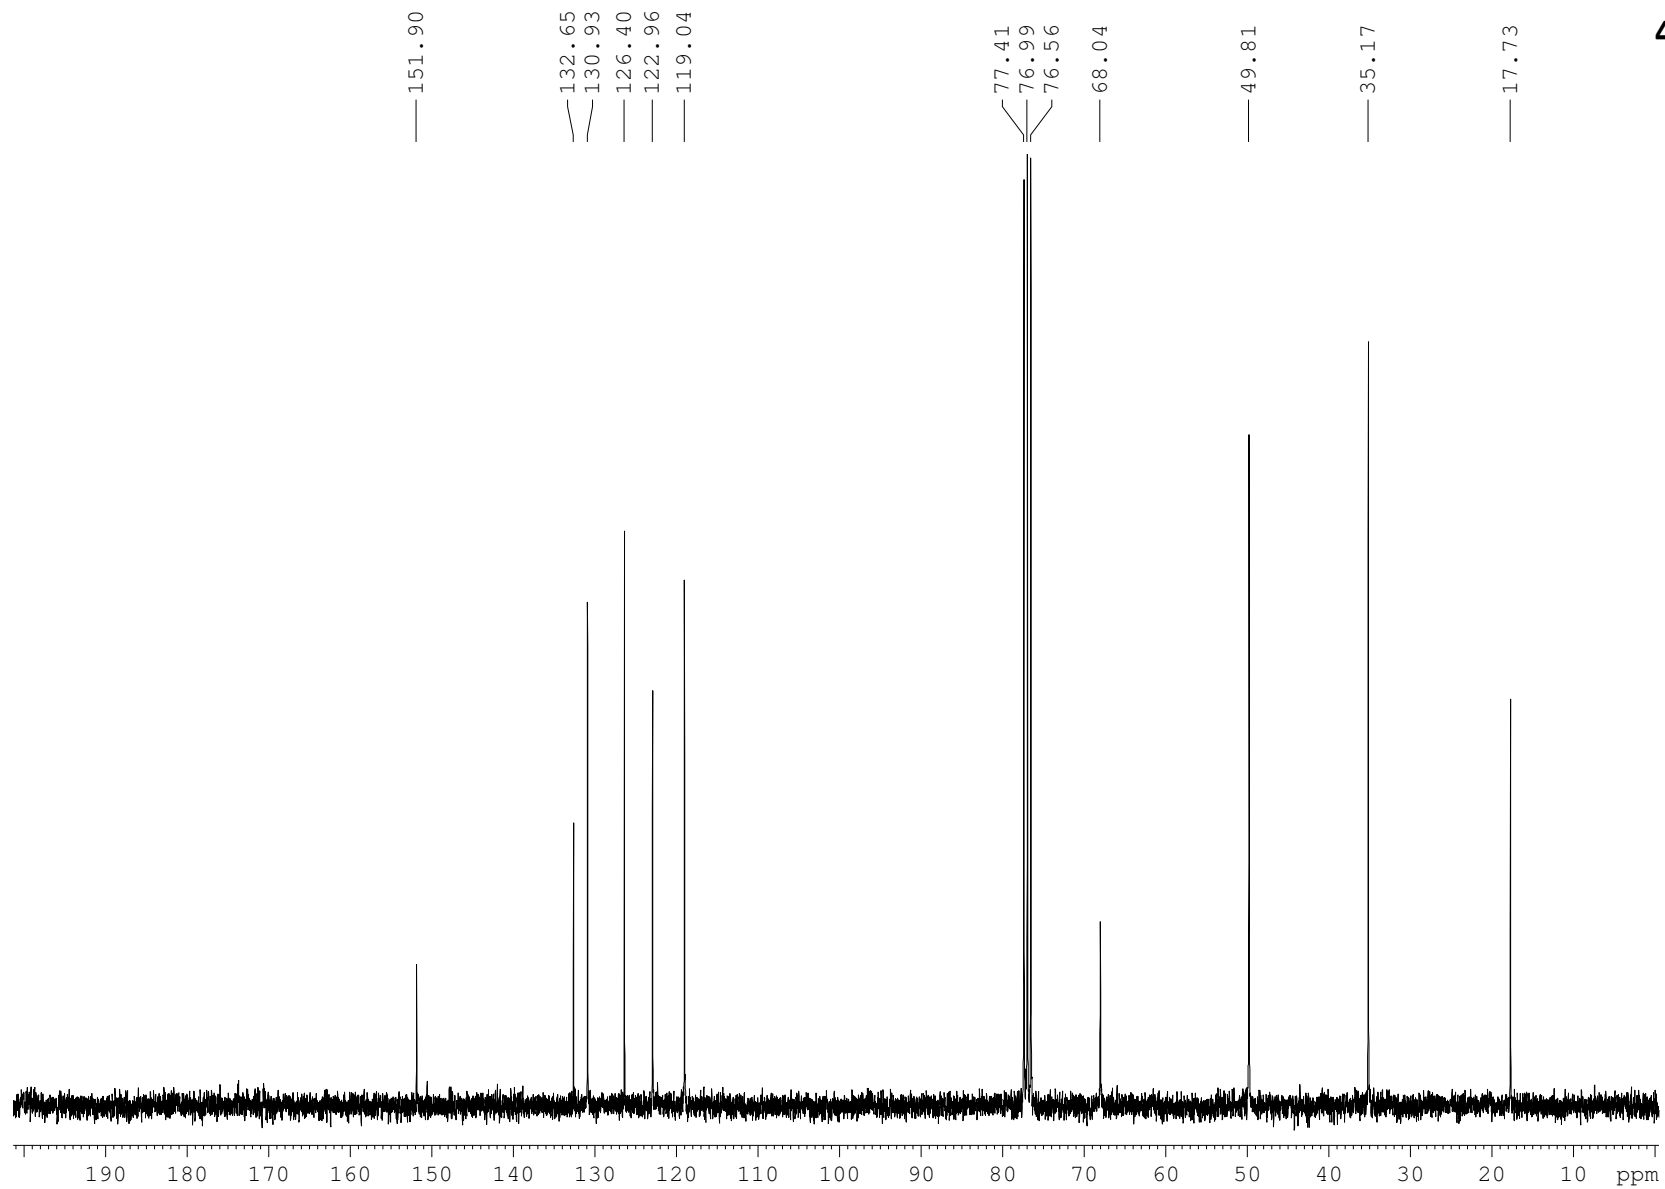

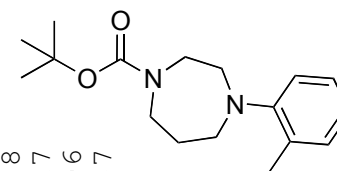**30a**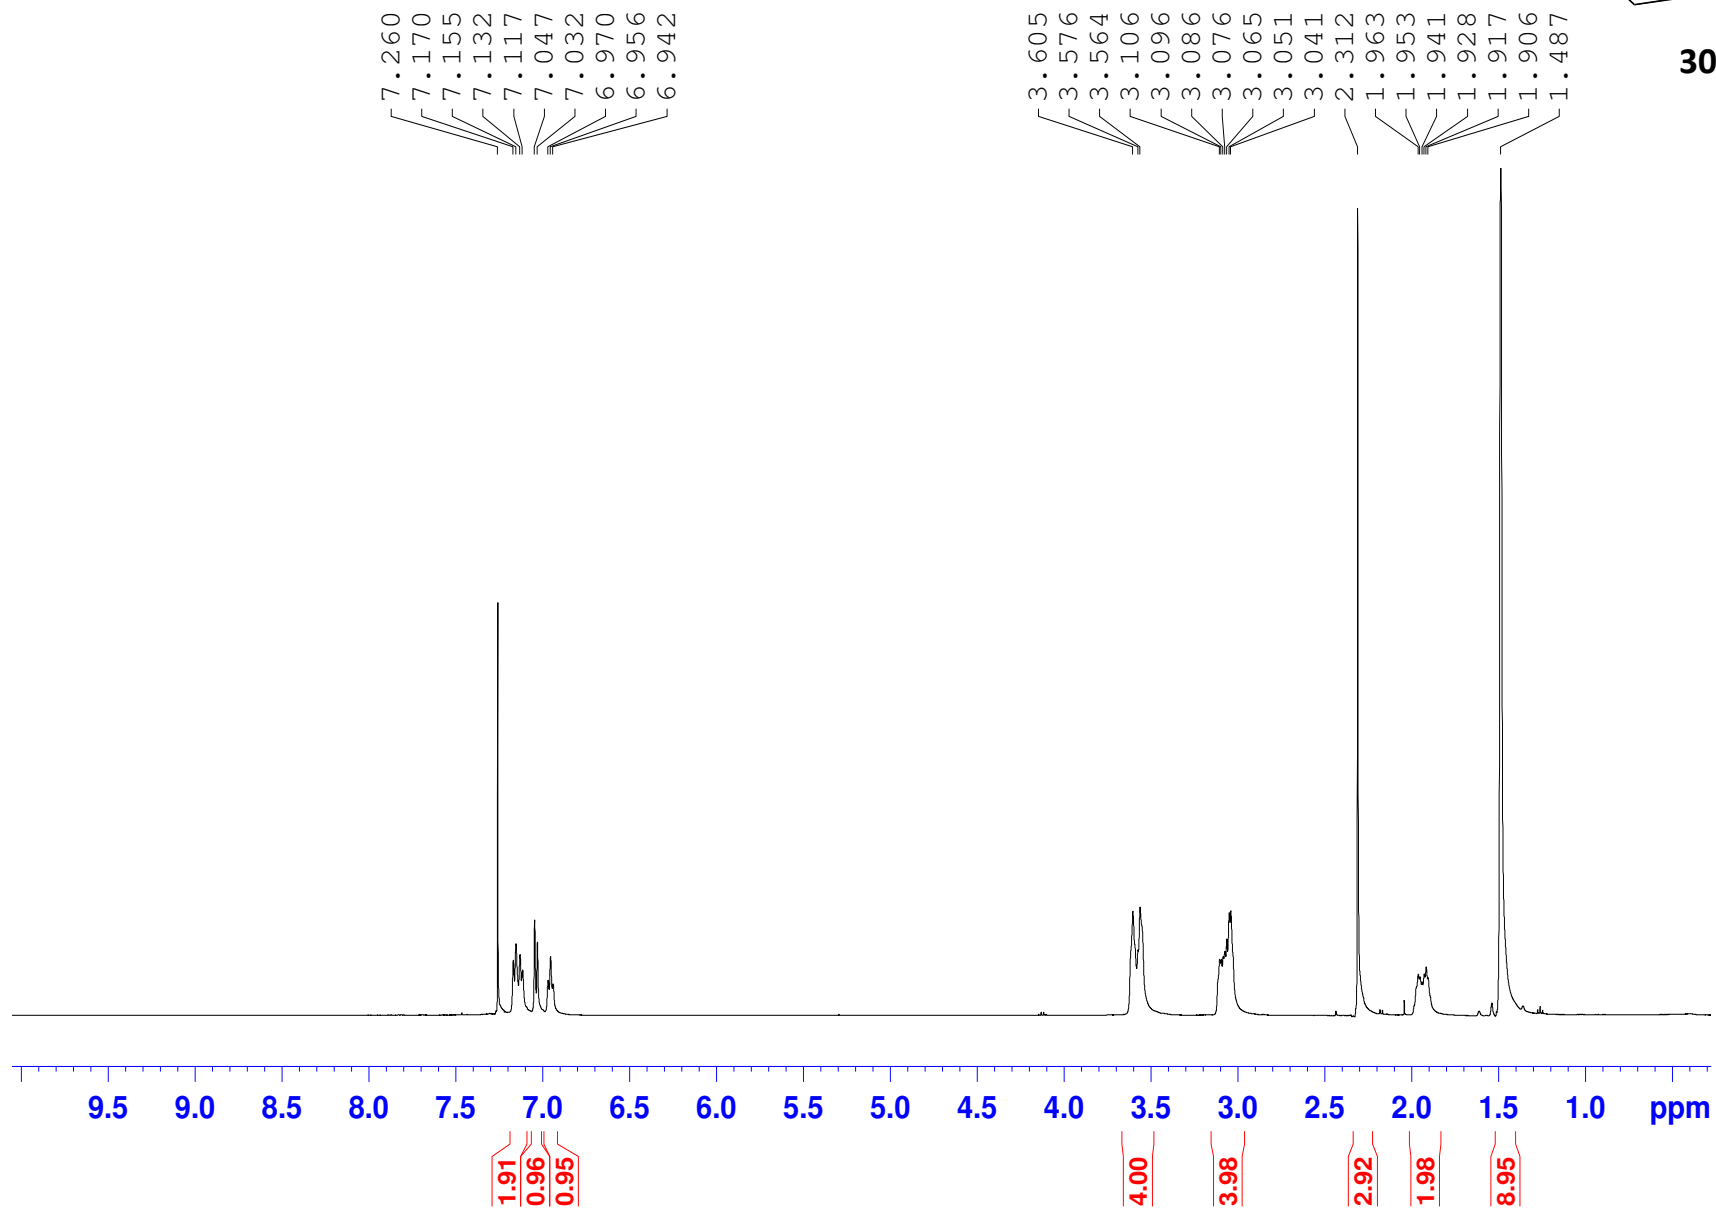



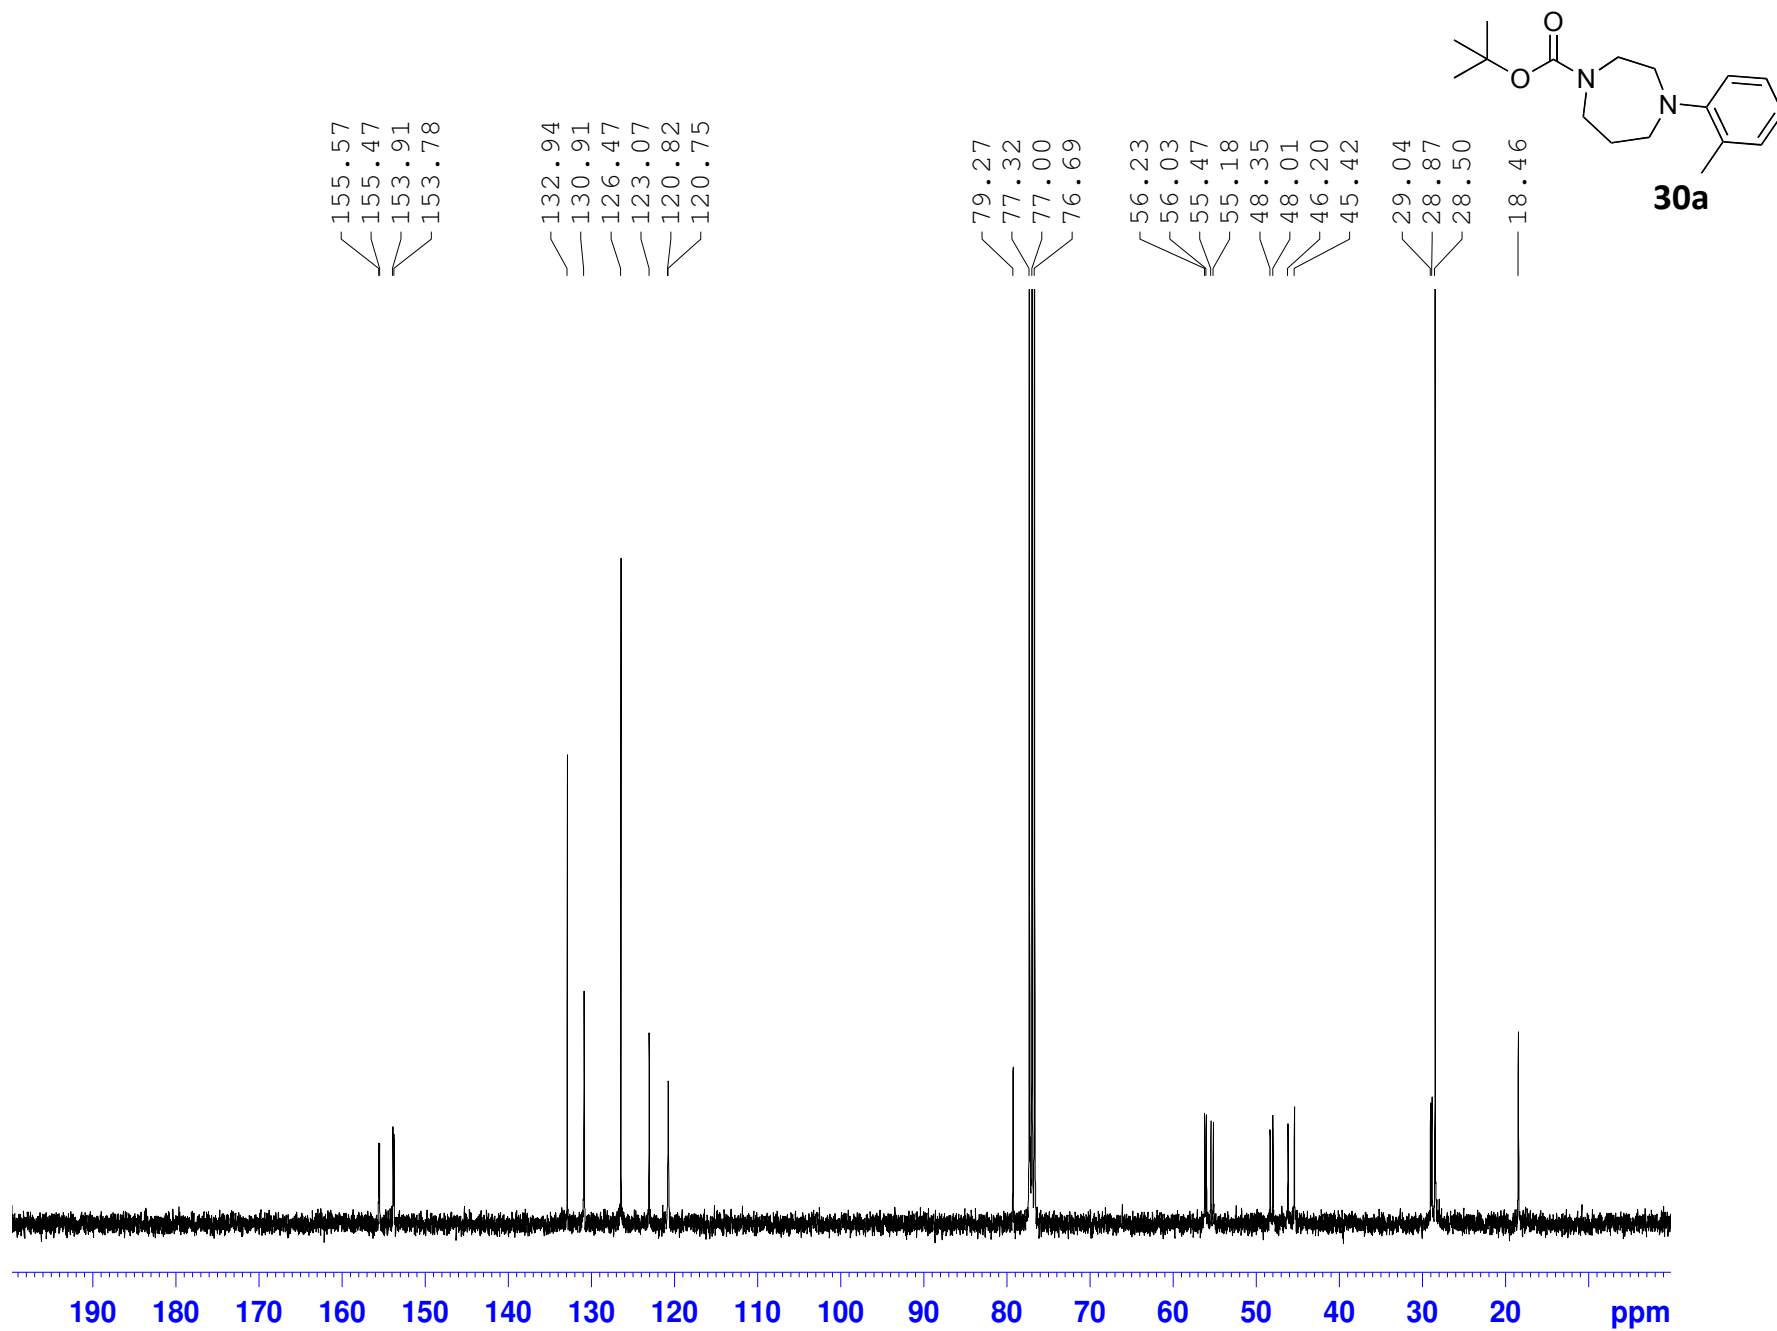

S130

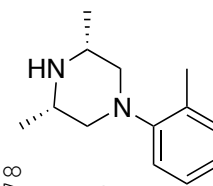

4k

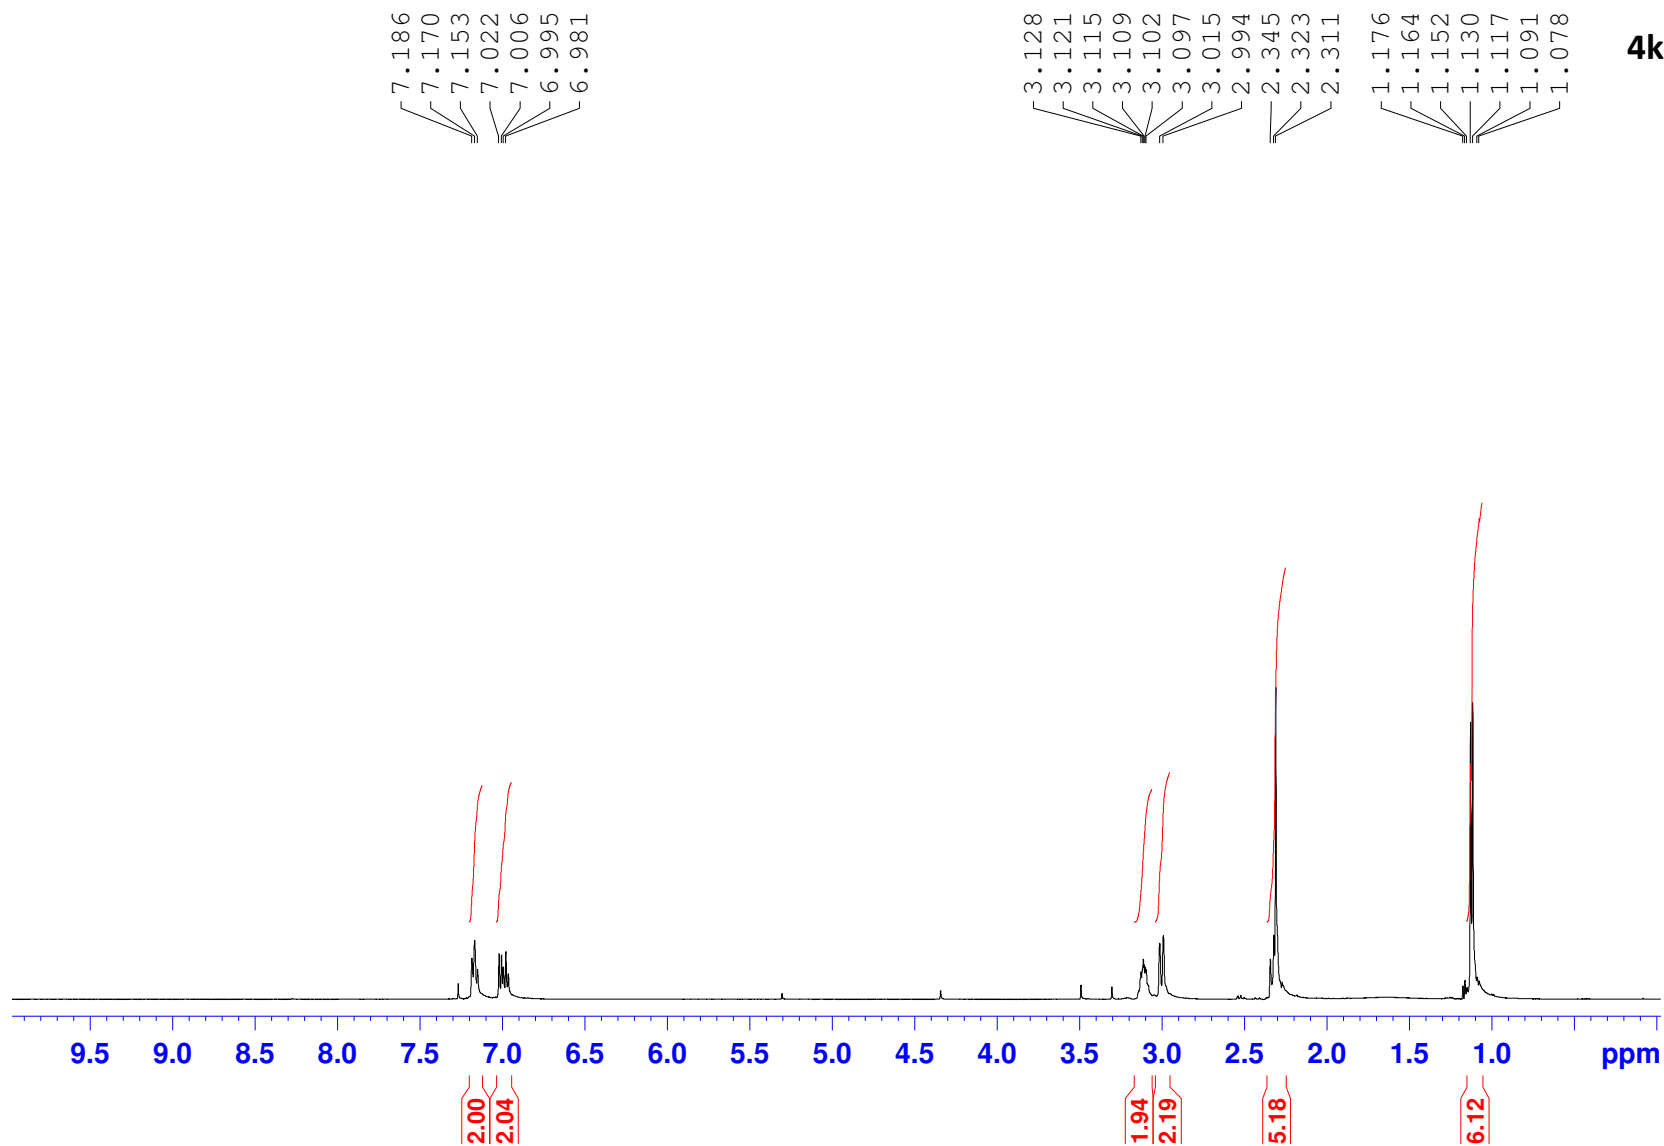

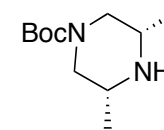**31**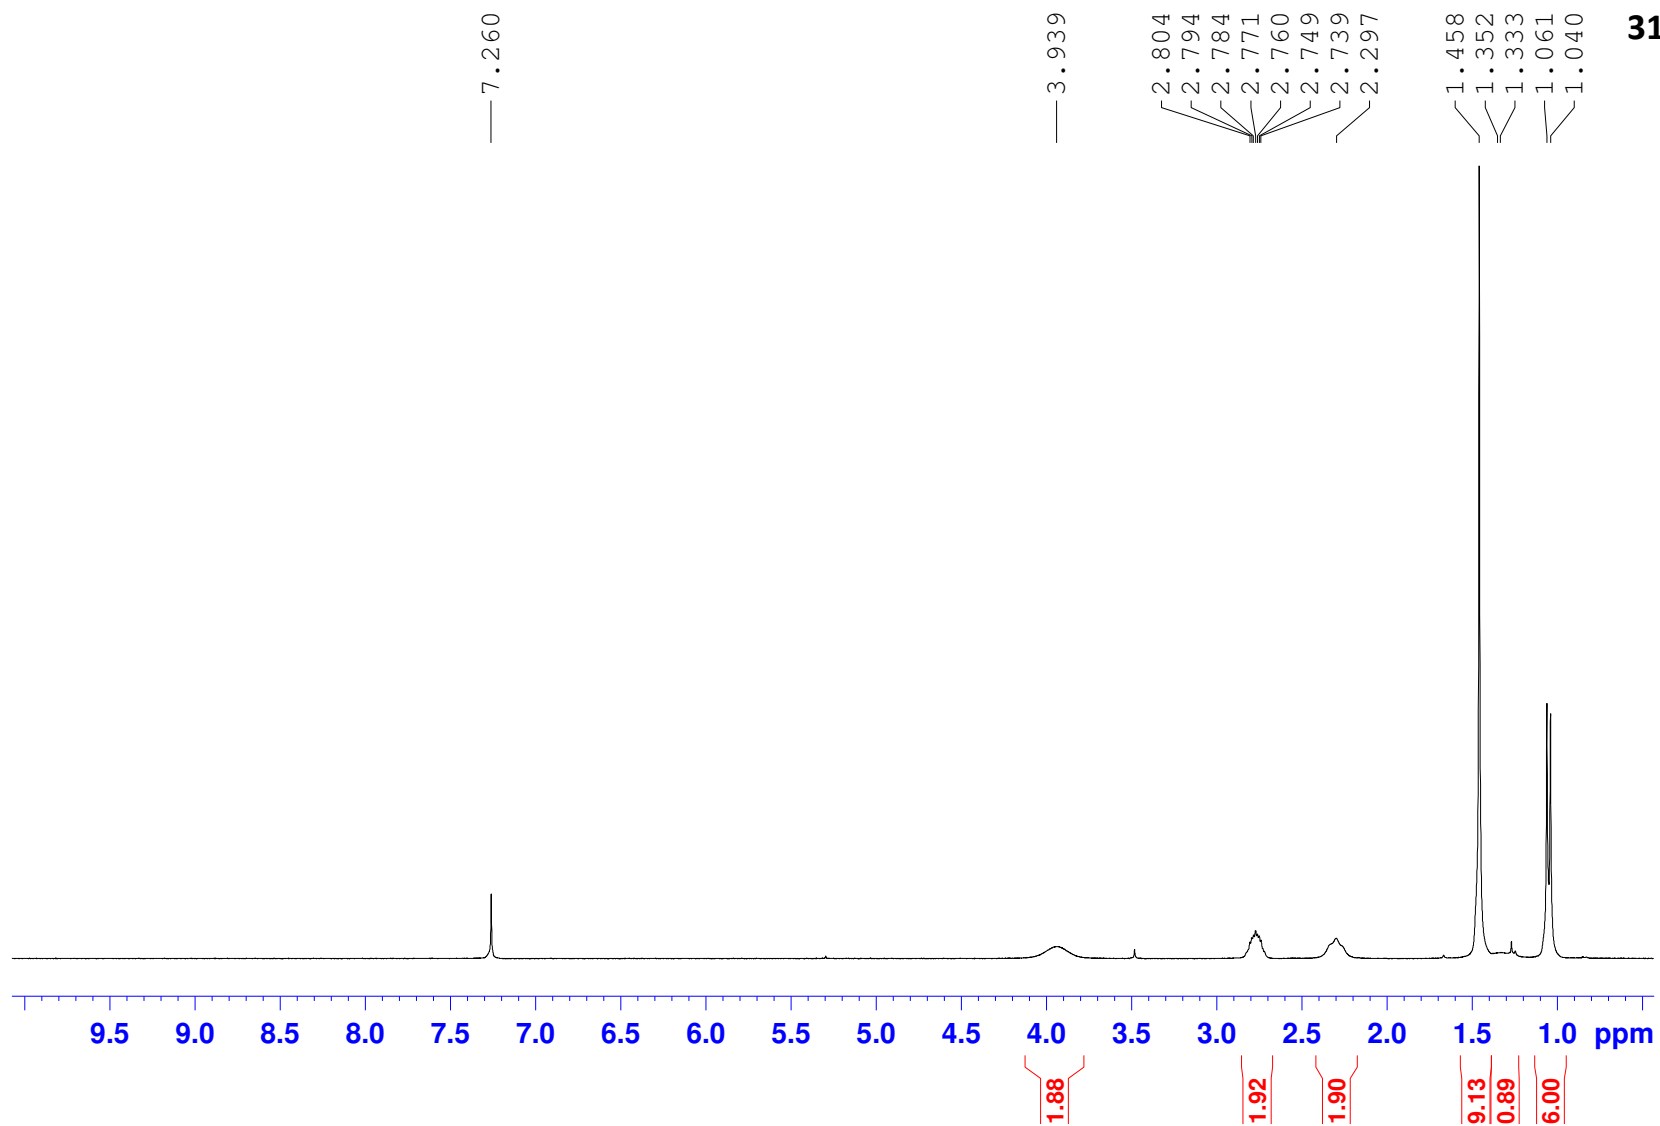

S132

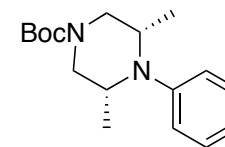

**30b**

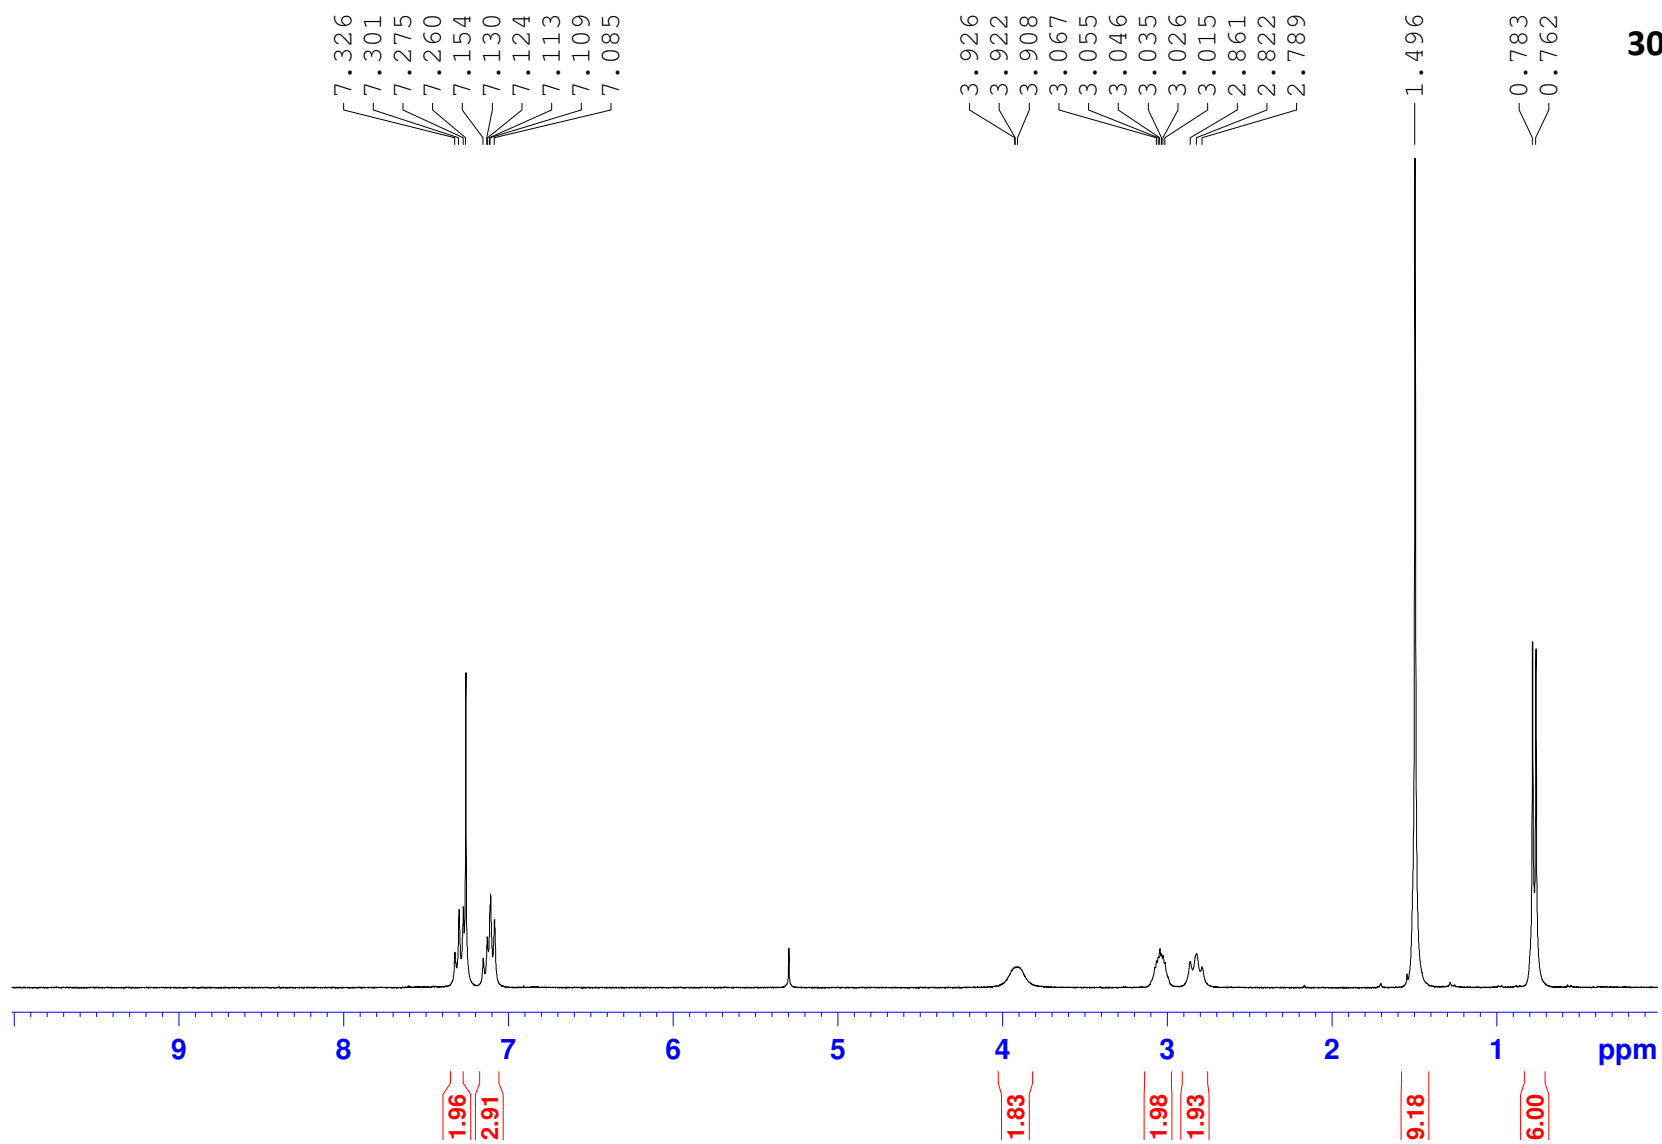

S133

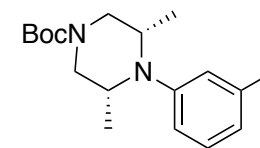

**30c**

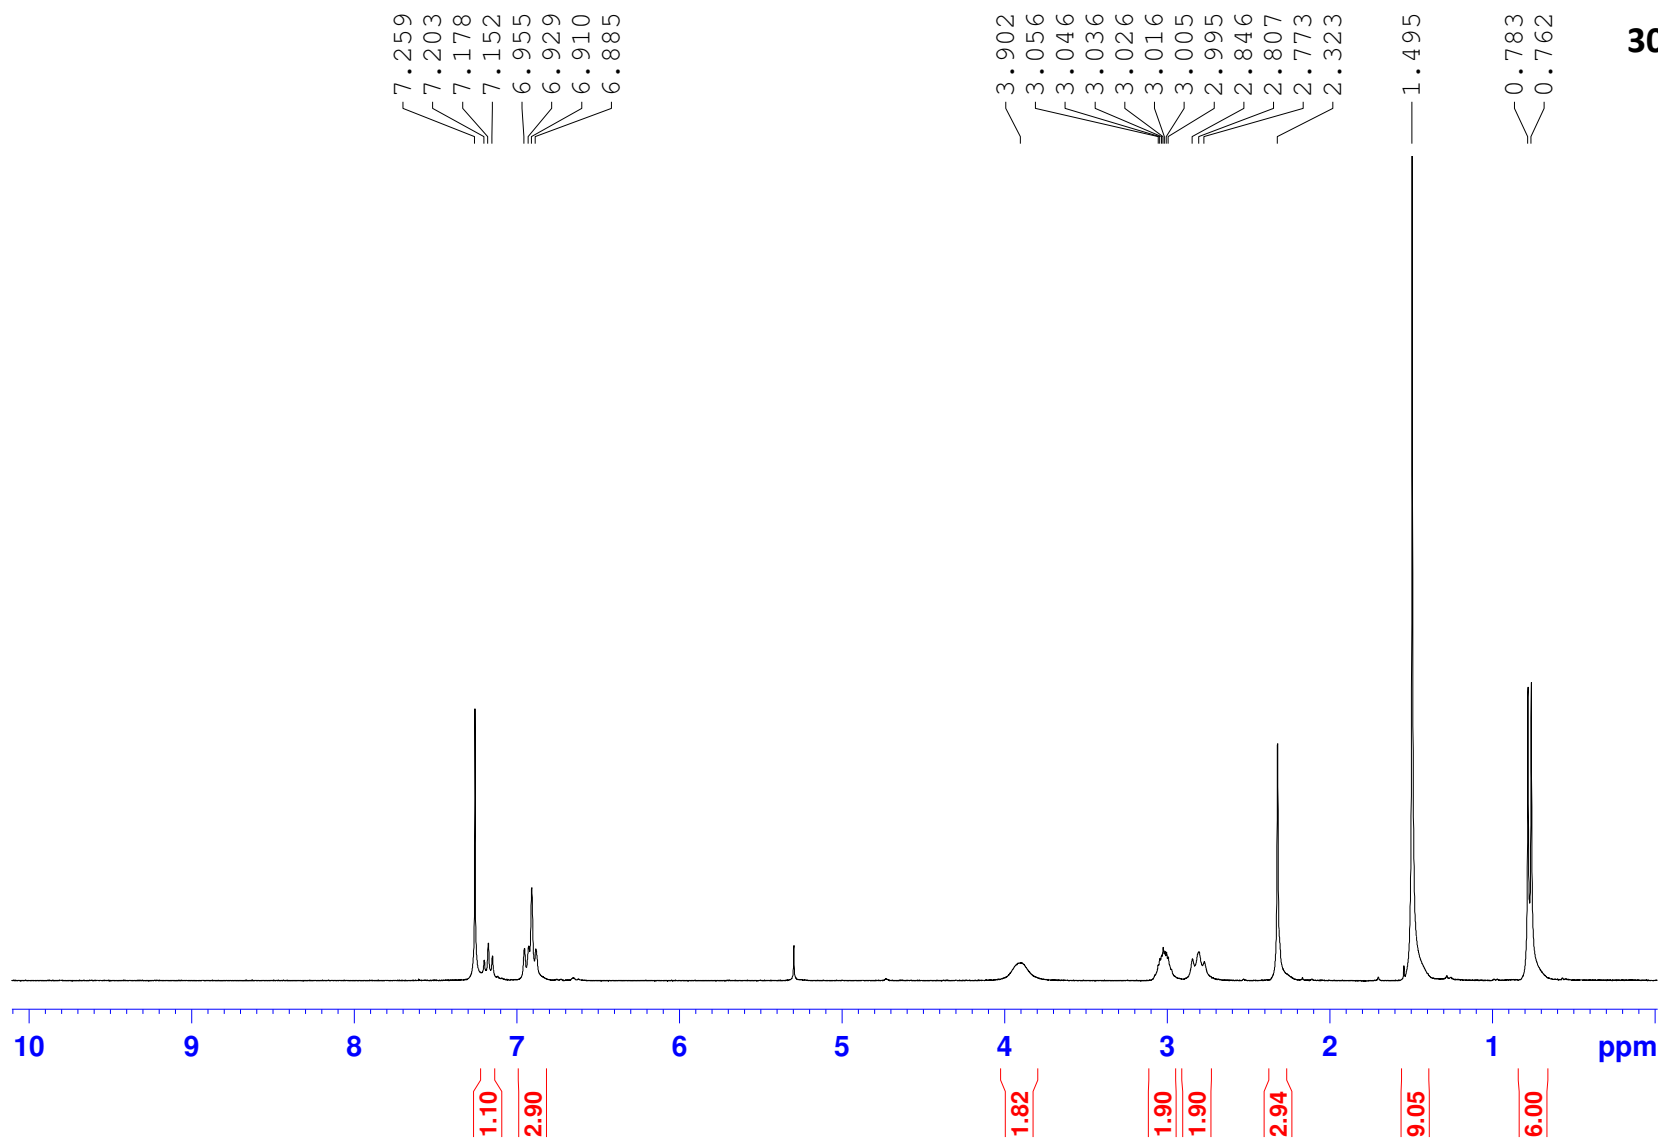

S134

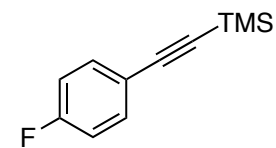

**32**

0.245

7.467  
7.460  
7.449  
7.437  
7.426  
7.419  
7.259  
7.015  
7.008  
6.986  
6.963  
6.957

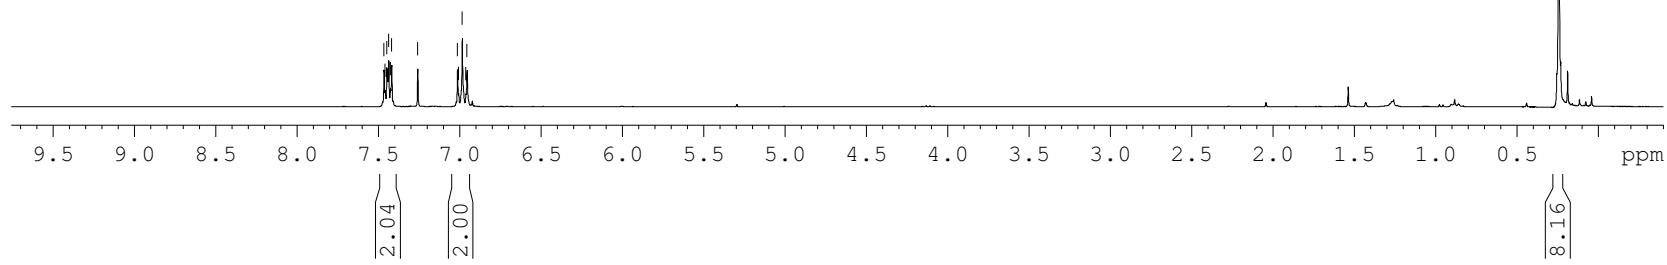

S135

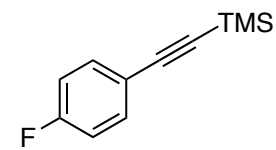

**32**

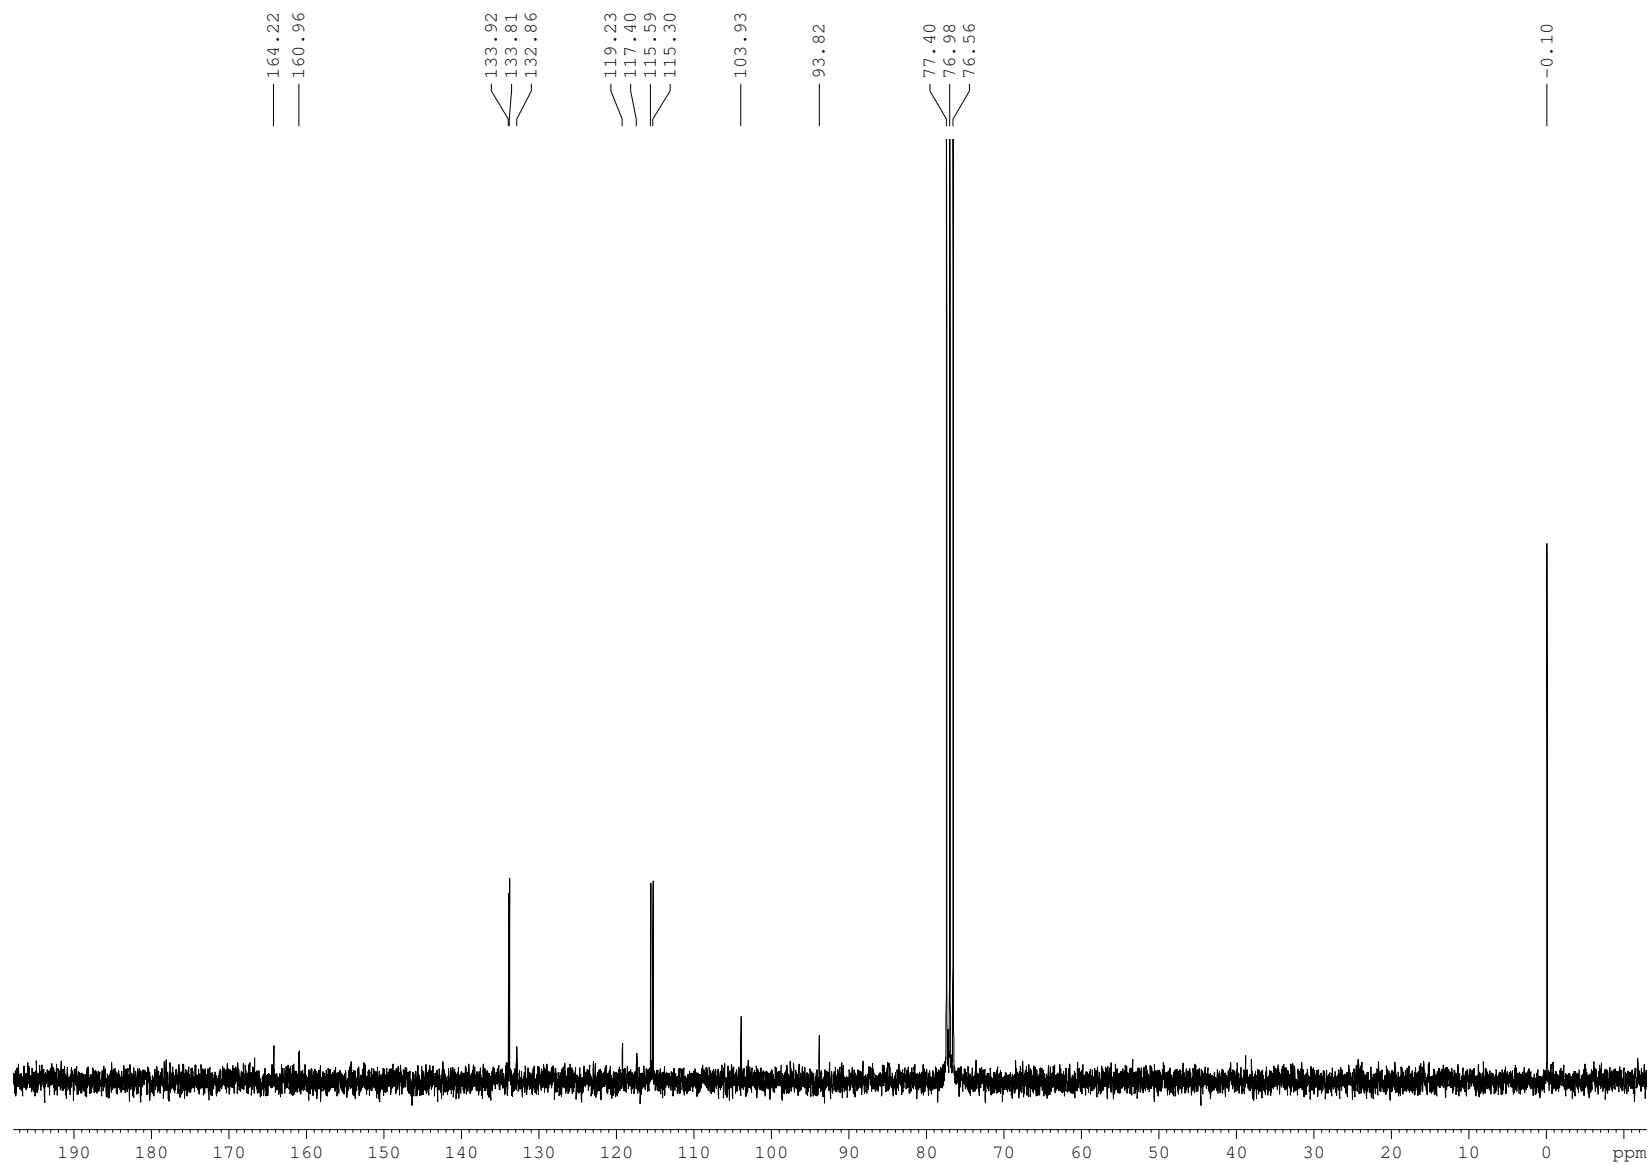

S136

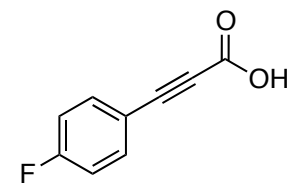

**33**

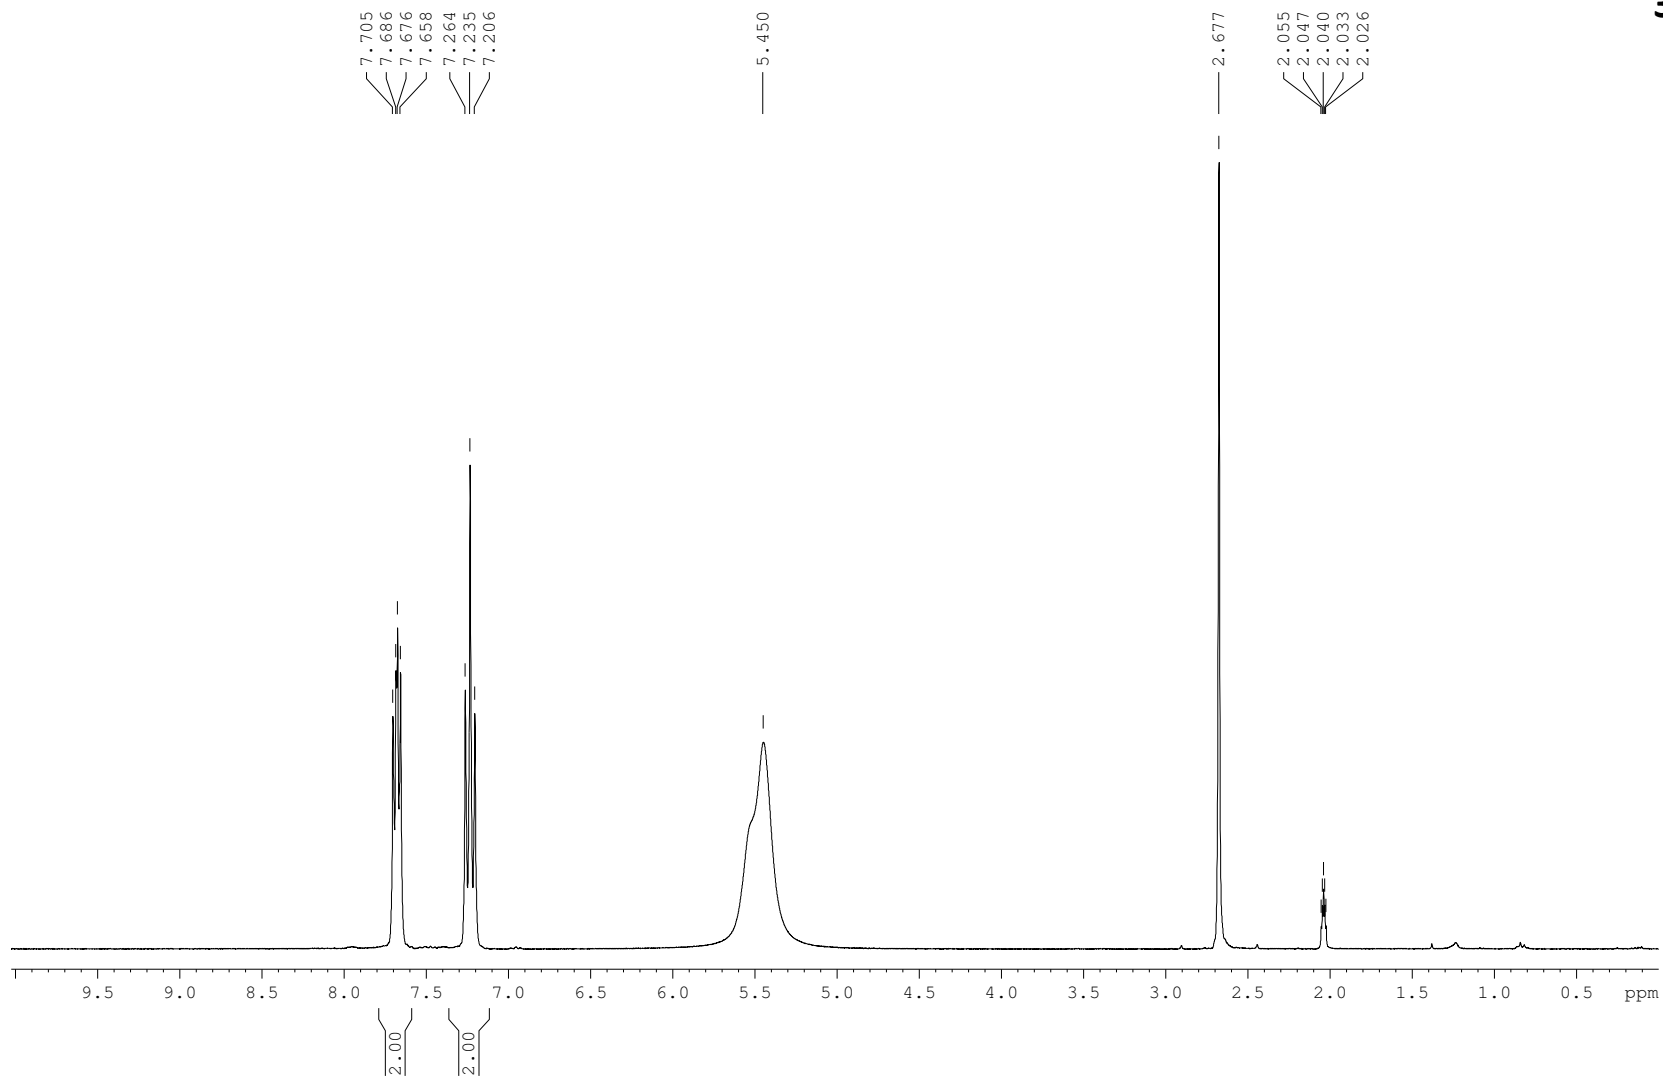



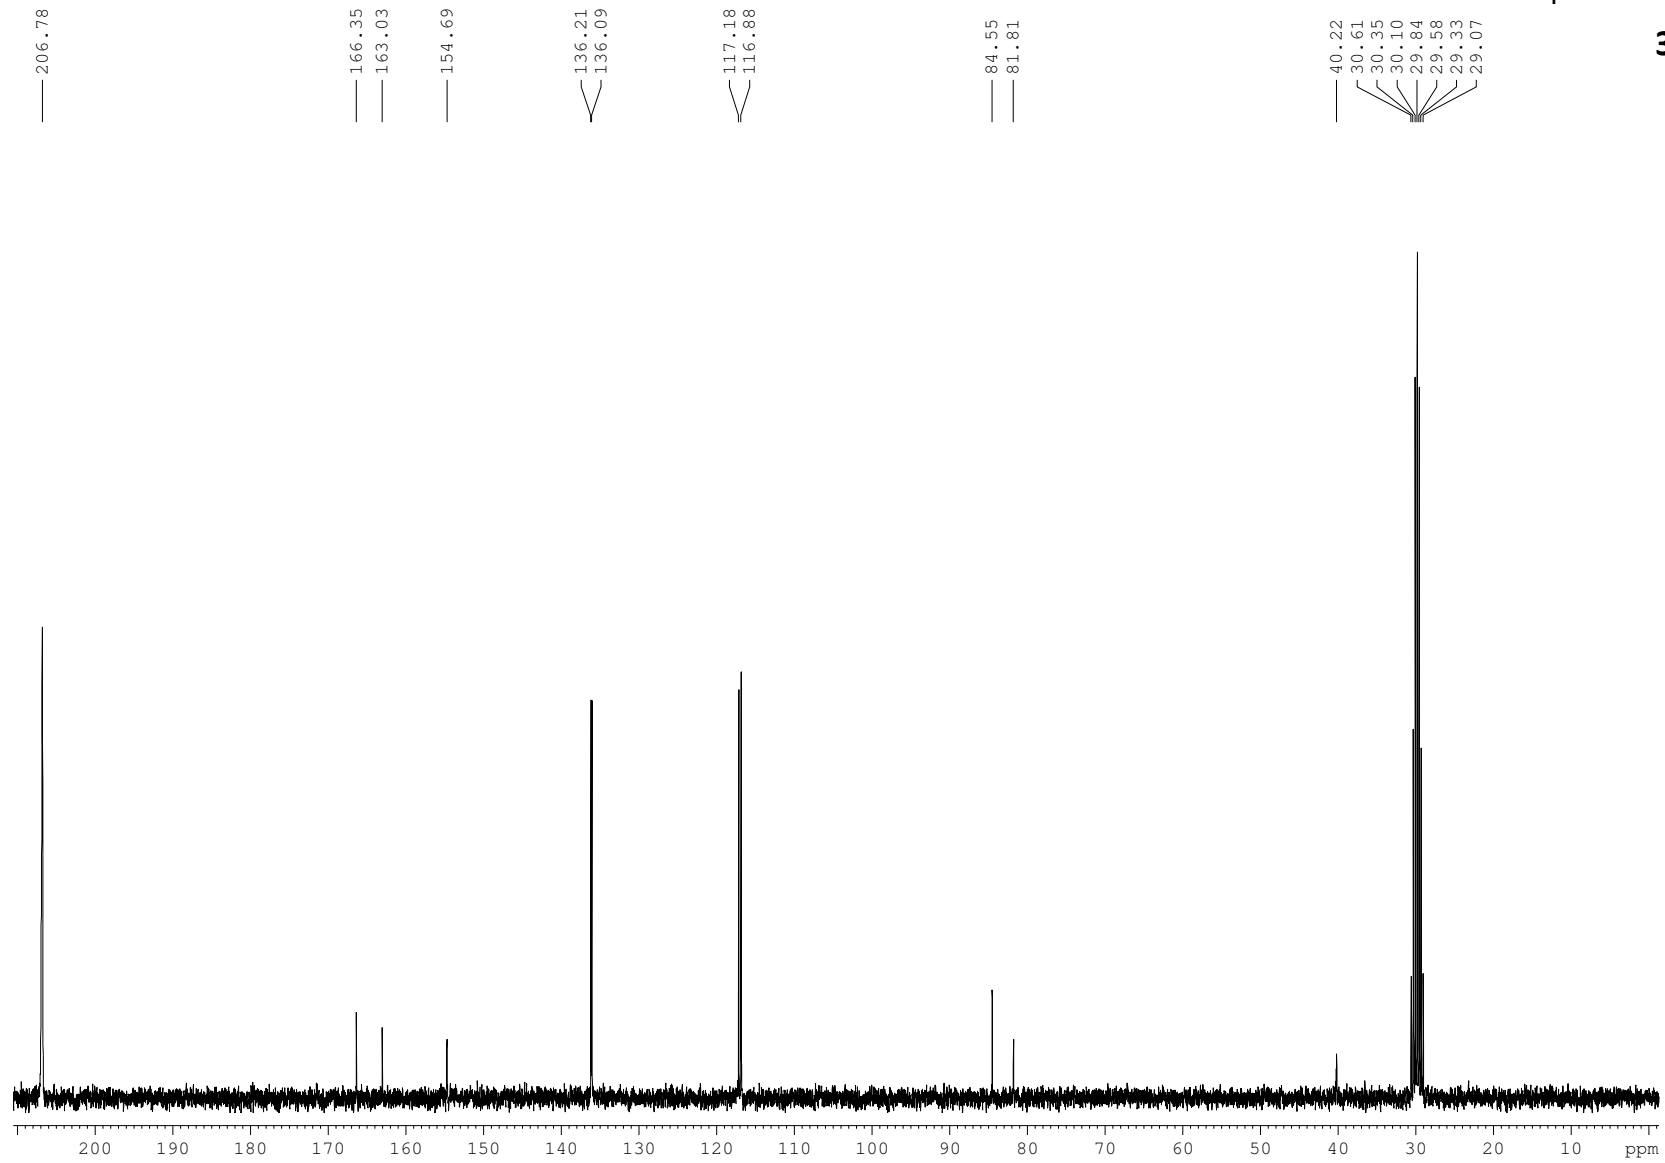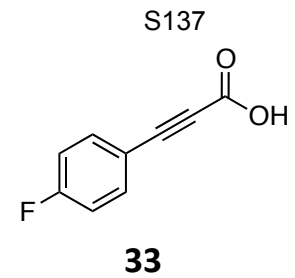

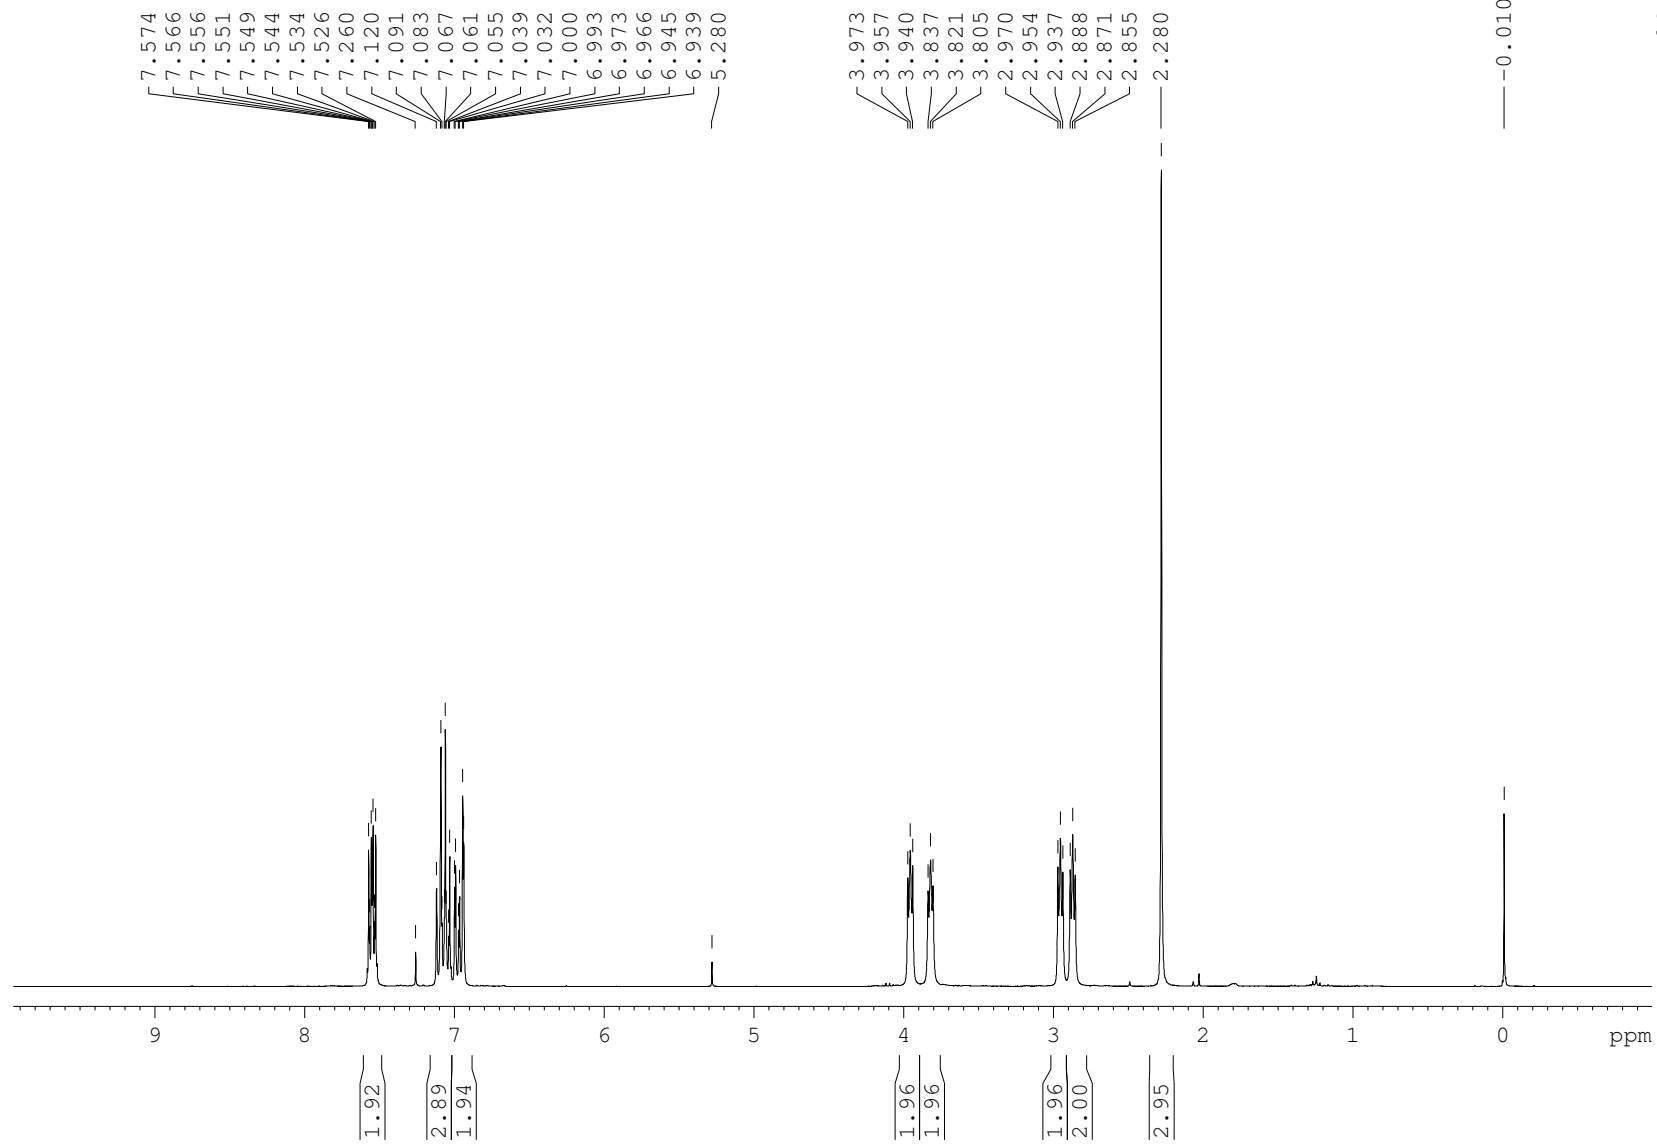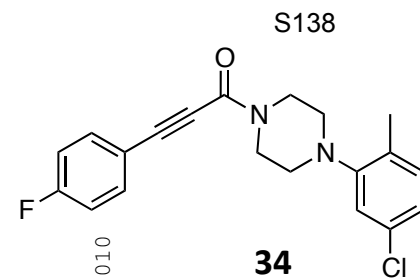

S139

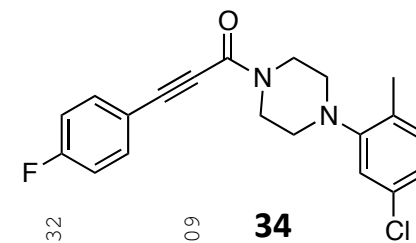**34**— 165.17  
— 161.83— 152.98  
— 151.70— 134.54  
— 134.42  
— 132.05  
— 131.81  
— 130.92  
— 123.72  
— 119.78  
— 116.47  
— 116.42  
— 116.11  
— 115.81

— 89.85

— 80.85  
— 77.42  
— 77.00  
— 76.57— 51.85  
— 51.28  
— 47.35  
— 41.84

— 17.32

— -0.09

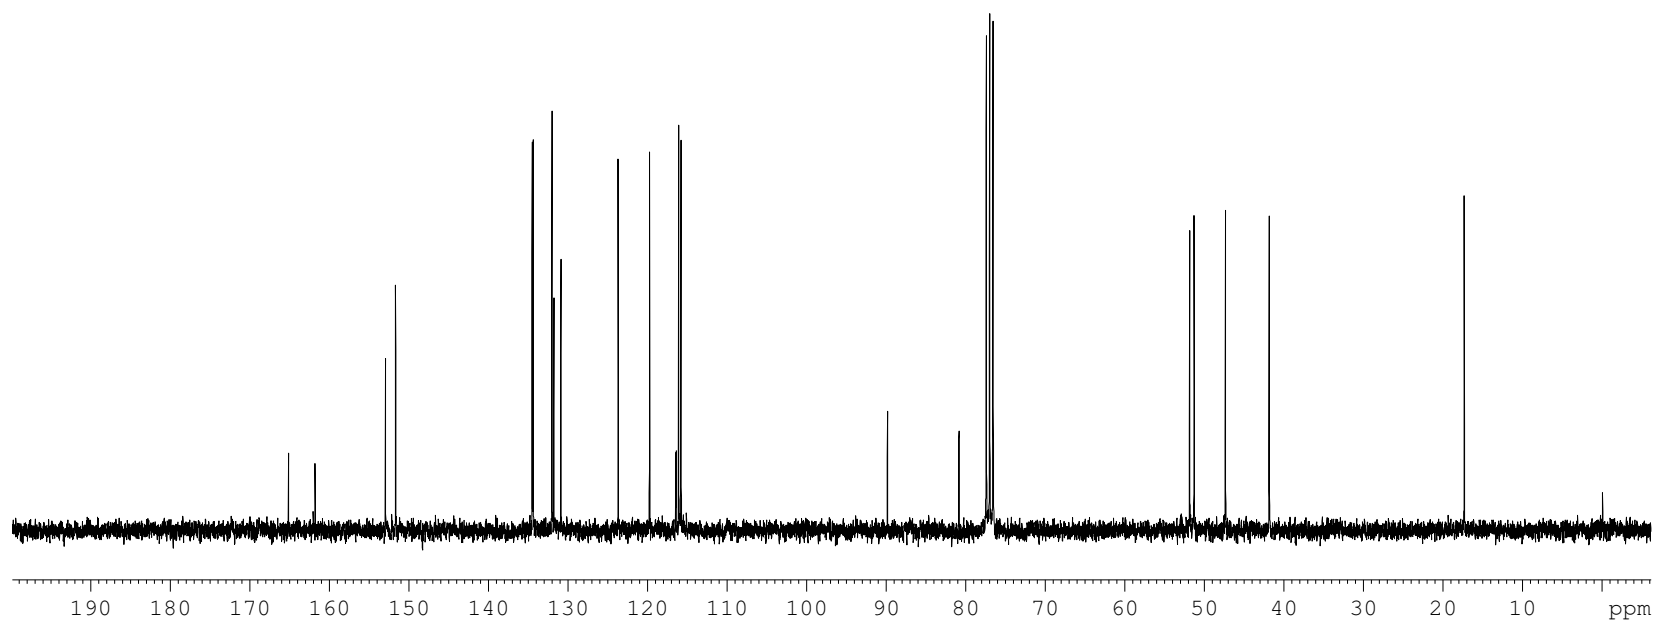

S140

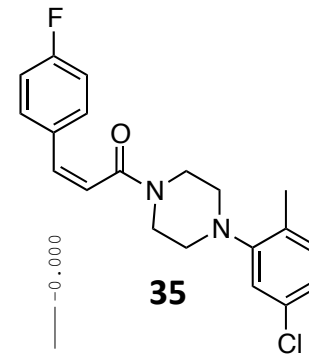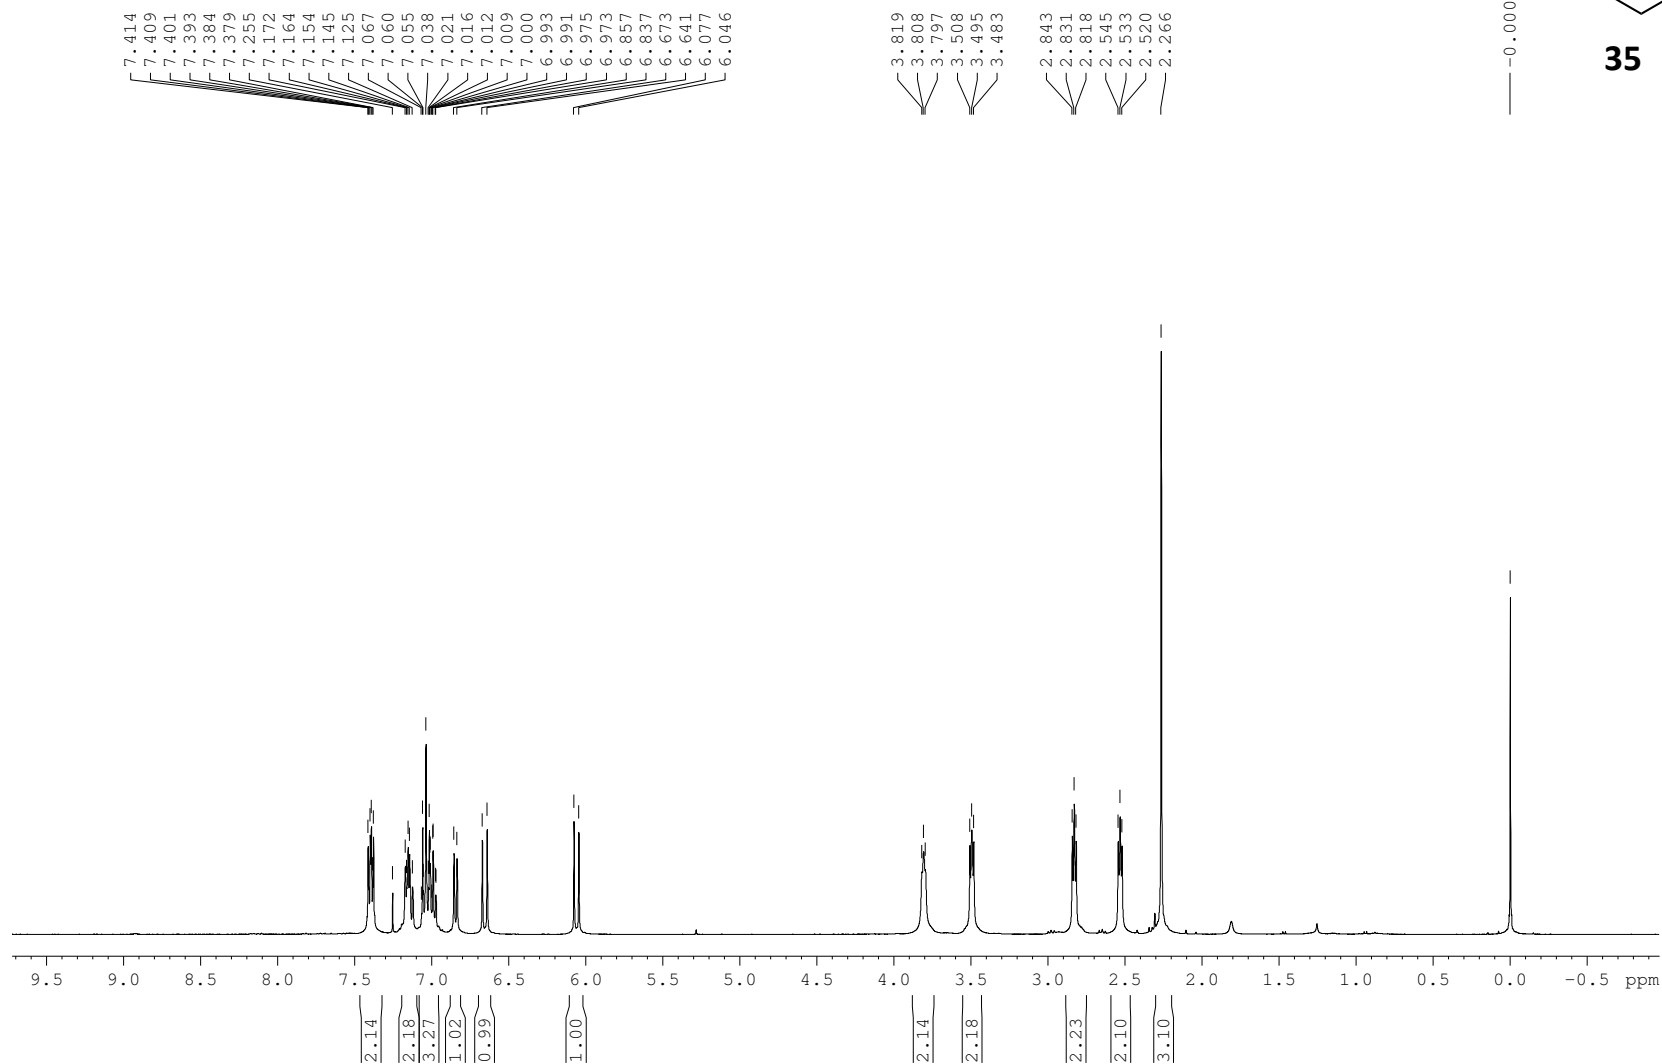

S141

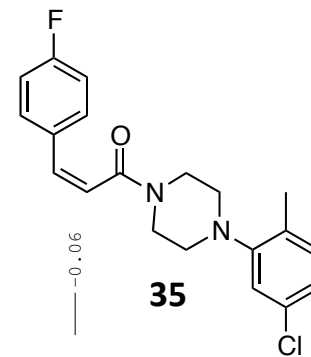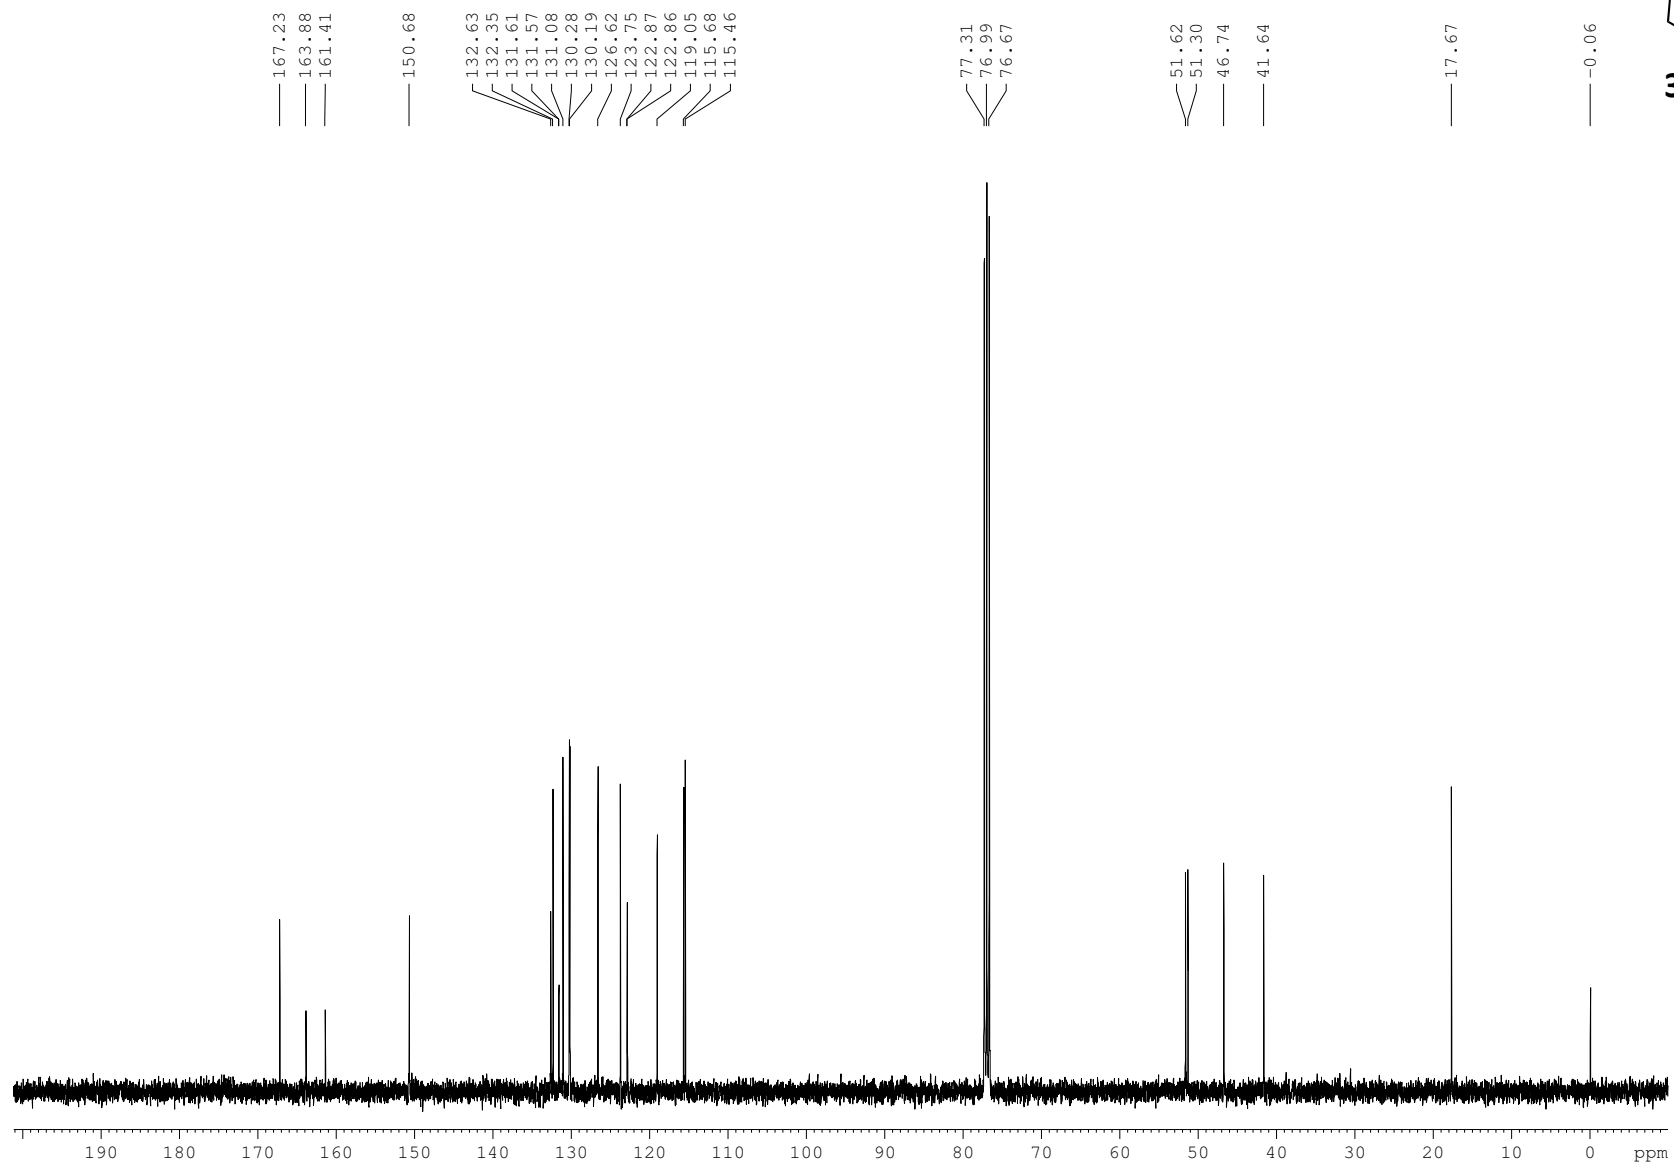

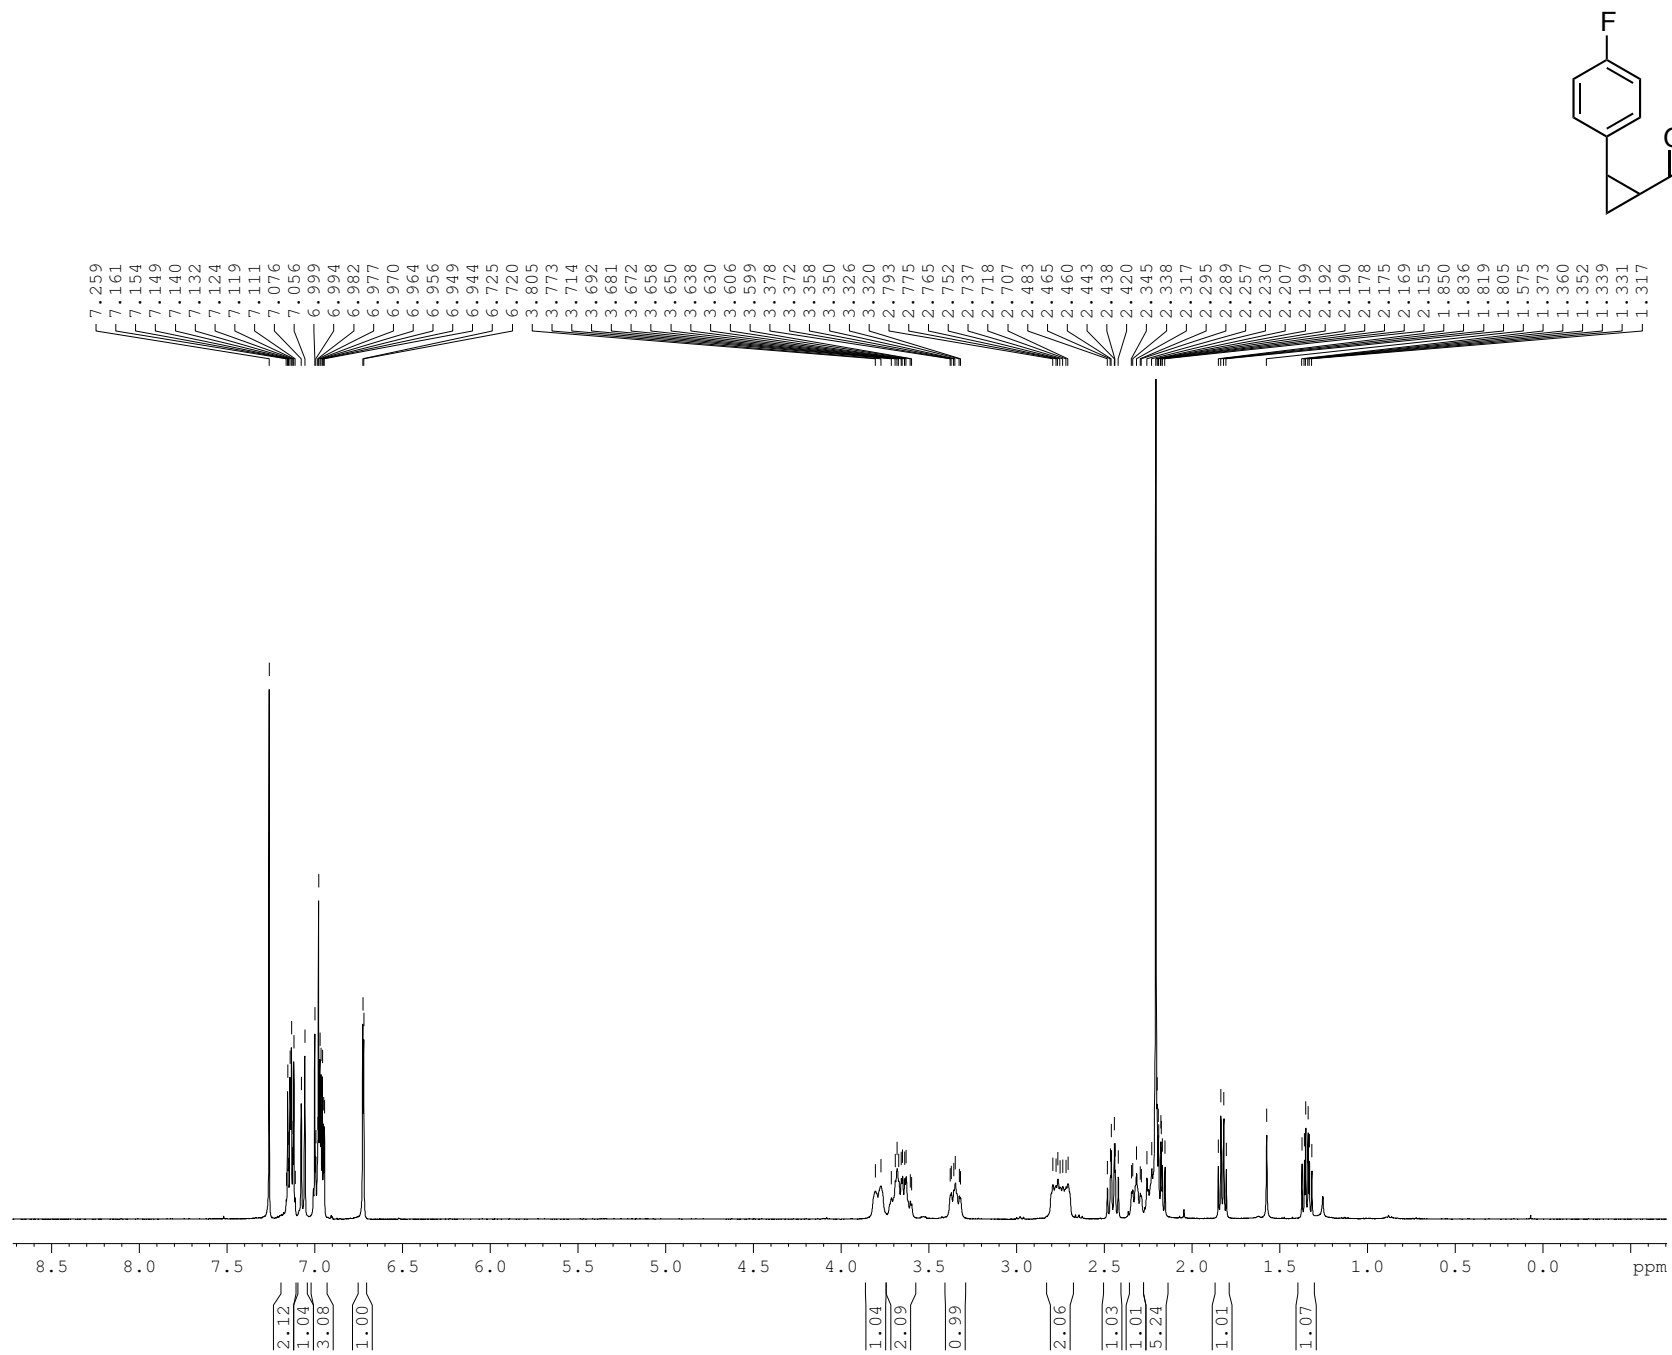**27**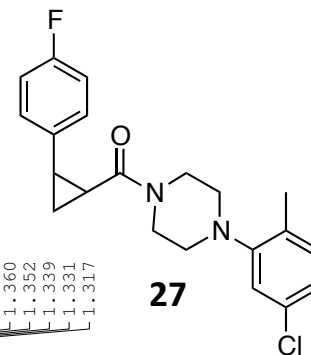

S143

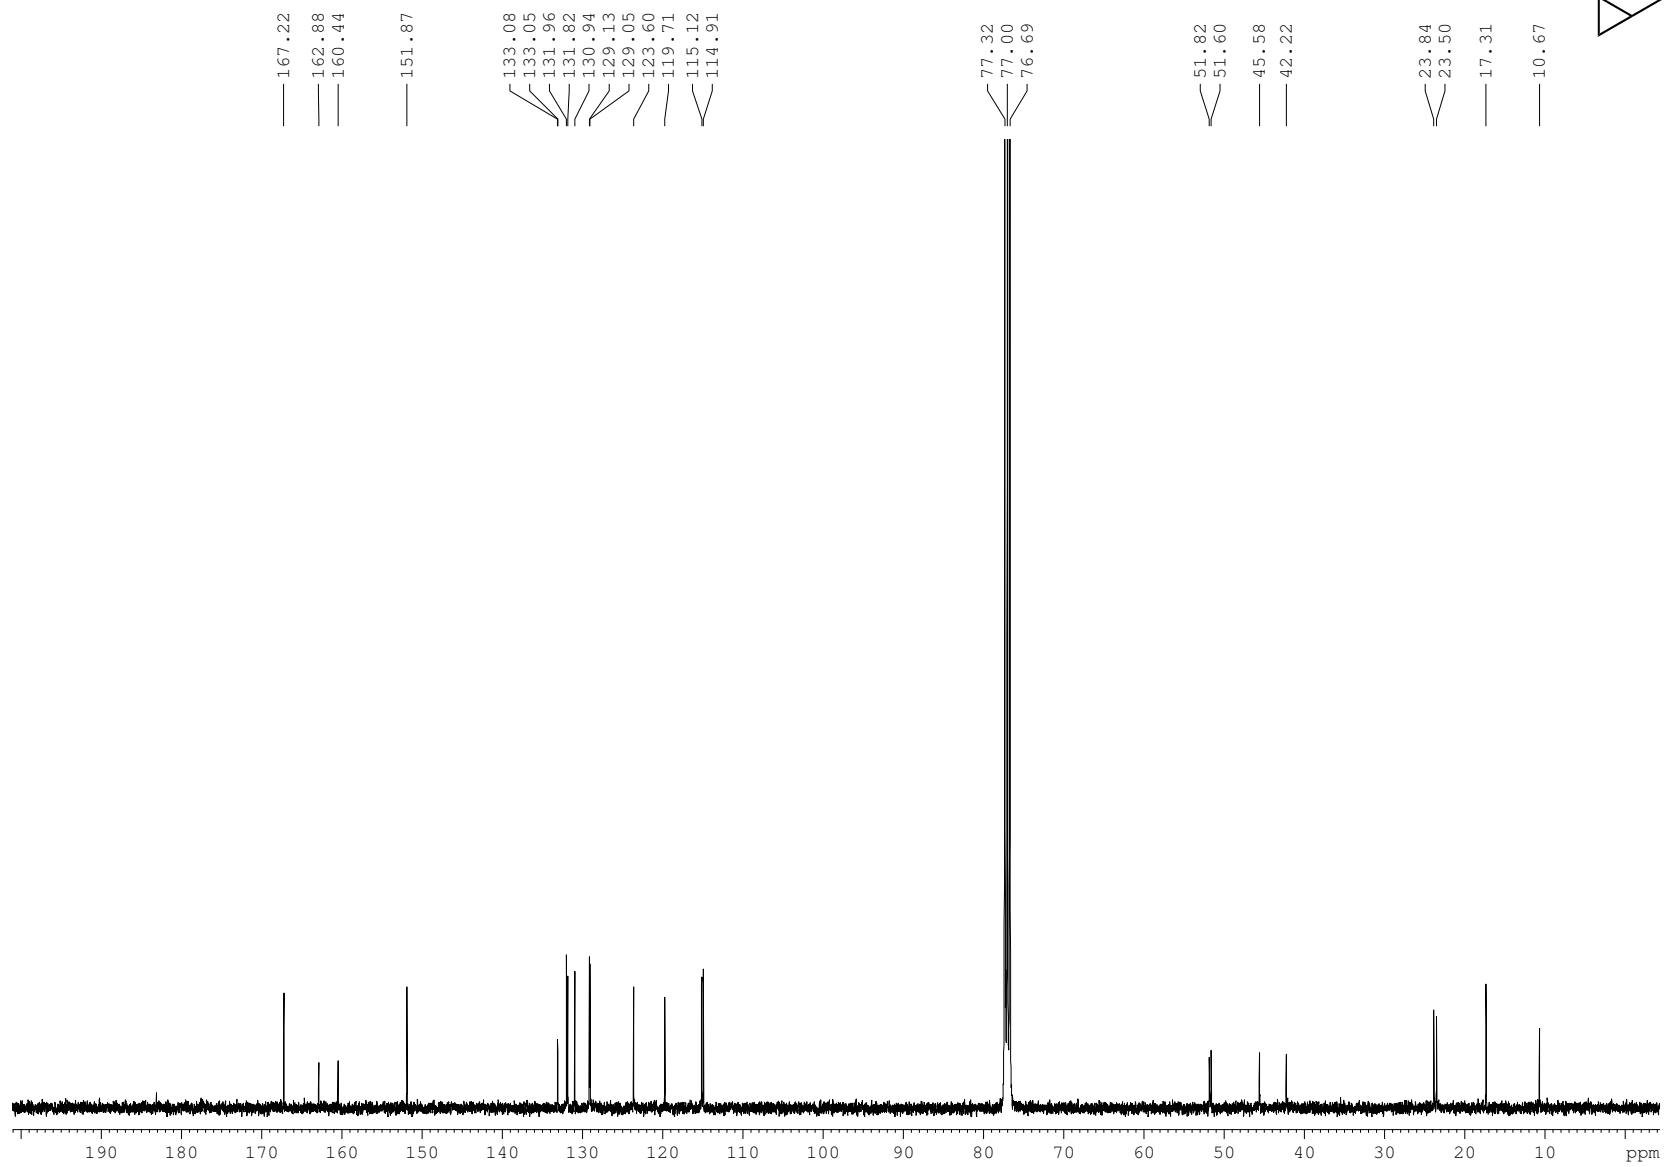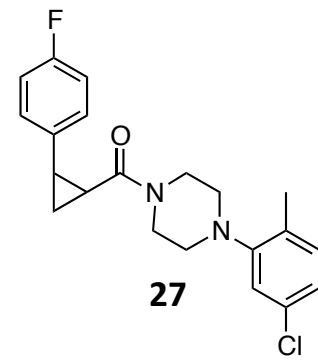

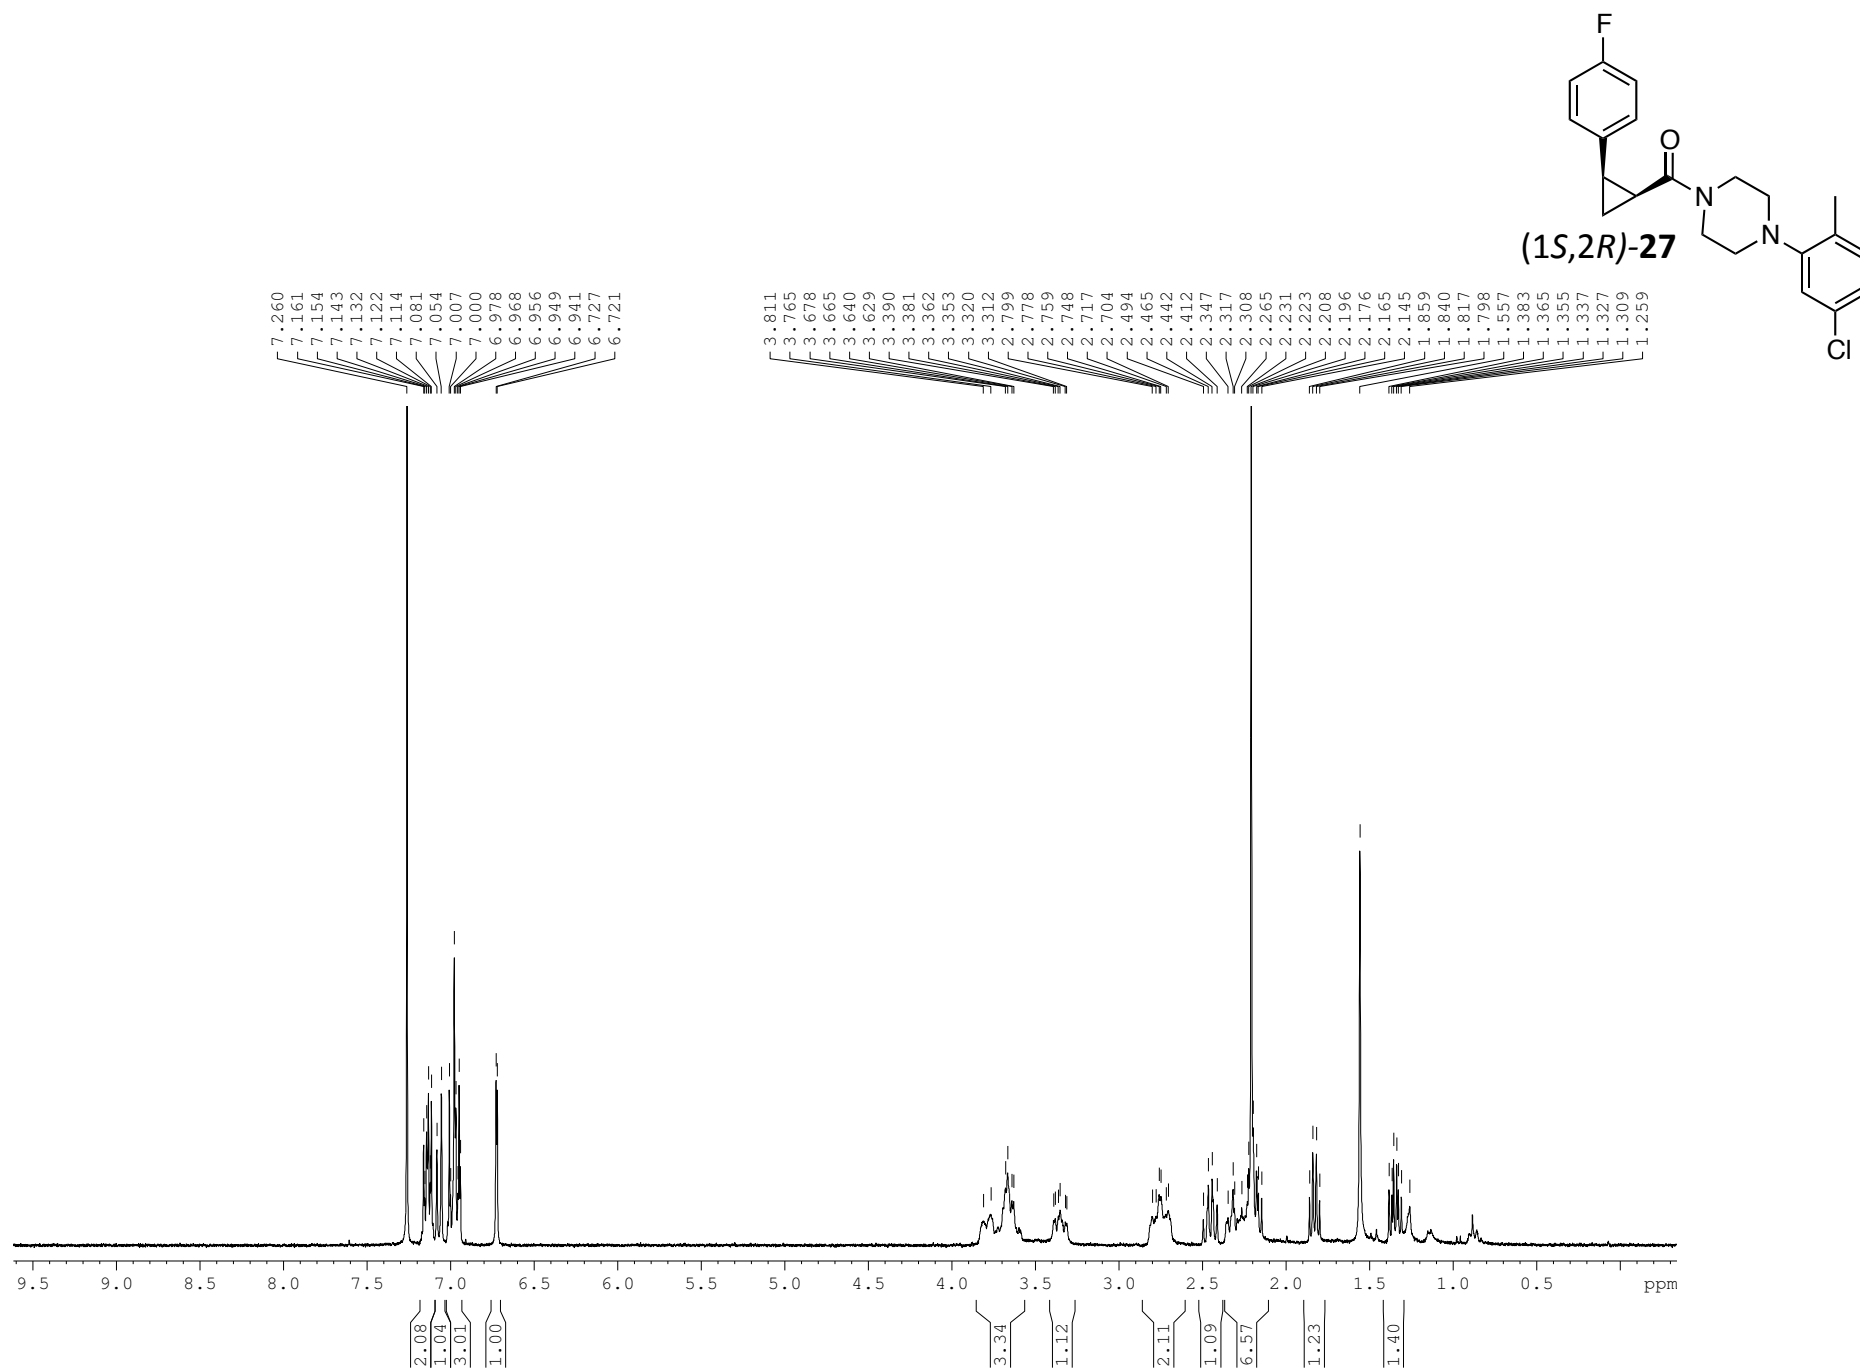



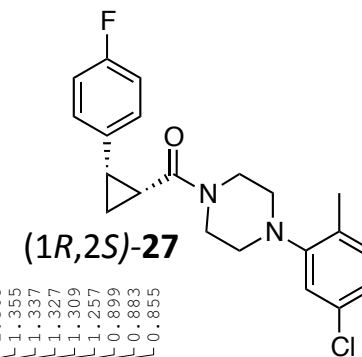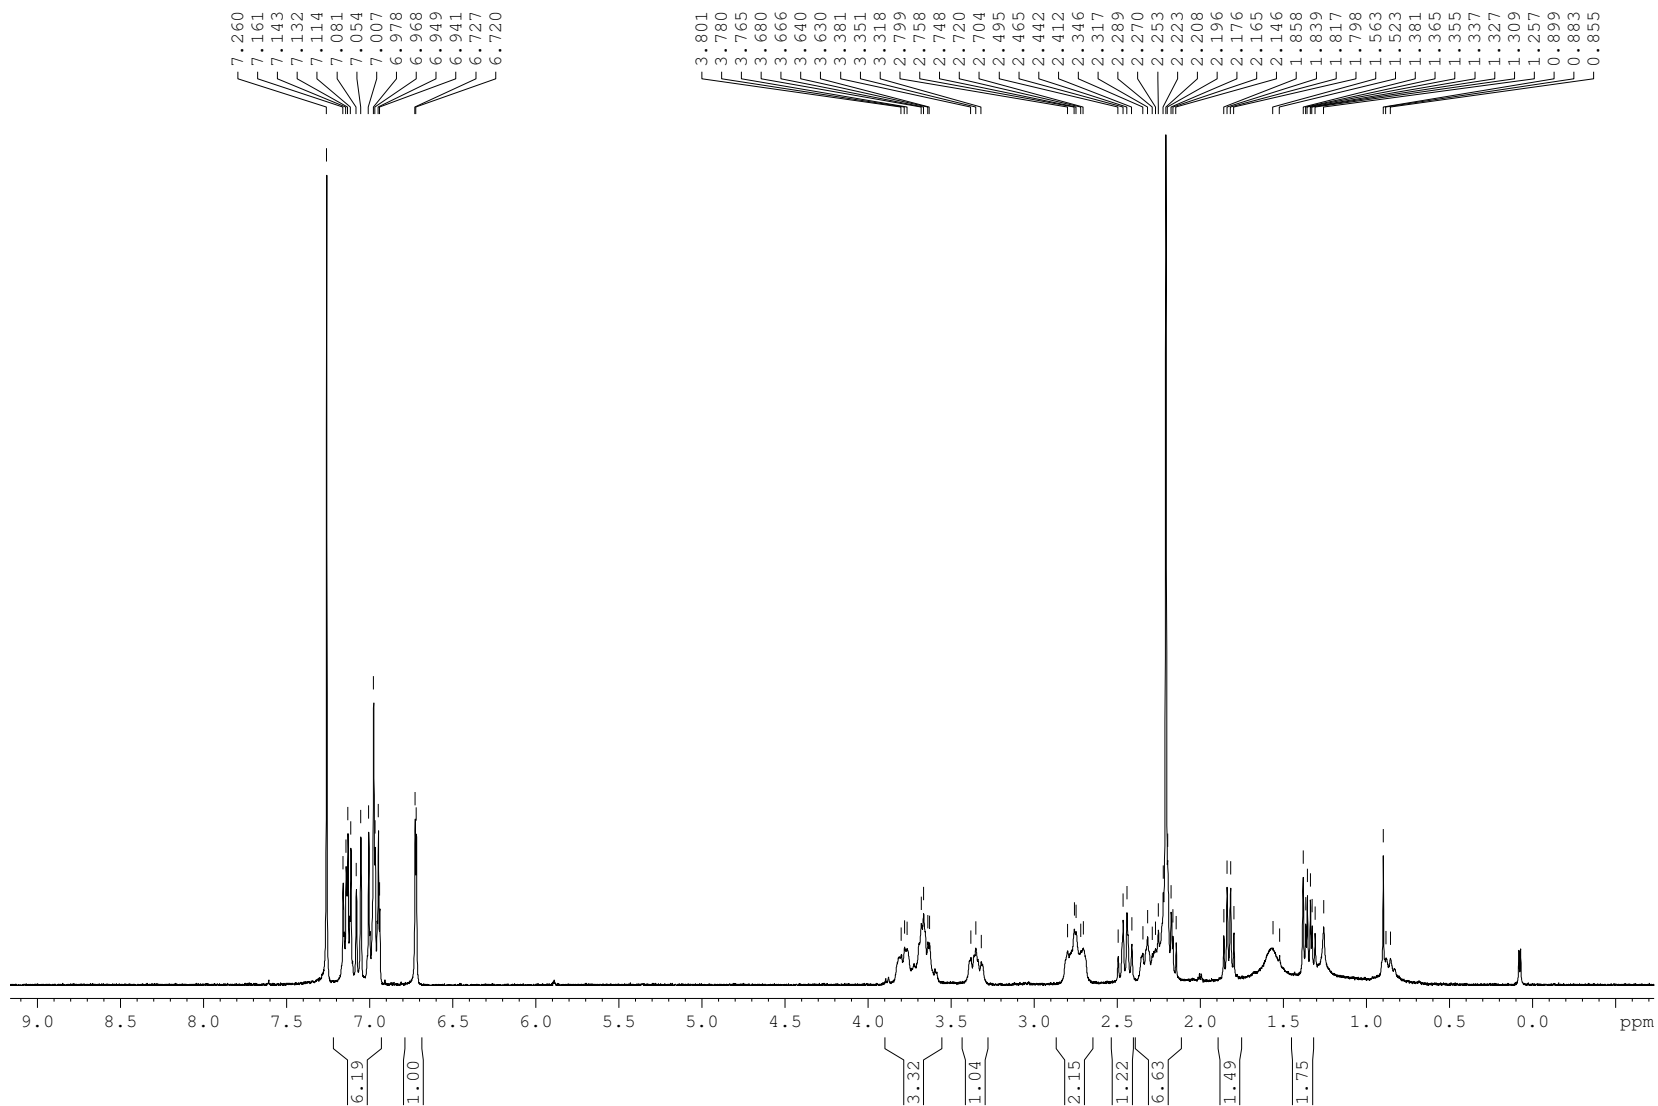

Supplement: ml6b00186_si_001.pdf [file ml6b00186_si_001.pdf]
